# Supplementary material for: Spatial Transcriptomic Analysis Using R-Based Computational Machine Learning Reveals the Genetic Profile of Yang or Yin Deficiency Syndrome in Chinese Medicine Theory
Source: Evid Based Complement Alternat Med. 2022 Mar 16;2022:5503181. doi: 10.1155/2022/5503181 (PMC8942619; doi:10.1155/2022/5503181)
Supplement: Supplementary Materials — Supplementary Data 1: normalized data set of GSE87474 by DESeq-2 in R. Supplementary Data 2: the value of module eigengenes of filtered genes in the Yang deficiency group. Supplementary Data 3: the value of module eigengenes of filtered genes in the Yin deficiency group. [file 5503181.f1.zip]

Archive with 3 entries (3 files):
- 5503181.f1/supplementary data 1.txt
- 5503181.f1/supplementary data 2.txt
- 5503181.f1/supplementary data 3.txt
