# Supplementary material for: Spatial Transcriptomic Analysis Using R-Based Computational Machine Learning Reveals the Genetic Profile of Yang or Yin Deficiency Syndrome in Chinese Medicine Theory
Source: Evid Based Complement Alternat Med. 2022 Mar 16;2022:5503181. doi: 10.1155/2022/5503181 (PMC8942619; doi:10.1155/2022/5503181)
Supplement: Supplementary Materials — Supplementary Data 1: normalized data set of GSE87474 by DESeq-2 in R. Supplementary Data 2: the value of module eigengenes of filtered genes in the Yang deficiency group. Supplementary Data 3: the value of module eigengenes of filtered genes in the Yin deficiency group. [file 5503181.f1.zip › 5503181.f1/supplementary data 1.txt]

	Yin deficiency group-DESeq2 nomorlized														Yang deficiency group-DESeq2 nomorlized
Gene	GSM2332366	GSM2332367	GSM2332368	GSM2332369	GSM2332370	GSM2332371	GSM2332372	GSM2332373	GSM2332374	GSM2332375	GSM2332376	GSM2332377			GSM2332378	GSM2332379	GSM2332380	GSM2332381	GSM2332382	GSM2332383	GSM2332384	GSM2332385	GSM2332386	GSM2332387	GSM2332388	GSM2332389
RFC2	6.353426432	6.236991504	6.381070056	6.378904287	6.479626591	6.272102913	6.199868462	6.200491318	6.455030777	6.397409345	6.433806523	6.399236727			6.270831711	6.161037683	6.296009238	6.249728378	6.325663512	6.341753215	6.100852647	6.351042989	6.072159043	6.419663613	6.293893915	6.530701928
HSPA6	6.67663947	6.585025967	6.975598912	7.072074953	7.741377358	6.906900487	6.70629957	6.634613481	7.078692348	7.494380113	7.412430405	7.707215975			7.169558147	7.678975943	7.623635096	7.108599134	7.754867436	8.073916628	6.703510348	7.528571457	7.62665593	8.131686341	7.879618863	8.079475189
PAX8	6.572000645	6.70264792	6.804358135	6.768457421	6.778333959	6.942778644	6.720331399	6.54238538	6.420289769	6.727771655	6.74302688	6.715685762			6.843520023	6.89425226	6.621866334	6.825647923	7.018714537	6.788533248	6.86113669	6.88279524	7.240826832	6.704400661	6.769814393	6.546965114
GUCA1A	4.575802893	4.670696999	4.57319416	4.674165658	4.672976353	4.669210836	4.671909376	4.67214456	4.579910968	4.57829376	4.578681588	4.675030326			4.573378088	4.672986662	4.678036016	4.579232538	4.674894505	4.680784654	4.666349345	4.67733381	4.672468385	4.579715888	4.574638121	4.679276406
THRA	6.852144484	6.83685383	6.638644923	6.610501176	6.651872466	6.954536245	6.588584941	6.477250752	6.472073048	6.62625198	6.612424426	6.643158253			6.653870099	6.709541766	6.738791605	6.962463187	6.887774837	6.788533248	6.717352804	6.805006283	6.693801425	6.58509521	6.583527012	6.610150852
PTPN21	4.755210397	4.754295638	4.751893173	4.75814449	4.756824857	4.752646498	4.755640931	4.755901895	4.676228538	4.674375544	4.758870438	4.759103891			4.752127066	4.832073274	4.762438758	4.759570873	4.834374933	4.765488247	4.749471072	4.761659666	4.756261215	4.8357146	4.670186661	4.763814935
CCL5	11.60226458	11.8859491	11.04902963	11.32992226	11.43624054	11.48488151	11.43353114	11.34030962	11.60199733	11.67310462	11.52225904	11.52999662			10.97735869	11.22433019	10.9409822	11.30488463	11.28937618	11.0822186	11.07749225	11.36711908	11.46567071	11.28914938	11.29243606	11.17433834
CYP2E1	4.755210397	4.829310755	4.751893173	4.833495658	4.832060837	4.827517541	4.830773541	4.831057292	4.760433352	4.758377372	4.834284959	4.675030326			4.752127066	4.756836295	4.838164539	4.759570873	4.834374933	4.841479839	4.666349345	4.761659666	4.756261215	4.760185353	4.75372934	4.763814935
EPHB3	5.021260339	5.127827214	5.072206902	5.133294986	5.131420513	5.125483784	5.077319638	5.07767559	5.083855234	5.133625759	5.081724113	5.082042457			5.124745594	5.023379039	5.086589317	5.026941938	5.231913008	5.090745993	5.120970451	5.08552719	5.130619815	5.027742458	5.074712018	5.03247027
ESRRA	6.458694646	6.456347717	6.723982833	6.466214763	6.680992703	6.452113773	6.459798842	6.35515187	6.733353639	6.611118237	6.672002194	6.518511003			6.532501779	6.695356297	6.477200006	6.598966024	6.518120514	6.397260316	6.443950877	6.369495807	6.444392429	6.690040551	6.488208792	6.610150852
CYP2A6	5.178846269	5.075484552	5.124413185	5.183169958	5.078934438	5.125483784	5.272159431	5.07767559	5.083855234	5.133625759	5.134326058	5.134657618			5.124745594	5.131436762	5.139393123	5.135320824	5.277360745	5.193985542	5.217463012	5.188348072	5.358317046	5.186176547	5.019330183	5.03247027
SCARB1	6.335053583	6.133743518	6.466918101	6.3236689	6.182016899	6.365117494	6.390520446	6.692829643	6.505529546	6.564688735	6.468073577	6.381306193			6.363812997	6.428641061	6.276469871	6.249728378	6.362758453	6.263979012	6.283411645	6.294111243	6.300116343	6.521312301	6.420740797	6.356375204
TTLL12	6.335053583	6.456347717	6.416065864	6.431963689	6.496214277	6.517901111	6.354500778	6.391177827	6.554222763	6.361323873	6.501497136	6.326035119			6.191474675	6.544828718	6.371433561	6.364296876	6.416551438	6.433035159	6.460664294	6.351042989	6.180680559	6.384012296	6.153715287	6.299360124
CYTOR	5.675163238	5.924394797	5.786297964	5.680916057	6.027356679	6.041107813	5.927324133	5.849619762	6.035483694	6.007147555	5.984087218	5.984604144			5.729367494	5.954995204	5.808066406	6.009813061	5.828775524	5.869833136	5.694326353	5.940412629	5.580373693	5.937209136	5.996755356	6.066466624
WFDC2	4.755210397	4.754295638	4.751893173	4.75814449	4.672976353	4.669210836	4.755640931	4.67214456	4.676228538	4.758377372	4.758870438	4.675030326			4.826952719	4.756836295	4.678036016	4.675451203	4.758953191	4.765488247	4.749471072	4.67733381	4.756261215	4.676005019	4.574638121	4.679276406
MAPK1	7.357722449	7.432436937	7.347669535	7.207298541	7.537401361	7.323174157	7.267601288	7.350932508	7.4342705	7.526433572	7.685351839	7.544433923			7.391909959	7.448562882	7.361672344	7.298121853	7.612820093	7.540299961	7.322538424	7.613725746	7.589444927	7.805324361	7.717963649	7.763381578
ADAM32	4.575802893	4.575083476	4.668531973	4.578110585	4.577072651	4.669210836	4.576141497	4.576346741	4.579910968	4.674375544	4.578681588	4.578865217			4.668742746	4.577081647	4.581488511	4.579232538	4.674894505	4.583887599	4.571289567	4.67733381	4.672468385	4.676005019	4.670186661	4.582571142
SPATA17	4.671521376	4.670696999	4.668531973	4.578110585	4.672976353	4.669210836	4.671909376	4.67214456	4.579910968	4.674375544	4.578681588	4.578865217			4.668742746	4.672986662	4.678036016	4.675451203	4.674894505	4.680784654	4.749471072	4.67733381	4.756261215	4.676005019	4.75372934	4.582571142
PRR22	5.178846269	5.224817412	5.309517974	5.183169958	5.181225517	5.22230402	5.315573	5.17986539	5.279684298	5.231035996	5.277230825	5.082042457			5.309895962	5.359270028	5.237220415	5.185271371	5.231913008	5.287615833	5.305602893	5.236034308	5.31657482	5.279295022	5.074712018	5.191521938
PXK	6.55637878	6.645093489	6.326809626	6.483021486	6.51260224	6.365117494	6.459798842	6.443475127	6.505529546	6.432554941	6.612424426	6.672628628			6.51654503	6.778365411	6.833573823	6.6444031	6.784182087	6.64511704	6.5255352	6.664803082	6.392082828	6.827347356	6.658184966	6.810926034
VPS18	4.962194691	4.961062731	5.072206902	5.025083574	5.078934438	4.959021888	5.021821388	5.07767559	4.968656783	4.966113228	5.026029397	4.967012072			5.072526028	5.023379039	5.030677827	4.9675898	5.081836958	4.841479839	5.262464373	5.08552719	5.130619815	4.968349985	4.82869499	4.97283973
MSANTD3	6.458694646	6.422181708	6.250863503	6.226218423	6.095896356	6.192716302	6.47657878	6.220836038	6.21129524	6.361323873	6.287310509	6.468671191			6.191474675	6.182044016	6.174216609	6.167474342	6.550359453	6.181376654	6.033877295	6.150962502	5.928674311	6.12576465	6.110766989	6.514242606
SLC46A1	4.755210397	4.670696999	4.668531973	4.674165658	4.672976353	4.827517541	4.755640931	4.755901895	4.579910968	4.758377372	4.758870438	4.675030326			4.752127066	4.577081647	4.581488511	4.675451203	4.758953191	4.765488247	4.666349345	4.761659666	4.831447986	4.760185353	4.670186661	4.582571142
TIMD4	4.830305409	4.829310755	4.751893173	4.833495658	4.832060837	4.827517541	4.830773541	4.899660188	4.835984234	4.966113228	4.834284959	4.967012072			4.895259013	4.964206513	4.907280352	4.835046512	5.081836958	4.910834624	5.013779632	4.906372237	5.078165685	4.9046537	4.897127216	4.839660693
SLC39A5	5.314877587	5.177497987	5.309517974	5.230681282	5.274018851	5.310735353	5.315573	5.22726495	5.136545634	5.276456696	5.277230825	5.232142525			5.391494528	5.359270028	5.189495458	5.321918649	5.320921533	5.331466187	5.347058047	5.281608998	5.511065785	5.279295022	5.223954398	5.141346844
ATP6V1E2	5.735584141	5.355059147	5.605226979	5.440565417	5.547274504	5.700649218	5.545095828	5.579700943	5.588180918	5.584334578	5.585257181	5.618951112			5.637815193	5.475800624	5.625290019	5.51704363	5.618664536	5.491116316	5.632675277	5.484342289	5.580373693	5.322910499	5.470294105	5.488156325
AFG3L1P	7.666766431	7.746884183	7.575840294	7.772449453	7.741377358	7.832702939	7.675224061	7.836788234	7.913281034	7.81262346	7.858870543	7.974305808			7.391909959	7.380246175	7.423245258	7.456910669	7.463346265	7.325085718	7.079149285	7.552305007	7.387223096	7.318509198	7.640593999	7.679320966
CILP2	4.671521376	4.754295638	4.668531973	4.674165658	4.672976353	4.752646498	4.671909376	4.755901895	4.760433352	4.674375544	4.758870438	4.675030326			4.668742746	4.756836295	4.678036016	4.759570873	4.758953191	4.583887599	4.666349345	4.67733381	4.831447986	4.676005019	4.670186661	4.679276406
PIGX	5.705750319	5.872825925	5.728895689	5.741494725	5.738837013	5.869303464	5.821859812	5.645114208	5.859182544	5.933278335	5.959461193	5.82909			6.039925675	6.07347579	6.063347956	5.857363544	6.306723988	6.360511157	5.72400799	6.107036912	5.90311196	6.365826852	5.702804075	6.4463398
TMEM196	4.830305409	5.02006822	4.958089577	4.902274621	4.900736207	4.959021888	5.021821388	4.963050343	4.835984234	5.025386996	4.903120894	4.903393038			4.895259013	4.900749543	4.907280352	4.9675898	4.903217362	5.090745993	5.120970451	4.837317508	5.18039492	4.968349985	5.019330183	4.839660693
SLC39A13	6.787244627	6.797937669	6.723982833	6.670053678	6.869288532	6.870075801	6.720331399	6.707007585	6.661526795	6.886161884	6.627562578	6.757441861			6.66831393	6.528825272	6.621866334	6.772363908	6.581855462	6.66014795	6.823375986	6.634969487	6.904932572	6.58509521	6.568095258	6.337638267
BEST4	4.898853994	4.897787478	4.751893173	4.833495658	4.756824857	4.895864666	4.830773541	4.831057292	4.904942788	4.966113228	4.903120894	4.903393038			4.895259013	4.832073274	4.838164539	4.835046512	4.758953191	4.841479839	4.892161979	4.761659666	4.756261215	4.8357146	4.75372934	4.763814935
AK9	4.755210397	4.754295638	4.751893173	4.75814449	4.672976353	4.669210836	4.755640931	4.755901895	4.676228538	4.966113228	4.758870438	4.759103891			4.752127066	4.756836295	4.838164539	4.903937406	4.758953191	4.841479839	4.749471072	4.761659666	4.756261215	4.8357146	4.897127216	4.679276406
CORO6	5.021260339	5.075484552	5.016936974	5.025083574	5.023364134	5.310735353	5.179480794	5.022161454	5.083855234	5.025386996	5.134326058	5.02633355			5.072526028	5.131436762	5.086589317	5.08267923	5.026137212	5.143722048	5.217463012	4.97017379	5.130619815	5.027742458	5.127022547	4.97283973
TMEM106A	4.962194691	4.961062731	5.016936974	5.133294986	4.96419236	4.959021888	4.962727433	5.022161454	5.083855234	5.133625759	5.184239499	5.02633355			4.895259013	4.964206513	4.971137515	5.026941938	5.026137212	4.974909316	4.824064554	4.906372237	4.900079099	4.9046537	4.960361946	5.088465276
ALG10	4.830305409	4.829310755	4.826698385	4.833495658	4.832060837	4.895864666	4.830773541	4.899660188	4.835984234	4.902546106	4.758870438	4.903393038			4.826952719	4.900749543	4.762438758	4.835046512	4.903217362	4.841479839	4.95509176	4.906372237	4.900079099	4.9046537	5.176663242	4.839660693
TTC39C	6.67663947	6.369256879	6.593906435	6.610501176	6.411171091	6.252696868	6.541702766	6.443475127	6.472073048	6.449791229	6.36255231	6.228519387			6.450779436	6.139690318	6.55945194	6.614279328	6.416551438	6.322729416	6.493486281	6.014475155	6.356048217	6.384012296	6.153715287	6.299360124
NEXN	6.135885392	6.522203956	6.892604645	7.3487563	6.357453938	6.365117494	6.853347376	6.336770405	6.058800298	6.286107378	7.095850007	6.72974495			6.128662562	6.33908937	6.833573823	5.960998245	6.729335705	6.046849157	5.888458397	6.061581638	5.823155468	6.210704523	7.213896186	6.610150852
C15orf40	7.500751512	7.300839224	7.075552062	7.03893357	6.989720673	7.140661531	7.179940126	7.249363394	7.373498516	7.167739929	7.052160309	7.220019563			6.868614822	6.818077001	7.116923117	7.150669335	6.984201378	6.815516516	6.897900689	7.026462891	6.62062287	6.840359326	6.848003928	6.95053404
RAX2	6.178188287	6.155050656	6.149383231	6.304739867	6.027356679	6.151160961	6.136893184	6.200491318	6.190564465	6.206396067	6.267819485	6.078664874			6.345725648	6.262881846	6.195308885	6.229639004	6.434016549	6.379011042	6.392535727	6.475208849	6.31902089	6.290517668	5.996755356	6.155991883
MFAP3	4.830305409	4.829310755	4.826698385	4.902274621	4.832060837	4.752646498	4.830773541	4.899660188	4.835984234	4.833748865	4.903120894	4.834538784			4.826952719	4.756836295	4.838164539	4.759570873	4.758953191	4.841479839	4.892161979	4.837317508	4.900079099	4.760185353	4.960361946	4.908884374
EYA3	5.226211339	5.224817412	5.124413185	5.133294986	5.181225517	5.073234723	5.021821388	5.07767559	5.186541852	5.081051734	5.134326058	5.02633355			5.309895962	5.228688517	5.282831612	5.321918649	5.184361414	5.241861901	5.068901814	5.13828695	5.130619815	5.186176547	5.019330183	5.284990894
GIMAP1	7.984749669	7.627836995	7.885887783	7.675965384	7.700057473	7.941840879	7.717134788	8.042914108	7.925377453	7.739468394	7.734180556	7.872129139			7.321604204	7.068288022	7.219964034	7.514163426	7.258445238	7.082271434	7.522410307	7.237397684	7.369729826	7.555586495	7.640593999	7.714949734
KLK8	4.830305409	4.829310755	4.958089577	4.75814449	4.756824857	4.827517541	4.830773541	4.755901895	4.760433352	4.833748865	4.834284959	4.759103891			4.895259013	4.756836295	4.762438758	4.835046512	4.834374933	4.765488247	4.824064554	4.837317508	4.831447986	4.8357146	4.75372934	4.839660693
CCDC65	5.021260339	5.127827214	4.894986292	4.902274621	4.96419236	4.827517541	4.962727433	4.963050343	4.968656783	5.025386996	4.966723249	4.903393038			4.826952719	4.900749543	4.971137515	4.9675898	4.966825629	4.910834624	4.892161979	4.906372237	4.96349495	4.9046537	4.82869499	4.908884374
FAM122C	4.898853994	4.670696999	4.751893173	4.833495658	4.832060837	4.827517541	4.830773541	4.831057292	4.835984234	4.833748865	4.758870438	4.759103891			4.752127066	4.672986662	4.678036016	4.759570873	4.674894505	4.841479839	4.666349345	4.761659666	4.672468385	4.760185353	4.75372934	4.908884374
CFAP53	4.575802893	4.575083476	4.57319416	4.578110585	4.577072651	4.573786562	4.576141497	4.576346741	4.676228538	4.57829376	4.578681588	4.578865217			4.573378088	4.577081647	4.581488511	4.579232538	4.578746679	4.583887599	4.571289567	4.580875628	4.576629343	4.579715888	4.574638121	4.582571142
ARMCX4	5.021260339	4.897787478	4.894986292	4.965825102	4.96419236	4.959021888	5.021821388	4.899660188	4.904942788	4.902546106	4.903120894	5.02633355			4.826952719	4.964206513	4.838164539	4.903937406	4.966825629	4.910834624	4.824064554	4.906372237	4.672468385	4.8357146	4.75372934	4.908884374
RBBP6	6.864768872	5.973948374	5.605226979	6.030330061	5.979555855	5.842741071	5.821859812	5.822404948	5.775356658	5.907671727	5.908733676	5.934858193			6.107038552	6.262881846	6.195308885	6.056843346	6.032151466	6.263979012	5.694326353	6.129183885	6.002418466	6.271008797	5.996755356	5.810901893
CENPBD1	5.178846269	5.02006822	5.016936974	5.08073415	5.131420513	5.125483784	5.077319638	5.022161454	5.186541852	5.081051734	5.184239499	5.321164816			4.826952719	4.832073274	4.971137515	4.9675898	4.966825629	4.910834624	4.892161979	4.97017379	4.831447986	5.083517091	5.019330183	5.141346844
TRIOBP	6.023716927	6.295286323	6.106494082	6.030330061	6.117963088	6.086250589	6.093164936	6.115818467	6.035483694	6.07700285	6.207571398	6.101150552			6.211763841	6.161037683	6.174216609	6.229639004	6.362758453	6.138053314	6.357137438	6.274582408	6.461389248	6.231111893	6.274751942	5.893120274
CATSPER1	5.874778949	5.924394797	6.128114271	5.770691209	6.161010743	5.920801938	5.821859812	5.676519456	5.885918494	5.933278335	6.22795958	6.00877027			6.0626842	6.139690318	6.039995332	5.910241939	6.166021103	5.756266266	6.056588734	5.861767998	5.877021718	6.189977453	6.274751942	6.089430298
HOXD4	4.755210397	4.754295638	4.668531973	4.674165658	4.756824857	4.669210836	4.671909376	4.67214456	4.760433352	4.758377372	4.758870438	4.675030326			4.668742746	4.756836295	4.581488511	4.675451203	4.674894505	4.680784654	4.666349345	4.67733381	4.672468385	4.676005019	4.75372934	4.839660693
GSC	4.830305409	4.754295638	4.751893173	4.75814449	4.756824857	4.895864666	4.671909376	4.67214456	4.676228538	4.758377372	4.758870438	4.759103891			4.752127066	4.672986662	4.762438758	4.759570873	4.758953191	4.765488247	4.749471072	4.761659666	4.831447986	4.760185353	4.82869499	4.679276406
SP7	4.830305409	4.961062731	4.826698385	4.965825102	4.900736207	4.895864666	4.899355941	4.899660188	4.835984234	4.902546106	4.903120894	4.834538784			4.958379046	4.832073274	4.907280352	4.903937406	4.903217362	4.910834624	5.013779632	4.837317508	4.96349495	4.9046537	4.82869499	4.763814935
PDE7A	6.602719743	6.021653618	6.231180609	6.65540544	6.479626591	6.580659449	6.761592488	6.828469441	6.705069679	6.415096369	6.22795958	6.582251823			6.107038552	6.117989662	6.407616136	6.486688319	6.100803272	6.360511157	6.056588734	6.351042989	6.116653492	6.034925516	6.088751925	6.337638267
CNOT7	6.258931807	5.846226641	5.84114824	5.770691209	6.003678437	5.638819991	5.821859812	5.902337387	5.746102027	5.771166046	5.908733676	5.82909			5.894194301	6.117989662	5.779441691	5.910241939	5.908911889	5.631081863	5.781288159	5.590474215	5.707839955	5.745602971	5.79009334	5.838913175
CRYZL1	6.540576384	6.70264792	6.892604645	6.808579891	6.856653483	7.066983793	7.00921226	6.903919803	7.011535548	6.848223934	6.756804291	6.925143689			6.724622549	6.393530912	6.55945194	6.731012859	6.248238598	6.397260316	6.477174375	6.557421116	6.072159043	6.401955633	6.403335252	6.837372018
PRSS33	4.962194691	5.075484552	5.072206902	4.965825102	5.078934438	5.175066943	5.077319638	4.963050343	4.904942788	4.966113228	5.026029397	5.082042457			5.221512266	5.228688517	5.086589317	5.135320824	5.081836958	5.193985542	5.120970451	5.13828695	5.273133659	5.083517091	4.960361946	4.97283973
CBARP	4.755210397	4.670696999	4.826698385	4.674165658	4.756824857	4.752646498	4.755640931	4.831057292	4.676228538	4.758377372	4.758870438	4.675030326			4.752127066	4.756836295	4.762438758	4.759570873	4.758953191	4.765488247	4.749471072	4.761659666	4.831447986	4.760185353	4.670186661	4.679276406
MCMDC2	4.575802893	4.670696999	4.668531973	4.578110585	4.672976353	4.669210836	4.671909376	4.67214456	4.676228538	4.57829376	4.674819923	4.578865217			4.573378088	4.672986662	4.581488511	4.579232538	4.578746679	4.680784654	4.666349345	4.67733381	4.576629343	4.676005019	4.670186661	4.582571142
TIRAP	5.92638681	6.021653618	6.106494082	6.142749844	5.904326788	6.01793201	5.765584463	6.200491318	6.251807871	6.185696055	6.055253575	6.03249082			5.841642826	5.878248779	5.808066406	5.935873456	5.85606051	5.756266266	5.694326353	5.777854965	6.09459615	6.12576465	5.972692125	6.019281744
LEAP2	6.157207032	5.99802248	6.084509773	5.957867742	5.878224374	6.129880015	6.047917902	6.093767116	6.310353528	6.054134205	6.00824889	6.166375696			5.919669855	5.76802324	5.916413596	6.009813061	5.908911889	5.922969332	5.96323731	5.965579616	5.877021718	5.885390003	5.948167464	5.919372936
MSI2	5.178846269	5.224817412	4.958089577	5.183169958	5.131420513	5.125483784	5.077319638	5.17986539	5.136545634	5.025386996	4.966723249	5.082042457			5.01724184	5.078950039	5.189495458	5.08267923	5.026137212	5.143722048	5.068901814	5.188348072	5.18039492	5.027742458	4.897127216	4.97283973
SCIN	4.671521376	4.575083476	4.668531973	4.674165658	4.672976353	4.669210836	4.671909376	4.755901895	4.676228538	4.674375544	4.674819923	4.675030326			4.752127066	4.672986662	4.762438758	4.675451203	4.674894505	4.680784654	4.666349345	4.761659666	4.672468385	4.676005019	4.82869499	4.763814935
CTCFL	4.575802893	4.575083476	4.668531973	4.578110585	4.672976353	4.573786562	4.671909376	4.576346741	4.676228538	4.57829376	4.578681588	4.675030326			4.573378088	4.672986662	4.678036016	4.579232538	4.578746679	4.680784654	4.571289567	4.580875628	4.576629343	4.676005019	4.75372934	4.582571142
C4orf33	6.023716927	5.819048866	6.106494082	5.90717009	6.320412428	5.759471391	5.794042325	6.071336163	5.885918494	6.32424337	6.100612564	6.05578349			5.919669855	5.954995204	6.174216609	6.056843346	5.908911889	5.973967849	5.498788233	5.861767998	5.877021718	6.103642086	6.110766989	6.514242606
ZNF333	5.472919445	5.733740373	5.503169792	5.583898782	5.581428876	5.670132517	5.579212308	5.707125488	6.126339959	5.799691225	5.618507166	5.651299987			5.669112897	5.76802324	5.808066406	5.619839068	5.828775524	6.070256365	5.498788233	5.556165515	5.580373693	5.444105384	5.541576858	6.019281744
TVP23C	5.793153127	5.872825925	5.84114824	5.799210667	5.929900938	5.994331672	6.093164936	5.952942608	5.831863608	5.799691225	5.984087218	5.801190191			5.868193585	6.161037683	5.890190414	5.884080349	5.882763593	5.814347965	5.987218498	6.061581638	6.138344816	6.12576465	5.79009334	5.838913175
RDH10	4.755210397	4.829310755	4.668531973	4.75814449	4.756824857	4.827517541	4.755640931	4.831057292	4.904942788	4.833748865	4.834284959	4.759103891			4.668742746	4.756836295	4.762438758	4.759570873	4.758953191	4.680784654	4.824064554	4.837317508	4.756261215	4.8357146	4.82869499	4.839660693
SRSF12	4.575802893	4.575083476	4.668531973	4.578110585	4.672976353	4.669210836	4.671909376	4.576346741	4.676228538	4.57829376	4.578681588	4.578865217			4.573378088	4.577081647	4.581488511	4.579232538	4.578746679	4.680784654	4.666349345	4.67733381	4.576629343	4.760185353	4.574638121	4.679276406
FAM71A	5.129126928	5.127827214	5.221155733	5.08073415	5.023364134	5.125483784	5.129738602	5.13010935	5.186541852	5.133625759	5.026029397	5.02633355			5.174301141	5.228688517	5.086589317	5.026941938	5.134443588	5.143722048	5.170384704	5.188348072	5.227812396	5.027742458	5.127022547	5.03247027
GAPT	7.789546203	7.082552528	7.765869076	7.850260215	7.513708778	7.200884575	7.854832922	7.478658966	7.675972446	7.633256242	7.801160658	7.351645627			7.538416459	7.621084453	7.490492085	7.405930893	7.106804103	7.571900103	7.458861723	7.29498303	7.404503257	7.785550075	7.640593999	7.763381578
ERICH5	4.575802893	4.575083476	4.57319416	4.578110585	4.577072651	4.573786562	4.576141497	4.576346741	4.579910968	4.57829376	4.578681588	4.578865217			4.573378088	4.577081647	4.581488511	4.579232538	4.578746679	4.583887599	4.571289567	4.580875628	4.576629343	4.676005019	4.574638121	4.582571142
CCDC185	4.898853994	4.754295638	4.826698385	4.833495658	4.832060837	4.827517541	4.755640931	4.831057292	4.904942788	4.902546106	4.758870438	4.759103891			4.826952719	4.832073274	4.762438758	4.835046512	4.834374933	4.841479839	4.892161979	4.837317508	4.831447986	4.8357146	4.82869499	4.839660693
ENTHD1	4.575802893	4.575083476	4.668531973	4.578110585	4.577072651	4.669210836	4.576141497	4.67214456	4.676228538	4.57829376	4.578681588	4.675030326			4.573378088	4.577081647	4.678036016	4.579232538	4.578746679	4.583887599	4.666349345	4.580875628	4.576629343	4.579715888	4.670186661	4.582571142
TSSK3	6.198840724	6.276136775	6.308224034	6.285539024	6.202693618	6.233003382	6.220209352	6.220836038	6.058800298	6.143294316	6.165826379	6.078664874			6.191474675	6.223079328	6.13098991	6.124338924	6.362758453	6.415266089	6.205371295	6.313358657	6.444392429	6.251210012	6.088751925	6.089430298
WFDC6	4.830305409	4.829310755	4.751893173	4.75814449	4.672976353	4.827517541	4.830773541	4.831057292	4.760433352	4.758377372	4.674819923	4.834538784			4.826952719	4.832073274	4.678036016	4.759570873	4.834374933	4.841479839	4.824064554	4.837317508	4.96349495	4.9046537	4.82869499	4.839660693
CLEC12A	7.944266245	7.185975858	8.862698259	7.725022442	8.848542773	8.250502091	8.564864279	8.352514565	7.799547564	7.793040686	8.781438303	8.714561746			7.874470465	8.797474192	9.047516793	7.736384511	8.987690726	7.115009937	7.313566801	8.141685496	6.763294341	8.683142344	9.121735552	7.574547086
BRF1	5.226211339	5.177497987	5.072206902	5.025083574	5.078934438	5.175066943	5.179480794	4.963050343	5.186541852	5.133625759	5.134326058	5.232142525			4.958379046	5.078950039	5.139393123	5.026941938	5.184361414	5.034649503	5.068901814	4.97017379	4.96349495	5.027742458	5.074712018	5.284990894
TMEM266	4.755210397	4.754295638	4.751893173	4.674165658	4.756824857	4.752646498	4.755640931	4.67214456	4.676228538	4.758377372	4.674819923	4.675030326			4.752127066	4.756836295	4.678036016	4.759570873	4.758953191	4.680784654	4.749471072	4.761659666	4.831447986	4.760185353	4.75372934	4.679276406
CALML6	4.755210397	4.829310755	4.668531973	4.674165658	4.756824857	4.752646498	4.899355941	4.831057292	4.760433352	4.758377372	4.758870438	4.759103891			4.752127066	4.756836295	4.838164539	4.759570873	4.758953191	4.841479839	4.749471072	4.761659666	4.672468385	4.760185353	4.75372934	4.839660693
NLRP5	4.755210397	4.829310755	4.826698385	4.833495658	4.832060837	4.827517541	4.755640931	4.67214456	4.760433352	4.758377372	4.834284959	4.834538784			4.826952719	4.900749543	4.838164539	4.759570873	4.834374933	4.765488247	4.824064554	4.761659666	4.831447986	4.8357146	4.670186661	4.763814935
ODF4	4.575802893	4.670696999	4.668531973	4.674165658	4.672976353	4.669210836	4.671909376	4.755901895	4.676228538	4.674375544	4.578681588	4.675030326			4.668742746	4.756836295	4.678036016	4.675451203	4.758953191	4.680784654	4.666349345	4.67733381	4.756261215	4.760185353	4.75372934	4.679276406
CLEC4F	5.076732377	5.075484552	4.826698385	5.401709994	5.023364134	5.310735353	4.899355941	5.315994494	5.859182544	4.902546106	5.231786974	4.834538784			4.826952719	5.878248779	5.189495458	4.9675898	4.966825629	4.974909316	4.892161979	5.08552719	5.18039492	5.136193459	5.074712018	5.239315252
WFDC9	4.575802893	4.670696999	4.668531973	4.674165658	4.672976353	4.752646498	4.671909376	4.67214456	4.676228538	4.674375544	4.674819923	4.759103891			4.668742746	4.672986662	4.678036016	4.675451203	4.758953191	4.680784654	4.95509176	4.67733381	4.900079099	4.676005019	4.75372934	4.582571142
NEDD1	5.472919445	5.395177263	5.309517974	5.319615918	5.317485076	5.539582822	5.357289055	5.22726495	5.323310776	5.478530615	5.32078794	5.801190191			5.637815193	5.399490075	5.408993433	5.586567617	5.68250086	5.527720859	5.120970451	5.556165515	5.31657482	5.279295022	5.269156525	5.692021059
TTLL10	4.898853994	4.897787478	4.894986292	4.965825102	5.023364134	4.895864666	4.830773541	4.831057292	4.904942788	4.902546106	4.834284959	4.903393038			4.895259013	4.900749543	4.907280352	4.903937406	4.903217362	4.910834624	4.824064554	4.97017379	5.078165685	4.8357146	4.82869499	4.908884374
CALR3	4.671521376	4.754295638	4.751893173	4.674165658	4.672976353	4.669210836	4.671909376	4.576346741	4.676228538	4.674375544	4.674819923	4.675030326			4.668742746	4.672986662	4.678036016	4.675451203	4.758953191	4.680784654	4.666349345	4.67733381	4.756261215	4.676005019	4.82869499	4.679276406
ZNF22-AS1	4.898853994	4.897787478	4.826698385	4.75814449	4.756824857	4.895864666	4.755640931	4.831057292	4.835984234	4.833748865	4.834284959	4.759103891			5.072526028	4.832073274	4.762438758	4.759570873	4.834374933	4.680784654	4.892161979	4.837317508	4.96349495	4.9046537	4.75372934	4.763814935
ETV3	6.092171326	6.489674324	6.170313134	6.713087313	6.637078109	6.151160961	6.317489073	6.158836545	6.329312219	6.266623055	6.306520992	6.228519387			6.765398104	6.989753373	6.958673996	6.716949996	7.007304312	7.178288113	6.758067749	6.736679763	6.880229014	6.866023907	6.742740518	6.888802657
KLHL10	4.575802893	4.575083476	4.57319416	4.674165658	4.577072651	4.573786562	4.671909376	4.67214456	4.579910968	4.674375544	4.578681588	4.675030326			4.668742746	4.672986662	4.678036016	4.675451203	4.674894505	4.680784654	4.666349345	4.580875628	4.672468385	4.760185353	4.670186661	4.679276406
TM2D3	7.117060602	7.060923436	7.064791219	7.09374278	7.371435967	6.977759116	7.286364569	7.277794842	7.4342705	7.384912461	7.487763274	7.686082889			7.159488974	7.280589302	7.259162317	7.150669335	7.096090147	7.025953411	6.320781757	7.167106791	6.842332874	7.390379804	6.885510083	7.224014483
ZNF485	4.755210397	4.670696999	4.751893173	4.75814449	4.672976353	4.752646498	4.671909376	4.67214456	4.904942788	4.758377372	4.674819923	4.675030326			4.573378088	4.577081647	4.678036016	4.675451203	4.674894505	4.583887599	4.571289567	4.580875628	4.672468385	4.579715888	4.574638121	4.679276406
WDR17	4.575802893	4.575083476	4.57319416	4.674165658	4.577072651	4.573786562	4.671909376	4.67214456	4.579910968	4.674375544	4.674819923	4.578865217			4.573378088	4.577081647	4.678036016	4.579232538	4.578746679	4.583887599	4.571289567	4.67733381	4.576629343	4.676005019	4.670186661	4.679276406
MFSD6L	5.314877587	5.355059147	5.391097239	5.361437534	5.359251073	5.352324918	5.436220996	5.436673943	5.279684298	5.36182334	5.362640132	5.321164816			5.503592782	5.51210479	5.408993433	5.321918649	5.551189623	5.45329702	5.498788233	5.484342289	5.707839955	5.364818036	5.31248499	5.41132636
CDH23	5.021260339	5.02006822	5.016936974	4.902274621	4.96419236	4.959021888	4.962727433	5.022161454	5.083855234	5.025386996	5.026029397	5.02633355			5.072526028	5.078950039	5.086589317	4.9675898	5.184361414	5.034649503	4.892161979	5.08552719	4.900079099	5.027742458	4.960361946	4.97283973
ANKAR	4.671521376	4.670696999	4.668531973	4.75814449	4.756824857	4.752646498	4.755640931	4.831057292	4.760433352	4.674375544	4.674819923	4.675030326			4.752127066	4.756836295	4.762438758	4.759570873	4.758953191	4.765488247	4.892161979	4.837317508	4.756261215	4.760185353	4.82869499	4.763814935
MEGF11	4.575802893	4.575083476	4.57319416	4.674165658	4.577072651	4.573786562	4.576141497	4.576346741	4.579910968	4.674375544	4.674819923	4.578865217			4.668742746	4.577081647	4.581488511	4.579232538	4.578746679	4.583887599	4.749471072	4.67733381	4.576629343	4.579715888	4.574638121	4.679276406
GPR182	4.671521376	4.670696999	4.668531973	4.75814449	4.756824857	4.752646498	4.755640931	4.755901895	4.760433352	4.674375544	4.758870438	4.675030326			4.668742746	4.672986662	4.678036016	4.675451203	4.674894505	4.765488247	4.892161979	4.761659666	4.756261215	4.760185353	4.75372934	4.763814935
ESX1	4.830305409	4.897787478	4.826698385	4.75814449	4.756824857	4.895864666	4.755640931	4.899660188	4.760433352	4.758377372	4.834284959	4.759103891			4.895259013	4.832073274	4.907280352	4.903937406	4.903217362	4.765488247	4.892161979	4.837317508	4.900079099	4.8357146	4.75372934	4.763814935
FAM167A-AS1	4.755210397	4.829310755	4.826698385	4.75814449	4.832060837	4.752646498	4.671909376	4.755901895	4.760433352	4.758377372	4.674819923	4.834538784			4.826952719	4.832073274	4.762438758	4.835046512	4.834374933	4.974909316	4.824064554	4.97017379	4.96349495	4.8357146	4.82869499	4.763814935
DNAJC5G	5.226211339	5.355059147	5.266271351	5.183169958	5.181225517	5.22230402	5.226867339	5.022161454	5.028065533	5.133625759	5.134326058	5.134657618			5.266638909	5.078950039	5.139393123	5.08267923	5.277360745	5.193985542	5.170384704	5.188348072	5.358317046	5.279295022	5.127022547	4.908884374
WDR88	4.671521376	4.754295638	4.668531973	4.674165658	4.756824857	4.669210836	4.755640931	4.67214456	4.676228538	4.674375544	4.674819923	4.675030326			4.668742746	4.756836295	4.678036016	4.759570873	4.758953191	4.680784654	4.666349345	4.67733381	4.756261215	4.760185353	4.670186661	4.679276406
PRUNE2	4.575802893	4.670696999	4.751893173	4.674165658	4.756824857	4.669210836	4.671909376	4.67214456	4.760433352	4.57829376	4.674819923	4.675030326			4.668742746	4.672986662	4.678036016	4.675451203	4.758953191	4.680784654	4.892161979	4.67733381	4.672468385	4.676005019	4.75372934	4.582571142
MBD3L2	4.830305409	4.829310755	4.958089577	4.902274621	5.078934438	4.827517541	4.962727433	4.899660188	4.760433352	5.025386996	4.966723249	4.903393038			4.958379046	5.023379039	4.907280352	4.835046512	4.903217362	4.910834624	5.120970451	4.906372237	5.130619815	4.968349985	4.960361946	4.839660693
ADAMTSL1	4.755210397	4.670696999	4.751893173	4.75814449	4.756824857	4.752646498	4.671909376	4.831057292	4.760433352	4.758377372	4.834284959	4.759103891			4.752127066	4.832073274	4.762438758	4.759570873	4.758953191	4.765488247	4.824064554	4.837317508	4.756261215	4.968349985	4.670186661	4.763814935
MBD3L1	4.575802893	4.575083476	4.668531973	4.674165658	4.577072651	4.669210836	4.671909376	4.67214456	4.579910968	4.57829376	4.578681588	4.578865217			4.573378088	4.672986662	4.678036016	4.579232538	4.674894505	4.583887599	4.666349345	4.580875628	4.576629343	4.676005019	4.574638121	4.582571142
TENT5D	4.575802893	4.575083476	4.57319416	4.578110585	4.577072651	4.573786562	4.671909376	4.67214456	4.676228538	4.57829376	4.578681588	4.578865217			4.668742746	4.672986662	4.581488511	4.579232538	4.578746679	4.583887599	4.571289567	4.580875628	4.576629343	4.579715888	4.574638121	4.582571142
SERPINB11	4.671521376	4.670696999	4.751893173	4.674165658	4.672976353	4.669210836	4.671909376	4.67214456	4.676228538	4.674375544	4.674819923	4.675030326			4.668742746	4.756836295	4.678036016	4.579232538	4.674894505	4.680784654	4.666349345	4.67733381	4.672468385	4.676005019	4.670186661	4.679276406
LINC00161	4.671521376	4.670696999	4.668531973	4.578110585	4.672976353	4.669210836	4.671909376	4.67214456	4.579910968	4.57829376	4.674819923	4.578865217			4.668742746	4.672986662	4.581488511	4.579232538	4.674894505	4.680784654	4.571289567	4.67733381	4.672468385	4.676005019	4.75372934	4.582571142
DSCR10	6.135885392	6.155050656	6.128114271	6.205840851	6.050608221	6.272102913	6.240242599	6.093767116	5.987547058	6.099476133	6.207571398	5.984604144			6.270831711	6.202720906	6.108830058	6.102226549	6.207768632	6.181376654	6.339082714	6.274582408	6.31902089	6.12576465	6.066358242	5.945092732
ABHD11	4.755210397	4.829310755	4.894986292	4.833495658	4.900736207	4.827517541	4.830773541	4.831057292	4.968656783	4.758377372	4.758870438	4.759103891			4.895259013	4.756836295	4.762438758	4.903937406	4.758953191	4.910834624	4.749471072	4.761659666	4.756261215	4.760185353	4.75372934	4.839660693
ACAP2	6.760410859	6.489674324	6.608981812	6.795334191	6.479626591	6.549640469	6.25997806	6.31813359	6.455030777	6.532837035	6.715053614	6.518511003			6.964709436	7.232862043	7.138142725	6.876965104	7.106804103	7.45808512	6.731058002	7.071255033	6.693801425	7.203360553	6.980862287	7.243761035
GAMT	6.278372961	6.351143	6.190915493	6.205840851	6.262854066	6.382971092	6.317489073	6.220836038	6.081704959	6.206396067	6.380721838	6.144992553			6.450779436	6.301528633	6.13098991	6.249728378	6.306723988	6.202515408	6.409892316	6.475208849	6.543325105	6.058237659	5.897652036	5.995026023
PLCD3	4.962194691	4.897787478	4.826698385	4.965825102	4.96419236	4.827517541	4.962727433	4.963050343	4.835984234	4.902546106	4.966723249	5.02633355			4.826952719	4.964206513	4.907280352	4.835046512	5.026137212	4.910834624	4.95509176	4.906372237	5.078165685	5.027742458	4.82869499	4.839660693
IRF6	4.575802893	4.670696999	4.668531973	4.674165658	4.672976353	4.669210836	4.671909376	4.67214456	4.579910968	4.758377372	4.578681588	4.578865217			4.573378088	4.672986662	4.581488511	4.675451203	4.674894505	4.680784654	4.666349345	4.67733381	4.672468385	4.676005019	4.75372934	4.679276406
PTPRC	6.000068735	6.439372428	6.211201207	6.266057868	6.282317254	6.501750108	6.115211934	6.31813359	6.616562332	6.699520336	6.451048294	6.416932181			6.5003993	6.831065892	6.460136007	6.079732911	6.566198069	6.855034018	5.938797118	6.708376398	6.664994886	6.600587097	6.437925168	6.625502597
MAN1A2	4.830305409	4.754295638	4.751893173	4.75814449	4.756824857	4.752646498	4.830773541	4.831057292	4.835984234	4.833748865	4.758870438	4.759103891			4.826952719	4.832073274	4.907280352	4.835046512	4.834374933	4.841479839	4.824064554	4.837317508	4.96349495	4.760185353	4.960361946	4.839660693
RAPH1	4.671521376	4.754295638	4.668531973	4.674165658	4.756824857	4.752646498	4.671909376	4.67214456	4.760433352	4.674375544	4.758870438	4.759103891			4.752127066	4.756836295	4.678036016	4.759570873	4.834374933	4.680784654	4.749471072	4.761659666	4.672468385	4.8357146	4.82869499	4.839660693
SMCR8	5.271483177	5.224817412	5.266271351	5.319615918	5.438275719	5.352324918	5.272159431	5.315994494	5.323310776	5.36182334	5.32078794	5.403337706			5.35146356	5.51210479	5.448012409	5.321918649	5.277360745	5.45329702	5.347058047	5.281608998	5.546237355	5.322910499	5.074712018	5.284990894
LACTB	5.643777661	6.044859365	6.270259205	6.266057868	6.282317254	6.129880015	6.158221642	6.071336163	6.104213286	6.143294316	6.398649606	6.03249082			6.532501779	6.637108646	6.442854701	6.486688319	6.501710728	6.732938957	6.078909032	6.193466193	6.072159043	6.401955633	6.672642262	6.428819735
BNC1	4.575802893	4.575083476	4.57319416	4.674165658	4.577072651	4.573786562	4.671909376	4.576346741	4.579910968	4.57829376	4.578681588	4.578865217			4.668742746	4.577081647	4.581488511	4.579232538	4.578746679	4.583887599	4.571289567	4.580875628	4.576629343	4.676005019	4.670186661	4.679276406
MPP4	4.575802893	4.575083476	4.57319416	4.578110585	4.672976353	4.573786562	4.576141497	4.576346741	4.579910968	4.57829376	4.578681588	4.675030326			4.573378088	4.577081647	4.678036016	4.579232538	4.578746679	4.583887599	4.571289567	4.580875628	4.576629343	4.676005019	4.574638121	4.582571142
AFG1L	4.755210397	4.754295638	4.751893173	4.75814449	4.672976353	4.827517541	4.830773541	4.831057292	4.760433352	4.758377372	4.758870438	4.675030326			4.752127066	4.756836295	4.762438758	4.835046512	4.758953191	4.680784654	4.749471072	4.761659666	4.831447986	4.676005019	4.82869499	4.763814935
IDI2	5.021260339	5.02006822	4.958089577	4.965825102	4.96419236	4.895864666	4.899355941	4.899660188	4.904942788	5.025386996	4.966723249	4.834538784			5.01724184	4.964206513	4.971137515	4.9675898	4.903217362	4.974909316	4.892161979	5.029663003	5.078165685	4.968349985	5.074712018	4.908884374
CYP11B1	4.898853994	4.897787478	4.894986292	4.833495658	4.832060837	4.895864666	4.899355941	4.831057292	4.835984234	4.902546106	4.834284959	4.834538784			4.826952719	4.900749543	4.838164539	4.835046512	4.758953191	4.910834624	4.892161979	4.906372237	4.96349495	4.9046537	4.75372934	4.839660693
TAF8	4.898853994	4.961062731	5.016936974	4.965825102	5.023364134	4.959021888	5.021821388	4.899660188	4.904942788	4.966113228	4.903120894	5.02633355			5.01724184	5.078950039	5.030677827	4.9675898	5.026137212	4.974909316	4.892161979	5.029663003	5.078165685	4.968349985	4.82869499	4.908884374
COBL	4.671521376	4.754295638	4.668531973	4.674165658	4.756824857	4.669210836	4.755640931	4.755901895	4.760433352	4.758377372	4.758870438	4.675030326			4.668742746	4.756836295	4.762438758	4.675451203	4.674894505	4.765488247	4.824064554	4.761659666	4.831447986	4.760185353	4.75372934	4.839660693
SLAMF6	7.859693142	7.780088429	7.311859267	7.444192562	7.481491938	7.34995477	7.199896087	7.518803712	7.690243312	7.662361632	7.412430405	7.560025208			6.90542961	6.831065892	6.958673996	7.25066067	7.229392553	6.991044792	7.220575431	7.471602899	7.221414392	7.077975862	6.945862987	7.183673167
ZSCAN20	5.076732377	5.02006822	5.016936974	4.902274621	5.023364134	4.895864666	5.129738602	4.963050343	4.904942788	4.902546106	5.026029397	4.903393038			5.174301141	5.078950039	5.030677827	4.9675898	5.081836958	4.974909316	5.013779632	4.97017379	5.078165685	4.968349985	5.019330183	4.97283973
GPBAR1	6.572000645	6.645093489	7.198646317	7.004990723	7.252112672	6.806451654	6.70629957	6.762308566	6.801634471	7.017064169	6.983965618	6.837360505			7.07623412	7.213310461	6.897525507	6.79926149	6.810812697	6.880769296	6.968645855	6.956472584	6.953065957	6.690040551	7.123177538	7.043967171
RHBDL2	4.575802893	4.670696999	4.57319416	4.674165658	4.672976353	4.669210836	4.671909376	4.576346741	4.579910968	4.674375544	4.674819923	4.578865217			4.668742746	4.577081647	4.581488511	4.675451203	4.674894505	4.680784654	4.666349345	4.67733381	4.672468385	4.676005019	4.670186661	4.763814935
FRAS1	5.129126928	5.02006822	5.221155733	5.133294986	5.078934438	5.267455142	5.077319638	5.07767559	5.028065533	5.081051734	5.026029397	5.134657618			5.124745594	5.274036814	5.237220415	5.185271371	5.231913008	5.090745993	5.386982099	5.236034308	5.511065785	5.083517091	5.074712018	5.03247027
BRSK1	4.962194691	4.897787478	4.894986292	4.965825102	5.023364134	4.959021888	4.962727433	5.022161454	4.904942788	5.025386996	5.026029397	4.967012072			5.174301141	5.078950039	4.971137515	5.026941938	5.026137212	5.034649503	5.013779632	4.906372237	4.96349495	5.027742458	4.960361946	4.908884374
CRB2	4.830305409	4.670696999	4.751893173	4.833495658	4.900736207	4.752646498	4.830773541	4.755901895	4.760433352	4.833748865	4.758870438	4.759103891			4.826952719	4.964206513	4.762438758	4.759570873	4.834374933	4.765488247	4.824064554	4.906372237	4.900079099	4.8357146	4.75372934	4.763814935
KCNE4	4.830305409	4.897787478	4.958089577	4.75814449	4.900736207	4.895864666	4.962727433	4.831057292	4.760433352	4.833748865	4.903120894	4.903393038			4.895259013	5.078950039	4.907280352	4.835046512	4.966825629	4.910834624	4.95509176	4.97017379	5.02262968	4.968349985	4.82869499	4.839660693
CD300LG	4.671521376	4.754295638	4.668531973	4.75814449	4.672976353	4.827517541	4.755640931	4.755901895	4.676228538	4.758377372	4.758870438	4.759103891			4.826952719	4.900749543	4.678036016	4.759570873	4.758953191	4.765488247	4.749471072	4.837317508	4.900079099	4.676005019	4.75372934	4.679276406
SLC34A3	7.247302345	7.31000297	7.365240897	7.321573419	7.326724333	7.393494478	7.609954193	7.323946614	7.204090929	7.410933649	7.229147537	7.18004545			7.538416459	7.529582889	7.506818116	7.388522477	7.463346265	7.397566576	7.322538424	7.437994021	7.662920095	7.290588985	7.335432149	7.120911443
CPA6	4.575802893	4.575083476	4.57319416	4.578110585	4.672976353	4.573786562	4.576141497	4.576346741	4.579910968	4.57829376	4.578681588	4.578865217			4.668742746	4.577081647	4.678036016	4.579232538	4.578746679	4.583887599	4.666349345	4.580875628	4.576629343	4.579715888	4.574638121	4.582571142
WBP2NL	4.755210397	4.754295638	4.668531973	4.902274621	4.756824857	4.827517541	4.830773541	4.831057292	4.835984234	4.758377372	4.758870438	4.675030326			4.752127066	4.672986662	4.762438758	4.759570873	4.758953191	4.765488247	4.749471072	4.67733381	4.672468385	4.676005019	4.82869499	4.679276406
HIPK1	4.755210397	4.829310755	4.751893173	4.75814449	4.832060837	4.827517541	4.830773541	4.755901895	4.760433352	4.833748865	4.903120894	4.759103891			4.826952719	4.832073274	4.838164539	4.759570873	4.758953191	4.841479839	4.749471072	4.761659666	4.756261215	4.760185353	4.670186661	4.763814935
MTBP	4.898853994	4.754295638	4.826698385	4.75814449	4.832060837	4.827517541	4.755640931	4.755901895	4.760433352	4.758377372	4.758870438	4.759103891			4.752127066	4.756836295	4.762438758	4.759570873	4.674894505	4.841479839	4.749471072	4.67733381	4.672468385	4.760185353	4.897127216	4.763814935
ACVR1C	5.611543697	5.177497987	5.757932629	5.230681282	5.708960548	5.573603287	5.077319638	5.474144933	5.234167106	5.319991913	5.081724113	5.58569397			5.35146356	5.228688517	5.48572119	5.552325511	5.44196831	5.491116316	5.632675277	5.236034308	5.613543597	5.083517091	5.354120326	5.370827271
TMEM74	4.671521376	4.754295638	4.751893173	4.674165658	4.756824857	4.669210836	4.755640931	4.67214456	4.760433352	4.758377372	4.758870438	4.675030326			4.752127066	4.756836295	4.762438758	4.759570873	4.834374933	4.841479839	4.749471072	4.761659666	4.756261215	4.9046537	4.897127216	4.679276406
TIGD4	4.575802893	4.575083476	4.57319416	4.578110585	4.577072651	4.573786562	4.576141497	4.576346741	4.579910968	4.57829376	4.578681588	4.578865217			4.573378088	4.577081647	4.581488511	4.579232538	4.578746679	4.583887599	4.571289567	4.580875628	4.576629343	4.579715888	4.574638121	4.582571142
ART5	5.396730309	5.355059147	5.391097239	5.361437534	5.399470662	5.431022032	5.473682467	5.474144933	5.365228746	5.478530615	5.402941657	5.403337706			5.467453006	5.438295569	5.48572119	5.363800328	5.479550448	5.287615833	5.567650881	5.446661785	5.546237355	5.405172167	5.394215697	5.328767218
FAM71C	4.898853994	5.02006822	4.894986292	4.902274621	4.900736207	4.895864666	4.830773541	4.899660188	4.835984234	4.966113228	4.966723249	5.02633355			4.895259013	5.078950039	4.971137515	4.835046512	5.081836958	5.034649503	4.95509176	4.97017379	4.96349495	4.968349985	4.897127216	4.908884374
LINC01547	5.735584141	5.924394797	6.06214768	5.932771834	5.796486919	5.994331672	6.093164936	5.952942608	6.035483694	6.07700285	5.882587162	5.909236417			5.969136281	6.223079328	5.942104818	6.009813061	5.828775524	5.896680893	5.938797118	6.038242996	5.953732007	6.103642086	5.845029945	5.866309455
NLRP11	4.671521376	4.754295638	4.826698385	4.674165658	4.756824857	4.752646498	4.755640931	4.755901895	4.760433352	4.758377372	4.758870438	4.759103891			4.752127066	4.756836295	4.762438758	4.675451203	4.758953191	4.841479839	4.824064554	4.761659666	4.831447986	4.760185353	4.75372934	4.763814935
ATP6V1C2	4.575802893	4.575083476	4.57319416	4.674165658	4.577072651	4.573786562	4.576141497	4.576346741	4.676228538	4.674375544	4.674819923	4.675030326			4.573378088	4.577081647	4.581488511	4.579232538	4.578746679	4.583887599	4.666349345	4.580875628	4.576629343	4.676005019	4.670186661	4.679276406
CLDN19	5.356575472	5.270046201	5.351075678	5.361437534	5.317485076	5.468374146	5.315573	5.397904141	5.279684298	5.402105126	5.362640132	5.363026837			5.430119888	5.359270028	5.408993433	5.232853712	5.44196831	5.414162219	5.386982099	5.367259387	5.474781659	5.279295022	5.354120326	5.284990894
VTI1A	5.874778949	6.216977549	5.919160025	6.431963689	6.243102064	6.041107813	5.644609838	6.240873023	6.190564465	6.185696055	6.122713313	6.03249082			5.758410422	6.262881846	6.334251523	6.486688319	6.122905396	6.48498582	6.056588734	6.014475155	6.116653492	6.231111893	6.153715287	6.318635961
KIF6	4.671521376	4.754295638	4.668531973	4.75814449	4.672976353	4.669210836	4.671909376	4.67214456	4.760433352	4.674375544	4.674819923	4.675030326			4.668742746	4.672986662	4.678036016	4.759570873	4.674894505	4.765488247	4.749471072	4.67733381	4.756261215	4.760185353	4.670186661	4.679276406
IQCD	5.314877587	5.395177263	5.266271351	5.230681282	5.181225517	5.22230402	5.272159431	5.17986539	5.234167106	5.133625759	5.231786974	5.082042457			5.124745594	5.274036814	5.086589317	5.185271371	5.184361414	5.287615833	5.217463012	5.281608998	5.273133659	5.553455349	5.223954398	5.191521938
TAGAP	6.985102935	6.874710966	6.817312663	6.98189685	6.930801624	6.806451654	6.865974611	6.802382175	6.841046721	6.795975631	6.849595407	6.85024461			7.365952203	7.481527035	7.388388632	7.119235112	7.360141088	7.713113706	7.267835346	7.512526261	7.495958429	7.424993841	6.969292833	7.301397833
STON2	4.830305409	4.829310755	4.894986292	4.965825102	4.900736207	4.827517541	4.899355941	5.022161454	4.904942788	4.758377372	4.834284959	4.834538784			4.895259013	4.900749543	5.030677827	4.903937406	5.081836958	4.910834624	4.95509176	4.97017379	5.02262968	4.968349985	4.960361946	4.839660693
SERPINA12	4.755210397	4.829310755	4.751893173	4.75814449	4.756824857	4.752646498	4.755640931	4.831057292	4.760433352	4.758377372	4.758870438	4.834538784			4.752127066	4.900749543	4.762438758	4.759570873	4.834374933	4.765488247	4.749471072	4.837317508	4.756261215	4.760185353	4.75372934	4.763814935
LETM2	4.671521376	4.754295638	4.668531973	4.75814449	4.672976353	4.669210836	4.576141497	4.67214456	4.760433352	4.833748865	4.674819923	4.759103891			4.826952719	4.756836295	4.762438758	4.759570873	4.966825629	5.090745993	4.666349345	4.761659666	4.831447986	4.9046537	4.75372934	4.97283973
BSND	4.671521376	4.754295638	4.751893173	4.674165658	4.832060837	4.752646498	4.755640931	4.67214456	4.760433352	4.758377372	4.834284959	4.675030326			4.752127066	5.023379039	4.678036016	4.759570873	4.834374933	4.765488247	4.824064554	4.837317508	4.756261215	4.8357146	4.670186661	4.679276406
CLEC4C	5.396730309	5.224817412	5.266271351	4.965825102	5.131420513	5.073234723	5.226867339	5.545576107	5.775356658	5.276456696	5.585257181	4.967012072			5.605672533	5.359270028	5.237220415	5.232853712	5.081836958	5.563199189	4.95509176	5.236034308	5.130619815	5.774851309	4.82869499	5.488156325
NLRC4	6.135885392	6.021653618	6.710121314	6.564078167	6.479626591	6.108247525	6.408175629	6.280062731	6.60124119	6.595815799	6.912279659	6.757441861			6.308802746	6.56064688	6.256639854	6.033542263	6.055441421	6.223321412	5.96323731	6.214215272	6.221698798	6.827347356	7.204099701	6.742519494
PRSS36	5.178846269	5.313399888	5.221155733	5.230681282	5.181225517	5.352324918	5.315573	5.07767559	5.234167106	5.231035996	5.277230825	5.082042457			5.391494528	5.359270028	5.326546993	5.232853712	5.277360745	5.414162219	5.386982099	5.281608998	5.398514037	5.083517091	5.223954398	5.141346844
ZDHHC15	4.575802893	4.670696999	4.668531973	4.674165658	4.577072651	4.573786562	4.671909376	4.67214456	4.579910968	4.57829376	4.578681588	4.578865217			4.573378088	4.577081647	4.678036016	4.579232538	4.674894505	4.680784654	4.666349345	4.580875628	4.672468385	4.579715888	4.75372934	4.679276406
RAI1	5.472919445	5.471298024	5.467038197	5.478118123	5.581428876	5.392376773	5.545095828	5.397904141	5.279684298	5.51488844	5.402941657	5.363026837			5.503592782	5.61463786	5.368549262	5.51704363	5.585412013	5.414162219	5.600611481	5.484342289	5.546237355	5.481732331	5.394215697	5.328767218
CDK15	4.830305409	4.829310755	4.958089577	4.833495658	4.96419236	4.827517541	4.830773541	4.831057292	4.835984234	4.833748865	4.834284959	4.903393038			4.895259013	4.964206513	4.762438758	4.903937406	5.026137212	4.910834624	4.95509176	4.97017379	5.02262968	4.9046537	4.960361946	4.839660693
ZNF570	5.314877587	4.961062731	5.072206902	4.902274621	5.023364134	5.017918872	5.021821388	4.963050343	5.083855234	5.133625759	4.966723249	5.082042457			4.958379046	4.900749543	5.139393123	4.9675898	5.026137212	4.910834624	5.217463012	5.029663003	5.02262968	4.9046537	4.897127216	5.03247027
NUDT9P1	4.830305409	4.754295638	4.826698385	4.75814449	4.832060837	4.752646498	4.830773541	4.755901895	4.676228538	4.758377372	4.758870438	4.759103891			4.752127066	4.756836295	4.762438758	4.759570873	4.758953191	4.765488247	4.749471072	4.67733381	4.756261215	4.8357146	4.82869499	4.763814935
BTBD16	4.671521376	4.670696999	4.751893173	4.674165658	4.756824857	4.669210836	4.755640931	4.67214456	4.760433352	4.674375544	4.758870438	4.675030326			4.752127066	4.672986662	4.762438758	4.759570873	4.758953191	4.841479839	4.824064554	4.761659666	4.756261215	4.676005019	4.670186661	4.679276406
RTP3	5.076732377	4.961062731	5.016936974	4.902274621	5.078934438	5.017918872	5.021821388	5.022161454	4.968656783	4.966113228	4.903120894	4.967012072			5.072526028	5.078950039	4.971137515	5.026941938	5.026137212	5.034649503	5.217463012	5.029663003	5.227812396	5.027742458	4.897127216	4.97283973
TSPEAR	4.671521376	4.670696999	4.751893173	4.674165658	4.672976353	4.752646498	4.671909376	4.755901895	4.676228538	4.674375544	4.674819923	4.675030326			4.752127066	4.756836295	4.762438758	4.675451203	4.758953191	4.765488247	4.749471072	4.761659666	4.672468385	4.676005019	4.670186661	4.679276406
MIPOL1	4.575802893	4.575083476	4.57319416	4.578110585	4.577072651	4.573786562	4.576141497	4.576346741	4.579910968	4.57829376	4.578681588	4.578865217			4.573378088	4.577081647	4.581488511	4.579232538	4.578746679	4.583887599	4.571289567	4.580875628	4.576629343	4.676005019	4.574638121	4.582571142
C6orf141	4.671521376	4.670696999	4.668531973	4.674165658	4.672976353	4.669210836	4.671909376	4.755901895	4.676228538	4.674375544	4.674819923	4.675030326			4.668742746	4.577081647	4.678036016	4.675451203	4.674894505	4.680784654	4.666349345	4.67733381	4.756261215	4.676005019	4.670186661	4.679276406
ALMS1P1	4.962194691	5.02006822	5.016936974	4.965825102	5.078934438	5.017918872	5.021821388	5.07767559	4.968656783	4.966113228	4.966723249	4.967012072			5.01724184	4.964206513	5.086589317	5.026941938	5.081836958	5.034649503	5.120970451	5.13828695	5.227812396	4.9046537	4.897127216	5.088465276
MYO3B	4.755210397	4.670696999	4.668531973	4.578110585	4.577072651	4.669210836	4.671909376	4.67214456	4.676228538	4.674375544	4.674819923	4.675030326			4.668742746	4.577081647	4.678036016	4.579232538	4.674894505	4.583887599	4.666349345	4.67733381	4.576629343	4.579715888	4.574638121	4.582571142
ADAM21	4.755210397	4.897787478	5.016936974	4.833495658	4.96419236	5.017918872	4.899355941	4.899660188	4.904942788	5.025386996	4.966723249	4.834538784			4.895259013	4.964206513	4.971137515	5.026941938	5.026137212	4.974909316	5.386982099	4.97017379	5.02262968	4.9046537	5.074712018	4.908884374
TRIML2	4.830305409	4.829310755	4.826698385	4.833495658	4.832060837	4.752646498	4.830773541	4.755901895	4.835984234	4.758377372	4.834284959	4.834538784			4.826952719	4.900749543	4.838164539	4.759570873	4.834374933	4.841479839	4.892161979	4.761659666	4.900079099	4.9046537	4.82869499	4.839660693
ABCC13	4.671521376	4.670696999	4.57319416	4.674165658	4.577072651	4.573786562	4.671909376	4.576346741	4.676228538	4.57829376	4.578681588	4.675030326			4.668742746	4.672986662	4.678036016	4.675451203	4.758953191	4.583887599	4.666349345	4.67733381	4.672468385	4.579715888	4.670186661	4.582571142
IL12RB1	8.732200605	8.855503843	8.238563008	8.390586417	8.685921045	8.646962291	8.424890876	8.404603614	8.498545881	8.789645428	8.317435221	8.65803802			8.200929079	8.034932786	8.254198441	8.547232778	8.401905766	8.101149932	8.555403187	8.15203753	8.397249153	8.481471281	8.692881676	8.497628151
GTF2A1L	4.575802893	4.575083476	4.668531973	4.674165658	4.672976353	4.669210836	4.671909376	4.67214456	4.676228538	4.674375544	4.674819923	4.578865217			4.573378088	4.672986662	4.678036016	4.579232538	4.674894505	4.680784654	4.666349345	4.67733381	4.756261215	4.676005019	4.574638121	4.582571142
TRPV3	5.076732377	4.897787478	5.124413185	4.902274621	5.078934438	5.175066943	5.129738602	5.022161454	5.083855234	5.081051734	5.081724113	5.082042457			5.174301141	5.274036814	4.971137515	5.135320824	5.277360745	5.143722048	5.068901814	5.13828695	5.227812396	4.968349985	4.960361946	4.97283973
CNBD1	4.671521376	4.670696999	4.668531973	4.674165658	4.577072651	4.669210836	4.671909376	4.67214456	4.676228538	4.57829376	4.674819923	4.675030326			4.573378088	4.672986662	4.678036016	4.579232538	4.674894505	4.680784654	4.666349345	4.580875628	4.672468385	4.579715888	4.75372934	4.679276406
ABCC12	4.575802893	4.575083476	4.57319416	4.674165658	4.672976353	4.669210836	4.576141497	4.576346741	4.579910968	4.57829376	4.578681588	4.675030326			4.668742746	4.672986662	4.581488511	4.675451203	4.578746679	4.680784654	4.571289567	4.67733381	4.576629343	4.579715888	4.574638121	4.582571142
MMP21	4.671521376	4.575083476	4.668531973	4.674165658	4.577072651	4.573786562	4.576141497	4.576346741	4.676228538	4.674375544	4.578681588	4.578865217			4.573378088	4.672986662	4.581488511	4.675451203	4.578746679	4.583887599	4.666349345	4.580875628	4.672468385	4.579715888	4.574638121	4.679276406
TMEM190	5.271483177	5.433885652	5.503169792	5.478118123	5.359251073	5.468374146	5.357289055	5.436673943	5.323310776	5.402105126	5.441824765	5.277597336			5.605672533	5.399490075	5.408993433	5.363800328	5.403082047	5.414162219	5.425505584	5.520814175	5.358317046	5.322910499	5.354120326	5.370827271
GAS2L2	5.544303408	5.54261949	5.605226979	5.514467843	5.399470662	5.539582822	5.545095828	5.676519456	5.444535456	5.51488844	5.479403892	5.58569397			5.538626124	5.581450289	5.591930826	5.552325511	5.618664536	5.414162219	5.632675277	5.520814175	5.677224081	5.587717059	5.31248499	5.284990894
KCNG4	4.962194691	5.075484552	5.124413185	4.902274621	4.832060837	5.017918872	4.899355941	4.831057292	4.835984234	4.902546106	4.834284959	4.903393038			5.072526028	4.900749543	4.907280352	4.835046512	4.966825629	4.765488247	4.824064554	5.08552719	5.02262968	4.9046537	4.897127216	4.839660693
PXT1	4.755210397	4.754295638	4.751893173	4.833495658	4.756824857	4.752646498	4.830773541	4.755901895	4.760433352	4.758377372	4.758870438	4.759103891			4.826952719	4.832073274	4.762438758	4.759570873	4.758953191	4.841479839	4.824064554	4.761659666	4.96349495	4.760185353	4.75372934	4.763814935
CACNG5	5.021260339	5.02006822	5.016936974	5.08073415	5.078934438	4.959021888	4.962727433	4.963050343	4.968656783	4.966113228	4.966723249	4.967012072			5.01724184	5.023379039	4.971137515	4.9675898	5.081836958	5.034649503	5.120970451	4.906372237	5.02262968	4.968349985	4.960361946	4.97283973
LINC00308	4.898853994	4.897787478	4.958089577	4.965825102	5.023364134	4.895864666	4.962727433	4.963050343	4.760433352	4.758377372	4.903120894	4.903393038			4.895259013	4.900749543	4.907280352	4.903937406	4.834374933	4.910834624	4.95509176	4.906372237	5.078165685	4.968349985	4.82869499	4.908884374
WFDC11	4.671521376	4.670696999	4.751893173	4.674165658	4.756824857	4.895864666	4.671909376	4.67214456	4.676228538	4.674375544	4.674819923	4.675030326			4.752127066	4.756836295	4.678036016	4.759570873	4.758953191	4.680784654	4.666349345	4.761659666	4.831447986	4.760185353	4.670186661	4.679276406
JAK1	8.877134974	8.788817459	8.633649976	8.416329984	8.72406079	8.713278875	8.624578574	8.538815845	8.629709145	8.577872105	8.477086415	8.932726068			8.673492639	8.441429172	8.658402132	8.491624117	8.874508335	8.780465236	8.732808369	8.648503203	8.762630718	8.721675887	8.890325737	8.969480213
CDC42SE2	8.12583102	7.856765204	7.791987277	7.675965384	7.700057473	7.585700989	7.525892478	7.573168646	7.718363854	7.655140794	7.446405834	7.480301879			7.856018613	7.657541126	7.907477205	7.916583426	7.938586999	7.886174451	7.931560543	7.796828905	7.712189026	7.91248846	7.778287838	7.90571474
ACACB	5.848159234	5.949412514	6.231180609	6.164117864	6.182016899	6.108247525	6.001031565	6.093767116	6.126339959	6.185696055	6.165826379	6.208127795			6.345725648	6.262881846	6.174216609	6.289019163	6.207768632	6.263979012	6.556848463	6.084507731	6.241740928	5.96234635	6.088751925	5.919372936
COP1	7.237699509	6.970911566	7.347669535	7.256040245	7.079123882	7.045203867	6.974754528	7.097925264	7.153190751	7.376131573	7.479587512	7.387110382			7.339510308	7.553015445	7.473976393	7.119235112	7.463346265	7.867242568	7.295451176	7.628675897	7.404503257	7.977783756	7.447359642	8.006751794
STX6	6.297534729	6.439372428	6.326809626	6.49962299	6.479626591	6.517901111	6.525711135	6.408836053	6.488904154	6.516628181	6.597117496	6.434399002			6.609605895	6.445860183	6.510698635	6.400410952	6.416551438	6.48498582	6.357137438	6.332333192	6.31902089	6.569426176	6.488208792	6.4463398
ANLN	4.671521376	4.670696999	4.57319416	4.674165658	4.756824857	4.669210836	4.576141497	4.755901895	4.676228538	4.674375544	4.674819923	4.675030326			4.668742746	4.672986662	4.678036016	4.579232538	4.674894505	4.680784654	4.571289567	4.67733381	4.672468385	4.760185353	4.75372934	4.679276406
SPRR4	5.793153127	5.846226641	5.944128742	5.827087701	5.796486919	5.970289261	6.001031565	5.736977583	5.775356658	5.854845552	5.934350579	5.856378445			5.993168695	5.954995204	5.890190414	5.830064383	6.00843371	6.070256365	5.987218498	5.940412629	6.28094056	5.831346305	5.897652036	5.782243552
HSH2D	6.258931807	6.585025967	6.345141007	6.670053678	6.804933967	6.252696868	6.573135306	6.54238538	6.585747008	6.699520336	6.972270153	6.863010571			6.724622549	6.591744994	6.710475936	6.308238935	6.657569177	7.025953411	6.339082714	6.870128484	7.151288076	7.372750865	6.437925168	7.120911443
TRNT1	6.353426432	6.112084148	6.190915493	6.142749844	6.161010743	6.291230383	6.336122563	6.373285337	6.488904154	6.143294316	6.100612564	6.518511003			6.039925675	5.878248779	5.836045187	6.079732911	5.68250086	5.785648807	5.808958171	5.834420979	5.766850073	5.937209136	6.420740797	6.219343415
TMEM163	4.671521376	4.754295638	4.826698385	4.75814449	4.756824857	4.895864666	4.755640931	4.67214456	4.760433352	4.758377372	4.758870438	4.675030326			4.826952719	4.756836295	4.762438758	4.675451203	4.758953191	4.765488247	4.571289567	4.67733381	4.756261215	4.760185353	4.670186661	4.679276406
ARHGAP5	4.962194691	5.02006822	4.894986292	4.965825102	4.96419236	4.895864666	4.899355941	4.963050343	4.760433352	5.025386996	4.966723249	4.967012072			4.895259013	5.023379039	4.971137515	4.9675898	5.081836958	4.910834624	4.892161979	4.837317508	4.831447986	4.760185353	4.897127216	5.141346844
HERPUD2	9.330705255	9.405846304	9.027786135	8.944254616	9.101182349	9.008328198	8.917900503	8.97722766	9.089693968	9.183452474	8.931928719	9.010942165			9.036781043	9.262951455	9.209881444	9.30501254	9.265569858	9.242480762	9.114656903	9.381896104	9.173640091	9.243608961	8.881223227	9.021391386
JMJD6	4.898853994	4.897787478	4.826698385	4.902274621	4.832060837	4.895864666	4.899355941	4.831057292	4.904942788	4.902546106	5.081724113	4.903393038			5.01724184	4.900749543	5.030677827	4.9675898	4.966825629	4.910834624	5.013779632	4.97017379	5.130619815	5.027742458	4.897127216	4.908884374
SRCAP	5.314877587	5.313399888	5.266271351	5.276091045	5.228671091	5.267455142	5.179480794	5.315994494	5.136545634	5.231035996	5.277230825	5.277597336			5.391494528	5.317503549	5.282831612	5.232853712	5.081836958	5.287615833	5.262464373	5.236034308	5.273133659	5.444105384	5.432902416	5.239315252
MAP3K6	5.076732377	5.02006822	5.266271351	5.183169958	5.131420513	5.125483784	5.077319638	5.022161454	5.136545634	5.081051734	5.231786974	5.184583429			5.072526028	5.274036814	5.189495458	5.135320824	5.081836958	5.241861901	5.013779632	5.13828695	5.02262968	5.136193459	5.176663242	5.239315252
ARSG	5.975977077	5.973948374	6.039393295	5.854354113	6.073449602	6.172102548	5.736451746	5.766116955	5.962890351	5.958378963	6.055253575	6.05578349			5.969136281	5.76802324	6.086287647	6.146083846	6.055441421	6.115843193	5.533732514	5.990260354	5.795323212	6.231111893	6.066358242	6.299360124
ZNF101	6.889679621	6.797937669	6.842865093	6.872979312	6.856653483	6.726042909	6.788432582	6.841331787	6.964908623	6.62625198	6.770446032	6.715685762			6.710759194	6.695356297	6.807147091	6.83865567	6.91251247	6.518548226	6.68952774	6.664803082	6.559137696	6.631055875	6.215616543	6.610150852
PTPN11	4.671521376	4.670696999	4.668531973	4.674165658	4.672976353	4.669210836	4.671909376	4.67214456	4.676228538	4.758377372	4.674819923	4.675030326			4.752127066	4.672986662	4.678036016	4.675451203	4.758953191	4.680784654	4.666349345	4.67733381	4.672468385	4.676005019	4.574638121	4.679276406
KLHDC7B	5.509166926	5.576692866	5.309517974	5.276091045	5.512084125	5.504532086	5.473682467	5.22726495	5.234167106	5.319991913	5.441824765	5.321164816			5.266638909	5.317503549	5.448012409	5.480644295	5.44196831	5.45329702	5.170384704	5.556165515	5.546237355	5.233789464	5.176663242	5.41132636
ZNF626	5.643777661	5.872825925	5.668653729	5.680916057	5.738837013	5.573603287	5.644609838	5.794581246	5.685400618	5.649896911	5.71302594	5.856378445			5.637815193	5.904351439	5.890190414	5.714417451	5.959642808	5.756266266	5.72400799	5.718565495	5.90311196	5.587717059	5.761682624	5.782243552
PHC3	6.87727989	6.351143	6.211201207	6.164117864	6.182016899	6.272102913	6.179209544	6.071336163	6.058800298	6.164666009	6.207571398	6.399236727			6.548274146	6.479656029	6.55945194	6.418111817	6.362758453	6.093249137	6.010759339	6.475208849	6.201348807	6.347392239	6.312765424	6.318635961
IL11RA	6.23920237	5.872825925	6.170313134	6.121027989	6.117963088	6.272102913	6.298592608	6.137503957	6.190564465	6.07700285	5.855885919	6.144992553			6.016759318	6.027382459	6.195308885	6.009813061	6.248238598	5.973967849	6.010759339	6.107036912	6.28094056	5.937209136	5.897652036	6.066466624
TNFRSF10A	7.247302345	6.911567006	6.975598912	7.303157259	6.918713951	7.056136046	7.118319347	7.119082133	7.111104242	6.970867975	6.899966175	6.961138534			6.765398104	6.651903102	7.051273645	6.83865567	6.597335929	6.967279669	6.784560978	7.003519037	6.707982263	6.787564216	6.756343595	6.986305535
HPS4	6.000068735	5.819048866	5.944128742	5.881039214	6.050608221	5.895315453	5.952369224	5.822404948	5.912098629	5.799691225	5.828602833	5.801190191			5.868193585	5.878248779	5.863410027	5.935873456	5.618664536	5.785648807	5.862515434	5.888531134	5.953732007	5.653388047	5.817865245	5.752903276
UHMK1	5.675163238	5.673368755	5.786297964	5.649447106	5.851568653	5.759471391	5.545095828	5.474144933	5.136545634	5.649896911	5.682338706	5.618951112			5.786781544	5.581450289	5.808066406	6.009813061	5.800879291	5.631081863	5.632675277	5.687802188	5.795323212	5.444105384	5.702804075	5.594503102
TXNDC2	5.129126928	5.075484552	5.124413185	5.133294986	5.181225517	5.125483784	5.179480794	5.07767559	5.083855234	5.183513073	5.081724113	5.134657618			5.072526028	5.228688517	5.030677827	5.185271371	5.134443588	5.034649503	5.217463012	5.188348072	5.31657482	5.186176547	5.127022547	5.03247027
NAV3	4.575802893	4.575083476	4.668531973	4.674165658	4.672976353	4.669210836	4.671909376	4.67214456	4.676228538	4.57829376	4.674819923	4.759103891			4.573378088	4.756836295	4.678036016	4.579232538	4.834374933	4.680784654	4.749471072	4.67733381	4.672468385	4.760185353	5.074712018	4.679276406
C5orf22	5.356575472	5.313399888	5.173956297	5.230681282	5.181225517	5.073234723	5.129738602	5.13010935	5.136545634	5.025386996	5.184239499	5.232142525			5.266638909	5.078950039	5.189495458	5.27833044	5.184361414	5.143722048	5.120970451	5.08552719	5.31657482	5.279295022	5.176663242	5.239315252
PCDHGB7	4.575802893	4.575083476	4.57319416	4.578110585	4.577072651	4.573786562	4.576141497	4.576346741	4.579910968	4.57829376	4.578681588	4.578865217			4.668742746	4.577081647	4.581488511	4.579232538	4.578746679	4.583887599	4.571289567	4.580875628	4.576629343	4.579715888	4.574638121	4.679276406
ERC1	5.578406099	5.762838754	5.919160025	5.90717009	5.824332587	5.787855355	5.927324133	5.612859804	5.62147878	5.771166046	5.855885919	5.651299987			5.868193585	5.878248779	5.720112039	5.744366285	5.800879291	5.869833136	5.862515434	6.107036912	6.09459615	5.745602971	5.608724085	5.56012582
FLCN	6.424508367	6.369256879	6.381070056	6.516024494	6.528795482	6.501750108	6.47657878	6.35515187	6.291122331	6.483620352	6.612424426	6.381306193			6.231746613	6.591744994	6.352971141	6.452833487	6.228158023	6.397260316	6.320781757	6.475208849	6.159683089	6.471438642	6.293893915	6.514242606
JMJD1C-AS1	4.830305409	4.754295638	4.751893173	4.902274621	4.832060837	4.827517541	4.899355941	4.755901895	4.760433352	4.833748865	4.834284959	4.967012072			4.895259013	4.832073274	4.907280352	4.9675898	5.026137212	4.910834624	4.95509176	5.029663003	4.900079099	4.9046537	4.75372934	4.839660693
LRRC7	4.671521376	4.670696999	4.57319416	4.578110585	4.577072651	4.573786562	4.576141497	4.67214456	4.579910968	4.57829376	4.578681588	4.675030326			4.668742746	4.672986662	4.678036016	4.675451203	4.674894505	4.680784654	4.666349345	4.580875628	4.576629343	4.579715888	4.75372934	4.582571142
SH2D3C	6.719159669	6.674171052	6.710121314	6.65540544	6.737452003	6.753367539	6.603862372	6.721041481	6.719283997	6.656028638	6.534119878	6.657972273			6.696755323	6.544828718	6.666883324	6.772363908	6.581855462	6.718684447	6.443950877	6.679480988	6.62062287	6.987710199	6.70110988	7.00965548
PPP1R3B	4.830305409	4.829310755	4.894986292	4.833495658	4.832060837	4.827517541	4.830773541	4.831057292	4.835984234	4.902546106	4.758870438	4.834538784			4.895259013	4.756836295	4.907280352	4.835046512	4.834374933	4.910834624	5.068901814	4.906372237	4.96349495	4.8357146	4.75372934	4.839660693
SLC9A7	5.076732377	4.897787478	5.072206902	5.133294986	4.96419236	4.827517541	4.962727433	4.899660188	5.083855234	5.025386996	4.966723249	4.967012072			4.895259013	5.023379039	5.030677827	4.903937406	4.903217362	5.034649503	5.068901814	5.029663003	5.02262968	4.968349985	4.897127216	4.908884374
IGSF3	5.129126928	5.02006822	5.221155733	5.183169958	5.228671091	5.22230402	5.272159431	5.17986539	5.136545634	5.133625759	5.277230825	5.232142525			5.309895962	5.228688517	5.368549262	5.232853712	5.36277721	5.241861901	5.217463012	5.188348072	5.546237355	5.186176547	5.019330183	5.141346844
RFX6	4.671521376	4.670696999	4.668531973	4.674165658	4.672976353	4.669210836	4.671909376	4.67214456	4.676228538	4.674375544	4.674819923	4.759103891			4.668742746	4.756836295	4.678036016	4.675451203	4.674894505	4.583887599	4.824064554	4.761659666	4.672468385	4.676005019	4.670186661	4.679276406
DIRC1	4.575802893	4.575083476	4.57319416	4.578110585	4.577072651	4.669210836	4.576141497	4.67214456	4.579910968	4.57829376	4.578681588	4.578865217			4.573378088	4.577081647	4.581488511	4.579232538	4.578746679	4.583887599	4.666349345	4.580875628	4.576629343	4.579715888	4.670186661	4.582571142
DNAJB7	4.575802893	4.575083476	4.57319416	4.674165658	4.672976353	4.573786562	4.671909376	4.576346741	4.579910968	4.57829376	4.578681588	4.578865217			4.573378088	4.577081647	4.581488511	4.675451203	4.674894505	4.583887599	4.571289567	4.67733381	4.576629343	4.579715888	4.75372934	4.582571142
UCN3	4.830305409	4.829310755	4.894986292	4.833495658	4.832060837	4.895864666	4.755640931	4.831057292	4.835984234	4.833748865	4.758870438	4.903393038			4.826952719	4.832073274	4.907280352	4.835046512	4.903217362	4.910834624	4.824064554	4.906372237	4.96349495	4.8357146	4.82869499	4.763814935
DIP2A	6.961850612	7.263579027	6.326809626	6.98189685	6.428611998	6.291230383	6.25997806	6.928189314	6.988416071	7.285193815	6.380721838	7.18004545			6.251432797	5.929925829	6.696097529	6.382474886	6.715277703	6.732938957	6.033877295	6.254763176	6.138344816	6.103642086	6.195303756	6.318635961
USP28	6.178188287	6.112084148	5.757932629	5.799210667	5.95497008	5.815601397	5.736451746	5.676519456	6.011738524	6.266623055	6.00824889	6.344712606			5.572629907	5.67835167	5.779441691	5.773599022	5.743122928	5.563199189	5.632675277	5.940412629	5.978306672	5.831346305	5.761682624	5.782243552
KNL1	4.830305409	4.829310755	4.668531973	4.833495658	4.756824857	4.752646498	4.755640931	4.755901895	4.760433352	4.674375544	4.674819923	4.759103891			4.752127066	4.672986662	4.762438758	4.675451203	4.674894505	4.841479839	4.749471072	4.67733381	4.756261215	4.760185353	5.019330183	4.839660693
SENP8	4.755210397	4.670696999	4.826698385	4.75814449	4.756824857	4.752646498	4.755640931	4.899660188	4.904942788	4.758377372	4.758870438	4.834538784			4.752127066	4.756836295	4.838164539	4.759570873	4.834374933	4.910834624	4.749471072	4.761659666	4.756261215	4.760185353	4.75372934	4.763814935
GRHL1	5.076732377	4.961062731	5.309517974	5.08073415	4.900736207	4.959021888	5.129738602	5.07767559	5.028065533	4.902546106	5.231786974	5.277597336			4.958379046	5.023379039	5.086589317	4.903937406	5.026137212	4.974909316	5.013779632	5.029663003	5.02262968	5.027742458	5.176663242	4.908884374
CNBD2	4.830305409	4.829310755	4.826698385	4.833495658	4.900736207	4.752646498	4.755640931	4.831057292	4.760433352	4.833748865	4.834284959	4.759103891			4.895259013	4.832073274	4.838164539	4.835046512	4.903217362	5.034649503	4.95509176	4.837317508	4.900079099	4.8357146	4.75372934	4.839660693
CASKIN1	5.643777661	5.872825925	5.699149716	5.680916057	5.767999907	5.670132517	5.849068614	5.849619762	5.803932281	5.799691225	5.800708563	5.856378445			5.786781544	5.796510534	5.808066406	5.744366285	5.828775524	5.663618243	5.862515434	5.990260354	6.116653492	5.858659557	5.702804075	5.782243552
CACNA2D4	5.314877587	5.64200922	5.503169792	5.478118123	5.399470662	5.392376773	5.612363146	5.397904141	5.5539113	5.51488844	5.515778871	5.363026837			5.35146356	5.547295551	5.448012409	5.714417451	5.479550448	5.527720859	5.386982099	5.325289854	5.546237355	5.518153022	5.394215697	5.450397638
ARL11	5.820960356	5.395177263	5.919160025	6.121027989	5.796486919	5.730415168	5.794042325	5.849619762	5.885918494	5.958378963	6.186863999	5.934858193			6.016759318	6.243129684	6.039995332	5.802153498	6.032151466	6.360511157	5.600611481	6.107036912	5.90311196	6.309745581	5.817865245	6.393083749
SLC2A13	4.575802893	4.575083476	4.57319416	4.578110585	4.577072651	4.669210836	4.576141497	4.576346741	4.579910968	4.57829376	4.578681588	4.578865217			4.573378088	4.577081647	4.581488511	4.579232538	4.578746679	4.583887599	4.571289567	4.580875628	4.576629343	4.579715888	4.670186661	4.582571142
NIPA1	4.755210397	4.754295638	4.751893173	4.75814449	4.832060837	4.827517541	4.830773541	4.755901895	4.760433352	4.833748865	4.834284959	4.759103891			4.826952719	4.672986662	4.838164539	4.759570873	4.674894505	4.765488247	4.749471072	4.761659666	4.831447986	4.760185353	4.670186661	4.679276406
TUBA3FP	5.544303408	5.576692866	5.572191568	5.549702221	5.475780357	5.504532086	5.545095828	5.436673943	5.405592794	5.68137247	5.682338706	5.651299987			5.669112897	5.475800624	5.522220105	5.51704363	5.515928306	5.45329702	5.498788233	5.556165515	5.546237355	5.518153022	5.394215697	5.56012582
CARD16	8.191485354	8.227426002	8.943260685	8.920490499	8.668244819	8.187969714	8.466293263	8.434138973	8.680423159	8.906231389	8.820561414	8.650813806			9.069068448	9.190555381	9.077691418	8.597011837	8.920254072	9.425528076	8.607321517	9.248695432	9.009618445	9.204595474	9.069279634	9.071496319
DUSP19	4.575802893	4.575083476	4.57319416	4.578110585	4.577072651	4.669210836	4.576141497	4.576346741	4.676228538	4.674375544	4.578681588	4.578865217			4.573378088	4.577081647	4.581488511	4.675451203	4.578746679	4.583887599	4.571289567	4.580875628	4.576629343	4.579715888	4.670186661	4.582571142
CYB5D1	6.524589015	6.369256879	6.43322961	6.304739867	6.182016899	6.31008772	6.317489073	6.115818467	6.505529546	6.361323873	6.207571398	6.166375696			6.345725648	6.666540246	6.315266938	6.167474342	6.362758453	6.283851118	6.18512141	6.508691129	6.392082828	6.401955633	6.437925168	6.374854555
NMNAT2	4.755210397	4.754295638	4.751893173	4.75814449	4.756824857	4.752646498	4.830773541	4.755901895	4.676228538	4.674375544	4.674819923	4.759103891			4.752127066	4.832073274	4.762438758	4.835046512	4.834374933	4.680784654	4.749471072	4.761659666	4.756261215	4.760185353	4.82869499	4.763814935
SLC4A1	4.755210397	4.754295638	4.751893173	4.833495658	4.756824857	4.752646498	4.755640931	4.755901895	4.676228538	4.758377372	4.758870438	4.759103891			4.752127066	4.832073274	4.762438758	4.759570873	4.758953191	5.973967849	4.824064554	4.837317508	4.831447986	4.760185353	4.82869499	4.679276406
CREG2	4.755210397	4.670696999	4.751893173	4.674165658	4.672976353	4.752646498	4.671909376	4.576346741	4.676228538	4.674375544	4.758870438	4.675030326			4.752127066	4.756836295	4.678036016	4.675451203	4.674894505	4.765488247	4.666349345	4.761659666	4.831447986	4.760185353	4.670186661	4.679276406
RXFP1	4.575802893	4.575083476	4.57319416	4.578110585	4.577072651	4.573786562	4.576141497	4.576346741	4.579910968	4.57829376	4.674819923	4.675030326			4.668742746	4.672986662	4.581488511	4.579232538	4.674894505	4.583887599	4.571289567	4.67733381	4.672468385	4.579715888	4.670186661	4.582571142
SPEF2	6.046939256	5.973948374	5.919160025	5.741494725	5.979555855	5.730415168	5.875697938	6.048511017	5.885918494	6.030854631	5.934350579	5.856378445			5.969136281	5.61463786	5.916413596	6.056843346	5.908911889	5.922969332	5.632675277	5.990260354	5.795323212	5.986998193	5.702804075	6.019281744
DTD1	5.076732377	5.075484552	5.016936974	5.025083574	5.131420513	5.125483784	5.179480794	5.022161454	4.968656783	5.081051734	5.184239499	5.02633355			5.221512266	5.078950039	5.139393123	5.135320824	5.231913008	5.090745993	5.068901814	4.97017379	5.130619815	5.233789464	5.074712018	5.088465276
GOLM2	6.198840724	6.196656428	6.084509773	6.285539024	6.027356679	6.31008772	6.093164936	6.240873023	6.21129524	6.226777044	6.122713313	6.268385866			6.039925675	6.202720906	6.236509738	6.345869864	6.248238598	6.501870423	6.100852647	6.332333192	6.52732734	6.50488992	6.174673647	6.299360124
FGF1	4.575802893	4.670696999	4.751893173	4.674165658	4.672976353	4.669210836	4.671909376	4.67214456	4.676228538	4.674375544	4.674819923	4.675030326			4.668742746	4.672986662	4.678036016	4.675451203	4.674894505	4.583887599	4.749471072	4.580875628	4.756261215	4.676005019	4.670186661	4.679276406
ARPP21	4.575802893	4.670696999	4.57319416	4.578110585	4.577072651	4.573786562	4.576141497	4.67214456	4.579910968	4.57829376	4.578681588	4.578865217			4.573378088	4.672986662	4.581488511	4.579232538	4.578746679	4.583887599	4.749471072	4.580875628	4.672468385	4.579715888	4.670186661	4.679276406
RHOXF1	4.962194691	5.224817412	5.351075678	5.133294986	5.228671091	5.073234723	5.272159431	5.357721561	5.234167106	5.402105126	5.362640132	5.232142525			5.072526028	5.317503549	5.282831612	5.321918649	5.479550448	5.034649503	5.013779632	5.236034308	5.227812396	5.186176547	5.127022547	5.191521938
ADAMTS17	4.962194691	4.961062731	4.958089577	4.902274621	4.832060837	4.895864666	4.899355941	4.831057292	4.835984234	4.833748865	4.834284959	4.834538784			4.826952719	4.832073274	4.838164539	4.835046512	4.903217362	4.841479839	4.824064554	4.837317508	4.900079099	4.8357146	4.82869499	4.839660693
DHH	4.755210397	4.754295638	4.826698385	4.75814449	4.756824857	4.752646498	4.671909376	4.831057292	4.835984234	4.833748865	4.758870438	4.759103891			4.826952719	4.900749543	4.762438758	4.835046512	4.834374933	4.841479839	4.824064554	4.837317508	4.96349495	4.760185353	4.75372934	4.763814935
ABRA	4.671521376	4.670696999	4.668531973	4.674165658	4.672976353	4.752646498	4.671909376	4.755901895	4.676228538	4.674375544	4.674819923	4.675030326			4.668742746	4.672986662	4.762438758	4.759570873	4.674894505	4.680784654	4.666349345	4.67733381	4.672468385	4.676005019	4.75372934	4.679276406
KLHDC1	6.690958893	6.112084148	6.170313134	6.226218423	6.411171091	6.382971092	6.25997806	6.373285337	6.690707552	6.121568693	6.22795958	6.363133837			5.919669855	5.979581203	6.152781067	6.102226549	5.959642808	6.046849157	5.752982825	5.888531134	5.707839955	5.774851309	5.702804075	6.04308934
RICTOR	5.396730309	5.395177263	5.391097239	5.319615918	5.274018851	5.267455142	5.315573	5.357721561	5.365228746	5.231035996	5.362640132	5.321164816			5.266638909	5.359270028	5.65773698	5.552325511	5.743122928	5.869833136	5.425505584	5.914737605	5.546237355	5.518153022	5.176663242	5.627904316
NETO1	4.671521376	4.829310755	4.668531973	4.75814449	4.756824857	4.827517541	4.830773541	4.67214456	4.760433352	4.758377372	4.758870438	4.759103891			4.668742746	4.832073274	4.762438758	4.759570873	4.834374933	4.680784654	4.892161979	4.906372237	4.96349495	4.968349985	5.223954398	4.763814935
WWP2	5.021260339	4.961062731	5.016936974	5.08073415	4.96419236	4.895864666	5.021821388	4.963050343	4.968656783	5.081051734	5.081724113	5.082042457			5.124745594	5.078950039	5.086589317	5.026941938	5.36277721	5.331466187	5.013779632	4.97017379	4.900079099	5.233789464	5.127022547	5.239315252
ST7L	4.755210397	4.670696999	4.751893173	4.674165658	4.756824857	4.669210836	4.671909376	4.67214456	4.676228538	4.758377372	4.758870438	4.675030326			4.826952719	4.756836295	4.762438758	4.675451203	4.834374933	4.765488247	4.666349345	4.761659666	4.756261215	4.760185353	4.82869499	4.763814935
C2orf15	4.671521376	4.575083476	4.668531973	4.578110585	4.577072651	4.573786562	4.671909376	4.576346741	4.676228538	4.674375544	4.578681588	4.675030326			4.668742746	4.672986662	4.678036016	4.759570873	4.578746679	4.680784654	4.666349345	4.580875628	4.576629343	4.579715888	4.670186661	4.679276406
KCNH8	5.271483177	4.961062731	4.894986292	5.133294986	5.023364134	4.959021888	5.226867339	5.022161454	4.968656783	4.966113228	4.834284959	4.967012072			5.01724184	4.964206513	5.448012409	5.026941938	4.903217362	4.910834624	4.824064554	4.837317508	4.900079099	4.9046537	5.019330183	4.97283973
MCF2L	4.898853994	4.897787478	4.894986292	4.902274621	4.96419236	4.959021888	4.962727433	4.963050343	4.835984234	4.966113228	4.903120894	4.967012072			5.072526028	5.023379039	4.907280352	4.903937406	5.081836958	5.034649503	4.95509176	5.029663003	5.02262968	5.027742458	4.897127216	5.03247027
SLCO6A1	4.671521376	4.670696999	4.751893173	4.674165658	4.672976353	4.669210836	4.671909376	4.67214456	4.676228538	4.674375544	4.674819923	4.675030326			4.668742746	4.672986662	4.762438758	4.675451203	4.674894505	4.680784654	4.666349345	4.67733381	4.756261215	4.579715888	4.670186661	4.679276406
PP2D1	4.575802893	4.575083476	4.668531973	4.578110585	4.577072651	4.573786562	4.671909376	4.67214456	4.676228538	4.57829376	4.578681588	4.675030326			4.668742746	4.577081647	4.581488511	4.579232538	4.578746679	4.680784654	4.571289567	4.580875628	4.576629343	4.760185353	4.670186661	4.679276406
KLC3	5.900846478	5.872825925	5.893689395	5.799210667	5.929900938	5.945786036	5.927324133	5.707125488	5.685400618	5.771166046	5.800708563	5.772647173			6.128662562	6.003704005	5.689327521	5.773599022	5.85606051	5.695294815	6.18512141	5.914737605	6.221698798	5.715637972	5.79009334	5.752903276
CIB3	4.671521376	4.670696999	4.57319416	4.578110585	4.672976353	4.752646498	4.671909376	4.576346741	4.676228538	4.674375544	4.674819923	4.578865217			4.668742746	4.756836295	4.678036016	4.675451203	4.674894505	4.680784654	4.666349345	4.67733381	4.672468385	4.676005019	4.574638121	4.582571142
CADM2	4.671521376	4.670696999	4.668531973	4.674165658	4.672976353	4.752646498	4.671909376	4.755901895	4.676228538	4.674375544	4.758870438	4.675030326			4.668742746	4.672986662	4.678036016	4.759570873	4.834374933	4.765488247	4.749471072	4.67733381	4.756261215	4.760185353	4.75372934	4.679276406
DOCK8-AS1	5.314877587	5.313399888	5.391097239	5.276091045	5.581428876	5.22230402	5.357289055	5.272569315	5.365228746	5.550130578	5.362640132	5.516200433			5.467453006	5.51210479	5.408993433	5.27833044	5.772339972	5.45329702	5.262464373	5.407672444	5.398514037	5.774851309	5.354120326	5.722843002
HDAC9	4.755210397	4.829310755	4.751893173	4.833495658	4.832060837	4.895864666	4.755640931	4.755901895	4.760433352	4.833748865	4.834284959	4.675030326			4.826952719	4.900749543	4.838164539	4.759570873	4.674894505	4.841479839	4.824064554	4.761659666	4.831447986	4.9046537	4.897127216	4.763814935
SLC16A11	5.226211339	5.471298024	5.503169792	5.361437534	5.475780357	5.392376773	5.436220996	5.510416531	5.588180918	5.319991913	5.479403892	5.403337706			5.467453006	5.51210479	5.448012409	5.363800328	5.68250086	5.373596428	5.600611481	5.367259387	5.398514037	5.553455349	5.432902416	5.328767218
TMEM67	4.575802893	4.575083476	4.57319416	4.674165658	4.577072651	4.669210836	4.576141497	4.576346741	4.579910968	4.57829376	4.578681588	4.578865217			4.573378088	4.672986662	4.581488511	4.579232538	4.578746679	4.583887599	4.571289567	4.67733381	4.576629343	4.579715888	4.574638121	4.582571142
HS6ST2	4.575802893	4.575083476	4.57319416	4.578110585	4.577072651	4.573786562	4.576141497	4.576346741	4.579910968	4.57829376	4.578681588	4.578865217			4.573378088	4.672986662	4.678036016	4.675451203	4.578746679	4.583887599	4.571289567	4.580875628	4.576629343	4.676005019	4.670186661	4.582571142
CAMKK1	5.435473681	5.313399888	5.467038197	5.440565417	5.399470662	5.504532086	5.397461167	5.436673943	5.323310776	5.51488844	5.479403892	5.442229714			5.538626124	5.359270028	5.408993433	5.480644295	5.618664536	5.414162219	5.663897072	5.656233669	5.546237355	5.444105384	5.470294105	5.488156325
ZNF625	4.755210397	4.829310755	4.751893173	4.75814449	4.756824857	4.752646498	4.755640931	4.831057292	4.760433352	4.758377372	4.834284959	4.675030326			4.826952719	4.832073274	4.838164539	4.759570873	4.834374933	4.841479839	4.824064554	4.761659666	4.831447986	4.8357146	4.670186661	4.908884374
ZNF563	4.898853994	4.897787478	5.016936974	4.965825102	4.900736207	4.959021888	5.021821388	5.022161454	5.083855234	4.902546106	4.903120894	5.02633355			4.826952719	4.832073274	4.907280352	4.903937406	4.903217362	4.841479839	4.824064554	4.906372237	4.900079099	4.9046537	4.82869499	4.97283973
LIN9	4.671521376	4.670696999	4.57319416	4.578110585	4.672976353	4.573786562	4.671909376	4.576346741	4.579910968	4.674375544	4.674819923	4.675030326			4.668742746	4.577081647	4.678036016	4.579232538	4.674894505	4.583887599	4.571289567	4.580875628	4.576629343	4.579715888	4.574638121	4.582571142
CLEC4D	6.602719743	6.387130206	6.952384726	7.477365262	6.576254086	6.533863031	6.633916377	6.734934348	7.078692348	7.08362556	7.085054226	6.784595881			6.624519576	7.414815513	7.1796466	6.812517338	7.106804103	7.060014464	6.632134434	6.968383225	6.707982263	7.441989405	7.233287593	7.347697983
SLC25A27	4.671521376	4.670696999	4.751893173	4.75814449	4.672976353	4.752646498	4.671909376	4.755901895	4.676228538	4.674375544	4.758870438	4.759103891			4.826952719	4.672986662	4.762438758	4.675451203	4.758953191	4.583887599	4.824064554	4.761659666	4.831447986	4.760185353	4.897127216	4.679276406
GPRC6A	5.076732377	5.224817412	5.173956297	5.133294986	5.228671091	5.310735353	5.226867339	5.22726495	5.279684298	5.133625759	5.081724113	5.232142525			5.124745594	5.317503549	5.326546993	5.185271371	5.320921533	5.143722048	5.462741452	5.13828695	5.273133659	5.233789464	5.127022547	5.141346844
RAET1E	4.830305409	4.961062731	4.826698385	4.833495658	4.832060837	4.959021888	4.830773541	4.755901895	4.760433352	4.833748865	4.903120894	4.759103891			4.826952719	4.900749543	4.838164539	4.903937406	4.834374933	4.841479839	5.170384704	4.97017379	4.900079099	4.8357146	4.82869499	4.763814935
SLC44A5	4.575802893	4.575083476	4.57319416	4.578110585	4.577072651	4.669210836	4.671909376	4.576346741	4.579910968	4.57829376	4.578681588	4.578865217			4.668742746	4.672986662	4.581488511	4.579232538	4.674894505	4.583887599	4.571289567	4.580875628	4.576629343	4.579715888	4.574638121	4.582571142
ZNF417	4.575802893	4.575083476	4.57319416	4.578110585	4.577072651	4.573786562	4.576141497	4.576346741	4.579910968	4.57829376	4.578681588	4.578865217			4.573378088	4.577081647	4.581488511	4.579232538	4.578746679	4.583887599	4.571289567	4.580875628	4.576629343	4.579715888	4.574638121	4.582571142
ZNF781	4.755210397	4.754295638	4.751893173	4.75814449	4.672976353	4.752646498	4.755640931	4.755901895	4.676228538	4.674375544	4.674819923	4.759103891			4.668742746	4.756836295	4.678036016	4.675451203	4.758953191	4.765488247	4.666349345	4.67733381	4.756261215	4.676005019	4.670186661	4.679276406
HELB	5.021260339	4.897787478	4.958089577	5.276091045	5.078934438	5.073234723	4.899355941	4.899660188	4.904942788	4.833748865	5.026029397	5.082042457			5.072526028	4.832073274	5.368549262	5.08267923	5.026137212	4.974909316	5.120970451	4.97017379	4.900079099	4.968349985	5.127022547	5.03247027
SEC62	5.611543697	5.224817412	5.351075678	5.276091045	5.228671091	5.22230402	5.397461167	5.436673943	5.444535456	5.36182334	5.479403892	5.403337706			5.124745594	5.181242373	5.237220415	5.08267923	5.134443588	5.331466187	5.262464373	5.325289854	5.078165685	5.136193459	5.223954398	5.370827271
TRDN	4.575802893	4.670696999	4.57319416	4.578110585	4.577072651	4.669210836	4.576141497	4.576346741	4.579910968	4.57829376	4.578681588	4.675030326			4.573378088	4.577081647	4.581488511	4.579232538	4.578746679	4.583887599	4.666349345	4.67733381	4.576629343	4.676005019	4.670186661	4.582571142
SOCS4	4.671521376	4.670696999	4.668531973	4.674165658	4.672976353	4.669210836	4.671909376	4.67214456	4.676228538	4.674375544	4.674819923	4.675030326			4.752127066	4.672986662	4.678036016	4.675451203	4.674894505	4.583887599	4.666349345	4.580875628	4.672468385	4.760185353	4.75372934	4.679276406
C8orf31	4.898853994	4.897787478	4.958089577	4.965825102	4.900736207	4.959021888	4.899355941	4.899660188	4.904942788	5.025386996	4.903120894	4.967012072			4.826952719	4.964206513	4.907280352	5.026941938	5.026137212	4.841479839	4.824064554	4.906372237	5.130619815	4.8357146	4.82869499	4.763814935
ZNF547	4.671521376	4.670696999	4.668531973	4.674165658	4.672976353	4.669210836	4.755640931	4.67214456	4.835984234	4.674375544	4.758870438	4.675030326			4.573378088	4.672986662	4.581488511	4.579232538	4.674894505	4.583887599	4.666349345	4.67733381	4.672468385	4.676005019	4.670186661	4.763814935
SIM1	4.755210397	4.670696999	4.751893173	4.833495658	4.756824857	4.752646498	4.755640931	4.755901895	4.676228538	4.758377372	4.758870438	4.759103891			4.826952719	4.756836295	4.678036016	4.759570873	4.758953191	4.680784654	4.824064554	4.837317508	4.756261215	4.760185353	4.75372934	4.679276406
PROM2	4.671521376	4.670696999	4.668531973	4.674165658	4.672976353	4.573786562	4.671909376	4.67214456	4.676228538	4.674375544	4.674819923	4.675030326			4.668742746	4.672986662	4.581488511	4.759570873	4.674894505	4.680784654	4.749471072	4.67733381	4.672468385	4.676005019	4.670186661	4.582571142
TLR4	5.793153127	5.762838754	5.992644947	6.006627306	5.979555855	5.638819991	5.736451746	5.545576107	5.885918494	6.121568693	6.36255231	6.144992553			6.231746613	6.445860183	6.276469871	5.960998245	6.398857732	6.704281409	6.392535727	6.387699054	6.337662279	6.800952269	6.715126524	7.00965548
TSNARE1	4.755210397	4.670696999	4.751893173	4.75814449	4.672976353	4.752646498	4.755640931	4.67214456	4.676228538	4.674375544	4.674819923	4.675030326			4.752127066	4.756836295	4.678036016	4.759570873	4.674894505	4.680784654	4.749471072	4.761659666	4.672468385	4.760185353	4.670186661	4.582571142
CAPN13	4.575802893	4.670696999	4.57319416	4.578110585	4.672976353	4.669210836	4.576141497	4.67214456	4.579910968	4.674375544	4.674819923	4.578865217			4.668742746	4.672986662	4.581488511	4.675451203	4.674894505	4.680784654	4.571289567	4.67733381	4.756261215	4.676005019	4.670186661	4.582571142
STMN1	4.755210397	4.754295638	4.668531973	4.674165658	4.756824857	4.752646498	4.671909376	4.576346741	4.676228538	4.674375544	4.674819923	4.675030326			4.573378088	4.672986662	4.678036016	4.675451203	4.674894505	4.680784654	4.749471072	4.761659666	4.672468385	4.676005019	4.75372934	4.582571142
SIGLEC10	6.458694646	6.506036243	7.399743565	6.98189685	6.651872466	6.698167463	6.390520446	6.879220809	6.814896442	6.822345223	6.517906074	7.052832995			7.339510308	7.794710212	7.040027578	6.974261247	7.258445238	7.27782667	6.22531573	7.332111142	7.088271107	7.458783991	7.174295499	7.770168246
RFX4	4.671521376	4.754295638	4.751893173	4.674165658	4.672976353	4.669210836	4.671909376	4.67214456	4.676228538	4.674375544	4.674819923	4.675030326			4.668742746	4.672986662	4.678036016	4.759570873	4.758953191	4.680784654	4.666349345	4.67733381	4.672468385	4.676005019	4.670186661	4.679276406
WFIKKN1	5.578406099	5.64200922	5.668653729	5.617126507	5.678329243	5.787855355	5.794042325	5.676519456	5.518600723	5.68137247	5.742956335	5.618951112			5.758410422	5.738860055	5.720112039	5.830064383	5.800879291	5.695294815	5.694326353	5.777854965	5.928674311	5.715637972	5.541576858	5.660391662
SENP1	5.226211339	5.177497987	5.072206902	5.133294986	5.274018851	5.267455142	4.899355941	5.272569315	4.968656783	5.025386996	5.081724113	5.232142525			5.072526028	5.228688517	5.139393123	5.08267923	5.277360745	5.034649503	5.170384704	5.281608998	5.078165685	5.027742458	5.176663242	5.141346844
KLF14	4.755210397	4.754295638	4.826698385	4.75814449	4.832060837	4.827517541	4.830773541	4.831057292	4.835984234	4.758377372	4.834284959	4.903393038			4.752127066	5.023379039	4.838164539	4.903937406	4.966825629	4.910834624	4.95509176	4.837317508	4.900079099	4.968349985	4.82869499	4.839660693
NXNL2	4.755210397	4.670696999	4.751893173	4.75814449	4.756824857	4.752646498	4.755640931	4.831057292	4.676228538	4.758377372	4.758870438	4.759103891			4.752127066	4.756836295	4.678036016	4.759570873	4.758953191	4.680784654	4.749471072	4.761659666	4.756261215	4.760185353	4.670186661	4.763814935
BRS3	4.671521376	4.575083476	4.57319416	4.674165658	4.577072651	4.573786562	4.576141497	4.67214456	4.579910968	4.57829376	4.674819923	4.578865217			4.668742746	4.672986662	4.581488511	4.579232538	4.674894505	4.583887599	4.666349345	4.580875628	4.672468385	4.676005019	4.574638121	4.679276406
TMX3	4.898853994	4.829310755	4.826698385	4.833495658	4.96419236	4.959021888	4.962727433	4.831057292	4.904942788	5.025386996	4.966723249	4.759103891			4.826952719	4.900749543	4.907280352	4.903937406	4.903217362	4.841479839	4.824064554	4.906372237	4.831447986	4.8357146	4.960361946	4.908884374
ZNF396	4.575802893	4.575083476	4.57319416	4.578110585	4.577072651	4.669210836	4.576141497	4.576346741	4.579910968	4.57829376	4.578681588	4.675030326			4.573378088	4.577081647	4.678036016	4.579232538	4.578746679	4.680784654	4.666349345	4.67733381	4.672468385	4.676005019	4.670186661	4.679276406
SLC26A7	4.575802893	4.575083476	4.57319416	4.578110585	4.577072651	4.573786562	4.576141497	4.576346741	4.579910968	4.57829376	4.578681588	4.578865217			4.573378088	4.577081647	4.581488511	4.579232538	4.578746679	4.583887599	4.571289567	4.580875628	4.576629343	4.579715888	4.574638121	4.582571142
SNX18	5.643777661	5.313399888	5.351075678	5.361437534	5.317485076	5.352324918	5.226867339	5.22726495	5.444535456	5.276456696	5.402941657	5.363026837			5.35146356	5.274036814	5.326546993	5.232853712	5.515928306	5.287615833	5.217463012	5.446661785	5.474781659	5.621007329	5.176663242	5.838913175
FBXO39	4.755210397	4.754295638	4.826698385	4.833495658	4.832060837	4.827517541	4.830773541	4.755901895	4.760433352	4.833748865	4.758870438	4.759103891			4.752127066	4.832073274	4.762438758	4.835046512	4.758953191	4.765488247	4.749471072	4.761659666	4.831447986	4.8357146	4.75372934	4.763814935
B3GNT6	5.076732377	5.127827214	5.124413185	5.025083574	5.078934438	5.017918872	5.021821388	5.17986539	5.186541852	5.081051734	5.134326058	5.082042457			5.174301141	5.181242373	5.189495458	5.08267923	5.184361414	4.974909316	4.95509176	5.029663003	5.227812396	5.136193459	5.074712018	5.088465276
DENND1B	5.021260339	4.961062731	4.958089577	4.965825102	5.023364134	5.017918872	4.962727433	5.07767559	4.968656783	4.833748865	4.966723249	4.903393038			4.958379046	5.023379039	5.030677827	5.026941938	4.966825629	4.974909316	4.95509176	5.029663003	5.078165685	5.027742458	5.176663242	4.908884374
ZNF619	5.509166926	5.433885652	5.429713635	5.478118123	5.359251073	5.539582822	5.545095828	5.357721561	5.444535456	5.440969431	5.441824765	5.479817335			5.637815193	5.475800624	5.522220105	5.443039689	5.651008972	5.527720859	5.663897072	5.556165515	5.978306672	5.481732331	5.702804075	5.594503102
CILK1	4.575802893	4.670696999	4.57319416	4.674165658	4.577072651	4.573786562	4.576141497	4.576346741	4.579910968	4.57829376	4.578681588	4.578865217			4.573378088	4.577081647	4.581488511	4.579232538	4.674894505	4.583887599	4.571289567	4.67733381	4.576629343	4.676005019	4.574638121	4.679276406
FAM71D	4.575802893	4.575083476	4.668531973	4.674165658	4.672976353	4.669210836	4.671909376	4.67214456	4.676228538	4.57829376	4.674819923	4.578865217			4.668742746	4.672986662	4.581488511	4.759570873	4.674894505	4.680784654	4.749471072	4.67733381	4.756261215	4.676005019	4.670186661	4.582571142
BCL2L14	4.575802893	4.670696999	4.57319416	4.674165658	4.672976353	4.573786562	4.576141497	4.67214456	4.676228538	4.57829376	4.578681588	4.675030326			4.668742746	4.672986662	4.678036016	4.675451203	4.674894505	4.680784654	4.571289567	4.67733381	4.672468385	4.760185353	4.670186661	4.679276406
HS6ST3	4.755210397	4.754295638	4.751893173	4.833495658	4.832060837	4.827517541	4.755640931	4.831057292	4.760433352	4.833748865	4.834284959	4.675030326			4.826952719	4.900749543	4.762438758	4.903937406	4.834374933	4.680784654	4.824064554	4.837317508	4.756261215	4.8357146	4.82869499	4.763814935
SLC26A1	4.671521376	4.670696999	4.668531973	4.674165658	4.672976353	4.752646498	4.671909376	4.755901895	4.676228538	4.57829376	4.758870438	4.675030326			4.668742746	4.672986662	4.678036016	4.759570873	4.674894505	4.583887599	4.666349345	4.580875628	4.672468385	4.676005019	4.670186661	4.763814935
CLDN15	6.297534729	6.021653618	6.039393295	6.121027989	6.117963088	6.31008772	6.220209352	6.200491318	6.081704959	6.305311315	6.186863999	6.326035119			6.149935245	6.07347579	6.016213107	6.124338924	6.228158023	6.138053314	6.056588734	6.193466193	6.201348807	5.986998193	5.996755356	6.111996043
RAB42	5.356575472	5.576692866	5.503169792	5.478118123	5.438275719	5.431022032	5.579212308	5.357721561	5.518600723	5.319991913	5.551037433	5.58569397			5.538626124	5.475800624	5.48572119	5.404129882	5.585412013	5.563199189	5.425505584	5.556165515	5.580373693	5.553455349	5.269156525	5.239315252
PTCHD1	4.671521376	4.754295638	4.751893173	4.75814449	4.672976353	4.669210836	4.755640931	4.755901895	4.579910968	4.758377372	4.674819923	4.675030326			4.752127066	4.672986662	4.762438758	4.759570873	4.758953191	4.680784654	4.749471072	4.761659666	4.831447986	4.676005019	4.670186661	4.679276406
M1AP	4.575802893	4.670696999	4.57319416	4.578110585	4.577072651	4.573786562	4.576141497	4.576346741	4.579910968	4.57829376	4.674819923	4.578865217			4.573378088	4.672986662	4.581488511	4.579232538	4.674894505	4.583887599	4.571289567	4.580875628	4.576629343	4.579715888	4.574638121	4.582571142
ZSCAN4	4.671521376	4.575083476	4.668531973	4.674165658	4.672976353	4.669210836	4.576141497	4.67214456	4.676228538	4.674375544	4.578681588	4.675030326			4.668742746	4.577081647	4.678036016	4.675451203	4.674894505	4.680784654	4.749471072	4.67733381	4.672468385	4.8357146	4.670186661	4.679276406
VWA5B1	4.755210397	4.829310755	4.826698385	4.75814449	4.756824857	4.827517541	4.755640931	4.755901895	4.835984234	4.758377372	4.834284959	4.834538784			4.895259013	4.832073274	4.838164539	4.903937406	4.834374933	4.841479839	4.749471072	4.837317508	4.831447986	4.760185353	4.82869499	4.763814935
LINC00311	4.671521376	4.575083476	4.668531973	4.674165658	4.756824857	4.669210836	4.671909376	4.576346741	4.676228538	4.674375544	4.674819923	4.675030326			4.573378088	4.577081647	4.678036016	4.675451203	4.578746679	4.765488247	4.666349345	4.67733381	4.672468385	4.676005019	4.574638121	4.582571142
HTR6	4.755210397	4.754295638	4.751893173	4.833495658	4.756824857	4.827517541	4.755640931	4.831057292	4.676228538	4.758377372	4.758870438	4.759103891			4.752127066	4.672986662	4.762438758	4.759570873	4.674894505	4.765488247	4.749471072	4.761659666	4.756261215	4.676005019	4.75372934	4.763814935
MAGEB6	4.575802893	4.575083476	4.57319416	4.578110585	4.577072651	4.573786562	4.576141497	4.576346741	4.579910968	4.57829376	4.578681588	4.578865217			4.573378088	4.577081647	4.581488511	4.579232538	4.578746679	4.583887599	4.457664748	4.580875628	4.576629343	4.579715888	4.574638121	4.582571142
RUSC1-AS1	5.611543697	5.50751358	5.538195299	5.741494725	5.64689776	5.787855355	5.545095828	5.707125488	5.859182544	5.799691225	5.800708563	5.883084877			5.467453006	5.547295551	5.625290019	5.652201697	5.651008972	5.756266266	5.533732514	5.623809594	5.437297567	5.653388047	5.575632073	5.838913175
CACNG6	6.297534729	6.387130206	6.608981812	6.466214763	6.528795482	6.669717559	6.775077469	6.460468016	6.251807871	6.611118237	6.550143369	6.485488146			6.724622549	6.637108646	6.460136007	6.614279328	6.612643612	6.66014795	6.810557786	6.604474212	7.022296959	6.690040551	6.658184966	6.299360124
LMNTD1	4.830305409	4.897787478	4.958089577	4.833495658	4.832060837	5.017918872	4.962727433	4.899660188	4.904942788	5.025386996	5.026029397	4.967012072			5.01724184	4.964206513	4.907280352	4.903937406	5.081836958	4.974909316	5.013779632	5.029663003	5.078165685	4.8357146	4.82869499	4.839660693
CIRBP-AS1	5.396730309	5.395177263	5.538195299	5.440565417	5.547274504	5.468374146	5.579212308	5.474144933	5.444535456	5.402105126	5.441824765	5.479817335			5.503592782	5.581450289	5.326546993	5.552325511	5.403082047	5.193985542	5.694326353	5.520814175	5.677224081	5.481732331	5.354120326	5.370827271
AXDND1	4.575802893	4.575083476	4.668531973	4.578110585	4.577072651	4.573786562	4.576141497	4.576346741	4.579910968	4.57829376	4.578681588	4.578865217			4.573378088	4.577081647	4.581488511	4.579232538	4.578746679	4.583887599	4.571289567	4.580875628	4.576629343	4.579715888	4.574638121	4.679276406
ASMTL-AS1	4.962194691	4.897787478	4.958089577	4.902274621	5.078934438	5.073234723	4.899355941	5.022161454	5.234167106	4.966113228	5.026029397	4.834538784			5.01724184	5.131436762	5.086589317	5.026941938	4.966825629	5.034649503	4.892161979	4.97017379	4.96349495	4.968349985	4.960361946	4.908884374
CD200R1	5.129126928	5.02006822	5.016936974	5.025083574	5.078934438	5.125483784	5.129738602	5.07767559	5.323310776	4.966113228	5.184239499	5.02633355			4.958379046	4.964206513	5.030677827	4.9675898	4.903217362	5.143722048	5.013779632	5.13828695	5.18039492	4.968349985	5.074712018	4.97283973
LINC00334	4.671521376	4.754295638	4.57319416	4.674165658	4.672976353	4.669210836	4.671909376	4.67214456	4.676228538	4.674375544	4.674819923	4.675030326			4.826952719	4.756836295	4.838164539	4.675451203	4.758953191	4.680784654	4.824064554	4.761659666	4.831447986	4.760185353	4.82869499	4.679276406
ATOH7	4.575802893	4.575083476	4.57319416	4.578110585	4.577072651	4.669210836	4.576141497	4.576346741	4.579910968	4.57829376	4.578681588	4.578865217			4.573378088	4.577081647	4.581488511	4.579232538	4.578746679	4.583887599	4.571289567	4.580875628	4.576629343	4.579715888	4.574638121	4.582571142
SEC16B	4.575802893	4.575083476	4.57319416	4.578110585	4.577072651	4.573786562	4.671909376	4.576346741	4.579910968	4.674375544	4.674819923	4.578865217			4.668742746	4.577081647	4.678036016	4.675451203	4.578746679	4.680784654	4.571289567	4.67733381	4.576629343	4.579715888	4.574638121	4.582571142
AMER1	4.898853994	4.897787478	4.894986292	4.902274621	4.96419236	5.017918872	4.755640931	4.899660188	4.835984234	4.966113228	4.966723249	4.903393038			4.958379046	5.023379039	4.762438758	4.835046512	4.903217362	4.910834624	4.892161979	4.906372237	4.900079099	4.9046537	4.960361946	4.97283973
NKX6-3	4.962194691	5.075484552	4.958089577	4.902274621	4.96419236	4.959021888	5.179480794	4.899660188	4.904942788	4.966113228	5.081724113	4.967012072			5.072526028	5.078950039	5.030677827	4.9675898	5.231913008	5.143722048	4.95509176	5.029663003	5.02262968	5.083517091	4.897127216	4.97283973
TBATA	4.830305409	4.829310755	4.894986292	4.75814449	4.832060837	4.827517541	4.830773541	4.755901895	4.676228538	4.833748865	4.834284959	4.834538784			4.826952719	4.832073274	4.838164539	4.759570873	4.834374933	4.910834624	5.013779632	4.837317508	4.831447986	4.760185353	4.75372934	4.763814935
EXOC3L2	5.578406099	5.898873658	5.786297964	5.770691209	5.738837013	5.869303464	5.821859812	5.707125488	5.588180918	5.771166046	5.882587162	5.772647173			5.969136281	6.050634208	5.779441691	5.857363544	5.85606051	5.948723805	5.862515434	5.484342289	6.09459615	5.858659557	5.761682624	5.692021059
CABP4	4.962194691	5.075484552	5.072206902	4.965825102	5.023364134	4.895864666	5.077319638	5.022161454	5.083855234	4.966113228	5.026029397	5.082042457			5.124745594	5.023379039	5.030677827	5.135320824	5.026137212	4.974909316	5.013779632	4.906372237	5.130619815	4.8357146	5.019330183	4.97283973
TNFRSF13C	5.951423145	5.924394797	5.992644947	5.881039214	5.824332587	6.01793201	5.976931653	5.927892212	5.746102027	5.82757379	5.855885919	5.772647173			5.944643349	6.095922739	5.890190414	5.802153498	5.85606051	5.922969332	6.100852647	5.914737605	6.241740928	5.803420853	5.702804075	5.722843002
CAMK2N2	5.271483177	5.395177263	5.309517974	5.276091045	5.359251073	5.310735353	5.357289055	5.272569315	5.279684298	5.319991913	5.277230825	5.277597336			5.391494528	5.399490075	5.326546993	5.443039689	5.320921533	5.414162219	5.305602893	5.325289854	5.546237355	5.279295022	5.176663242	5.191521938
ANKRD30BP2	4.671521376	4.670696999	4.57319416	4.578110585	4.672976353	4.669210836	4.671909376	4.67214456	4.579910968	4.57829376	4.578681588	4.759103891			4.668742746	4.756836295	4.678036016	4.675451203	4.674894505	4.680784654	4.666349345	4.67733381	4.672468385	4.676005019	4.670186661	4.679276406
KCNG3	4.575802893	4.575083476	4.57319416	4.578110585	4.672976353	4.573786562	4.671909376	4.576346741	4.579910968	4.674375544	4.578681588	4.675030326			4.573378088	4.577081647	4.678036016	4.675451203	4.578746679	4.583887599	4.666349345	4.761659666	4.576629343	4.579715888	4.75372934	4.582571142
LINC01312	4.575802893	4.575083476	4.57319416	4.674165658	4.672976353	4.573786562	4.671909376	4.576346741	4.579910968	4.674375544	4.674819923	4.578865217			4.573378088	4.577081647	4.581488511	4.579232538	4.578746679	4.680784654	4.571289567	4.580875628	4.576629343	4.579715888	4.574638121	4.582571142
FOXP2	4.755210397	4.670696999	4.668531973	4.75814449	4.672976353	4.827517541	4.755640931	4.755901895	4.676228538	4.674375544	4.758870438	4.834538784			4.895259013	4.756836295	4.762438758	4.759570873	4.674894505	4.841479839	4.749471072	4.761659666	4.756261215	4.8357146	4.897127216	4.679276406
B4GALNT2	4.755210397	4.829310755	4.826698385	4.75814449	4.756824857	4.895864666	4.830773541	4.67214456	4.676228538	4.758377372	4.758870438	4.834538784			4.826952719	4.832073274	4.762438758	4.835046512	4.834374933	4.841479839	4.749471072	4.837317508	4.831447986	4.760185353	4.82869499	4.763814935
FMR1NB	4.575802893	4.575083476	4.57319416	4.578110585	4.577072651	4.573786562	4.576141497	4.576346741	4.579910968	4.57829376	4.578681588	4.578865217			4.668742746	4.577081647	4.581488511	4.579232538	4.578746679	4.583887599	4.571289567	4.580875628	4.672468385	4.579715888	4.574638121	4.679276406
GCSAML	4.755210397	4.754295638	4.751893173	4.75814449	4.756824857	4.827517541	4.671909376	4.67214456	4.760433352	4.758377372	4.758870438	4.759103891			4.752127066	4.756836295	4.762438758	4.759570873	4.758953191	4.910834624	4.749471072	4.761659666	4.756261215	4.9046537	4.670186661	4.679276406
SIGLEC11	4.671521376	4.897787478	4.751893173	4.902274621	4.832060837	4.669210836	4.830773541	4.755901895	4.760433352	4.966113228	4.966723249	4.834538784			4.826952719	4.964206513	4.762438758	4.759570873	4.834374933	4.841479839	4.95509176	4.837317508	4.756261215	5.083517091	4.897127216	4.839660693
IL23R	4.755210397	4.670696999	4.668531973	4.674165658	4.672976353	4.827517541	4.576141497	4.831057292	4.676228538	4.674375544	4.674819923	4.675030326			4.573378088	4.672986662	4.762438758	4.675451203	4.674894505	4.765488247	4.666349345	4.580875628	4.672468385	4.676005019	4.75372934	4.679276406
MAGEB18	4.575802893	4.575083476	4.57319416	4.578110585	4.672976353	4.573786562	4.576141497	4.67214456	4.676228538	4.57829376	4.578681588	4.578865217			4.573378088	4.577081647	4.581488511	4.579232538	4.578746679	4.583887599	4.571289567	4.580875628	4.576629343	4.579715888	4.574638121	4.582571142
CD276	5.076732377	5.075484552	5.124413185	5.183169958	5.023364134	5.125483784	5.077319638	5.13010935	5.083855234	5.133625759	5.134326058	5.134657618			5.174301141	5.131436762	5.030677827	5.135320824	5.134443588	5.287615833	5.068901814	5.236034308	5.227812396	5.027742458	4.960361946	4.97283973
IFNL2	4.671521376	4.670696999	4.751893173	4.674165658	4.672976353	4.752646498	4.755640931	4.67214456	4.676228538	4.57829376	4.674819923	4.759103891			4.752127066	4.672986662	4.762438758	4.675451203	4.834374933	4.680784654	4.749471072	4.67733381	4.831447986	4.676005019	4.670186661	4.582571142
IFNL1	4.962194691	4.829310755	4.894986292	4.75814449	4.832060837	4.827517541	4.830773541	4.831057292	5.028065533	4.833748865	4.903120894	4.903393038			4.826952719	4.900749543	4.762438758	4.759570873	4.758953191	4.910834624	5.013779632	4.837317508	4.831447986	4.760185353	4.82869499	4.839660693
C4orf36	4.671521376	4.670696999	4.57319416	4.578110585	4.577072651	4.573786562	4.576141497	4.576346741	4.676228538	4.57829376	4.578681588	4.578865217			4.668742746	4.577081647	4.581488511	4.675451203	4.578746679	4.680784654	4.571289567	4.67733381	4.576629343	4.579715888	4.574638121	4.582571142
FIGNL1	5.544303408	5.355059147	4.826698385	5.230681282	5.078934438	5.352324918	5.226867339	5.315994494	5.323310776	5.081051734	5.081724113	5.134657618			5.266638909	5.078950039	5.030677827	5.232853712	5.081836958	4.841479839	5.217463012	5.029663003	5.078165685	5.322910499	5.354120326	5.03247027
RIMS1	4.671521376	4.754295638	4.668531973	4.674165658	4.672976353	4.669210836	4.671909376	4.67214456	4.676228538	4.674375544	4.674819923	4.675030326			4.668742746	4.672986662	4.678036016	4.675451203	4.674894505	4.680784654	4.749471072	4.67733381	4.672468385	4.676005019	4.574638121	4.679276406
PITPNM2	4.898853994	4.897787478	4.894986292	4.833495658	5.078934438	4.959021888	4.962727433	4.899660188	4.835984234	4.833748865	4.903120894	4.967012072			4.958379046	4.964206513	4.971137515	4.903937406	4.966825629	4.841479839	5.013779632	5.029663003	5.130619815	4.9046537	4.897127216	4.908884374
PCDH10	4.755210397	4.829310755	4.751893173	4.902274621	4.756824857	4.827517541	4.755640931	4.755901895	4.676228538	4.758377372	4.834284959	4.759103891			4.826952719	4.756836295	4.762438758	4.759570873	4.758953191	4.765488247	4.824064554	4.837317508	4.831447986	4.760185353	4.82869499	4.763814935
TAB3	4.830305409	4.670696999	4.751893173	4.75814449	4.756824857	4.827517541	4.671909376	4.755901895	4.676228538	4.833748865	4.758870438	4.759103891			4.752127066	4.756836295	4.838164539	4.759570873	4.758953191	4.680784654	4.749471072	4.761659666	4.672468385	4.8357146	4.670186661	4.763814935
GRK7	4.671521376	4.575083476	4.57319416	4.578110585	4.672976353	4.669210836	4.671909376	4.67214456	4.579910968	4.674375544	4.674819923	4.675030326			4.668742746	4.672986662	4.678036016	4.675451203	4.758953191	4.583887599	4.666349345	4.67733381	4.672468385	4.676005019	4.670186661	4.582571142
MMEL1	5.129126928	5.177497987	5.221155733	5.133294986	5.274018851	5.310735353	5.129738602	5.22726495	5.136545634	5.231035996	5.134326058	5.321164816			5.221512266	5.359270028	5.368549262	5.185271371	5.320921533	5.193985542	5.120970451	5.367259387	5.358317046	5.186176547	5.019330183	5.088465276
PDE8A	4.962194691	5.02006822	4.958089577	5.183169958	5.078934438	4.959021888	5.021821388	5.022161454	5.028065533	5.025386996	5.134326058	5.02633355			5.01724184	4.900749543	5.189495458	4.9675898	5.026137212	4.974909316	4.892161979	4.906372237	4.900079099	4.9046537	4.960361946	5.088465276
NLRP6	4.755210397	4.754295638	4.751893173	4.833495658	4.832060837	4.752646498	4.671909376	4.755901895	4.760433352	4.833748865	4.834284959	4.759103891			4.958379046	4.832073274	4.838164539	4.759570873	4.834374933	4.910834624	4.824064554	4.837317508	4.831447986	4.9046537	4.75372934	4.839660693
AKNAD1	4.575802893	4.754295638	4.668531973	4.674165658	4.672976353	4.669210836	4.671909376	4.576346741	4.579910968	4.674375544	4.674819923	4.578865217			4.668742746	4.672986662	4.678036016	4.675451203	4.674894505	4.680784654	4.666349345	4.761659666	4.672468385	4.676005019	4.670186661	4.679276406
RTL3	5.021260339	5.02006822	5.124413185	5.133294986	5.181225517	5.073234723	5.021821388	5.07767559	5.028065533	5.231035996	5.134326058	5.134657618			5.124745594	5.228688517	5.086589317	5.08267923	5.081836958	5.090745993	5.068901814	5.188348072	5.31657482	5.083517091	5.019330183	5.141346844
ZIC5	4.671521376	4.670696999	4.668531973	4.674165658	4.672976353	4.669210836	4.755640931	4.67214456	4.676228538	4.674375544	4.674819923	4.675030326			4.752127066	4.756836295	4.678036016	4.675451203	4.758953191	4.680784654	4.666349345	4.67733381	4.756261215	4.676005019	4.574638121	4.679276406
ANGPT1	4.575802893	4.575083476	4.57319416	4.674165658	4.577072651	4.573786562	4.576141497	4.576346741	4.676228538	4.674375544	4.578681588	4.578865217			4.573378088	4.577081647	4.581488511	4.579232538	4.578746679	4.583887599	4.571289567	4.67733381	4.672468385	4.676005019	4.670186661	4.679276406
TEDDM1	4.671521376	4.670696999	4.751893173	4.674165658	4.672976353	4.752646498	4.755640931	4.67214456	4.579910968	4.674375544	4.758870438	4.675030326			4.668742746	4.900749543	4.762438758	4.675451203	4.758953191	4.765488247	4.749471072	4.67733381	4.831447986	4.760185353	4.670186661	4.679276406
TRIM67-AS1	4.898853994	4.897787478	4.958089577	4.902274621	4.900736207	4.895864666	4.962727433	4.755901895	4.835984234	4.902546106	4.966723249	4.834538784			4.958379046	4.964206513	4.907280352	4.903937406	5.026137212	4.841479839	5.013779632	4.97017379	5.227812396	5.027742458	4.897127216	4.839660693
GABRG1	4.575802893	4.575083476	4.57319416	4.578110585	4.577072651	4.669210836	4.671909376	4.576346741	4.579910968	4.57829376	4.578681588	4.675030326			4.573378088	4.672986662	4.678036016	4.675451203	4.758953191	4.583887599	4.666349345	4.67733381	4.672468385	4.676005019	4.82869499	4.679276406
PANX2	5.544303408	5.50751358	5.467038197	5.549702221	5.614616095	5.573603287	5.579212308	5.474144933	5.5539113	5.51488844	5.585257181	5.516200433			5.572629907	5.646919862	5.591930826	5.443039689	5.618664536	5.631081863	5.567650881	5.718565495	5.737701541	5.587717059	5.506489885	5.488156325
ZNF114	4.575802893	4.575083476	4.668531973	4.578110585	4.672976353	4.669210836	4.671909376	4.67214456	4.579910968	4.57829376	4.674819923	4.578865217			4.573378088	4.577081647	4.678036016	4.579232538	4.674894505	4.583887599	4.666349345	4.67733381	4.576629343	4.676005019	4.670186661	4.582571142
CCDC27	5.226211339	5.127827214	5.309517974	5.183169958	5.228671091	5.073234723	5.179480794	5.315994494	5.136545634	5.183513073	5.134326058	5.082042457			5.35146356	5.228688517	5.237220415	5.185271371	5.134443588	5.287615833	5.425505584	5.188348072	5.18039492	5.027742458	5.127022547	5.088465276
CFAP161	4.671521376	4.829310755	4.668531973	4.578110585	4.577072651	4.573786562	4.755640931	4.755901895	4.760433352	4.674375544	4.758870438	4.759103891			4.752127066	4.672986662	4.678036016	4.675451203	4.674894505	4.765488247	4.749471072	4.67733381	4.672468385	4.676005019	4.670186661	4.679276406
NEUROD2	5.021260339	4.961062731	5.016936974	4.902274621	5.131420513	4.959021888	5.021821388	5.07767559	4.968656783	5.025386996	5.134326058	4.903393038			5.072526028	5.078950039	5.086589317	5.026941938	5.081836958	5.143722048	5.068901814	5.188348072	5.130619815	5.027742458	4.960361946	5.03247027
C5orf17	4.755210397	4.754295638	4.668531973	4.833495658	4.756824857	4.752646498	4.899355941	4.899660188	4.760433352	4.674375544	4.674819923	4.759103891			4.895259013	4.756836295	4.762438758	4.835046512	4.903217362	4.841479839	4.892161979	4.761659666	4.831447986	4.676005019	4.82869499	4.763814935
LINC00208	5.021260339	4.961062731	5.124413185	4.965825102	4.96419236	5.017918872	4.962727433	4.831057292	4.835984234	5.025386996	4.966723249	4.967012072			4.958379046	5.023379039	4.971137515	4.903937406	5.081836958	5.034649503	5.013779632	4.97017379	5.02262968	5.027742458	5.019330183	4.97283973
DNAH6	4.575802893	4.575083476	4.57319416	4.674165658	4.577072651	4.573786562	4.671909376	4.67214456	4.579910968	4.57829376	4.578681588	4.675030326			4.573378088	4.577081647	4.678036016	4.579232538	4.674894505	4.583887599	4.571289567	4.580875628	4.672468385	4.579715888	4.670186661	4.582571142
LRRC15	4.755210397	4.829310755	4.826698385	4.833495658	4.756824857	4.895864666	4.830773541	4.963050343	4.760433352	4.758377372	4.834284959	4.834538784			4.895259013	4.832073274	4.838164539	4.835046512	4.758953191	4.841479839	4.824064554	4.837317508	4.756261215	4.8357146	4.82869499	4.908884374
CFAP46	4.755210397	4.829310755	4.958089577	4.902274621	4.832060837	4.959021888	4.830773541	4.755901895	4.835984234	4.902546106	4.758870438	4.834538784			4.958379046	4.964206513	4.838164539	4.759570873	4.966825629	4.910834624	4.892161979	4.97017379	5.02262968	4.9046537	4.75372934	4.839660693
B3GNT7	4.898853994	4.829310755	4.826698385	4.674165658	4.756824857	4.752646498	4.755640931	4.755901895	4.835984234	4.758377372	4.834284959	4.759103891			4.826952719	5.023379039	4.838164539	4.759570873	4.674894505	4.680784654	4.824064554	4.837317508	4.756261215	4.760185353	4.75372934	4.763814935
CBLL2	4.830305409	4.897787478	4.826698385	4.965825102	4.900736207	4.959021888	5.021821388	5.022161454	4.904942788	5.025386996	4.966723249	5.02633355			4.958379046	5.078950039	5.030677827	4.9675898	4.966825629	4.841479839	5.013779632	5.08552719	5.078165685	4.968349985	4.960361946	4.839660693
ZMYM6	4.755210397	4.754295638	4.751893173	4.833495658	4.832060837	4.752646498	4.755640931	4.67214456	4.760433352	4.758377372	4.758870438	4.834538784			4.752127066	4.756836295	4.762438758	4.675451203	4.674894505	4.765488247	4.666349345	4.67733381	4.672468385	4.760185353	4.75372934	4.763814935
SGCZ	4.575802893	4.575083476	4.668531973	4.578110585	4.577072651	4.573786562	4.671909376	4.67214456	4.676228538	4.57829376	4.674819923	4.675030326			4.573378088	4.672986662	4.581488511	4.675451203	4.758953191	4.583887599	4.666349345	4.67733381	4.672468385	4.579715888	4.670186661	4.679276406
LINC02551	4.575802893	4.575083476	4.57319416	4.578110585	4.577072651	4.573786562	4.576141497	4.576346741	4.579910968	4.57829376	4.578681588	4.578865217			4.573378088	4.577081647	4.581488511	4.579232538	4.578746679	4.583887599	4.571289567	4.580875628	4.576629343	4.579715888	4.574638121	4.582571142
WNT9B	4.671521376	4.754295638	4.751893173	4.902274621	4.832060837	4.827517541	4.830773541	4.67214456	4.835984234	4.833748865	4.758870438	4.759103891			4.895259013	4.756836295	4.762438758	4.759570873	4.834374933	4.841479839	4.892161979	4.761659666	4.756261215	4.760185353	4.897127216	4.839660693
DNAJB13	5.356575472	5.313399888	5.351075678	5.401709994	5.317485076	5.431022032	5.473682467	5.474144933	5.186541852	5.440969431	5.441824765	5.277597336			5.430119888	5.317503549	5.326546993	5.404129882	5.36277721	5.45329702	5.498788233	5.367259387	5.645808616	5.405172167	5.354120326	5.284990894
CNPY3	7.782995127	7.726584613	7.996611439	7.965406458	7.852348338	7.755022856	7.757849898	7.898771753	8.012982326	7.900621963	8.079730286	7.956796523			8.126018287	8.171920443	8.064083575	8.004526284	7.979609825	8.283306917	7.847482896	7.874020976	7.753106687	8.270660209	8.146580729	8.174441183
SCAMP1	6.800469355	6.83685383	6.751295941	6.610501176	6.831034116	6.780163518	6.317489073	6.589275006	6.505529546	6.713718191	6.899966175	6.972933884			6.751939237	6.751245097	6.681567778	6.744934194	6.757030302	6.45057403	6.661130003	6.664803082	6.427179725	6.66086394	6.897791189	6.64068473
LINC00471	4.671521376	4.670696999	4.668531973	4.674165658	4.672976353	4.669210836	4.755640931	4.67214456	4.676228538	4.674375544	4.674819923	4.675030326			4.668742746	4.577081647	4.678036016	4.675451203	4.758953191	4.583887599	4.666349345	4.67733381	4.672468385	4.579715888	4.75372934	4.679276406
HAS3	4.898853994	4.829310755	4.894986292	4.833495658	5.023364134	4.827517541	5.021821388	5.07767559	4.968656783	4.966113228	4.903120894	4.834538784			5.01724184	5.023379039	4.907280352	4.903937406	4.834374933	5.034649503	4.892161979	4.906372237	4.900079099	4.9046537	4.897127216	4.97283973
FGF4	4.755210397	4.754295638	4.668531973	4.75814449	4.756824857	4.752646498	4.671909376	4.67214456	4.676228538	4.833748865	4.674819923	4.675030326			4.752127066	4.756836295	4.762438758	4.675451203	4.758953191	4.765488247	4.824064554	4.837317508	4.900079099	4.8357146	4.670186661	4.679276406
SLC30A8	4.755210397	4.754295638	4.751893173	4.674165658	4.756824857	4.752646498	4.755640931	4.755901895	4.760433352	4.902546106	4.758870438	4.759103891			4.752127066	4.832073274	4.678036016	4.759570873	4.758953191	4.680784654	4.824064554	4.761659666	4.900079099	4.676005019	4.670186661	4.763814935
LOC439933	4.575802893	4.575083476	4.57319416	4.578110585	4.577072651	4.573786562	4.576141497	4.576346741	4.579910968	4.57829376	4.578681588	4.578865217			4.573378088	4.577081647	4.581488511	4.579232538	4.578746679	4.583887599	4.571289567	4.580875628	4.576629343	4.579715888	4.574638121	4.679276406
C11orf65	4.575802893	4.575083476	4.57319416	4.578110585	4.672976353	4.573786562	4.576141497	4.576346741	4.579910968	4.57829376	4.578681588	4.578865217			4.573378088	4.577081647	4.678036016	4.579232538	4.578746679	4.583887599	4.571289567	4.67733381	4.576629343	4.579715888	4.574638121	4.582571142
FAM71E2	4.671521376	4.670696999	4.668531973	4.674165658	4.672976353	4.669210836	4.755640931	4.67214456	4.676228538	4.674375544	4.758870438	4.675030326			4.668742746	4.756836295	4.678036016	4.675451203	4.758953191	4.680784654	4.749471072	4.761659666	4.756261215	4.676005019	4.574638121	4.582571142
OR5P2	4.575802893	4.754295638	4.751893173	4.674165658	4.756824857	4.669210836	4.755640931	4.67214456	4.760433352	4.758377372	4.674819923	4.759103891			4.895259013	4.756836295	4.762438758	4.759570873	4.758953191	4.841479839	4.666349345	4.67733381	4.96349495	4.760185353	4.75372934	4.679276406
DYDC1	4.575802893	4.670696999	4.57319416	4.674165658	4.577072651	4.573786562	4.671909376	4.67214456	4.579910968	4.674375544	4.578681588	4.578865217			4.573378088	4.577081647	4.678036016	4.675451203	4.578746679	4.680784654	4.666349345	4.580875628	4.576629343	4.579715888	4.75372934	4.679276406
IL27	5.271483177	5.313399888	5.351075678	5.276091045	5.317485076	5.267455142	5.226867339	5.22726495	5.234167106	5.231035996	5.32078794	5.321164816			5.35146356	5.399490075	5.282831612	5.51704363	5.515928306	5.414162219	5.217463012	5.367259387	5.437297567	5.405172167	5.394215697	5.328767218
IQCF1	5.021260339	5.02006822	5.016936974	5.025083574	5.023364134	4.895864666	5.021821388	4.963050343	4.904942788	5.025386996	4.966723249	4.903393038			5.072526028	5.131436762	5.030677827	5.026941938	5.026137212	5.090745993	5.120970451	5.08552719	5.227812396	4.968349985	5.127022547	5.141346844
DEFB125	4.575802893	4.575083476	4.668531973	4.578110585	4.672976353	4.669210836	4.671909376	4.67214456	4.676228538	4.674375544	4.674819923	4.675030326			4.573378088	4.672986662	4.581488511	4.675451203	4.674894505	4.680784654	4.824064554	4.67733381	4.672468385	4.676005019	4.82869499	4.582571142
WFDC10B	4.671521376	4.670696999	4.751893173	4.75814449	4.672976353	4.669210836	4.576141497	4.67214456	4.676228538	4.674375544	4.674819923	4.675030326			4.668742746	4.672986662	4.678036016	4.675451203	4.674894505	4.680784654	4.666349345	4.67733381	4.672468385	4.676005019	4.670186661	4.582571142
PKHD1	4.830305409	4.754295638	4.826698385	4.833495658	4.900736207	4.827517541	4.830773541	4.831057292	4.835984234	4.902546106	4.834284959	4.759103891			4.958379046	4.832073274	4.907280352	4.903937406	4.834374933	4.841479839	4.824064554	4.906372237	5.130619815	4.8357146	4.960361946	4.763814935
PKD1L1	4.671521376	4.670696999	4.57319416	4.674165658	4.672976353	4.669210836	4.755640931	4.67214456	4.579910968	4.674375544	4.674819923	4.675030326			4.668742746	4.672986662	4.678036016	4.675451203	4.758953191	4.583887599	4.824064554	4.67733381	4.672468385	4.676005019	4.670186661	4.582571142
ADGRG4	4.671521376	4.670696999	4.668531973	4.674165658	4.672976353	4.752646498	4.755640931	4.67214456	4.760433352	4.674375544	4.758870438	4.675030326			4.668742746	4.672986662	4.762438758	4.759570873	4.758953191	4.765488247	4.749471072	4.761659666	4.756261215	4.760185353	4.75372934	4.679276406
TENM1	4.962194691	4.829310755	4.826698385	4.902274621	4.832060837	4.959021888	4.899355941	4.899660188	4.904942788	4.902546106	4.758870438	4.834538784			4.895259013	4.756836295	4.838164539	4.9675898	4.903217362	4.910834624	4.95509176	4.906372237	4.96349495	4.9046537	4.960361946	4.908884374
REXO1L1P	4.830305409	4.754295638	4.826698385	4.833495658	4.756824857	4.895864666	4.830773541	4.67214456	4.676228538	4.902546106	4.758870438	4.834538784			4.752127066	4.756836295	4.762438758	4.835046512	4.834374933	4.765488247	4.824064554	4.837317508	4.831447986	4.8357146	4.82869499	4.763814935
TAF1L	4.830305409	4.829310755	4.894986292	4.902274621	4.832060837	4.827517541	4.830773541	4.899660188	4.904942788	4.833748865	4.758870438	4.834538784			4.895259013	4.756836295	4.838164539	4.759570873	4.903217362	4.910834624	4.749471072	4.97017379	4.900079099	4.8357146	4.897127216	4.839660693
CNTNAP5	5.021260339	4.961062731	5.016936974	5.08073415	5.023364134	5.073234723	5.021821388	5.07767559	4.968656783	5.025386996	5.081724113	5.134657618			5.072526028	5.023379039	5.086589317	5.135320824	5.026137212	5.090745993	5.013779632	5.029663003	5.227812396	5.083517091	5.019330183	5.03247027
RECQL4	5.578406099	5.703930746	5.757932629	5.680916057	5.678329243	5.759471391	5.706606546	5.579700943	5.518600723	5.771166046	5.682338706	5.713489757			5.669112897	5.76802324	5.689327521	5.744366285	5.618664536	5.631081863	5.752982825	5.834420979	5.928674311	5.803420853	5.575632073	5.594503102
ADGRF3	5.021260339	5.075484552	5.016936974	5.025083574	5.023364134	4.959021888	5.129738602	5.022161454	4.904942788	5.081051734	5.184239499	5.02633355			5.072526028	5.023379039	5.139393123	5.185271371	5.134443588	5.143722048	5.120970451	5.08552719	5.18039492	5.027742458	5.176663242	5.03247027
TMC2	5.076732377	5.075484552	5.173956297	5.08073415	5.078934438	5.175066943	4.962727433	4.963050343	5.028065533	5.133625759	5.081724113	4.903393038			5.266638909	5.228688517	5.139393123	5.026941938	5.184361414	5.143722048	5.170384704	5.281608998	5.227812396	5.083517091	5.127022547	5.03247027
SMCR5	4.755210397	4.754295638	4.751893173	4.75814449	4.672976353	4.752646498	4.755640931	4.755901895	4.676228538	4.758377372	4.758870438	4.834538784			4.752127066	4.672986662	4.762438758	4.759570873	4.758953191	4.841479839	4.666349345	4.67733381	4.756261215	4.676005019	4.670186661	4.679276406
BICD2	5.129126928	5.075484552	5.221155733	5.08073415	5.131420513	5.125483784	5.077319638	5.17986539	5.083855234	5.133625759	5.231786974	5.082042457			5.221512266	5.181242373	5.030677827	5.185271371	5.184361414	5.193985542	4.95509176	5.188348072	4.900079099	5.233789464	4.960361946	5.239315252
ZIM3	4.575802893	4.575083476	4.57319416	4.674165658	4.577072651	4.573786562	4.671909376	4.576346741	4.676228538	4.57829376	4.674819923	4.675030326			4.573378088	4.577081647	4.581488511	4.579232538	4.578746679	4.583887599	4.571289567	4.580875628	4.672468385	4.579715888	4.574638121	4.582571142
NOX5	4.755210397	4.754295638	4.751893173	4.674165658	4.756824857	4.752646498	4.830773541	4.755901895	4.760433352	4.758377372	4.758870438	4.759103891			4.668742746	4.756836295	4.762438758	4.675451203	4.758953191	4.765488247	4.749471072	4.761659666	4.831447986	4.676005019	4.670186661	4.763814935
DAOA-AS1	4.575802893	4.575083476	4.57319416	4.578110585	4.672976353	4.573786562	4.576141497	4.576346741	4.579910968	4.57829376	4.578681588	4.675030326			4.573378088	4.577081647	4.678036016	4.579232538	4.758953191	4.680784654	4.666349345	4.580875628	4.672468385	4.579715888	4.82869499	4.763814935
ADGRG6	4.575802893	4.575083476	4.668531973	4.578110585	4.577072651	4.669210836	4.671909376	4.67214456	4.676228538	4.57829376	4.674819923	4.675030326			4.752127066	4.756836295	4.678036016	4.675451203	4.758953191	4.680784654	4.666349345	4.67733381	4.672468385	4.676005019	4.670186661	4.582571142
KLHL4	4.755210397	4.829310755	4.751893173	4.75814449	4.832060837	4.827517541	4.755640931	4.831057292	4.676228538	4.758377372	4.834284959	4.675030326			4.752127066	4.832073274	4.838164539	4.835046512	4.903217362	4.765488247	4.824064554	4.837317508	4.831447986	4.8357146	4.82869499	4.763814935
GPR156	4.671521376	4.575083476	4.668531973	4.674165658	4.672976353	4.752646498	4.671909376	4.67214456	4.676228538	4.674375544	4.674819923	4.675030326			4.752127066	4.672986662	4.762438758	4.675451203	4.758953191	4.680784654	4.666349345	4.761659666	4.756261215	4.760185353	4.75372934	4.679276406
SUOX	5.226211339	5.224817412	5.221155733	5.230681282	5.228671091	5.352324918	5.226867339	5.22726495	5.405592794	5.276456696	5.134326058	5.184583429			5.35146356	5.181242373	5.326546993	5.185271371	5.134443588	5.193985542	5.386982099	5.236034308	5.18039492	5.405172167	5.223954398	5.450397638
ADGRF4	4.898853994	4.897787478	4.958089577	4.902274621	4.900736207	4.959021888	4.899355941	4.963050343	4.760433352	4.902546106	4.903120894	4.903393038			4.958379046	4.900749543	4.907280352	5.026941938	4.903217362	4.974909316	4.95509176	4.97017379	5.130619815	4.968349985	4.897127216	4.908884374
IL31RA	4.671521376	4.670696999	4.668531973	4.75814449	4.756824857	4.669210836	4.671909376	4.67214456	4.676228538	4.57829376	4.674819923	4.675030326			4.573378088	4.577081647	4.678036016	4.675451203	4.674894505	4.680784654	4.571289567	4.580875628	4.756261215	4.579715888	4.574638121	4.679276406
SYTL5	4.671521376	4.670696999	4.57319416	4.674165658	4.672976353	4.669210836	4.671909376	4.67214456	4.579910968	4.674375544	4.674819923	4.675030326			4.668742746	4.756836295	4.678036016	4.675451203	4.674894505	4.765488247	4.666349345	4.580875628	4.756261215	4.676005019	4.670186661	4.679276406
SDCCAG8	5.076732377	4.961062731	5.016936974	5.230681282	5.023364134	4.827517541	5.021821388	5.022161454	4.904942788	4.966113228	5.134326058	4.903393038			4.958379046	4.900749543	5.030677827	4.9675898	5.081836958	4.910834624	4.824064554	5.029663003	4.900079099	4.968349985	4.897127216	4.839660693
ADGRF2	4.671521376	4.754295638	4.57319416	4.674165658	4.756824857	4.669210836	4.576141497	4.755901895	4.676228538	4.674375544	4.674819923	4.675030326			4.668742746	4.672986662	4.581488511	4.675451203	4.674894505	4.680784654	4.666349345	4.67733381	4.756261215	4.760185353	4.574638121	4.679276406
SYN2	4.830305409	4.897787478	4.826698385	4.965825102	4.900736207	4.959021888	4.830773541	4.831057292	4.968656783	4.833748865	4.903120894	4.903393038			4.895259013	4.964206513	4.838164539	4.903937406	4.966825629	4.910834624	4.892161979	4.906372237	4.900079099	4.9046537	4.960361946	4.763814935
ASB10	6.508412054	6.456347717	6.499790925	6.466214763	6.576254086	6.726042909	6.692123733	6.526391167	6.43777166	6.483620352	6.565981188	6.381306193			6.51654503	6.709541766	6.591014316	6.598966024	6.715277703	6.774842332	6.758067749	6.588968695	6.707982263	6.675529427	6.536699526	6.393083749
HTR3C	4.962194691	5.02006822	5.016936974	5.08073415	5.023364134	4.959021888	4.962727433	4.963050343	5.083855234	5.025386996	4.966723249	5.082042457			5.174301141	5.181242373	5.030677827	5.08267923	5.320921533	4.974909316	5.013779632	5.029663003	5.227812396	5.027742458	5.019330183	5.03247027
NFKBID	5.472919445	5.313399888	5.538195299	5.440565417	5.274018851	5.267455142	5.357289055	5.315994494	5.405592794	5.440969431	5.362640132	5.516200433			5.729367494	5.51210479	5.448012409	5.443039689	5.36277721	5.695294815	5.217463012	5.590474215	5.273133659	5.364818036	5.394215697	5.41132636
CD300LF	8.029657085	8.193403129	9.054893646	8.979181207	8.76786918	8.236311496	8.236659775	8.339191714	8.687524247	8.630146901	8.995975044	8.510171654			8.917709147	9.135052887	8.895633184	8.604519489	8.923252722	8.823529	8.57042925	8.691654585	8.798764309	9.003321036	9.408095256	9.130459249
GJA10	4.755210397	4.897787478	4.826698385	4.75814449	4.832060837	4.827517541	4.830773541	4.755901895	4.676228538	4.758377372	4.834284959	4.759103891			4.958379046	4.964206513	4.907280352	4.835046512	4.966825629	4.974909316	4.824064554	4.906372237	4.96349495	4.760185353	4.82869499	4.679276406
WNT9A	4.830305409	4.829310755	4.894986292	4.902274621	4.832060837	4.827517541	4.755640931	4.831057292	4.835984234	4.833748865	4.834284959	4.834538784			4.895259013	4.756836295	4.838164539	4.903937406	4.966825629	4.841479839	5.013779632	4.906372237	4.831447986	4.9046537	4.897127216	4.763814935
GAL3ST2	5.129126928	5.313399888	5.266271351	5.319615918	5.399470662	5.310735353	5.179480794	5.22726495	5.234167106	5.276456696	5.32078794	5.232142525			5.266638909	5.317503549	5.282831612	5.27833044	5.277360745	5.373596428	5.262464373	5.236034308	5.437297567	5.186176547	5.127022547	5.141346844
PIP4K2B	5.271483177	5.395177263	5.351075678	5.401709994	5.475780357	5.539582822	5.436220996	5.397904141	5.365228746	5.440969431	5.402941657	5.321164816			5.391494528	5.359270028	5.326546993	5.480644295	5.320921533	5.491116316	5.425505584	5.446661785	5.580373693	5.322910499	5.269156525	5.239315252
ODF3	4.755210397	4.829310755	4.826698385	4.833495658	4.900736207	4.752646498	4.899355941	4.899660188	4.904942788	4.758377372	4.834284959	4.759103891			4.895259013	4.900749543	4.762438758	4.835046512	4.834374933	4.841479839	4.824064554	4.837317508	4.831447986	4.8357146	4.897127216	4.839660693
WFDC13	4.671521376	4.575083476	4.668531973	4.674165658	4.672976353	4.573786562	4.576141497	4.67214456	4.676228538	4.674375544	4.674819923	4.675030326			4.573378088	4.672986662	4.581488511	4.579232538	4.674894505	4.680784654	4.666349345	4.580875628	4.672468385	4.676005019	4.75372934	4.679276406
CCDC197	4.671521376	4.754295638	4.751893173	4.75814449	4.756824857	4.752646498	4.755640931	4.755901895	4.760433352	4.758377372	4.758870438	4.759103891			4.826952719	4.832073274	4.762438758	4.759570873	4.903217362	4.765488247	4.749471072	4.761659666	4.831447986	4.760185353	4.75372934	4.763814935
SLFN5	6.719159669	6.236991504	6.149383231	6.053605434	6.479626591	6.291230383	5.875697938	6.025276168	5.885918494	6.07700285	6.122713313	6.381306193			5.758410422	5.61463786	5.991983501	5.683711093	6.055441421	5.756266266	5.462741452	6.214215272	5.978306672	5.96234635	5.845029945	6.337638267
SERPINB12	4.671521376	4.829310755	4.751893173	4.75814449	4.672976353	4.752646498	4.671909376	4.755901895	4.676228538	4.674375544	4.674819923	4.675030326			4.668742746	4.756836295	4.678036016	4.759570873	4.674894505	4.765488247	4.749471072	4.761659666	4.756261215	4.676005019	4.574638121	4.582571142
GIPC3	4.755210397	4.754295638	4.751893173	4.674165658	4.832060837	4.752646498	4.755640931	4.755901895	4.760433352	4.758377372	4.758870438	4.675030326			4.826952719	4.832073274	4.678036016	4.759570873	4.834374933	4.841479839	4.749471072	4.761659666	4.831447986	4.8357146	4.670186661	4.679276406
PGLYRP3	4.671521376	4.670696999	4.668531973	4.674165658	4.672976353	4.669210836	4.830773541	4.67214456	4.760433352	4.674375544	4.674819923	4.675030326			4.668742746	4.756836295	4.762438758	4.675451203	4.674894505	4.680784654	4.824064554	4.67733381	4.831447986	4.676005019	4.670186661	4.679276406
PSKH2	4.755210397	4.754295638	4.826698385	4.902274621	4.756824857	4.827517541	4.830773541	4.831057292	4.835984234	4.833748865	4.834284959	4.834538784			4.895259013	4.900749543	4.838164539	4.835046512	4.834374933	4.974909316	4.824064554	4.906372237	4.900079099	4.8357146	4.82869499	4.763814935
OR6W1P	4.830305409	4.829310755	4.826698385	4.833495658	4.832060837	4.827517541	4.830773541	4.831057292	4.760433352	4.833748865	4.834284959	4.834538784			4.895259013	4.900749543	4.907280352	4.903937406	4.903217362	4.841479839	4.892161979	4.837317508	4.831447986	4.8357146	4.897127216	4.97283973
MOGAT1	5.076732377	5.02006822	5.221155733	5.230681282	5.181225517	5.017918872	5.129738602	5.17986539	5.028065533	5.025386996	5.081724113	5.082042457			5.266638909	5.131436762	5.189495458	5.135320824	5.026137212	5.034649503	5.347058047	5.029663003	5.273133659	5.083517091	5.074712018	4.908884374
GPR78	4.898853994	5.02006822	4.894986292	5.08073415	4.96419236	5.017918872	5.077319638	4.899660188	4.968656783	4.966113228	5.026029397	4.903393038			4.958379046	4.964206513	4.971137515	4.9675898	4.903217362	5.090745993	5.013779632	4.97017379	5.078165685	4.9046537	4.960361946	4.97283973
H1-8	4.898853994	4.897787478	4.958089577	4.902274621	4.832060837	4.959021888	4.962727433	4.899660188	4.904942788	4.902546106	4.834284959	4.967012072			4.958379046	4.832073274	4.907280352	4.903937406	4.966825629	4.974909316	5.013779632	4.906372237	4.96349495	5.027742458	4.897127216	4.839660693
TAAR9	4.671521376	4.829310755	4.826698385	4.75814449	4.832060837	4.752646498	4.830773541	4.831057292	4.676228538	4.758377372	4.758870438	4.903393038			4.752127066	4.756836295	4.907280352	4.759570873	4.834374933	4.765488247	5.013779632	4.761659666	4.900079099	4.9046537	5.019330183	4.763814935
GNRHR2	5.076732377	5.02006822	5.124413185	5.025083574	5.078934438	5.125483784	5.077319638	5.022161454	5.028065533	5.025386996	5.184239499	5.02633355			5.072526028	5.181242373	5.086589317	5.026941938	5.134443588	5.090745993	5.120970451	5.13828695	5.130619815	5.083517091	5.269156525	4.97283973
MYOZ3	4.755210397	4.754295638	4.751893173	4.674165658	4.832060837	4.752646498	4.755640931	4.755901895	4.760433352	4.758377372	4.758870438	4.759103891			4.752127066	4.832073274	4.838164539	4.759570873	4.674894505	4.680784654	4.749471072	4.67733381	4.756261215	4.760185353	4.75372934	4.763814935
BNIPL	4.755210397	4.670696999	4.751893173	4.75814449	4.756824857	4.752646498	4.755640931	4.67214456	4.760433352	4.758377372	4.758870438	4.759103891			4.752127066	4.832073274	4.838164539	4.759570873	4.758953191	4.765488247	4.666349345	4.761659666	4.672468385	4.760185353	4.75372934	4.679276406
ASB11	4.671521376	4.670696999	4.668531973	4.75814449	4.756824857	4.752646498	4.755640931	4.755901895	4.676228538	4.674375544	4.758870438	4.759103891			4.826952719	4.832073274	4.762438758	4.675451203	4.674894505	4.765488247	4.824064554	4.67733381	4.756261215	4.676005019	4.75372934	4.763814935
OFCC1	4.575802893	4.575083476	4.57319416	4.578110585	4.577072651	4.573786562	4.576141497	4.576346741	4.579910968	4.57829376	4.578681588	4.578865217			4.573378088	4.672986662	4.581488511	4.579232538	4.674894505	4.583887599	4.571289567	4.580875628	4.576629343	4.579715888	4.574638121	4.763814935
SDR9C7	4.575802893	4.670696999	4.668531973	4.674165658	4.672976353	4.669210836	4.671909376	4.67214456	4.579910968	4.674375544	4.674819923	4.675030326			4.668742746	4.672986662	4.678036016	4.579232538	4.578746679	4.680784654	4.571289567	4.67733381	4.672468385	4.676005019	4.574638121	4.582571142
OR5P3	4.830305409	4.829310755	4.894986292	4.833495658	4.96419236	4.895864666	4.962727433	4.899660188	4.676228538	4.833748865	4.834284959	4.834538784			4.895259013	5.023379039	4.838164539	4.903937406	4.903217362	4.910834624	5.170384704	5.029663003	5.078165685	4.760185353	5.074712018	4.908884374
TRIM40	4.671521376	4.670696999	4.668531973	4.674165658	4.672976353	4.669210836	4.671909376	4.67214456	4.676228538	4.674375544	4.674819923	4.675030326			4.752127066	4.672986662	4.581488511	4.759570873	4.758953191	4.680784654	4.666349345	4.67733381	4.756261215	4.676005019	4.75372934	4.679276406
CSN1S2AP	4.671521376	4.670696999	4.668531973	4.75814449	4.577072651	4.669210836	4.671909376	4.67214456	4.579910968	4.674375544	4.674819923	4.675030326			4.668742746	4.672986662	4.678036016	4.675451203	4.674894505	4.765488247	4.666349345	4.67733381	4.756261215	4.676005019	4.670186661	4.582571142
WFDC12	5.472919445	5.576692866	5.467038197	5.649447106	5.547274504	5.310735353	5.644609838	5.315994494	5.5539113	5.478530615	5.515778871	5.403337706			5.841642826	5.61463786	5.591930826	5.443039689	5.68250086	5.527720859	5.808958171	5.718565495	5.953732007	5.444105384	5.470294105	5.41132636
CRYGN	4.755210397	4.829310755	4.751893173	4.75814449	4.672976353	4.669210836	4.755640931	4.831057292	4.760433352	4.674375544	4.758870438	4.759103891			4.752127066	4.832073274	4.762438758	4.759570873	4.674894505	4.841479839	4.824064554	4.761659666	4.756261215	4.760185353	4.75372934	4.763814935
STARD6	4.671521376	4.754295638	4.668531973	4.674165658	4.672976353	4.573786562	4.671909376	4.67214456	4.579910968	4.674375544	4.674819923	4.578865217			4.668742746	4.672986662	4.678036016	4.675451203	4.674894505	4.583887599	4.666349345	4.67733381	4.576629343	4.676005019	4.670186661	4.679276406
C11orf40	4.671521376	4.670696999	4.668531973	4.674165658	4.672976353	4.669210836	4.576141497	4.67214456	4.579910968	4.57829376	4.578681588	4.578865217			4.573378088	4.672986662	4.678036016	4.579232538	4.578746679	4.680784654	4.571289567	4.761659666	4.672468385	4.579715888	4.670186661	4.582571142
C18orf12	4.755210397	4.670696999	4.751893173	4.674165658	4.756824857	4.752646498	4.671909376	4.67214456	4.760433352	4.674375544	4.758870438	4.675030326			4.752127066	4.832073274	4.678036016	4.759570873	4.758953191	4.680784654	4.824064554	4.761659666	4.900079099	4.760185353	4.897127216	4.679276406
BCL2L11	5.874778949	5.949412514	5.968617037	5.957867742	5.95497008	5.842741071	5.927324133	5.676519456	5.859182544	5.958378963	5.882587162	5.934858193			5.969136281	6.117989662	6.016213107	6.102226549	5.959642808	5.998723366	6.078909032	5.888531134	6.159683089	6.011184936	5.923161283	5.919372936
DEFB119	4.755210397	4.670696999	4.668531973	4.674165658	4.672976353	4.752646498	4.671909376	4.755901895	4.676228538	4.674375544	4.674819923	4.675030326			4.668742746	4.672986662	4.678036016	4.759570873	4.674894505	4.680784654	4.666349345	4.67733381	4.672468385	4.760185353	4.670186661	4.679276406
TIGD1	6.492040703	6.044859365	6.06214768	6.185144329	6.117963088	5.842741071	5.976931653	5.794581246	6.011738524	5.881535833	5.742956335	6.03249082			5.993168695	6.07347579	6.108830058	6.102226549	5.959642808	6.046849157	5.888458397	6.014475155	5.737701541	5.937209136	5.672257627	5.660391662
ALKBH5	7.630698503	7.381253939	7.246924945	7.284498339	7.362605768	7.34995477	7.436549963	7.368641777	7.417170992	7.384912461	7.305330375	7.287362695			7.530661463	7.529582889	7.660538148	7.614738901	7.496146019	7.532289071	7.322538424	7.42088656	7.421575521	7.555586495	7.362056641	7.32009992
CCDC69	7.743044917	7.719753435	7.522138728	7.798859909	7.858615311	7.700785037	7.572358367	7.711056981	7.984372115	7.793040686	7.788013533	7.801900237			7.628323967	7.693088944	7.703597131	7.722600003	7.72065921	7.474912839	7.530157862	7.44647108	7.360901592	7.778897359	7.704204942	7.700804801
NFX1	7.095910426	7.093243543	6.940631564	7.03893357	7.001212674	7.191024286	7.053877032	7.129542496	7.194056761	6.994156446	7.052160309	7.149303482			6.778727535	6.637108646	6.833573823	7.076200059	6.823938961	6.64511704	6.823375986	6.722600504	6.722019006	6.704400661	6.796369651	7.00965548
DSG2	4.671521376	4.575083476	4.668531973	4.674165658	4.577072651	4.669210836	4.576141497	4.576346741	4.676228538	4.674375544	4.674819923	4.578865217			4.668742746	4.756836295	4.678036016	4.675451203	4.674894505	4.680784654	4.666349345	4.580875628	4.672468385	4.676005019	4.670186661	4.679276406
C5orf24	6.353426432	6.506036243	6.466918101	6.625632836	6.666509513	6.565237854	6.747974987	6.634613481	6.853939817	7.028379207	6.960476158	6.72974495			6.433827987	6.027382459	6.216069575	6.327186463	6.207768632	6.181376654	5.72400799	6.23464411	5.928674311	6.401955633	6.255331052	6.411069882
KBTBD6	5.226211339	5.075484552	5.124413185	5.133294986	5.131420513	5.310735353	5.179480794	5.397904141	5.365228746	5.478530615	5.32078794	5.516200433			4.958379046	4.964206513	5.030677827	5.08267923	5.026137212	5.034649503	4.892161979	5.029663003	5.02262968	5.136193459	5.074712018	5.141346844
CDK8	5.764705875	5.673368755	5.538195299	5.617126507	5.512084125	5.504532086	5.509944966	5.579700943	5.5539113	5.550130578	5.515778871	5.856378445			5.605672533	5.67835167	5.55759732	5.363800328	5.184361414	5.563199189	5.632675277	5.281608998	5.437297567	5.405172167	5.575632073	5.627904316
PTK6	5.271483177	5.313399888	5.391097239	5.478118123	5.438275719	5.352324918	5.397461167	5.510416531	5.365228746	5.402105126	5.362640132	5.479817335			5.391494528	5.475800624	5.448012409	5.443039689	5.551189623	5.527720859	5.462741452	5.446661785	5.707839955	5.405172167	5.31248499	5.41132636
NKD1	5.076732377	5.224817412	5.173956297	5.276091045	5.078934438	5.175066943	5.179480794	5.17986539	5.186541852	5.183513073	5.134326058	5.082042457			5.174301141	5.078950039	5.086589317	5.185271371	5.231913008	5.241861901	5.217463012	5.236034308	5.31657482	5.083517091	5.176663242	4.97283973
STK38	7.630698503	7.481838981	7.458175547	7.275075789	7.497691601	7.393494478	7.385340378	7.542357706	7.745941071	7.596018302	7.574725253	7.896835318			7.23809931	7.388967798	7.32524884	7.316669369	7.248827217	7.178288113	7.417650468	7.403570418	7.250433946	7.372750865	7.405349015	7.502879878
THEM4	7.601172308	7.049982733	7.3027634	7.330692457	7.100612982	7.358770334	7.053877032	7.220348278	7.337565561	6.782600647	6.849595407	7.019146356			6.893265662	6.651903102	7.388388632	7.221399823	6.900198467	6.967279669	7.035986574	7.125309526	6.749672173	6.760394176	6.367835843	6.783966891
CLSPN	4.575802893	4.670696999	4.57319416	4.674165658	4.577072651	4.573786562	4.671909376	4.576346741	4.579910968	4.57829376	4.578681588	4.578865217			4.668742746	4.577081647	4.581488511	4.675451203	4.578746679	4.583887599	4.571289567	4.580875628	4.672468385	4.676005019	4.670186661	4.582571142
RBAK	6.11421114	5.973948374	5.728895689	5.854354113	5.95497008	6.041107813	5.736451746	6.093767116	6.291122331	6.030854631	5.984087218	6.05578349			5.758410422	5.581450289	5.916413596	5.683711093	5.551189623	5.563199189	5.694326353	5.748569239	5.707839955	5.621007329	5.672257627	5.752903276
WDR62	4.671521376	4.754295638	4.751893173	4.75814449	4.756824857	4.827517541	4.755640931	4.755901895	4.676228538	4.758377372	4.758870438	4.759103891			4.826952719	4.756836295	4.762438758	4.759570873	4.758953191	4.841479839	4.749471072	4.67733381	4.756261215	4.760185353	4.75372934	4.763814935
SLC39A12	4.671521376	4.575083476	4.57319416	4.578110585	4.672976353	4.573786562	4.671909376	4.576346741	4.579910968	4.57829376	4.578681588	4.675030326			4.573378088	4.577081647	4.678036016	4.579232538	4.674894505	4.583887599	4.666349345	4.67733381	4.672468385	4.676005019	4.670186661	4.679276406
RNF168	4.575802893	4.670696999	4.668531973	4.75814449	4.672976353	4.752646498	4.671909376	4.67214456	4.676228538	4.758377372	4.578681588	4.759103891			4.668742746	4.672986662	4.678036016	4.675451203	4.674894505	4.680784654	4.571289567	4.67733381	4.672468385	4.676005019	4.670186661	4.839660693
SVEP1	4.575802893	4.575083476	4.668531973	4.674165658	4.577072651	4.573786562	4.576141497	4.67214456	4.579910968	4.57829376	4.674819923	4.675030326			4.573378088	4.672986662	4.581488511	4.579232538	4.578746679	4.583887599	4.571289567	4.67733381	4.576629343	4.579715888	4.574638121	4.679276406
LOC652276	5.396730309	5.355059147	5.572191568	5.514467843	5.438275719	5.539582822	5.579212308	5.510416531	5.518600723	5.51488844	5.551037433	5.516200433			5.605672533	5.51210479	5.522220105	5.552325511	5.585412013	5.527720859	5.752982825	5.484342289	5.474781659	5.553455349	5.541576858	5.370827271
GATA4	5.314877587	5.355059147	5.391097239	5.361437534	5.359251073	5.392376773	5.226867339	5.357721561	5.186541852	5.276456696	5.277230825	5.232142525			5.391494528	5.317503549	5.282831612	5.27833044	5.44196831	5.373596428	5.462741452	5.484342289	5.546237355	5.405172167	5.354120326	5.328767218
TC2N	7.708877429	7.389913679	7.227811063	7.207298541	7.280555105	7.17109453	7.549315031	7.305666078	7.786333346	7.410933649	7.06321073	7.333574857			7.383310054	7.100646281	7.490492085	7.307425986	7.277487202	7.07118701	7.079149285	7.13587567	7.088271107	6.976007221	6.471653648	6.546965114
C9orf72	7.137897682	6.811031181	6.952384726	7.587730254	7.371435967	6.669717559	6.70629957	6.589275006	7.163518821	7.266283695	6.862359811	6.797976122			7.824726335	7.801234641	7.653233557	7.260281185	7.671347037	7.713113706	7.553150598	7.672608043	7.446805044	7.508008713	7.589078904	7.282445326
KCTD18	6.092171326	6.295286323	6.128114271	6.304739867	6.161010743	6.252696868	6.557509341	6.280062731	6.310353528	6.305311315	6.207571398	6.24860211			6.251432797	6.393530912	6.256639854	6.269518627	6.362758453	6.243805772	6.427028752	6.369495807	6.241740928	6.365826852	6.110766989	6.259953151
KLF11	4.671521376	4.754295638	4.751893173	4.75814449	4.756824857	4.827517541	4.755640931	4.755901895	4.760433352	4.758377372	4.834284959	4.759103891			4.752127066	4.832073274	4.762438758	4.759570873	4.758953191	4.765488247	4.666349345	4.837317508	4.756261215	4.8357146	4.82869499	4.763814935
ANKLE1	5.178846269	5.075484552	5.016936974	5.133294986	5.131420513	5.073234723	4.962727433	5.13010935	5.083855234	4.966113228	5.184239499	5.082042457			5.072526028	4.964206513	4.971137515	5.27833044	5.134443588	5.193985542	5.013779632	5.08552719	5.02262968	4.968349985	5.074712018	5.03247027
PLXNA3	4.898853994	4.897787478	4.826698385	4.902274621	4.900736207	4.895864666	4.830773541	4.831057292	4.835984234	4.902546106	4.834284959	4.903393038			4.895259013	4.832073274	4.907280352	4.835046512	4.966825629	4.974909316	4.749471072	4.837317508	4.831447986	4.8357146	4.82869499	4.679276406
PELO	4.671521376	4.575083476	4.668531973	4.674165658	4.756824857	4.573786562	4.671909376	4.67214456	4.676228538	4.674375544	4.674819923	4.675030326			4.573378088	4.672986662	4.678036016	4.675451203	4.674894505	4.765488247	4.666349345	4.67733381	4.576629343	4.676005019	4.670186661	4.679276406
LACC1	4.830305409	4.754295638	4.668531973	4.833495658	4.832060837	4.959021888	4.755640931	4.831057292	4.835984234	4.758377372	4.834284959	4.759103891			4.895259013	4.900749543	4.762438758	4.675451203	4.674894505	4.765488247	4.749471072	4.837317508	4.756261215	4.760185353	4.82869499	4.839660693
TAPT1-AS1	5.675163238	5.50751358	5.944128742	5.854354113	5.678329243	5.869303464	5.875697938	6.093767116	5.937748124	5.617569446	5.650849164	5.772647173			5.430119888	5.274036814	5.65773698	5.552325511	5.44196831	5.45329702	5.567650881	5.590474215	5.613543597	5.553455349	5.506489885	5.995026023
TEX55	4.671521376	4.670696999	4.668531973	4.674165658	4.672976353	4.752646498	4.671909376	4.67214456	4.676228538	4.674375544	4.674819923	4.578865217			4.668742746	4.672986662	4.678036016	4.675451203	4.674894505	4.680784654	4.666349345	4.67733381	4.672468385	4.676005019	4.670186661	4.582571142
RANBP3L	4.671521376	4.575083476	4.57319416	4.674165658	4.672976353	4.669210836	4.671909376	4.67214456	4.676228538	4.57829376	4.578681588	4.675030326			4.668742746	4.672986662	4.678036016	4.579232538	4.578746679	4.583887599	4.666349345	4.580875628	4.672468385	4.760185353	4.75372934	4.679276406
SNX13	5.735584141	5.64200922	5.467038197	5.649447106	5.475780357	5.573603287	5.509944966	5.510416531	5.588180918	5.478530615	5.515778871	5.551466769			5.503592782	5.547295551	5.625290019	5.586567617	5.585412013	5.631081863	5.533732514	5.623809594	5.398514037	5.684914848	5.575632073	5.660391662
KDM1B	4.830305409	4.829310755	5.072206902	5.183169958	5.078934438	4.827517541	4.755640931	4.963050343	4.968656783	4.966113228	5.134326058	5.082042457			4.895259013	4.832073274	5.086589317	4.903937406	4.758953191	4.910834624	4.749471072	5.029663003	5.02262968	5.136193459	5.074712018	5.088465276
ATP6V0D2	4.755210397	4.670696999	4.668531973	4.75814449	4.672976353	4.752646498	4.755640931	4.67214456	4.676228538	4.758377372	4.758870438	4.834538784			4.668742746	4.672986662	4.678036016	4.835046512	4.758953191	4.765488247	4.749471072	4.761659666	4.756261215	4.8357146	4.75372934	4.763814935
LHX4	5.021260339	5.02006822	5.016936974	4.965825102	4.96419236	5.017918872	5.021821388	4.899660188	5.083855234	5.025386996	5.026029397	4.903393038			5.072526028	5.023379039	5.237220415	5.135320824	5.081836958	5.034649503	5.170384704	5.029663003	5.078165685	4.968349985	5.019330183	4.908884374
CEP19	5.643777661	5.64200922	5.572191568	5.617126507	5.547274504	5.468374146	5.579212308	5.545576107	5.775356658	5.712046233	5.959461193	5.801190191			6.327391336	6.182044016	6.216069575	5.802153498	6.468285423	7.178288113	5.752982825	6.664803082	6.664994886	6.891224268	6.215616543	7.742825903
DNAH11	4.898853994	5.02006822	5.072206902	5.08073415	5.023364134	5.073234723	5.077319638	4.963050343	5.136545634	5.025386996	5.026029397	5.02633355			5.01724184	5.023379039	5.086589317	5.08267923	5.081836958	5.143722048	5.013779632	5.13828695	5.130619815	5.136193459	5.019330183	4.97283973
PROSER3	6.178188287	6.090059614	6.106494082	6.006627306	6.139663558	6.086250589	6.001031565	5.952942608	5.937748124	5.907671727	6.031965111	5.984604144			6.016759318	6.117989662	6.13098991	6.167474342	6.122905396	6.202515408	6.22531573	6.014475155	6.300116343	6.147519495	5.948167464	6.066466624
ADPRHL1	5.021260339	5.075484552	5.072206902	5.08073415	5.181225517	5.073234723	5.077319638	5.022161454	5.083855234	5.183513073	5.026029397	5.02633355			5.124745594	5.181242373	5.030677827	5.026941938	5.184361414	5.331466187	5.170384704	5.08552719	5.31657482	5.136193459	5.019330183	5.088465276
SYNRG	5.314877587	5.313399888	5.173956297	5.401709994	5.181225517	5.504532086	5.357289055	5.545576107	5.653866795	5.36182334	5.32078794	5.321164816			5.221512266	5.131436762	5.189495458	5.232853712	5.231913008	5.241861901	5.170384704	5.367259387	5.130619815	5.136193459	5.223954398	5.284990894
CDH24	5.076732377	5.02006822	5.072206902	4.965825102	4.96419236	5.017918872	5.077319638	4.963050343	4.835984234	5.081051734	4.903120894	4.967012072			5.072526028	5.023379039	5.030677827	5.026941938	5.026137212	5.034649503	5.068901814	5.029663003	5.130619815	5.027742458	5.019330183	4.97283973
SEPSECS	5.021260339	4.897787478	4.958089577	4.902274621	4.96419236	4.895864666	4.899355941	4.963050343	5.028065533	4.966113228	4.903120894	5.232142525			4.826952719	4.832073274	4.907280352	4.903937406	4.834374933	4.841479839	4.666349345	4.837317508	4.831447986	5.027742458	4.897127216	5.03247027
GRIK5	5.021260339	5.127827214	5.072206902	4.965825102	5.078934438	4.895864666	5.077319638	5.07767559	4.968656783	5.133625759	5.134326058	5.082042457			5.01724184	5.078950039	5.139393123	5.026941938	5.081836958	5.034649503	5.170384704	5.325289854	5.31657482	5.027742458	5.019330183	4.97283973
LRRN4	5.076732377	5.127827214	5.016936974	5.08073415	5.078934438	4.895864666	4.899355941	4.963050343	4.968656783	4.966113228	5.081724113	4.967012072			5.124745594	5.131436762	5.139393123	5.135320824	4.966825629	5.034649503	5.217463012	5.188348072	5.130619815	5.027742458	4.960361946	4.908884374
ZNF777	6.178188287	6.216977549	6.039393295	6.006627306	6.117963088	5.815601397	5.927324133	5.952942608	5.962890351	6.121568693	6.100612564	6.078664874			5.944643349	5.76802324	5.890190414	5.935873456	5.743122928	5.756266266	5.888458397	6.038242996	5.707839955	6.034925516	5.79009334	5.838913175
JPH2	5.178846269	5.177497987	5.072206902	5.08073415	5.181225517	5.175066943	5.179480794	5.13010935	5.234167106	5.133625759	5.026029397	5.02633355			5.072526028	5.181242373	5.086589317	5.185271371	5.320921533	5.193985542	5.262464373	5.08552719	5.227812396	5.136193459	5.019330183	5.03247027
PDE5A	4.755210397	4.829310755	4.958089577	4.833495658	4.756824857	4.827517541	4.830773541	4.831057292	4.760433352	4.833748865	4.834284959	4.759103891			4.826952719	4.832073274	4.838164539	4.835046512	4.903217362	4.910834624	4.95509176	4.761659666	4.756261215	4.760185353	4.82869499	4.839660693
SH2D1B	6.475469966	6.196656428	6.250863503	6.205840851	7.089909478	6.31008772	6.158221642	6.137503957	6.538183921	6.007147555	6.165826379	7.315270591			5.538626124	6.003704005	6.216069575	5.586567617	6.581855462	6.223321412	5.632675277	6.405659806	5.677224081	6.290517668	6.385702402	6.546965114
SSTR3	5.396730309	5.50751358	5.605226979	5.617126507	5.512084125	5.730415168	5.545095828	5.545576107	5.365228746	5.617569446	5.551037433	5.551466769			5.669112897	5.646919862	5.448012409	5.552325511	5.585412013	5.45329702	5.567650881	5.623809594	5.850378559	5.653388047	5.470294105	5.370827271
ADAMTS19	4.755210397	4.754295638	4.751893173	4.75814449	4.756824857	4.752646498	4.755640931	4.831057292	4.676228538	4.674375544	4.674819923	4.675030326			4.752127066	4.756836295	4.762438758	4.759570873	4.834374933	4.841479839	4.749471072	4.761659666	4.900079099	4.760185353	4.75372934	4.763814935
DDX31	4.830305409	4.829310755	4.894986292	4.902274621	4.832060837	4.895864666	4.899355941	4.831057292	4.835984234	4.833748865	4.834284959	4.903393038			4.958379046	4.964206513	4.907280352	4.903937406	4.966825629	4.841479839	4.95509176	5.029663003	4.900079099	4.9046537	4.960361946	4.763814935
UMODL1	4.671521376	4.575083476	4.57319416	4.578110585	4.577072651	4.573786562	4.671909376	4.67214456	4.579910968	4.57829376	4.578681588	4.675030326			4.573378088	4.577081647	4.581488511	4.579232538	4.578746679	4.680784654	4.571289567	4.67733381	4.672468385	4.676005019	4.574638121	4.582571142
RASEF	10.6318852	10.4584115	10.13519132	10.73971751	10.48772094	10.61632146	10.46220113	10.53874205	10.30232928	10.40505848	10.12008736	10.40764284			10.1895944	10.44796544	10.43014204	10.57300665	10.57366828	10.48178458	10.47438265	10.59847839	10.53614457	10.24251378	10.29226899	10.38858936
PARD3B	4.755210397	4.670696999	4.668531973	4.674165658	4.672976353	4.669210836	4.671909376	4.755901895	4.760433352	4.674375544	4.674819923	4.675030326			4.668742746	4.672986662	4.678036016	4.675451203	4.758953191	4.765488247	4.824064554	4.761659666	4.756261215	4.676005019	4.670186661	4.582571142
DST	4.575802893	4.575083476	4.57319416	4.578110585	4.577072651	4.573786562	4.576141497	4.576346741	4.579910968	4.57829376	4.578681588	4.578865217			4.573378088	4.756836295	4.581488511	4.579232538	4.674894505	4.583887599	4.571289567	4.67733381	4.576629343	4.579715888	4.574638121	4.582571142
ZNF441	4.962194691	4.897787478	4.894986292	4.902274621	5.078934438	4.959021888	5.021821388	5.022161454	5.028065533	5.081051734	4.903120894	5.082042457			4.668742746	4.832073274	4.838164539	4.835046512	4.903217362	4.974909316	4.666349345	4.837317508	4.831447986	4.8357146	4.82869499	4.908884374
NEGR1	4.671521376	4.754295638	4.668531973	4.674165658	4.756824857	4.669210836	4.830773541	4.755901895	4.760433352	4.758377372	4.674819923	4.759103891			4.752127066	4.672986662	4.678036016	4.675451203	4.758953191	4.680784654	4.749471072	4.761659666	4.672468385	4.760185353	4.82869499	4.679276406
FCRL3	6.335053583	6.021653618	6.289376571	6.449197386	6.320412428	6.063875526	6.240242599	6.025276168	6.291122331	6.121568693	5.682338706	6.326035119			5.637815193	5.708983287	5.967287516	5.773599022	5.44196831	5.631081863	6.357137438	5.590474215	5.613543597	5.587717059	5.845029945	6.134178607
DCAF4L2	4.671521376	4.575083476	4.668531973	4.75814449	4.672976353	4.669210836	4.576141497	4.67214456	4.579910968	4.674375544	4.674819923	4.578865217			4.668742746	4.672986662	4.678036016	4.579232538	4.674894505	4.583887599	4.666349345	4.67733381	4.576629343	4.579715888	4.670186661	4.679276406
STOX1	4.575802893	4.670696999	4.668531973	4.578110585	4.672976353	4.573786562	4.576141497	4.67214456	4.579910968	4.674375544	4.674819923	4.675030326			4.573378088	4.672986662	4.678036016	4.675451203	4.578746679	4.680784654	4.666349345	4.67733381	4.576629343	4.676005019	4.670186661	4.582571142
MIR1-1HG-AS1	5.129126928	5.313399888	5.221155733	5.183169958	5.181225517	5.267455142	5.226867339	5.13010935	5.136545634	5.133625759	5.184239499	5.02633355			5.174301141	5.228688517	5.139393123	5.232853712	5.403082047	5.193985542	5.262464373	5.325289854	5.398514037	5.233789464	5.269156525	5.284990894
ARL10	5.271483177	5.177497987	5.173956297	5.401709994	5.228671091	5.267455142	5.226867339	5.22726495	5.083855234	5.133625759	5.277230825	5.184583429			5.266638909	5.317503549	5.368549262	5.27833044	5.184361414	5.287615833	5.170384704	5.281608998	5.273133659	5.322910499	5.223954398	5.284990894
RNFT2	4.898853994	4.754295638	4.826698385	4.902274621	4.832060837	4.895864666	4.899355941	4.831057292	4.835984234	4.833748865	4.758870438	4.834538784			4.958379046	4.900749543	4.838164539	4.903937406	4.903217362	4.841479839	5.013779632	4.837317508	5.02262968	4.8357146	4.670186661	4.763814935
ANKFN1	4.830305409	4.754295638	4.826698385	4.75814449	4.832060837	4.827517541	4.899355941	4.831057292	4.760433352	4.758377372	4.758870438	4.834538784			4.895259013	4.900749543	4.838164539	4.903937406	5.026137212	4.910834624	5.013779632	4.906372237	5.02262968	5.027742458	4.82869499	4.908884374
KRT78	5.021260339	5.02006822	5.124413185	5.08073415	5.023364134	5.017918872	4.962727433	5.07767559	4.968656783	5.081051734	5.134326058	5.02633355			5.391494528	5.228688517	5.189495458	5.135320824	5.184361414	5.241861901	5.170384704	5.13828695	5.18039492	5.083517091	4.960361946	5.191521938
CCDC7	4.671521376	4.670696999	4.668531973	4.674165658	4.756824857	4.669210836	4.671909376	4.67214456	4.760433352	4.674375544	4.674819923	4.675030326			4.573378088	4.672986662	4.678036016	4.759570873	4.674894505	4.680784654	4.571289567	4.67733381	4.576629343	4.760185353	4.574638121	4.679276406
ZNF41	4.830305409	4.829310755	4.894986292	4.833495658	4.96419236	4.827517541	4.755640931	4.899660188	4.835984234	4.833748865	4.834284959	4.903393038			4.895259013	4.832073274	4.838164539	4.835046512	4.834374933	4.841479839	4.749471072	5.029663003	4.756261215	4.760185353	4.82869499	4.908884374
ZNF512	7.435234148	7.381253939	7.168866144	7.366592787	7.299203892	7.492843479	7.341206556	7.470492169	7.346634567	7.217871242	7.19948582	7.30602896			7.086914369	7.100646281	7.287863849	7.316669369	7.219574035	7.104181535	7.210930731	7.217669149	7.18177003	7.044802801	7.379532481	7.291953308
AMMECR1	5.178846269	5.177497987	4.958089577	5.025083574	5.023364134	5.017918872	5.077319638	5.022161454	4.968656783	4.966113228	5.026029397	5.02633355			4.895259013	5.023379039	5.030677827	5.135320824	4.966825629	4.974909316	5.013779632	5.08552719	5.078165685	4.968349985	5.019330183	4.908884374
FAM117B	6.773892651	6.090059614	5.992644947	6.226218423	6.282317254	6.192716302	6.024687777	6.093767116	6.291122331	6.185696055	5.984087218	6.208127795			6.381660369	6.411200023	6.389646199	6.535941651	6.078320164	6.115843193	6.18512141	5.990260354	6.072159043	6.210704523	5.996755356	6.111996043
ZNF583	4.830305409	4.670696999	4.894986292	4.75814449	4.756824857	4.752646498	4.830773541	4.831057292	4.760433352	4.833748865	4.758870438	4.759103891			4.826952719	4.756836295	4.762438758	4.675451203	4.903217362	4.680784654	4.892161979	4.837317508	5.02262968	4.8357146	4.897127216	4.763814935
OXER1	6.800469355	6.84958758	6.737706772	6.684547859	6.966449891	6.753367539	6.70629957	6.558194486	6.616562332	6.835344753	6.912279659	6.811228652			6.868614822	7.001245437	6.859507841	6.901931939	7.127990376	7.21894911	7.068482296	6.83142209	7.130594241	6.940299476	6.796369651	6.625502597
LUZP1	4.671521376	4.670696999	4.751893173	4.75814449	4.832060837	4.827517541	4.830773541	4.755901895	4.760433352	4.758377372	4.758870438	4.675030326			4.668742746	4.672986662	4.762438758	4.759570873	4.758953191	4.680784654	4.749471072	4.761659666	4.756261215	4.8357146	5.019330183	4.839660693
ZNF75D	5.820960356	5.762838754	5.572191568	5.799210667	5.738837013	5.759471391	5.676007664	5.645114208	5.831863608	5.51488844	5.71302594	5.743426299			5.605672533	5.475800624	5.55759732	5.619839068	5.515928306	5.527720859	5.462741452	5.556165515	5.511065785	5.553455349	5.575632073	5.752903276
LINC00052	4.575802893	4.575083476	4.668531973	4.75814449	4.672976353	4.669210836	4.755640931	4.576346741	4.579910968	4.674375544	4.674819923	4.578865217			4.668742746	4.756836295	4.678036016	4.675451203	4.674894505	4.765488247	4.749471072	4.67733381	4.672468385	4.676005019	4.670186661	4.582571142
BRWD1	5.735584141	5.762838754	5.391097239	5.549702221	5.438275719	5.539582822	5.357289055	5.579700943	5.588180918	5.584334578	5.618507166	5.651299987			5.538626124	5.475800624	5.65773698	5.619839068	5.68250086	5.563199189	5.498788233	5.623809594	5.511065785	5.553455349	5.432902416	5.56012582
CCDC89	4.575802893	4.575083476	4.57319416	4.674165658	4.577072651	4.573786562	4.576141497	4.576346741	4.676228538	4.57829376	4.674819923	4.578865217			4.573378088	4.672986662	4.678036016	4.675451203	4.578746679	4.765488247	4.571289567	4.580875628	4.576629343	4.579715888	4.670186661	4.582571142
ZNF572	4.575802893	4.754295638	4.668531973	4.674165658	4.672976353	4.669210836	4.671909376	4.576346741	4.579910968	4.674375544	4.674819923	4.675030326			4.668742746	4.672986662	4.678036016	4.579232538	4.674894505	4.680784654	4.749471072	4.67733381	4.900079099	4.579715888	4.574638121	4.582571142
RMDN2	4.898853994	5.02006822	4.826698385	4.75814449	4.900736207	4.827517541	4.830773541	4.831057292	4.760433352	4.833748865	4.758870438	4.675030326			4.895259013	4.900749543	4.762438758	4.835046512	4.758953191	4.841479839	4.824064554	4.837317508	4.96349495	4.9046537	4.82869499	4.839660693
ADAMTS18	4.830305409	4.897787478	4.826698385	4.902274621	4.832060837	4.827517541	4.755640931	4.755901895	4.760433352	4.833748865	4.903120894	4.834538784			4.752127066	4.964206513	4.907280352	4.759570873	4.903217362	4.841479839	4.666349345	4.837317508	4.96349495	4.8357146	4.75372934	4.763814935
PCDHAC1	5.356575472	5.313399888	5.637362702	5.549702221	5.512084125	5.787855355	5.436220996	5.510416531	5.482171416	5.51488844	5.515778871	5.442229714			5.729367494	5.547295551	5.65773698	5.586567617	5.515928306	5.563199189	5.632675277	5.520814175	5.737701541	5.364818036	5.354120326	5.450397638
HIPK4	6.023716927	6.021653618	5.992644947	6.098939301	5.904326788	6.041107813	6.220209352	6.071336163	6.011738524	5.982995295	6.144446914	5.984604144			5.894194301	6.243129684	6.063347956	5.985638029	6.078320164	6.159893423	6.122433197	6.038242996	6.180680559	6.081137981	5.948167464	5.866309455
FAM124A	5.076732377	5.075484552	5.072206902	5.08073415	5.023364134	5.017918872	5.021821388	5.022161454	5.028065533	5.081051734	5.081724113	5.02633355			5.124745594	5.181242373	5.086589317	5.026941938	5.184361414	5.241861901	5.170384704	5.236034308	5.273133659	5.027742458	5.127022547	5.088465276
NKAIN3	4.671521376	4.670696999	4.668531973	4.674165658	4.756824857	4.752646498	4.755640931	4.755901895	4.676228538	4.758377372	4.674819923	4.675030326			4.752127066	4.756836295	4.762438758	4.759570873	4.674894505	4.765488247	4.749471072	4.837317508	4.756261215	4.760185353	4.670186661	4.679276406
ITIH5	4.575802893	4.670696999	4.668531973	4.578110585	4.577072651	4.669210836	4.671909376	4.576346741	4.579910968	4.57829376	4.578681588	4.578865217			4.668742746	4.672986662	4.581488511	4.579232538	4.674894505	4.583887599	4.666349345	4.67733381	4.576629343	4.579715888	4.574638121	4.582571142
FANCB	4.671521376	4.670696999	4.751893173	4.75814449	4.756824857	4.669210836	4.755640931	4.831057292	4.676228538	4.674375544	4.758870438	4.759103891			4.668742746	4.672986662	4.678036016	4.759570873	4.674894505	4.765488247	4.749471072	4.761659666	4.672468385	4.760185353	4.75372934	4.839660693
POMK	5.226211339	5.270046201	5.221155733	5.361437534	5.274018851	5.310735353	5.315573	5.17986539	5.083855234	5.276456696	5.277230825	5.277597336			5.124745594	5.475800624	5.326546993	5.321918649	5.36277721	5.287615833	5.347058047	5.590474215	5.398514037	5.364818036	5.223954398	5.191521938
ZNF709	4.671521376	4.670696999	4.668531973	4.578110585	4.672976353	4.573786562	4.671909376	4.67214456	4.676228538	4.674375544	4.578681588	4.675030326			4.573378088	4.672986662	4.581488511	4.675451203	4.674894505	4.583887599	4.666349345	4.580875628	4.576629343	4.676005019	4.574638121	4.582571142
CCDC57	5.076732377	5.355059147	5.221155733	5.08073415	5.131420513	5.125483784	5.179480794	5.22726495	5.136545634	5.081051734	5.231786974	5.277597336			5.01724184	5.131436762	5.030677827	5.185271371	5.026137212	5.090745993	5.170384704	5.236034308	5.078165685	5.083517091	4.960361946	5.088465276
SMC1B	4.671521376	4.670696999	4.826698385	4.75814449	4.756824857	4.669210836	4.671909376	4.755901895	4.676228538	4.674375544	4.758870438	4.675030326			4.668742746	4.672986662	4.762438758	4.675451203	4.758953191	4.680784654	4.666349345	4.761659666	4.756261215	4.676005019	4.75372934	4.679276406
BRWD3	7.106525252	7.103853904	6.940631564	7.104452771	6.942785635	7.000603114	6.903184108	6.916107279	6.928889959	6.923095046	6.936585629	7.169872424			6.976269733	7.344813116	7.306679751	7.171242527	7.479840751	7.625567278	7.191441375	7.29498303	7.140979156	7.233038991	7.213896186	7.566759959
ASB16	5.435473681	5.471298024	5.605226979	5.478118123	5.475780357	5.700649218	5.736451746	5.545576107	5.279684298	5.36182334	5.441824765	5.58569397			5.637815193	5.581450289	5.55759732	5.683711093	5.479550448	5.491116316	5.72400799	5.556165515	5.953732007	5.444105384	5.31248499	5.370827271
MAGEE2	4.671521376	4.670696999	4.57319416	4.674165658	4.672976353	4.669210836	4.671909376	4.67214456	4.676228538	4.57829376	4.674819923	4.675030326			4.668742746	4.577081647	4.678036016	4.579232538	4.758953191	4.680784654	4.749471072	4.67733381	4.756261215	4.676005019	4.574638121	4.679276406
ERVV-1	4.671521376	4.670696999	4.668531973	4.674165658	4.672976353	4.752646498	4.755640931	4.576346741	4.676228538	4.758377372	4.674819923	4.675030326			4.752127066	4.756836295	4.678036016	4.759570873	4.674894505	4.680784654	4.749471072	4.67733381	4.756261215	4.676005019	4.75372934	4.679276406
GAL3ST3	5.178846269	5.270046201	5.173956297	5.183169958	5.181225517	5.125483784	5.272159431	5.07767559	5.136545634	5.081051734	5.184239499	5.02633355			5.309895962	5.274036814	5.189495458	5.135320824	5.184361414	5.143722048	5.170384704	5.188348072	5.227812396	5.233789464	4.960361946	5.191521938
FLJ30679	5.021260339	5.075484552	5.016936974	5.08073415	5.023364134	5.125483784	5.077319638	4.963050343	5.028065533	4.966113228	5.026029397	5.02633355			5.072526028	5.023379039	4.971137515	5.135320824	5.081836958	5.090745993	5.068901814	5.08552719	5.18039492	5.027742458	5.074712018	5.239315252
C2CD6	4.671521376	4.670696999	4.57319416	4.674165658	4.672976353	4.752646498	4.671909376	4.67214456	4.676228538	4.674375544	4.578681588	4.759103891			4.573378088	4.672986662	4.762438758	4.579232538	4.674894505	4.583887599	4.666349345	4.67733381	4.576629343	4.760185353	4.670186661	4.763814935
UTS2R	6.092171326	6.155050656	6.128114271	6.246287465	6.003678437	6.192716302	6.179209544	6.115818467	5.987547058	6.226777044	6.344133971	6.166375696			6.128662562	6.357482462	6.195308885	6.269518627	6.248238598	6.115843193	6.122433197	6.150962502	6.356048217	6.251210012	5.897652036	6.089430298
USH1G	5.675163238	5.819048866	5.84114824	5.854354113	5.851568653	5.700649218	5.821859812	5.849619762	5.746102027	5.771166046	5.682338706	5.743426299			6.016759318	5.979581203	5.750136231	5.830064383	5.934530519	5.814347965	5.913877953	5.777854965	5.928674311	5.986998193	5.845029945	5.660391662
SYN1	5.178846269	5.224817412	5.221155733	5.133294986	5.131420513	5.175066943	5.179480794	5.17986539	5.136545634	5.231035996	5.231786974	5.277597336			5.221512266	5.359270028	5.282831612	5.135320824	5.277360745	5.241861901	5.386982099	5.325289854	5.398514037	5.136193459	5.127022547	5.239315252
SLC23A3	4.755210397	4.754295638	4.751893173	4.75814449	4.672976353	4.752646498	4.899355941	4.755901895	4.760433352	4.758377372	4.674819923	4.834538784			4.668742746	4.756836295	4.762438758	4.675451203	4.758953191	4.765488247	4.666349345	4.761659666	4.672468385	4.676005019	4.670186661	4.763814935
CNOT6L	4.962194691	4.897787478	4.958089577	4.902274621	4.96419236	4.959021888	5.021821388	4.963050343	5.136545634	4.966113228	4.834284959	5.02633355			4.895259013	4.756836295	4.907280352	4.9675898	4.903217362	5.034649503	4.824064554	4.97017379	4.831447986	4.9046537	4.897127216	5.03247027
RHBDL3	4.962194691	4.829310755	4.894986292	4.965825102	4.900736207	4.895864666	4.899355941	4.755901895	4.904942788	4.966113228	4.903120894	4.903393038			4.895259013	5.023379039	5.086589317	4.903937406	4.903217362	4.974909316	4.824064554	4.97017379	5.02262968	4.9046537	4.897127216	4.839660693
ZNF718	5.076732377	5.576692866	5.605226979	5.230681282	5.078934438	5.125483784	5.226867339	5.07767559	5.186541852	5.550130578	5.277230825	5.184583429			4.752127066	4.964206513	5.030677827	5.135320824	4.966825629	5.287615833	5.120970451	4.97017379	5.18039492	5.322910499	5.176663242	5.41132636
DIP2B	4.671521376	4.670696999	4.751893173	4.75814449	4.672976353	4.752646498	4.755640931	4.67214456	4.835984234	4.758377372	4.758870438	4.675030326			4.668742746	4.672986662	4.838164539	4.675451203	4.758953191	4.974909316	4.749471072	4.67733381	4.672468385	4.676005019	4.670186661	4.908884374
SLC36A1	5.472919445	5.433885652	5.503169792	5.319615918	5.547274504	5.700649218	5.612363146	5.436673943	5.405592794	5.478530615	5.441824765	5.442229714			5.699615317	5.547295551	5.591930826	5.480644295	5.585412013	5.563199189	5.808958171	5.718565495	5.850378559	5.481732331	5.575632073	5.56012582
SNRNP48	6.458694646	6.276136775	6.308224034	6.266057868	6.202693618	6.233003382	6.158221642	6.240873023	6.455030777	6.164666009	6.642535802	6.485488146			6.085050321	6.357482462	6.276469871	6.249728378	6.362758453	6.614553302	6.010759339	6.423384827	6.261485058	6.488267111	6.367835843	6.578922309
ZNF560	4.671521376	4.575083476	4.57319416	4.674165658	4.577072651	4.573786562	4.671909376	4.576346741	4.676228538	4.57829376	4.578681588	4.675030326			4.573378088	4.672986662	4.581488511	4.579232538	4.578746679	4.680784654	4.571289567	4.67733381	4.672468385	4.676005019	4.574638121	4.582571142
RTTN	4.671521376	4.575083476	4.668531973	4.578110585	4.577072651	4.669210836	4.576141497	4.67214456	4.676228538	4.57829376	4.578681588	4.675030326			4.573378088	4.672986662	4.581488511	4.675451203	4.674894505	4.680784654	4.666349345	4.67733381	4.672468385	4.579715888	4.75372934	4.679276406
BTNL9	5.472919445	5.50751358	5.538195299	5.478118123	5.512084125	5.606661931	5.644609838	5.436673943	5.323310776	5.51488844	5.515778871	5.479817335			5.538626124	5.646919862	5.48572119	5.552325511	5.585412013	5.597629627	5.533732514	5.520814175	5.707839955	5.621007329	5.432902416	5.328767218
PUS10	4.755210397	4.829310755	4.826698385	4.833495658	4.756824857	4.752646498	4.830773541	4.831057292	4.760433352	4.833748865	4.758870438	4.903393038			4.826952719	4.832073274	4.762438758	4.759570873	4.903217362	4.841479839	4.824064554	4.837317508	4.900079099	4.8357146	4.75372934	4.763814935
PLCXD2	5.129126928	5.02006822	5.266271351	5.08073415	5.228671091	5.125483784	5.272159431	5.272569315	5.083855234	5.133625759	5.134326058	5.082042457			5.221512266	5.078950039	5.189495458	5.27833044	5.184361414	5.373596428	5.217463012	5.407672444	5.31657482	5.322910499	5.176663242	5.088465276
UMODL1-AS1	4.755210397	4.829310755	4.826698385	4.833495658	4.756824857	4.752646498	4.830773541	4.831057292	4.760433352	4.758377372	4.758870438	4.759103891			4.826952719	4.756836295	4.762438758	4.835046512	4.758953191	4.910834624	4.824064554	4.761659666	4.756261215	4.8357146	4.75372934	4.679276406
LMLN	4.962194691	4.829310755	4.826698385	4.833495658	4.96419236	4.895864666	4.899355941	4.831057292	4.835984234	4.902546106	4.834284959	4.903393038			4.895259013	4.964206513	4.838164539	4.903937406	4.834374933	4.841479839	4.95509176	4.906372237	4.96349495	4.9046537	4.75372934	4.839660693
RAD9B	4.671521376	4.670696999	4.751893173	4.75814449	4.756824857	4.752646498	4.671909376	4.755901895	4.676228538	4.674375544	4.674819923	4.759103891			4.668742746	4.672986662	4.678036016	4.675451203	4.758953191	4.583887599	4.95509176	4.67733381	4.672468385	4.760185353	4.82869499	4.763814935
ZNF555	5.271483177	5.127827214	5.221155733	5.230681282	5.023364134	5.22230402	5.077319638	5.17986539	5.279684298	5.231035996	5.277230825	5.363026837			5.124745594	5.023379039	5.086589317	4.903937406	5.026137212	5.034649503	5.013779632	5.13828695	5.078165685	5.083517091	5.269156525	5.141346844
NYAP1	4.830305409	4.829310755	4.894986292	4.75814449	4.900736207	4.895864666	4.830773541	4.755901895	4.835984234	4.758377372	4.834284959	4.834538784			4.826952719	4.832073274	4.838164539	4.835046512	4.834374933	4.910834624	4.824064554	4.906372237	4.96349495	4.9046537	4.82869499	4.839660693
RSKR	6.198840724	6.314165232	6.578663466	6.625632836	6.51260224	6.549640469	6.509529828	6.443475127	6.676194374	6.595815799	6.672002194	6.613042743			6.399274444	6.462863287	6.575324062	6.629423736	6.416551438	6.614553302	6.078909032	6.458153282	6.159683089	6.365826852	6.420740797	6.610150852
MRGPRX3	4.671521376	4.670696999	4.668531973	4.674165658	4.672976353	4.669210836	4.755640931	4.67214456	4.676228538	4.674375544	4.758870438	4.675030326			4.668742746	4.672986662	4.678036016	4.675451203	4.758953191	4.765488247	4.666349345	4.761659666	4.756261215	4.760185353	4.75372934	4.763814935
ABCA13	4.575802893	4.575083476	4.57319416	4.578110585	4.577072651	4.573786562	4.576141497	4.576346741	4.579910968	4.57829376	4.578681588	4.675030326			4.573378088	4.577081647	4.581488511	4.579232538	4.578746679	4.583887599	4.571289567	4.580875628	4.576629343	4.579715888	4.574638121	4.582571142
ADGRG7	4.671521376	4.670696999	4.751893173	4.75814449	4.672976353	4.752646498	4.755640931	4.67214456	4.676228538	4.674375544	4.674819923	4.675030326			4.668742746	4.672986662	4.678036016	4.759570873	4.758953191	4.765488247	4.749471072	4.761659666	4.756261215	4.760185353	5.019330183	4.679276406
CSF3R	7.106525252	7.23497511	7.785502356	7.824791083	7.414780703	7.578190086	7.367851368	7.230086345	7.766279988	7.857299497	8.256844952	7.93311263			8.7846564	8.945655948	8.858184909	8.399645458	9.092621877	9.537125945	8.610959221	8.807325024	8.917040327	9.281593867	8.426875749	9.27998527
C17orf77	4.575802893	4.575083476	4.57319416	4.674165658	4.577072651	4.573786562	4.576141497	4.576346741	4.579910968	4.57829376	4.578681588	4.675030326			4.573378088	4.577081647	4.678036016	4.579232538	4.578746679	4.583887599	4.571289567	4.580875628	4.576629343	4.579715888	4.574638121	4.582571142
DUSP5P1	4.671521376	4.670696999	4.668531973	4.578110585	4.672976353	4.669210836	4.576141497	4.67214456	4.579910968	4.57829376	4.674819923	4.578865217			4.668742746	4.577081647	4.678036016	4.579232538	4.674894505	4.680784654	4.666349345	4.67733381	4.576629343	4.579715888	4.670186661	4.582571142
DGKH	4.755210397	4.754295638	4.751893173	4.833495658	4.756824857	4.827517541	4.755640931	4.831057292	4.760433352	4.833748865	4.758870438	4.834538784			4.826952719	4.756836295	4.678036016	4.675451203	4.834374933	4.841479839	4.824064554	4.761659666	4.756261215	4.9046537	4.82869499	4.908884374
TMEM182	4.898853994	4.829310755	4.751893173	4.75814449	4.832060837	4.752646498	4.671909376	4.831057292	4.835984234	4.758377372	4.758870438	4.759103891			4.826952719	4.832073274	4.838164539	4.835046512	4.758953191	4.765488247	4.749471072	4.761659666	4.756261215	4.760185353	4.75372934	4.763814935
C16orf46	5.396730309	5.177497987	5.221155733	5.230681282	5.181225517	5.606661931	5.315573	5.22726495	5.186541852	5.231035996	5.277230825	5.277597336			5.266638909	5.317503549	5.282831612	5.363800328	5.403082047	5.373596428	5.305602893	5.188348072	5.437297567	5.322910499	5.31248499	5.191521938
LSM14B	6.297534729	6.236991504	6.211201207	6.142749844	6.139663558	6.417984389	6.024687777	5.927892212	6.126339959	5.933278335	5.908733676	6.05578349			6.085050321	6.223079328	6.256639854	5.935873456	6.306723988	6.283851118	5.862515434	6.172385825	6.116653492	5.831346305	6.628806774	6.279802187
CASP8	5.076732377	4.961062731	5.016936974	5.025083574	5.078934438	5.175066943	5.129738602	5.07767559	5.083855234	5.081051734	4.966723249	4.967012072			5.124745594	5.078950039	5.189495458	5.185271371	5.081836958	5.090745993	5.170384704	5.029663003	5.437297567	4.968349985	5.019330183	4.97283973
PLB1	4.575802893	4.670696999	4.668531973	4.674165658	4.577072651	4.669210836	4.671909376	4.67214456	4.579910968	4.57829376	4.578681588	4.675030326			4.668742746	4.672986662	4.581488511	4.675451203	4.674894505	4.583887599	4.571289567	4.67733381	4.576629343	4.579715888	4.574638121	4.679276406
C20orf197	5.178846269	5.471298024	5.072206902	5.133294986	5.438275719	5.310735353	5.272159431	5.315994494	5.279684298	5.319991913	5.479403892	5.551466769			5.124745594	5.181242373	5.326546993	5.27833044	5.320921533	5.331466187	5.170384704	5.188348072	5.130619815	5.405172167	5.354120326	5.488156325
SLC5A3	5.226211339	5.224817412	5.072206902	5.230681282	5.131420513	5.352324918	5.077319638	5.17986539	5.136545634	5.276456696	5.184239499	5.321164816			5.174301141	5.078950039	5.368549262	5.135320824	5.277360745	5.241861901	5.170384704	5.236034308	5.18039492	5.481732331	5.470294105	5.284990894
KIF19	5.271483177	5.433885652	4.958089577	5.08073415	5.131420513	5.073234723	5.129738602	5.022161454	5.083855234	5.183513073	5.026029397	5.02633355			4.958379046	5.023379039	4.971137515	4.9675898	5.026137212	5.034649503	4.95509176	5.188348072	4.96349495	4.968349985	4.82869499	5.03247027
SLFNL1	4.755210397	4.670696999	4.751893173	4.75814449	4.672976353	4.827517541	4.671909376	4.899660188	4.760433352	4.758377372	4.758870438	4.759103891			4.668742746	4.756836295	4.678036016	4.675451203	4.578746679	4.680784654	4.666349345	4.67733381	4.672468385	4.676005019	4.670186661	4.763814935
GPR82	4.830305409	4.897787478	4.894986292	4.965825102	5.023364134	5.017918872	5.021821388	4.963050343	4.968656783	4.833748865	4.903120894	4.967012072			4.895259013	4.900749543	4.907280352	4.903937406	4.903217362	4.910834624	5.068901814	4.97017379	5.02262968	5.136193459	5.019330183	4.908884374
RIBC1	4.830305409	4.897787478	4.751893173	4.833495658	4.832060837	4.895864666	4.830773541	4.831057292	4.760433352	4.833748865	4.903120894	4.759103891			4.895259013	5.023379039	4.838164539	4.9675898	4.903217362	4.841479839	4.95509176	4.906372237	5.02262968	4.8357146	4.82869499	4.839660693
OXGR1	4.575802893	4.670696999	4.668531973	4.674165658	4.672976353	4.669210836	4.671909376	4.755901895	4.579910968	4.674375544	4.674819923	4.578865217			4.668742746	4.672986662	4.762438758	4.579232538	4.674894505	4.680784654	4.666349345	4.761659666	4.756261215	4.579715888	4.75372934	4.679276406
CDC14C	4.575802893	4.575083476	4.57319416	4.674165658	4.577072651	4.573786562	4.576141497	4.576346741	4.579910968	4.57829376	4.578681588	4.675030326			4.573378088	4.577081647	4.581488511	4.579232538	4.674894505	4.583887599	4.571289567	4.580875628	4.576629343	4.579715888	4.574638121	4.582571142
SULT1C4	4.575802893	4.670696999	4.668531973	4.674165658	4.672976353	4.573786562	4.671909376	4.67214456	4.676228538	4.674375544	4.674819923	4.675030326			4.752127066	4.832073274	4.762438758	4.675451203	4.674894505	4.680784654	4.749471072	4.761659666	4.672468385	4.760185353	4.670186661	4.679276406
TEAD1	4.575802893	4.670696999	4.57319416	4.674165658	4.577072651	4.669210836	4.671909376	4.576346741	4.676228538	4.57829376	4.674819923	4.578865217			4.668742746	4.672986662	4.581488511	4.675451203	4.674894505	4.680784654	4.666349345	4.67733381	4.756261215	4.579715888	4.670186661	4.582571142
POU5F2	5.021260339	4.961062731	4.894986292	4.902274621	4.900736207	5.017918872	4.899355941	4.899660188	4.904942788	4.833748865	4.966723249	4.834538784			4.895259013	4.900749543	4.838164539	4.9675898	4.966825629	4.841479839	5.013779632	4.906372237	5.02262968	4.968349985	4.82869499	4.908884374
RXFP2	4.671521376	4.575083476	4.668531973	4.674165658	4.672976353	4.573786562	4.671909376	4.576346741	4.676228538	4.674375544	4.674819923	4.675030326			4.668742746	4.672986662	4.678036016	4.675451203	4.758953191	4.680784654	4.666349345	4.67733381	4.672468385	4.676005019	4.670186661	4.763814935
BEND7	4.755210397	4.670696999	4.826698385	4.75814449	4.756824857	4.752646498	4.755640931	4.755901895	4.676228538	4.674375544	4.834284959	4.834538784			4.826952719	4.756836295	4.762438758	4.835046512	4.758953191	4.765488247	4.749471072	4.761659666	5.02262968	4.8357146	4.670186661	4.763814935
SLC18A2	4.830305409	4.961062731	4.958089577	4.833495658	5.078934438	5.606661931	4.830773541	5.315994494	4.904942788	4.833748865	4.903120894	4.903393038			4.958379046	4.964206513	4.907280352	5.363800328	4.966825629	4.910834624	5.068901814	5.13828695	5.02262968	5.186176547	4.82869499	5.088465276
SSMEM1	4.671521376	4.670696999	4.668531973	4.674165658	4.577072651	4.573786562	4.576141497	4.576346741	4.579910968	4.57829376	4.578681588	4.675030326			4.668742746	4.672986662	4.678036016	4.675451203	4.674894505	4.583887599	4.666349345	4.580875628	4.672468385	4.676005019	4.574638121	4.679276406
MAB21L3	4.575802893	4.670696999	4.57319416	4.578110585	4.577072651	4.573786562	4.671909376	4.576346741	4.579910968	4.57829376	4.578681588	4.578865217			4.573378088	4.672986662	4.581488511	4.579232538	4.674894505	4.680784654	4.666349345	4.580875628	4.672468385	4.676005019	4.574638121	4.679276406
BASP1-AS1	4.671521376	4.670696999	4.668531973	4.75814449	4.672976353	4.752646498	4.671909376	4.755901895	4.760433352	4.758377372	4.674819923	4.834538784			4.752127066	4.756836295	4.678036016	4.759570873	4.758953191	4.680784654	4.749471072	4.761659666	4.756261215	4.8357146	4.82869499	4.763814935
MIER3	4.671521376	4.670696999	4.751893173	4.674165658	4.577072651	4.752646498	4.755640931	4.755901895	4.676228538	4.674375544	4.758870438	4.675030326			4.668742746	4.756836295	4.678036016	4.759570873	4.834374933	4.765488247	4.824064554	4.761659666	4.756261215	4.676005019	4.897127216	4.679276406
SDE2	6.092171326	6.196656428	5.84114824	5.90717009	5.904326788	5.638819991	5.706606546	5.612859804	5.885918494	5.68137247	5.908733676	5.743426299			6.696755323	6.651903102	6.637036268	6.345869864	6.836942459	6.855034018	6.056588734	6.423384827	6.374186059	6.73268069	6.110766989	6.259953151
UROC1	4.755210397	4.754295638	4.751893173	4.75814449	4.672976353	4.752646498	4.755640931	4.755901895	4.835984234	4.758377372	4.758870438	4.675030326			4.826952719	4.756836295	4.762438758	4.759570873	4.758953191	4.765488247	4.749471072	4.761659666	4.831447986	4.760185353	4.75372934	4.763814935
PCDH15	4.575802893	4.670696999	4.57319416	4.674165658	4.577072651	4.573786562	4.576141497	4.67214456	4.579910968	4.57829376	4.674819923	4.675030326			4.573378088	4.577081647	4.581488511	4.579232538	4.674894505	4.583887599	4.666349345	4.67733381	4.672468385	4.676005019	4.75372934	4.679276406
TNRC6A	5.021260339	5.224817412	5.016936974	5.183169958	5.078934438	5.125483784	5.077319638	4.899660188	5.136545634	5.025386996	5.184239499	5.082042457			5.124745594	5.023379039	5.139393123	5.026941938	5.081836958	5.193985542	4.892161979	5.188348072	5.02262968	5.083517091	5.074712018	5.088465276
KCNA6	4.898853994	4.961062731	5.016936974	4.965825102	4.96419236	4.895864666	5.021821388	4.899660188	4.968656783	5.025386996	4.903120894	4.967012072			5.072526028	4.964206513	5.030677827	5.08267923	5.026137212	4.974909316	5.170384704	4.97017379	5.227812396	5.083517091	5.019330183	4.839660693
ARID2	6.38943572	6.473113213	6.483453856	6.640599687	6.637078109	6.400591259	6.372631066	6.664029053	6.690707552	6.483620352	6.565981188	6.518511003			6.308802746	6.576284209	6.442854701	6.83865567	6.597335929	6.614553302	6.283411645	6.694004308	5.928674311	6.419663613	6.293893915	6.670555514
AMER3	4.755210397	4.754295638	4.826698385	4.75814449	4.756824857	4.827517541	4.755640931	4.755901895	4.760433352	4.674375544	4.758870438	4.675030326			4.826952719	4.832073274	4.762438758	4.759570873	4.758953191	4.841479839	4.892161979	4.97017379	4.831447986	4.8357146	4.670186661	4.763814935
OTUD7A	4.830305409	4.897787478	4.958089577	4.833495658	4.96419236	4.827517541	5.021821388	4.831057292	4.904942788	4.902546106	4.834284959	4.903393038			4.958379046	4.964206513	5.139393123	5.08267923	4.966825629	4.974909316	4.892161979	4.97017379	5.130619815	4.8357146	4.82869499	4.908884374
ERVW-1	4.755210397	4.670696999	4.668531973	4.674165658	4.756824857	4.752646498	4.755640931	4.67214456	4.676228538	4.758377372	4.758870438	4.834538784			4.668742746	4.832073274	4.762438758	4.759570873	4.834374933	4.680784654	4.749471072	4.761659666	4.756261215	4.676005019	4.82869499	4.679276406
FBXL18	5.874778949	5.819048866	5.968617037	5.770691209	5.851568653	5.920801938	5.901774776	5.822404948	5.685400618	5.68137247	5.934350579	5.856378445			5.944643349	6.050634208	6.016213107	5.884080349	5.828775524	5.814347965	6.164555775	5.806460621	6.026086224	5.937209136	5.845029945	5.893120274
LINC01600	4.755210397	4.754295638	4.751893173	4.833495658	4.672976353	4.752646498	4.755640931	4.831057292	4.676228538	4.833748865	4.758870438	4.759103891			4.752127066	4.900749543	4.678036016	4.835046512	4.758953191	4.910834624	4.892161979	4.761659666	4.831447986	4.760185353	4.82869499	4.763814935
PNPLA1	4.671521376	4.754295638	4.668531973	4.674165658	4.756824857	4.827517541	4.671909376	4.67214456	4.676228538	4.674375544	4.674819923	4.675030326			4.752127066	4.672986662	4.678036016	4.675451203	4.674894505	4.583887599	4.666349345	4.580875628	4.756261215	4.8357146	4.75372934	4.839660693
DEPDC4	4.671521376	4.670696999	4.751893173	4.674165658	4.756824857	4.669210836	4.671909376	4.67214456	4.676228538	4.674375544	4.674819923	4.759103891			4.752127066	4.672986662	4.762438758	4.759570873	4.674894505	4.765488247	4.666349345	4.580875628	4.756261215	4.676005019	4.670186661	4.679276406
COX6B2	4.830305409	5.02006822	4.894986292	5.025083574	4.900736207	4.895864666	5.021821388	4.899660188	4.904942788	4.966113228	4.903120894	4.834538784			5.01724184	4.964206513	4.971137515	4.9675898	5.026137212	5.090745993	5.068901814	4.97017379	5.078165685	5.027742458	4.75372934	4.839660693
NIBAN3	6.441709327	6.090059614	6.190915493	6.564078167	6.050608221	6.272102913	6.677800773	6.373285337	6.329312219	6.379487424	5.882587162	6.208127795			6.251432797	6.117989662	6.425350144	5.884080349	5.959642808	6.415266089	5.752982825	5.940412629	5.707839955	6.103642086	5.897652036	5.995026023
EPHA10	4.671521376	4.670696999	4.751893173	4.674165658	4.672976353	4.752646498	4.755640931	4.67214456	4.676228538	4.758377372	4.674819923	4.675030326			4.668742746	4.672986662	4.678036016	4.675451203	4.758953191	4.765488247	4.824064554	4.580875628	4.756261215	4.579715888	4.670186661	4.839660693
WDR64	4.962194691	5.02006822	5.072206902	4.965825102	5.131420513	4.959021888	5.179480794	5.07767559	4.904942788	5.025386996	5.081724113	4.967012072			5.072526028	5.023379039	5.086589317	4.9675898	5.081836958	5.143722048	5.217463012	5.188348072	5.227812396	5.136193459	5.074712018	5.088465276
BTBD9	4.830305409	4.829310755	4.826698385	4.833495658	4.900736207	4.827517541	4.962727433	4.831057292	4.835984234	4.902546106	4.834284959	4.903393038			4.826952719	4.964206513	4.907280352	4.835046512	4.903217362	4.974909316	4.824064554	4.837317508	4.900079099	4.9046537	4.82869499	4.763814935
HEATR9	5.129126928	5.355059147	5.173956297	5.276091045	5.317485076	5.310735353	5.226867339	5.315994494	5.482171416	5.319991913	5.32078794	5.442229714			5.072526028	5.228688517	5.086589317	5.321918649	5.231913008	5.241861901	5.013779632	5.188348072	5.227812396	5.027742458	5.541576858	5.328767218
PARP15	6.000068735	5.99802248	5.605226979	5.680916057	5.708960548	5.920801938	5.612363146	5.766116955	5.5539113	6.030854631	5.682338706	6.101150552			5.572629907	5.708983287	5.836045187	5.857363544	5.551189623	5.695294815	5.498788233	5.590474215	5.474781659	5.715637972	6.088751925	5.56012582
ARHGAP42	4.575802893	4.670696999	4.57319416	4.674165658	4.577072651	4.573786562	4.671909376	4.67214456	4.676228538	4.57829376	4.674819923	4.675030326			4.573378088	4.672986662	4.678036016	4.579232538	4.578746679	4.680784654	4.666349345	4.67733381	4.672468385	4.579715888	4.670186661	4.582571142
LINC01101	5.076732377	5.224817412	5.173956297	5.183169958	5.078934438	5.017918872	5.179480794	5.022161454	5.028065533	5.081051734	5.026029397	5.082042457			5.072526028	5.228688517	5.030677827	5.135320824	5.184361414	5.090745993	5.217463012	5.325289854	5.130619815	5.083517091	5.019330183	4.97283973
MFSD2A	5.129126928	5.224817412	5.266271351	5.230681282	5.359251073	5.22230402	5.357289055	5.13010935	5.186541852	5.231035996	5.184239499	5.184583429			5.266638909	5.359270028	5.326546993	5.27833044	5.231913008	5.45329702	5.068901814	5.281608998	5.474781659	5.279295022	5.223954398	5.284990894
ATM	6.297534729	6.133743518	6.211201207	6.185144329	6.262854066	6.272102913	6.220209352	6.408836053	6.366444208	6.185696055	6.00824889	6.344712606			6.039925675	6.202720906	6.063347956	6.269518627	6.078320164	6.223321412	6.056588734	6.274582408	6.026086224	6.103642086	6.174673647	6.111996043
CALHM4	4.575802893	4.670696999	4.668531973	4.674165658	4.672976353	4.669210836	4.755640931	4.576346741	4.579910968	4.57829376	4.578681588	4.675030326			4.573378088	4.672986662	4.678036016	4.579232538	4.674894505	4.583887599	4.571289567	4.67733381	4.672468385	4.676005019	4.670186661	4.582571142
NPHP3	4.830305409	4.897787478	4.894986292	5.025083574	4.832060837	4.895864666	5.021821388	4.831057292	4.904942788	4.833748865	4.903120894	4.903393038			4.826952719	4.900749543	4.907280352	5.026941938	4.966825629	4.910834624	4.749471072	4.761659666	4.831447986	4.8357146	4.960361946	4.97283973
ATG9B	4.755210397	4.754295638	4.751893173	4.75814449	4.672976353	4.669210836	4.671909376	4.67214456	4.676228538	4.758377372	4.674819923	4.759103891			4.668742746	4.832073274	4.762438758	4.675451203	4.758953191	4.765488247	4.749471072	4.67733381	4.672468385	4.676005019	4.670186661	4.763814935
CXorf58	4.575802893	4.670696999	4.668531973	4.674165658	4.672976353	4.669210836	4.755640931	4.755901895	4.676228538	4.674375544	4.758870438	4.675030326			4.826952719	4.756836295	4.678036016	4.675451203	4.674894505	4.680784654	4.749471072	4.67733381	4.756261215	4.760185353	4.670186661	4.679276406
TFAP2B	4.671521376	4.575083476	4.57319416	4.578110585	4.672976353	4.669210836	4.576141497	4.576346741	4.676228538	4.57829376	4.578681588	4.578865217			4.573378088	4.577081647	4.581488511	4.675451203	4.674894505	4.680784654	4.666349345	4.580875628	4.576629343	4.579715888	4.670186661	4.679276406
CCDC13	4.830305409	4.897787478	5.016936974	4.902274621	4.900736207	4.895864666	4.962727433	4.899660188	4.904942788	4.902546106	5.026029397	4.834538784			5.072526028	5.131436762	4.838164539	4.903937406	4.966825629	4.910834624	4.892161979	4.906372237	4.96349495	4.8357146	4.82869499	4.839660693
MRGPRX1	4.671521376	4.754295638	4.751893173	4.833495658	4.756824857	4.752646498	4.830773541	4.831057292	4.760433352	4.758377372	4.834284959	4.759103891			4.826952719	4.832073274	4.762438758	4.759570873	4.834374933	4.841479839	4.824064554	4.837317508	4.756261215	4.8357146	4.82869499	4.763814935
HFE	4.671521376	4.575083476	4.668531973	4.674165658	4.672976353	4.573786562	4.576141497	4.67214456	4.676228538	4.674375544	4.674819923	4.578865217			4.668742746	4.672986662	4.678036016	4.675451203	4.674894505	4.680784654	4.666349345	4.580875628	4.576629343	4.579715888	4.670186661	4.679276406
RLN3	4.898853994	4.754295638	4.826698385	4.833495658	4.756824857	4.827517541	4.830773541	4.755901895	4.835984234	4.758377372	4.834284959	4.834538784			4.895259013	4.900749543	4.838164539	4.903937406	4.758953191	4.841479839	4.824064554	4.837317508	4.900079099	4.9046537	4.82869499	4.839660693
CSMD1	4.671521376	4.754295638	4.668531973	4.674165658	4.756824857	4.669210836	4.755640931	4.755901895	4.579910968	4.758377372	4.758870438	4.675030326			4.826952719	4.756836295	4.762438758	4.759570873	4.674894505	4.680784654	4.749471072	4.67733381	4.756261215	4.760185353	4.670186661	4.763814935
MACF1	5.271483177	5.50751358	5.016936974	5.401709994	5.512084125	5.352324918	5.357289055	5.545576107	5.518600723	5.478530615	5.515778871	5.363026837			5.266638909	5.274036814	5.408993433	5.321918649	5.320921533	5.414162219	5.217463012	5.281608998	5.02262968	5.279295022	5.019330183	5.524702941
ADAMTS20	4.575802893	4.670696999	4.668531973	4.674165658	4.672976353	4.669210836	4.671909376	4.67214456	4.676228538	4.57829376	4.674819923	4.675030326			4.668742746	4.672986662	4.581488511	4.675451203	4.674894505	4.583887599	4.666349345	4.67733381	4.756261215	4.579715888	4.75372934	4.679276406
SALL3	4.671521376	4.754295638	4.751893173	4.674165658	4.672976353	4.669210836	4.755640931	4.755901895	4.579910968	4.674375544	4.758870438	4.675030326			4.752127066	4.672986662	4.678036016	4.675451203	4.758953191	4.680784654	4.749471072	4.761659666	4.756261215	4.676005019	4.670186661	4.582571142
AGBL4	4.755210397	4.897787478	4.826698385	4.833495658	4.832060837	4.895864666	4.830773541	4.831057292	4.760433352	4.833748865	4.758870438	4.675030326			4.826952719	4.900749543	4.762438758	4.835046512	4.834374933	4.841479839	4.892161979	4.761659666	4.96349495	4.8357146	4.82869499	4.839660693
LCAL1	4.755210397	4.754295638	4.751893173	4.75814449	4.756824857	4.827517541	4.671909376	4.67214456	4.760433352	4.674375544	4.674819923	4.675030326			4.752127066	4.756836295	4.678036016	4.835046512	4.758953191	4.765488247	4.749471072	4.67733381	4.900079099	4.676005019	4.75372934	4.839660693
SLC17A8	4.575802893	4.575083476	4.57319416	4.578110585	4.577072651	4.573786562	4.576141497	4.576346741	4.579910968	4.57829376	4.578681588	4.578865217			4.573378088	4.672986662	4.581488511	4.579232538	4.578746679	4.583887599	4.571289567	4.580875628	4.576629343	4.579715888	4.574638121	4.582571142
LINC02873	4.671521376	4.670696999	4.826698385	4.75814449	4.756824857	4.827517541	4.755640931	4.755901895	4.760433352	4.674375544	4.674819923	4.675030326			4.752127066	4.900749543	4.678036016	4.759570873	4.834374933	4.841479839	4.824064554	4.761659666	4.900079099	4.8357146	4.75372934	4.763814935
SATB2-AS1	4.671521376	4.670696999	4.57319416	4.674165658	4.672976353	4.669210836	4.671909376	4.576346741	4.676228538	4.674375544	4.758870438	4.675030326			4.752127066	4.672986662	4.678036016	4.675451203	4.758953191	4.680784654	4.749471072	4.67733381	4.756261215	4.676005019	4.670186661	4.679276406
RBFOX1	5.076732377	5.075484552	5.124413185	5.08073415	5.078934438	5.017918872	5.129738602	5.07767559	5.083855234	5.025386996	4.966723249	5.082042457			5.072526028	5.228688517	4.971137515	5.135320824	5.184361414	5.090745993	5.425505584	5.08552719	5.227812396	5.027742458	5.074712018	5.03247027
SLFN13	5.178846269	5.50751358	5.124413185	5.133294986	5.317485076	5.267455142	5.077319638	5.315994494	5.279684298	5.319991913	5.184239499	5.516200433			4.958379046	4.964206513	5.086589317	5.08267923	5.026137212	4.974909316	4.95509176	5.281608998	4.96349495	5.136193459	4.960361946	5.328767218
C12orf40	4.671521376	4.575083476	4.668531973	4.674165658	4.577072651	4.573786562	4.671909376	4.576346741	4.579910968	4.57829376	4.674819923	4.578865217			4.668742746	4.577081647	4.678036016	4.579232538	4.674894505	4.583887599	4.666349345	4.580875628	4.672468385	4.760185353	4.574638121	4.582571142
CFAP57	4.898853994	4.961062731	4.894986292	4.902274621	4.900736207	4.895864666	4.899355941	5.022161454	4.904942788	5.025386996	4.966723249	4.903393038			4.958379046	5.023379039	4.971137515	4.903937406	4.966825629	4.974909316	5.068901814	4.97017379	5.02262968	5.027742458	4.897127216	4.908884374
C5orf64	4.575802893	4.575083476	4.57319416	4.578110585	4.672976353	4.669210836	4.671909376	4.755901895	4.676228538	4.57829376	4.674819923	4.578865217			4.752127066	4.672986662	4.678036016	4.675451203	4.674894505	4.680784654	4.666349345	4.761659666	4.672468385	4.676005019	4.75372934	4.582571142
ADAMTS15	4.898853994	4.897787478	4.958089577	4.833495658	4.900736207	4.959021888	4.830773541	4.899660188	4.904942788	4.966113228	4.834284959	4.903393038			4.958379046	5.131436762	4.907280352	4.903937406	4.834374933	5.090745993	4.824064554	4.837317508	4.96349495	4.8357146	4.960361946	4.763814935
LY86-AS1	4.755210397	4.670696999	4.751893173	4.578110585	4.756824857	4.669210836	4.755640931	4.67214456	4.579910968	4.57829376	4.674819923	4.675030326			4.668742746	4.756836295	4.678036016	4.759570873	4.674894505	4.680784654	4.749471072	4.67733381	4.756261215	4.676005019	4.75372934	4.679276406
EDARADD	4.755210397	4.754295638	4.894986292	4.75814449	4.832060837	4.895864666	4.830773541	4.755901895	4.676228538	4.833748865	4.758870438	4.759103891			4.826952719	4.832073274	4.762438758	4.835046512	4.903217362	4.910834624	4.749471072	4.761659666	4.96349495	4.9046537	4.82869499	4.839660693
CCDC171	4.575802893	4.575083476	4.57319416	4.578110585	4.577072651	4.669210836	4.576141497	4.576346741	4.579910968	4.57829376	4.578681588	4.578865217			4.573378088	4.577081647	4.678036016	4.675451203	4.578746679	4.583887599	4.571289567	4.580875628	4.576629343	4.676005019	4.670186661	4.582571142
CYP4Z2P	4.755210397	4.754295638	4.57319416	4.674165658	4.672976353	4.669210836	4.671909376	4.755901895	4.676228538	4.674375544	4.674819923	4.675030326			4.752127066	4.672986662	4.678036016	4.759570873	4.674894505	4.765488247	4.666349345	4.67733381	4.756261215	4.676005019	4.670186661	4.679276406
C18orf15	4.830305409	4.961062731	4.958089577	4.902274621	4.832060837	5.017918872	4.899355941	4.831057292	4.904942788	4.833748865	4.903120894	4.903393038			4.895259013	4.900749543	4.907280352	4.9675898	4.903217362	4.974909316	4.95509176	4.906372237	4.900079099	4.8357146	4.82869499	4.839660693
MUC19	4.671521376	4.670696999	4.668531973	4.674165658	4.672976353	4.669210836	4.671909376	4.67214456	4.579910968	4.674375544	4.674819923	4.675030326			4.668742746	4.672986662	4.678036016	4.675451203	4.758953191	4.680784654	4.749471072	4.761659666	4.831447986	4.676005019	4.75372934	4.679276406
KLHDC7A	4.898853994	4.829310755	4.894986292	4.833495658	4.900736207	5.017918872	4.899355941	4.899660188	4.835984234	4.833748865	4.903120894	4.834538784			4.958379046	4.900749543	4.907280352	4.903937406	4.966825629	4.841479839	4.892161979	4.837317508	4.831447986	4.9046537	4.897127216	4.839660693
C11orf72	5.764705875	6.044859365	6.016231193	5.957867742	6.027356679	6.086250589	6.024687777	6.001615097	5.775356658	5.958378963	5.934350579	5.934858193			6.016759318	6.027382459	6.086287647	5.960998245	6.207768632	6.070256365	6.143663529	6.214215272	6.261485058	6.103642086	5.79009334	5.810901893
AQP4-AS1	4.575802893	4.575083476	4.57319416	4.578110585	4.577072651	4.669210836	4.576141497	4.576346741	4.579910968	4.57829376	4.578681588	4.578865217			4.573378088	4.577081647	4.581488511	4.579232538	4.578746679	4.583887599	4.666349345	4.67733381	4.576629343	4.676005019	4.574638121	4.582571142
CNTNAP4	4.575802893	4.575083476	4.57319416	4.578110585	4.577072651	4.573786562	4.576141497	4.576346741	4.579910968	4.57829376	4.578681588	4.578865217			4.573378088	4.577081647	4.581488511	4.579232538	4.578746679	4.583887599	4.571289567	4.580875628	4.576629343	4.676005019	4.574638121	4.582571142
FER1L6-AS1	4.755210397	4.670696999	4.751893173	4.674165658	4.756824857	4.752646498	4.755640931	4.755901895	4.676228538	4.674375544	4.674819923	4.675030326			4.752127066	4.756836295	4.678036016	4.675451203	4.758953191	4.765488247	4.749471072	4.67733381	4.756261215	4.676005019	4.670186661	4.679276406
C1orf127	5.793153127	5.673368755	5.786297964	5.711583456	5.767999907	5.759471391	5.765584463	5.579700943	5.685400618	5.741963639	5.855885919	5.651299987			5.841642826	6.027382459	5.750136231	5.744366285	5.772339972	5.756266266	5.781288159	5.718565495	5.823155468	5.774851309	5.732598711	5.56012582
AGBL1	4.671521376	4.575083476	4.751893173	4.674165658	4.672976353	4.669210836	4.671909376	4.67214456	4.579910968	4.674375544	4.674819923	4.759103891			4.668742746	4.756836295	4.581488511	4.675451203	4.674894505	4.680784654	4.571289567	4.67733381	4.756261215	4.676005019	4.670186661	4.582571142
LINC02880	4.575802893	4.575083476	4.57319416	4.75814449	4.672976353	4.669210836	4.671909376	4.576346741	4.579910968	4.674375544	4.758870438	4.675030326			4.668742746	4.672986662	4.678036016	4.675451203	4.674894505	4.680784654	4.666349345	4.580875628	4.672468385	4.676005019	4.82869499	4.679276406
LINC00304	5.129126928	5.02006822	5.124413185	5.183169958	5.228671091	5.073234723	5.021821388	5.07767559	5.186541852	5.231035996	5.277230825	5.134657618			5.221512266	5.438295569	5.189495458	5.27833044	4.966825629	5.143722048	5.170384704	5.188348072	5.130619815	5.027742458	4.960361946	5.141346844
TERB1	4.671521376	4.829310755	4.668531973	4.674165658	4.672976353	4.752646498	4.755640931	4.576346741	4.676228538	4.758377372	4.674819923	4.578865217			4.752127066	4.756836295	4.762438758	4.759570873	4.758953191	4.765488247	4.824064554	4.761659666	4.831447986	4.760185353	4.82869499	4.679276406
MYO1H	4.671521376	4.670696999	4.668531973	4.578110585	4.672976353	4.669210836	4.576141497	4.576346741	4.579910968	4.674375544	4.674819923	4.675030326			4.752127066	4.672986662	4.678036016	4.675451203	4.674894505	4.680784654	4.666349345	4.67733381	4.672468385	4.676005019	4.670186661	4.582571142
ASB14	4.830305409	4.754295638	4.826698385	4.833495658	4.900736207	4.827517541	4.830773541	4.831057292	4.760433352	4.758377372	4.834284959	4.759103891			4.895259013	4.900749543	4.762438758	4.835046512	4.834374933	4.841479839	4.892161979	4.837317508	4.756261215	4.8357146	4.897127216	4.763814935
RPTN	4.575802893	4.575083476	4.57319416	4.578110585	4.577072651	4.573786562	4.576141497	4.576346741	4.579910968	4.674375544	4.578681588	4.578865217			4.573378088	4.672986662	4.678036016	4.579232538	4.674894505	4.583887599	4.666349345	4.580875628	4.576629343	4.676005019	4.670186661	4.582571142
LINC00269	4.962194691	5.02006822	5.016936974	4.965825102	5.023364134	5.017918872	5.021821388	5.022161454	4.968656783	5.025386996	5.081724113	4.967012072			5.01724184	5.078950039	5.030677827	5.026941938	5.026137212	5.143722048	4.95509176	5.13828695	5.02262968	5.027742458	4.82869499	5.141346844
VSTM4	4.962194691	5.075484552	5.124413185	4.965825102	5.181225517	5.073234723	5.179480794	5.022161454	5.028065533	5.133625759	5.081724113	5.082042457			5.124745594	5.181242373	5.139393123	5.135320824	5.026137212	5.090745993	5.068901814	5.188348072	5.398514037	5.136193459	5.074712018	4.97283973
CCDC150	4.755210397	4.897787478	4.894986292	4.833495658	4.900736207	4.827517541	4.899355941	4.831057292	4.835984234	4.758377372	4.758870438	4.834538784			4.895259013	4.900749543	4.762438758	4.835046512	4.758953191	4.765488247	5.013779632	4.837317508	4.900079099	4.9046537	4.75372934	4.839660693
STPG4	4.962194691	4.961062731	5.072206902	5.025083574	4.900736207	5.017918872	4.830773541	4.963050343	4.904942788	4.902546106	5.026029397	4.834538784			4.958379046	5.078950039	5.030677827	4.9675898	5.081836958	5.034649503	5.013779632	5.029663003	5.078165685	5.027742458	4.897127216	4.763814935
FAM9B	4.575802893	4.670696999	4.668531973	4.674165658	4.672976353	4.669210836	4.755640931	4.67214456	4.676228538	4.758377372	4.674819923	4.578865217			4.752127066	4.832073274	4.678036016	4.835046512	4.578746679	4.680784654	4.824064554	4.761659666	4.831447986	4.760185353	4.82869499	4.679276406
FLJ40288	5.643777661	5.791263447	5.757932629	5.649447106	5.95497008	5.759471391	5.794042325	5.676519456	5.588180918	5.933278335	5.855885919	5.713489757			5.729367494	5.738860055	5.750136231	5.985638029	5.959642808	5.527720859	6.100852647	5.888531134	6.049327574	5.937209136	5.672257627	5.722843002
CES5A	4.830305409	4.897787478	4.894986292	4.902274621	4.900736207	4.959021888	5.021821388	4.899660188	4.968656783	4.902546106	4.966723249	4.834538784			4.958379046	4.900749543	5.030677827	4.903937406	4.903217362	4.974909316	4.95509176	5.029663003	4.900079099	4.9046537	4.897127216	4.908884374
CFAP47	5.076732377	5.075484552	5.124413185	5.025083574	5.078934438	5.22230402	5.021821388	5.022161454	4.968656783	4.966113228	5.134326058	5.082042457			5.124745594	5.078950039	5.030677827	5.135320824	5.184361414	5.143722048	5.262464373	5.236034308	5.437297567	5.083517091	5.074712018	5.03247027
DNAH17	4.755210397	4.754295638	4.668531973	4.674165658	4.577072651	4.752646498	4.755640931	4.67214456	4.760433352	4.674375544	4.674819923	4.675030326			4.752127066	4.756836295	4.678036016	4.675451203	4.674894505	4.765488247	4.666349345	4.761659666	4.672468385	4.676005019	4.574638121	4.679276406
SLC35G3	4.830305409	4.754295638	4.826698385	4.75814449	4.756824857	4.669210836	4.830773541	4.755901895	4.760433352	4.758377372	4.758870438	4.759103891			4.752127066	4.832073274	4.762438758	4.759570873	4.834374933	4.765488247	4.824064554	4.837317508	4.831447986	4.8357146	4.82869499	4.839660693
LINC01931	4.575802893	4.670696999	4.668531973	4.674165658	4.672976353	4.573786562	4.671909376	4.576346741	4.579910968	4.57829376	4.674819923	4.675030326			4.573378088	4.672986662	4.581488511	4.579232538	4.674894505	4.680784654	4.666349345	4.67733381	4.672468385	4.760185353	4.670186661	4.679276406
LOC100288966	4.575802893	4.575083476	4.57319416	4.578110585	4.577072651	4.573786562	4.576141497	4.576346741	4.579910968	4.57829376	4.578681588	4.578865217			4.573378088	4.577081647	4.581488511	4.579232538	4.578746679	4.583887599	4.571289567	4.580875628	4.576629343	4.579715888	4.670186661	4.582571142
KIRREL3-AS3	4.755210397	4.829310755	4.826698385	4.902274621	4.832060837	4.752646498	4.830773541	4.755901895	4.835984234	4.833748865	4.758870438	4.759103891			4.895259013	4.900749543	4.838164539	4.835046512	4.834374933	4.841479839	4.824064554	4.906372237	4.96349495	4.760185353	4.82869499	4.763814935
TMEM145	4.755210397	4.754295638	4.826698385	4.75814449	4.832060837	4.827517541	4.830773541	4.755901895	4.835984234	4.758377372	4.758870438	4.759103891			4.826952719	4.756836295	4.762438758	4.835046512	4.758953191	4.841479839	4.749471072	4.837317508	4.831447986	4.760185353	4.75372934	4.839660693
C15orf32	4.671521376	4.670696999	4.668531973	4.578110585	4.672976353	4.669210836	4.671909376	4.755901895	4.760433352	4.674375544	4.674819923	4.675030326			4.668742746	4.672986662	4.762438758	4.675451203	4.674894505	4.765488247	4.749471072	4.67733381	4.672468385	4.676005019	4.670186661	4.679276406
TSGA10IP	5.129126928	5.177497987	5.124413185	5.133294986	5.181225517	5.22230402	5.179480794	5.13010935	5.136545634	5.183513073	5.231786974	5.134657618			5.124745594	5.359270028	5.086589317	5.232853712	5.134443588	5.090745993	5.120970451	5.13828695	5.078165685	5.083517091	5.127022547	5.03247027
LINC00477	4.671521376	4.670696999	4.668531973	4.674165658	4.672976353	4.573786562	4.671909376	4.755901895	4.676228538	4.674375544	4.758870438	4.675030326			4.752127066	4.672986662	4.581488511	4.675451203	4.834374933	4.680784654	4.666349345	4.67733381	4.756261215	4.676005019	4.75372934	4.679276406
CCDC140	4.575802893	4.670696999	4.668531973	4.578110585	4.577072651	4.573786562	4.576141497	4.67214456	4.579910968	4.57829376	4.578681588	4.675030326			4.668742746	4.756836295	4.581488511	4.579232538	4.674894505	4.583887599	4.571289567	4.580875628	4.576629343	4.579715888	4.574638121	4.582571142
C17orf78	4.671521376	4.754295638	4.668531973	4.578110585	4.577072651	4.752646498	4.755640931	4.67214456	4.579910968	4.674375544	4.674819923	4.675030326			4.573378088	4.672986662	4.678036016	4.759570873	4.674894505	4.583887599	4.749471072	4.761659666	4.672468385	4.676005019	4.670186661	4.679276406
TEKT5	5.129126928	5.177497987	5.173956297	5.08073415	5.131420513	5.073234723	5.226867339	5.272569315	5.323310776	5.183513073	5.184239499	5.082042457			5.266638909	5.274036814	5.139393123	5.08267923	5.277360745	5.331466187	5.170384704	5.188348072	5.130619815	5.233789464	5.127022547	5.370827271
KSR2	4.671521376	4.670696999	4.751893173	4.674165658	4.672976353	4.669210836	4.755640931	4.67214456	4.676228538	4.758377372	4.758870438	4.675030326			4.668742746	4.756836295	4.678036016	4.759570873	4.578746679	4.583887599	4.666349345	4.761659666	4.756261215	4.760185353	4.670186661	4.763814935
PAX1	4.755210397	4.670696999	4.668531973	4.674165658	4.672976353	4.669210836	4.671909376	4.67214456	4.676228538	4.758377372	4.674819923	4.675030326			4.668742746	4.672986662	4.678036016	4.675451203	4.758953191	4.765488247	4.666349345	4.67733381	4.672468385	4.676005019	4.670186661	4.679276406
TDH	4.898853994	4.961062731	4.894986292	4.833495658	4.900736207	4.895864666	4.899355941	4.963050343	4.835984234	4.902546106	4.834284959	4.834538784			4.895259013	4.964206513	4.907280352	4.903937406	4.903217362	5.034649503	4.95509176	4.97017379	5.078165685	4.9046537	4.82869499	4.839660693
LINC00615	4.671521376	4.575083476	4.668531973	4.578110585	4.577072651	4.573786562	4.671909376	4.576346741	4.579910968	4.674375544	4.578681588	4.675030326			4.573378088	4.672986662	4.581488511	4.675451203	4.578746679	4.680784654	4.571289567	4.67733381	4.672468385	4.676005019	4.670186661	4.679276406
SERPINA9	5.314877587	5.471298024	5.467038197	5.361437534	5.399470662	5.468374146	5.473682467	5.315994494	5.136545634	5.550130578	5.362640132	5.277597336			5.467453006	5.61463786	5.326546993	5.443039689	5.651008972	5.45329702	5.663897072	5.484342289	5.613543597	5.364818036	5.470294105	5.239315252
FBXL21P	4.830305409	4.961062731	4.894986292	4.833495658	4.832060837	5.017918872	4.962727433	4.899660188	4.760433352	4.902546106	4.834284959	4.903393038			4.895259013	4.900749543	4.838164539	4.903937406	4.834374933	4.910834624	4.95509176	5.029663003	4.96349495	4.968349985	5.394215697	4.763814935
MRGPRX4	4.755210397	4.754295638	4.751893173	4.75814449	4.756824857	4.752646498	4.830773541	4.755901895	4.835984234	4.758377372	4.834284959	4.759103891			4.752127066	4.832073274	4.838164539	4.759570873	4.758953191	4.765488247	4.824064554	4.761659666	4.756261215	4.760185353	4.670186661	4.763814935
A2ML1	4.755210397	4.754295638	4.826698385	4.902274621	4.756824857	4.895864666	4.755640931	4.755901895	4.760433352	4.833748865	4.834284959	4.834538784			4.826952719	4.832073274	4.762438758	4.759570873	4.903217362	4.841479839	4.892161979	4.761659666	4.96349495	4.8357146	4.897127216	4.763814935
CPO	4.671521376	4.754295638	4.751893173	4.833495658	4.756824857	4.895864666	4.830773541	4.755901895	4.760433352	4.758377372	4.834284959	4.759103891			4.752127066	4.832073274	4.838164539	4.759570873	4.758953191	4.765488247	4.749471072	4.837317508	4.831447986	4.760185353	4.897127216	4.763814935
GPR6	5.129126928	5.313399888	5.124413185	5.183169958	5.181225517	5.310735353	5.179480794	5.22726495	5.083855234	5.183513073	5.277230825	5.184583429			5.174301141	5.274036814	5.326546993	5.232853712	5.026137212	5.143722048	5.262464373	5.236034308	5.31657482	5.186176547	5.176663242	4.97283973
MDS2	5.129126928	5.02006822	5.266271351	5.319615918	5.228671091	5.310735353	4.962727433	5.22726495	5.518600723	4.966113228	5.081724113	5.02633355			5.124745594	5.023379039	5.139393123	5.27833044	4.966825629	5.143722048	5.013779632	5.08552719	5.078165685	5.136193459	4.897127216	5.141346844
CNOT9	6.424508367	6.600291055	6.416065864	6.431963689	6.462833971	6.31008772	6.240242599	6.426266437	6.231706225	6.305311315	6.306520992	6.416932181			6.107038552	6.262881846	6.236509738	6.269518627	6.325663512	6.223321412	6.164555775	6.214215272	6.180680559	6.271008797	6.312765424	6.563037018
GJD3	5.226211339	5.177497987	5.266271351	5.230681282	5.228671091	5.22230402	5.226867339	5.17986539	5.279684298	5.276456696	5.231786974	5.277597336			5.35146356	5.228688517	5.139393123	5.232853712	5.277360745	5.193985542	5.305602893	5.325289854	5.358317046	5.233789464	5.074712018	5.239315252
HOXC12	4.755210397	4.754295638	4.751893173	4.75814449	4.672976353	4.669210836	4.755640931	4.755901895	4.760433352	4.758377372	4.834284959	4.675030326			4.752127066	4.756836295	4.838164539	4.759570873	4.758953191	4.765488247	4.666349345	4.761659666	4.672468385	4.760185353	4.75372934	4.679276406
VNN3	4.671521376	4.670696999	4.668531973	4.75814449	4.672976353	4.669210836	4.671909376	4.755901895	4.676228538	4.758377372	4.758870438	4.759103891			4.895259013	4.964206513	5.237220415	4.903937406	5.743122928	5.373596428	4.749471072	5.08552719	5.078165685	5.803420853	4.75372934	5.56012582
COPS9	4.830305409	4.754295638	4.826698385	4.833495658	4.756824857	4.752646498	4.755640931	4.831057292	4.835984234	4.758377372	4.758870438	4.759103891			4.826952719	4.900749543	4.838164539	4.759570873	4.758953191	4.841479839	4.824064554	4.761659666	4.756261215	4.760185353	4.82869499	4.679276406
FERD3L	5.076732377	5.127827214	5.124413185	5.025083574	5.078934438	4.959021888	5.021821388	5.022161454	4.968656783	4.966113228	5.081724113	4.903393038			5.01724184	4.964206513	5.086589317	5.08267923	5.184361414	4.974909316	5.170384704	5.13828695	5.358317046	5.027742458	4.897127216	5.03247027
LINC00314	4.575802893	4.670696999	4.668531973	4.578110585	4.577072651	4.669210836	4.576141497	4.576346741	4.464759051	4.57829376	4.674819923	4.578865217			4.668742746	4.577081647	4.581488511	4.675451203	4.674894505	4.583887599	4.666349345	4.67733381	4.672468385	4.579715888	4.574638121	4.582571142
NLRP14	5.129126928	5.127827214	5.072206902	5.08073415	5.023364134	5.22230402	5.077319638	5.22726495	5.136545634	5.133625759	5.026029397	5.02633355			5.01724184	5.131436762	5.086589317	5.321918649	5.184361414	5.241861901	5.262464373	5.08552719	5.31657482	5.186176547	5.269156525	5.088465276
DGKB	4.575802893	4.575083476	4.57319416	4.674165658	4.577072651	4.669210836	4.671909376	4.576346741	4.579910968	4.674375544	4.578681588	4.578865217			4.668742746	4.672986662	4.581488511	4.579232538	4.578746679	4.583887599	4.666349345	4.580875628	4.672468385	4.676005019	4.670186661	4.582571142
NLRP13	4.898853994	5.127827214	5.016936974	5.025083574	5.023364134	4.895864666	5.226867339	4.899660188	4.904942788	5.025386996	5.081724113	4.834538784			5.309895962	5.023379039	5.030677827	5.135320824	5.081836958	5.090745993	4.824064554	5.13828695	5.18039492	5.027742458	4.82869499	5.03247027
NLRP8	5.129126928	5.177497987	5.173956297	5.276091045	5.181225517	5.175066943	5.179480794	5.13010935	4.968656783	5.183513073	5.231786974	5.134657618			5.174301141	5.438295569	5.139393123	5.232853712	5.184361414	5.241861901	5.120970451	5.236034308	5.18039492	5.233789464	5.127022547	5.088465276
NLRP9	4.755210397	4.829310755	4.894986292	4.902274621	4.900736207	4.895864666	5.021821388	4.963050343	4.835984234	4.966113228	4.966723249	4.834538784			4.895259013	5.023379039	4.971137515	4.9675898	4.903217362	4.910834624	4.824064554	4.837317508	4.900079099	4.9046537	5.074712018	4.908884374
TAF5	6.813569326	6.659709007	6.842865093	6.860335577	6.60700303	6.739772658	6.853347376	6.67850454	6.814896442	6.873630315	6.756804291	6.888196871			6.532501779	6.666540246	6.591014316	6.67388144	6.362758453	6.551304293	6.427028752	6.525128544	6.31902089	6.787564216	6.454894241	6.64068473
TAS1R2	4.755210397	4.754295638	4.826698385	4.75814449	4.756824857	4.669210836	4.755640931	4.755901895	4.676228538	4.674375544	4.834284959	4.675030326			4.826952719	4.832073274	4.838164539	4.903937406	4.834374933	4.841479839	4.666349345	4.761659666	4.831447986	4.760185353	4.82869499	4.679276406
ITGB1	8.277699888	8.605337394	8.029869814	8.028067758	7.529547591	8.292251079	8.187955215	8.143515502	8.237971421	8.231223089	8.513378785	8.358706272			7.904704262	8.012645373	8.030731947	8.145234114	7.85913415	7.848056712	7.999893491	8.367158972	8.180048687	7.971969362	8.25878709	7.98361181
PCSK6	4.671521376	4.670696999	4.668531973	4.674165658	4.672976353	4.669210836	4.671909376	4.67214456	4.579910968	4.674375544	4.674819923	4.675030326			4.668742746	4.577081647	4.678036016	4.759570873	4.674894505	4.680784654	4.571289567	4.580875628	4.672468385	4.579715888	4.670186661	4.679276406
ZNF341	4.830305409	4.754295638	4.751893173	4.902274621	4.832060837	4.895864666	4.830773541	4.831057292	4.835984234	4.758377372	4.758870438	4.759103891			4.826952719	4.832073274	4.838164539	4.835046512	4.758953191	4.910834624	4.824064554	4.906372237	4.831447986	4.9046537	4.82869499	4.763814935
JPH1	4.671521376	4.575083476	4.668531973	4.674165658	4.672976353	4.752646498	4.671909376	4.67214456	4.676228538	4.674375544	4.578681588	4.675030326			4.668742746	4.672986662	4.762438758	4.675451203	4.758953191	4.765488247	4.666349345	4.67733381	4.672468385	4.676005019	4.670186661	4.679276406
NLRP10	4.671521376	4.754295638	4.668531973	4.833495658	4.756824857	4.669210836	4.671909376	4.755901895	4.676228538	4.758377372	4.674819923	4.675030326			4.826952719	4.672986662	4.762438758	4.675451203	4.758953191	4.680784654	4.749471072	4.761659666	4.756261215	4.760185353	4.670186661	4.679276406
RANGAP1	6.335053583	6.090059614	6.211201207	6.121027989	6.182016899	6.108247525	6.136893184	6.115818467	6.251807871	6.143294316	6.144446914	6.078664874			6.149935245	6.095922739	6.195308885	5.985638029	6.00843371	6.023010776	6.100852647	5.990260354	5.928674311	6.103642086	6.293893915	6.374854555
MBNL2	5.021260339	4.829310755	4.894986292	4.833495658	4.96419236	4.959021888	5.021821388	5.022161454	4.968656783	5.081051734	5.026029397	4.834538784			4.958379046	4.832073274	4.907280352	4.835046512	4.903217362	4.974909316	4.95509176	5.08552719	4.96349495	5.027742458	4.960361946	4.839660693
KRT73	5.076732377	4.897787478	4.894986292	4.965825102	5.023364134	5.073234723	4.755640931	4.963050343	5.186541852	4.758377372	4.834284959	4.759103891			4.826952719	4.832073274	4.971137515	4.903937406	4.758953191	4.765488247	4.892161979	4.837317508	4.672468385	4.9046537	4.75372934	4.763814935
COX1	12.36814537	12.29653744	12.71518646	12.77211596	12.67886338	12.60794845	12.71133242	12.74687885	12.68796226	12.66004661	12.78651286	12.75828552			12.58482707	12.65759268	12.35818191	12.62206277	12.67084734	12.62270523	12.48026338	12.40125401	12.59754926	12.6535309	12.65832177	12.66798245
KRT74	4.962194691	4.897787478	4.894986292	4.965825102	4.900736207	5.017918872	4.899355941	4.831057292	5.028065533	4.833748865	4.903120894	4.903393038			5.01724184	4.900749543	4.907280352	4.9675898	5.026137212	4.910834624	5.068901814	4.837317508	4.900079099	4.9046537	4.897127216	4.97283973
SLC29A2	5.178846269	5.313399888	5.173956297	5.133294986	5.274018851	5.310735353	5.226867339	5.17986539	5.186541852	5.183513073	5.134326058	5.134657618			5.35146356	5.274036814	5.139393123	5.08267923	5.320921533	5.143722048	5.425505584	5.325289854	5.437297567	5.136193459	5.223954398	5.141346844
LMX1A	4.671521376	4.670696999	4.751893173	4.674165658	4.577072651	4.669210836	4.671909376	4.67214456	4.676228538	4.57829376	4.674819923	4.578865217			4.668742746	4.672986662	4.678036016	4.759570873	4.674894505	4.765488247	4.666349345	4.67733381	4.672468385	4.760185353	4.670186661	4.679276406
CCDC125	5.396730309	5.54261949	5.605226979	5.514467843	5.581428876	5.468374146	5.436220996	5.510416531	5.62147878	5.617569446	5.32078794	5.651299987			5.729367494	5.929925829	5.991983501	5.744366285	6.032151466	6.283851118	5.498788233	6.061581638	5.737701541	6.384012296	5.672257627	6.219343415
GPR101	5.076732377	5.02006822	5.072206902	5.08073415	5.078934438	5.125483784	5.021821388	4.963050343	4.968656783	5.081051734	5.081724113	5.02633355			5.221512266	5.131436762	5.086589317	4.9675898	5.184361414	5.143722048	5.386982099	5.188348072	5.02262968	5.027742458	5.223954398	5.088465276
ILDR1	4.830305409	4.897787478	4.894986292	4.902274621	4.832060837	4.827517541	4.962727433	4.899660188	4.904942788	4.833748865	4.903120894	4.759103891			4.958379046	4.964206513	4.762438758	4.835046512	4.903217362	5.034649503	5.120970451	4.906372237	4.96349495	4.8357146	4.960361946	4.839660693
RBM26	4.755210397	4.897787478	4.751893173	4.833495658	4.756824857	4.827517541	4.671909376	4.755901895	4.760433352	4.758377372	4.834284959	4.759103891			4.668742746	4.672986662	4.762438758	4.835046512	4.758953191	4.765488247	4.749471072	4.761659666	4.756261215	4.760185353	4.897127216	4.763814935
VN1R2	4.755210397	4.670696999	4.668531973	4.674165658	4.756824857	4.752646498	4.671909376	4.67214456	4.676228538	4.674375544	4.674819923	4.675030326			4.752127066	4.832073274	4.678036016	4.759570873	4.758953191	4.680784654	4.749471072	4.761659666	4.756261215	4.760185353	4.75372934	4.763814935
VN1R5	4.671521376	4.670696999	4.668531973	4.75814449	4.672976353	4.669210836	4.671909376	4.67214456	4.676228538	4.758377372	4.674819923	4.675030326			4.752127066	4.756836295	4.762438758	4.675451203	4.758953191	4.680784654	4.824064554	4.67733381	4.831447986	4.760185353	4.75372934	4.679276406
ND2	12.25463548	12.31637892	12.42230671	12.53620797	12.49057737	12.33410872	12.46299263	12.41541556	12.29720406	12.46035763	12.517443	12.35449641			12.39055526	12.57189943	12.30414451	12.40904391	12.43934773	12.3841435	12.54956194	12.22670057	12.33975353	12.27529572	12.44168109	12.43633802
TAAR8	4.830305409	4.829310755	4.894986292	4.75814449	4.832060837	4.827517541	4.899355941	4.831057292	4.676228538	4.833748865	4.758870438	4.834538784			4.895259013	4.964206513	4.838164539	4.835046512	4.903217362	4.910834624	4.892161979	4.906372237	4.900079099	4.9046537	4.82869499	4.908884374
TAS2R39	4.830305409	4.829310755	4.751893173	4.75814449	4.832060837	4.959021888	4.755640931	4.755901895	4.676228538	4.833748865	4.834284959	4.834538784			4.895259013	4.832073274	4.907280352	4.835046512	4.903217362	4.910834624	4.892161979	4.837317508	4.96349495	4.8357146	4.82869499	4.679276406
TAS2R38	4.830305409	4.897787478	4.958089577	4.75814449	4.900736207	4.959021888	4.899355941	4.899660188	4.760433352	4.902546106	4.966723249	4.903393038			5.072526028	5.023379039	4.971137515	4.9675898	5.026137212	4.974909316	5.068901814	5.029663003	5.18039492	4.9046537	4.960361946	4.97283973
TAS2R40	4.575802893	4.670696999	4.668531973	4.578110585	4.672976353	4.752646498	4.671909376	4.576346741	4.676228538	4.57829376	4.674819923	4.578865217			4.668742746	4.672986662	4.678036016	4.675451203	4.758953191	4.680784654	4.666349345	4.67733381	4.756261215	4.676005019	4.670186661	4.582571142
TAS2R41	4.830305409	4.754295638	4.826698385	4.75814449	4.756824857	4.895864666	4.830773541	4.755901895	4.760433352	4.758377372	4.834284959	4.759103891			4.826952719	4.900749543	4.762438758	4.759570873	4.834374933	4.910834624	4.824064554	4.837317508	4.831447986	4.760185353	4.897127216	4.679276406
TMEM171	4.830305409	4.829310755	4.751893173	4.75814449	4.900736207	4.827517541	4.830773541	4.899660188	4.760433352	4.833748865	4.834284959	4.903393038			4.958379046	4.900749543	4.907280352	4.835046512	4.903217362	4.841479839	5.013779632	4.837317508	4.900079099	4.760185353	4.897127216	4.763814935
VN1R4	4.671521376	4.754295638	4.751893173	4.674165658	4.756824857	4.669210836	4.671909376	4.576346741	4.760433352	4.674375544	4.674819923	4.578865217			4.752127066	4.756836295	4.838164539	4.759570873	4.834374933	4.680784654	4.749471072	4.761659666	4.831447986	4.760185353	4.670186661	4.679276406
TAS2R50	4.671521376	4.754295638	4.668531973	4.674165658	4.672976353	4.669210836	4.671909376	4.755901895	4.676228538	4.758377372	4.758870438	4.675030326			4.668742746	4.756836295	4.762438758	4.579232538	4.758953191	4.765488247	4.666349345	4.67733381	4.672468385	4.760185353	4.75372934	4.679276406
CD8B	4.962194691	4.897787478	4.894986292	4.833495658	4.832060837	4.959021888	4.962727433	4.899660188	4.835984234	4.902546106	4.903120894	4.903393038			4.895259013	4.832073274	4.907280352	4.835046512	4.834374933	4.910834624	4.892161979	4.906372237	4.900079099	4.9046537	4.75372934	4.839660693
MACROD2	4.755210397	4.754295638	4.751893173	4.75814449	4.756824857	4.895864666	4.830773541	4.831057292	4.760433352	4.758377372	4.834284959	4.834538784			4.826952719	4.832073274	4.762438758	4.903937406	4.903217362	4.765488247	5.068901814	4.837317508	5.02262968	4.760185353	5.541576858	5.03247027
DDAH1	4.755210397	4.754295638	4.826698385	4.833495658	4.756824857	4.752646498	4.830773541	4.831057292	4.835984234	4.758377372	4.758870438	4.834538784			4.895259013	4.900749543	4.907280352	4.835046512	4.758953191	4.841479839	4.824064554	4.761659666	4.756261215	4.9046537	4.75372934	4.763814935
PIANP	4.898853994	4.897787478	4.958089577	4.965825102	4.900736207	4.895864666	4.830773541	5.022161454	4.835984234	5.025386996	4.966723249	4.967012072			4.958379046	5.023379039	4.971137515	4.903937406	5.081836958	5.090745993	5.068901814	5.029663003	5.02262968	4.9046537	4.82869499	4.839660693
ATP6	12.28494298	11.95194499	12.23666598	12.33315392	12.1982032	12.15884263	12.26529915	12.17722265	12.20940394	12.29411354	12.25458222	12.27227065			12.20552705	12.28448324	12.14627622	12.0331069	12.31741485	12.17010687	12.15443522	11.82898133	12.20260346	11.98408209	12.19524595	12.09686539
H1-6	4.962194691	5.02006822	5.072206902	4.965825102	4.96419236	5.073234723	5.021821388	4.963050343	4.904942788	4.902546106	4.966723249	4.967012072			5.01724184	5.023379039	5.086589317	4.9675898	5.026137212	5.193985542	4.892161979	5.029663003	4.96349495	5.027742458	4.897127216	4.97283973
COX2	12.68528561	12.47988186	12.68082506	12.69921216	12.73674582	12.61206521	12.73519405	12.68495618	12.57324722	12.65172947	12.70880184	12.7392816			12.67120879	12.71374021	12.56581453	12.50578635	12.60217819	12.60313741	12.59152911	12.4165854	12.58562652	12.6514938	12.68185973	12.62834826
CYGB	5.271483177	5.355059147	5.429713635	5.361437534	5.274018851	5.22230402	5.226867339	5.397904141	5.234167106	5.36182334	5.32078794	5.277597336			5.309895962	5.438295569	5.282831612	5.404129882	5.515928306	5.331466187	5.347058047	5.407672444	5.31657482	5.518153022	5.223954398	5.239315252
EFNA2	4.755210397	4.754295638	4.751893173	4.902274621	4.756824857	4.752646498	4.755640931	4.67214456	4.676228538	4.758377372	4.758870438	4.759103891			4.826952719	4.756836295	4.762438758	4.759570873	4.758953191	4.841479839	4.749471072	4.906372237	4.672468385	4.676005019	4.75372934	4.679276406
IFNE	4.671521376	4.575083476	4.668531973	4.674165658	4.672976353	4.752646498	4.755640931	4.755901895	4.676228538	4.674375544	4.674819923	4.759103891			4.668742746	4.832073274	4.678036016	4.675451203	4.834374933	4.765488247	4.824064554	4.67733381	4.831447986	4.760185353	4.960361946	4.679276406
ND6	7.722642716	8.102020152	8.094156563	8.449952608	8.424633839	8.36360039	8.733663455	8.45487006	7.995884871	8.302050526	8.344560325	8.389435246			8.166456937	8.292345676	8.04193563	8.659611455	8.477362536	8.531445476	8.473831783	8.449127582	7.941772653	8.440030569	7.566417682	7.849189259
SREK1IP1	7.418371518	7.372540999	7.198646317	7.197345027	7.261657191	7.286660178	7.22931079	7.230086345	7.281897008	7.331392316	7.296028903	7.149303482			7.209131058	6.954700304	7.084481512	7.240974228	7.13846515	6.747048091	6.86113669	7.082233411	6.976525246	7.022243873	7.174295499	7.077460246
THRSP	4.830305409	4.754295638	4.826698385	4.833495658	4.832060837	4.827517541	4.899355941	4.831057292	4.760433352	4.833748865	4.834284959	4.903393038			4.752127066	4.756836295	4.838164539	4.835046512	4.966825629	4.841479839	4.892161979	4.837317508	4.831447986	4.9046537	4.75372934	4.763814935
DIPK2B	4.898853994	4.961062731	5.016936974	5.025083574	5.023364134	4.895864666	4.962727433	4.963050343	4.968656783	4.833748865	5.081724113	5.02633355			5.072526028	4.900749543	5.086589317	5.026941938	5.231913008	5.090745993	5.217463012	5.08552719	5.02262968	4.8357146	4.960361946	4.908884374
FBXL19-AS1	4.898853994	4.897787478	5.016936974	5.025083574	4.96419236	4.959021888	5.021821388	4.899660188	4.835984234	4.966113228	4.903120894	4.903393038			4.958379046	5.078950039	5.030677827	4.9675898	4.966825629	5.034649503	5.068901814	4.906372237	5.02262968	4.9046537	4.960361946	4.908884374
POLE4	6.973525047	6.874710966	7.009714195	6.970205543	6.942785635	6.844974143	6.865974611	6.802382175	6.928889959	6.873630315	7.007067625	6.824355971			7.021579886	6.930833989	6.922306968	6.785877873	6.770672662	6.535024496	6.784560978	6.736679763	6.511139777	6.746606772	7.289914766	6.913823578
PDZK1IP1	5.675163238	6.74429184	5.728895689	6.185144329	5.708960548	5.468374146	6.240242599	5.902337387	5.588180918	5.68137247	6.122713313	6.123255178			5.993168695	5.954995204	6.389646199	5.830064383	5.618664536	6.30343158	5.567650881	6.129183885	5.437297567	6.328701064	5.608724085	5.838913175
BCRP3	4.830305409	4.829310755	4.894986292	4.902274621	4.900736207	4.827517541	4.830773541	4.899660188	4.904942788	4.902546106	4.903120894	4.834538784			4.895259013	4.964206513	4.907280352	4.903937406	4.834374933	4.841479839	4.892161979	5.029663003	4.831447986	4.9046537	4.897127216	4.839660693
TAL2	4.755210397	4.754295638	4.751893173	4.833495658	4.756824857	4.752646498	4.755640931	4.755901895	4.760433352	4.833748865	4.758870438	4.903393038			4.752127066	4.900749543	4.762438758	4.759570873	4.834374933	4.841479839	4.824064554	4.761659666	4.831447986	4.760185353	4.670186661	4.763814935
INSL3	5.435473681	5.433885652	5.572191568	5.549702221	5.399470662	5.468374146	5.509944966	5.545576107	5.405592794	5.402105126	5.402941657	5.403337706			5.503592782	5.475800624	5.448012409	5.443039689	5.44196831	5.331466187	5.425505584	5.484342289	5.511065785	5.481732331	5.31248499	5.239315252
SYCP3	4.755210397	4.670696999	4.751893173	4.674165658	4.756824857	4.752646498	4.830773541	4.755901895	4.760433352	4.758377372	4.758870438	4.759103891			4.668742746	4.832073274	4.762438758	4.759570873	4.834374933	4.841479839	4.749471072	4.761659666	4.756261215	4.676005019	4.75372934	4.763814935
TMIE	5.076732377	4.961062731	5.124413185	5.133294986	5.023364134	4.959021888	5.129738602	5.022161454	5.028065533	5.025386996	5.134326058	4.967012072			5.01724184	5.078950039	4.971137515	5.026941938	5.026137212	5.034649503	5.120970451	4.97017379	5.02262968	5.027742458	5.019330183	4.97283973
MUCL1	4.898853994	4.961062731	4.958089577	4.902274621	5.023364134	4.895864666	5.021821388	4.831057292	4.835984234	4.902546106	4.903120894	4.903393038			5.01724184	5.023379039	4.971137515	4.903937406	5.026137212	5.034649503	5.120970451	5.029663003	5.078165685	4.968349985	4.897127216	4.839660693
ATL2	5.021260339	5.02006822	4.958089577	4.965825102	5.023364134	4.959021888	4.899355941	4.963050343	5.028065533	5.133625759	4.966723249	4.967012072			4.958379046	4.964206513	4.907280352	4.903937406	4.903217362	5.090745993	4.95509176	4.906372237	4.96349495	5.136193459	4.960361946	4.908884374
LINC00189	4.671521376	4.670696999	4.751893173	4.674165658	4.756824857	4.827517541	4.755640931	4.67214456	4.676228538	4.833748865	4.674819923	4.834538784			4.895259013	5.274036814	4.838164539	4.759570873	4.578746679	5.563199189	4.749471072	5.590474215	4.672468385	5.322910499	4.960361946	5.088465276
KLHL35	5.356575472	5.395177263	5.503169792	5.440565417	5.438275719	5.392376773	5.436220996	5.357721561	5.279684298	5.402105126	5.479403892	5.479817335			5.391494528	5.547295551	5.448012409	5.480644295	5.403082047	5.597629627	5.305602893	5.520814175	5.437297567	5.405172167	5.354120326	5.239315252
ZNF354B	5.271483177	5.224817412	5.221155733	5.230681282	5.228671091	5.267455142	5.077319638	5.357721561	5.279684298	5.231035996	5.081724113	5.321164816			5.01724184	5.274036814	5.326546993	5.08267923	5.081836958	5.241861901	5.120970451	5.029663003	5.358317046	5.279295022	5.354120326	5.191521938
FOXC1	4.671521376	4.670696999	4.668531973	4.674165658	4.577072651	4.669210836	4.671909376	4.576346741	4.760433352	4.674375544	4.674819923	4.578865217			4.668742746	4.672986662	4.678036016	4.675451203	4.674894505	4.680784654	4.749471072	4.67733381	4.672468385	4.760185353	4.670186661	4.679276406
LINC01198	4.755210397	4.670696999	4.751893173	4.75814449	4.756824857	4.752646498	4.755640931	4.755901895	4.760433352	4.758377372	4.674819923	4.675030326			4.752127066	4.832073274	4.678036016	4.759570873	4.758953191	4.841479839	4.824064554	4.761659666	4.672468385	4.760185353	4.670186661	4.763814935
TRIM42	4.671521376	4.670696999	4.668531973	4.578110585	4.672976353	4.669210836	4.671909376	4.755901895	4.676228538	4.674375544	4.674819923	4.578865217			4.573378088	4.672986662	4.581488511	4.579232538	4.674894505	4.680784654	4.666349345	4.67733381	4.672468385	4.676005019	4.670186661	4.582571142
FSIP1	4.671521376	4.754295638	4.668531973	4.674165658	4.756824857	4.752646498	4.755640931	4.67214456	4.676228538	4.758377372	4.674819923	4.834538784			4.752127066	4.672986662	4.762438758	4.759570873	4.758953191	4.680784654	4.749471072	4.67733381	4.756261215	4.676005019	4.82869499	4.763814935
FAM98B	4.575802893	4.575083476	4.57319416	4.578110585	4.462423319	4.573786562	4.461657081	4.576346741	4.579910968	4.57829376	4.46374734	4.578865217			4.573378088	4.577081647	4.581488511	4.579232538	4.578746679	4.583887599	4.571289567	4.580875628	4.462058523	4.579715888	4.574638121	4.582571142
EFCAB13	5.435473681	5.576692866	5.391097239	5.741494725	5.359251073	5.431022032	5.579212308	5.849619762	4.968656783	5.478530615	5.479403892	5.934858193			5.174301141	6.202720906	5.591930826	5.480644295	5.515928306	5.45329702	5.262464373	5.281608998	5.130619815	5.405172167	5.354120326	5.03247027
FAM71B	4.898853994	4.897787478	4.958089577	4.965825102	4.96419236	5.017918872	4.962727433	4.963050343	4.904942788	5.025386996	5.026029397	4.967012072			5.072526028	5.023379039	4.971137515	4.903937406	4.903217362	5.090745993	5.013779632	4.97017379	5.02262968	4.968349985	4.960361946	5.088465276
CABCOCO1	4.575802893	4.575083476	4.57319416	4.578110585	4.577072651	4.669210836	4.576141497	4.576346741	4.579910968	4.57829376	4.578681588	4.578865217			4.573378088	4.577081647	4.581488511	4.579232538	4.674894505	4.583887599	4.666349345	4.580875628	4.576629343	4.579715888	4.670186661	4.582571142
WEE2-AS1	4.830305409	4.754295638	4.826698385	4.75814449	4.756824857	4.827517541	4.830773541	4.831057292	4.835984234	4.902546106	4.903120894	4.834538784			4.826952719	4.672986662	4.838164539	4.759570873	4.758953191	4.841479839	4.824064554	4.906372237	4.756261215	4.760185353	4.75372934	4.763814935
TCTEX1D1	4.671521376	4.670696999	4.668531973	4.674165658	4.756824857	4.669210836	4.671909376	4.67214456	4.579910968	4.674375544	4.758870438	4.675030326			4.752127066	4.672986662	4.678036016	4.579232538	4.834374933	4.680784654	4.666349345	4.580875628	4.672468385	4.760185353	4.75372934	4.763814935
TMCO5A	4.575802893	4.575083476	4.57319416	4.578110585	4.577072651	4.573786562	4.671909376	4.67214456	4.579910968	4.57829376	4.578681588	4.578865217			4.573378088	4.577081647	4.581488511	4.579232538	4.674894505	4.583887599	4.571289567	4.580875628	4.576629343	4.579715888	4.574638121	4.679276406
PPARGC1B	5.271483177	5.395177263	5.429713635	5.478118123	5.512084125	5.504532086	5.272159431	5.357721561	5.365228746	5.276456696	5.402941657	5.321164816			5.467453006	5.581450289	5.48572119	5.404129882	5.44196831	5.331466187	5.262464373	5.08552719	5.358317046	5.364818036	5.470294105	5.370827271
XKR6	4.830305409	4.829310755	4.751893173	4.833495658	4.900736207	4.827517541	4.899355941	4.831057292	4.760433352	4.758377372	4.758870438	4.759103891			4.826952719	4.964206513	4.762438758	4.835046512	4.758953191	4.841479839	4.892161979	4.837317508	4.831447986	4.676005019	4.82869499	4.763814935
TSGA13	4.671521376	4.670696999	4.668531973	4.674165658	4.672976353	4.669210836	4.576141497	4.67214456	4.676228538	4.674375544	4.674819923	4.675030326			4.668742746	4.832073274	4.678036016	4.759570873	4.578746679	4.765488247	4.749471072	4.67733381	4.831447986	4.760185353	4.670186661	4.763814935
C9orf163	5.509166926	5.471298024	5.572191568	5.549702221	5.475780357	5.638819991	5.612363146	5.579700943	5.444535456	5.584334578	5.515778871	5.58569397			5.729367494	5.646919862	5.591930826	5.51704363	5.772339972	5.414162219	5.752982825	5.914737605	5.795323212	5.481732331	5.506489885	5.488156325
SYNE3	4.898853994	4.829310755	4.894986292	4.902274621	4.832060837	4.959021888	4.830773541	4.899660188	4.904942788	4.758377372	4.834284959	4.834538784			4.958379046	5.078950039	4.907280352	4.903937406	4.903217362	4.910834624	4.824064554	4.837317508	4.900079099	4.968349985	4.75372934	4.839660693
CCDC141	4.830305409	4.670696999	4.751893173	4.833495658	4.756824857	4.669210836	4.671909376	4.755901895	4.760433352	4.674375544	4.674819923	4.675030326			4.752127066	4.756836295	4.762438758	4.759570873	4.674894505	4.765488247	4.749471072	4.761659666	4.672468385	4.760185353	4.670186661	4.839660693
HDX	4.671521376	4.575083476	4.668531973	4.674165658	4.672976353	4.573786562	4.576141497	4.576346741	4.676228538	4.674375544	4.578681588	4.578865217			4.573378088	4.672986662	4.581488511	4.675451203	4.674894505	4.583887599	4.666349345	4.580875628	4.672468385	4.676005019	4.670186661	4.679276406
CDYL2	5.544303408	5.609802316	5.605226979	5.478118123	5.547274504	5.787855355	5.644609838	5.645114208	5.518600723	5.712046233	5.682338706	5.551466769			5.605672533	5.67835167	5.625290019	5.683711093	5.772339972	5.695294815	5.987218498	5.623809594	6.002418466	5.621007329	5.732598711	5.56012582
C18orf54	4.671521376	4.575083476	4.668531973	4.674165658	4.577072651	4.573786562	4.576141497	4.576346741	4.676228538	4.57829376	4.578681588	4.675030326			4.573378088	4.672986662	4.678036016	4.675451203	4.674894505	4.680784654	4.571289567	4.67733381	4.576629343	4.676005019	4.574638121	4.679276406
SYT14	4.575802893	4.575083476	4.57319416	4.578110585	4.577072651	4.573786562	4.671909376	4.576346741	4.579910968	4.57829376	4.578681588	4.578865217			4.573378088	4.672986662	4.678036016	4.675451203	4.674894505	4.583887599	4.571289567	4.67733381	4.672468385	4.676005019	4.75372934	4.582571142
CDC20B	4.671521376	4.754295638	4.826698385	4.674165658	4.756824857	4.827517541	4.830773541	4.67214456	4.676228538	4.674375544	4.674819923	4.759103891			4.752127066	4.756836295	4.678036016	4.759570873	4.758953191	4.765488247	4.666349345	4.761659666	4.756261215	4.760185353	4.75372934	4.839660693
TECTB	5.076732377	5.127827214	5.173956297	4.902274621	5.078934438	5.073234723	5.226867339	5.07767559	5.028065533	5.081051734	5.081724113	5.082042457			5.124745594	5.078950039	5.086589317	5.185271371	5.184361414	5.143722048	5.217463012	5.13828695	5.130619815	5.083517091	5.019330183	4.97283973
VWA3A	4.898853994	4.897787478	4.958089577	4.965825102	4.96419236	4.959021888	5.021821388	4.899660188	4.835984234	4.966113228	4.966723249	4.967012072			5.072526028	5.023379039	5.030677827	5.026941938	5.081836958	4.974909316	5.013779632	5.08552719	5.18039492	5.027742458	4.960361946	4.908884374
LINC00896	4.755210397	4.829310755	4.826698385	4.902274621	4.756824857	4.895864666	4.899355941	4.831057292	4.835984234	4.758377372	4.834284959	4.759103891			4.826952719	4.832073274	4.907280352	4.835046512	4.966825629	4.910834624	4.824064554	4.837317508	4.831447986	4.760185353	4.75372934	4.763814935
HUS1B	4.898853994	4.829310755	4.826698385	4.833495658	4.900736207	4.895864666	4.830773541	4.899660188	4.835984234	4.833748865	4.834284959	4.759103891			4.826952719	4.832073274	4.838164539	4.759570873	4.758953191	5.034649503	4.824064554	4.837317508	4.900079099	4.760185353	4.82869499	4.908884374
NPB	5.764705875	5.733740373	5.814025993	5.770691209	5.767999907	5.638819991	5.706606546	5.645114208	5.653866795	5.799691225	5.772171276	5.713489757			5.841642826	5.904351439	5.65773698	5.960998245	5.772339972	5.869833136	5.600611481	5.834420979	5.823155468	5.858659557	5.640914226	5.722843002
CCDC34	4.575802893	4.670696999	4.668531973	4.674165658	4.672976353	4.669210836	4.671909376	4.67214456	4.676228538	4.57829376	4.674819923	4.675030326			4.668742746	4.672986662	4.678036016	4.675451203	4.674894505	4.841479839	4.666349345	4.580875628	4.672468385	4.676005019	4.670186661	4.679276406
LRCH3	5.314877587	5.313399888	5.309517974	5.440565417	5.438275719	5.352324918	5.436220996	5.357721561	5.482171416	5.402105126	5.32078794	5.363026837			5.309895962	5.228688517	5.408993433	5.683711093	5.403082047	5.331466187	5.386982099	5.325289854	5.358317046	5.405172167	5.354120326	5.284990894
INTS4	4.671521376	4.754295638	4.751893173	4.674165658	4.672976353	4.827517541	4.671909376	4.67214456	4.676228538	4.674375544	4.758870438	4.759103891			4.752127066	4.672986662	4.762438758	4.675451203	4.674894505	4.765488247	4.749471072	4.67733381	4.672468385	4.760185353	4.960361946	4.679276406
ENAH	4.755210397	4.829310755	4.668531973	4.833495658	4.756824857	4.752646498	4.755640931	4.831057292	4.835984234	4.758377372	4.758870438	4.834538784			4.826952719	4.756836295	4.762438758	4.759570873	4.834374933	4.841479839	5.013779632	4.906372237	4.831447986	4.9046537	4.960361946	4.908884374
STK35	4.898853994	4.754295638	4.826698385	5.025083574	4.900736207	4.827517541	4.899355941	4.831057292	4.835984234	4.833748865	4.758870438	4.759103891			5.072526028	5.023379039	4.838164539	4.903937406	4.966825629	4.910834624	5.013779632	5.029663003	5.02262968	4.9046537	4.82869499	4.908884374
LRRIQ3	4.755210397	4.670696999	4.751893173	4.674165658	4.832060837	4.669210836	4.830773541	4.755901895	4.760433352	4.674375544	4.674819923	4.834538784			4.668742746	4.672986662	4.678036016	4.675451203	4.674894505	4.680784654	4.749471072	4.761659666	4.831447986	4.760185353	4.75372934	4.679276406
KLC4	5.021260339	5.02006822	4.958089577	5.08073415	5.023364134	5.073234723	5.021821388	5.13010935	5.028065533	5.025386996	4.966723249	4.903393038			4.958379046	5.023379039	5.030677827	5.026941938	4.966825629	5.034649503	4.95509176	5.08552719	5.02262968	4.968349985	4.960361946	4.97283973
TIPRL	6.852144484	6.993962087	6.608981812	6.781960893	6.751213816	6.894733291	6.573135306	7.087226309	7.100383047	6.860985049	6.700851805	6.784595881			6.363812997	6.445860183	6.652040687	6.876965104	6.468285423	6.551304293	6.632134434	6.573285767	6.803375794	6.675529427	6.715126524	6.850408817
VKORC1L1	4.671521376	4.670696999	4.668531973	4.674165658	4.672976353	4.669210836	4.671909376	4.755901895	4.760433352	4.674375544	4.674819923	4.675030326			4.668742746	4.756836295	4.762438758	4.675451203	4.674894505	4.583887599	4.749471072	4.67733381	4.672468385	4.676005019	4.670186661	4.679276406
PRF1	9.285271358	9.422689336	8.697004676	8.449952608	9.45024392	9.464263743	8.905924316	8.879500535	9.339869503	9.31689771	9.131740363	9.917997042			8.019630961	8.13630756	8.439075935	8.547232778	8.696626497	8.474351784	8.400028515	8.905254079	8.895970221	8.711268671	9.420708259	9.179509032
FBXL14	4.830305409	4.897787478	4.894986292	4.75814449	4.900736207	5.017918872	4.899355941	4.899660188	4.968656783	4.833748865	4.966723249	4.967012072			4.895259013	4.900749543	4.907280352	4.835046512	4.758953191	4.910834624	4.892161979	4.906372237	4.831447986	5.027742458	4.82869499	4.908884374
PPIL6	4.575802893	4.670696999	4.668531973	4.674165658	4.577072651	4.669210836	4.671909376	4.576346741	4.579910968	4.57829376	4.674819923	4.578865217			4.668742746	4.756836295	4.678036016	4.579232538	4.578746679	4.583887599	4.571289567	4.67733381	4.672468385	4.676005019	4.670186661	4.582571142
SP1	5.271483177	5.224817412	5.309517974	5.319615918	5.317485076	5.175066943	5.272159431	5.13010935	5.405592794	5.276456696	5.362640132	5.479817335			5.266638909	5.181242373	5.237220415	5.185271371	5.36277721	5.287615833	5.347058047	5.281608998	5.273133659	5.518153022	5.394215697	5.722843002
C18orf25	5.021260339	4.829310755	4.826698385	4.902274621	4.756824857	4.752646498	4.671909376	4.755901895	4.968656783	4.833748865	4.834284959	4.903393038			4.958379046	4.900749543	4.971137515	4.903937406	4.834374933	4.910834624	4.95509176	4.906372237	4.756261215	5.027742458	4.82869499	5.03247027
METTL6	5.129126928	5.075484552	5.124413185	5.08073415	5.131420513	5.073234723	5.129738602	5.07767559	5.083855234	5.133625759	5.026029397	5.02633355			5.124745594	5.131436762	4.971137515	5.185271371	5.277360745	5.193985542	5.347058047	5.13828695	5.130619815	5.136193459	5.019330183	5.088465276
SGO1	5.076732377	5.127827214	5.221155733	5.08073415	5.181225517	5.175066943	5.179480794	5.17986539	5.083855234	5.183513073	5.231786974	5.02633355			5.174301141	5.228688517	5.139393123	5.232853712	5.184361414	5.090745993	5.170384704	5.13828695	5.31657482	5.136193459	5.176663242	5.141346844
B3GALNT2	4.755210397	4.670696999	4.668531973	4.75814449	4.672976353	4.669210836	4.671909376	4.67214456	4.676228538	4.674375544	4.674819923	4.675030326			4.668742746	4.672986662	4.678036016	4.675451203	4.674894505	4.765488247	4.666349345	4.67733381	4.672468385	4.760185353	4.670186661	4.679276406
CBR4	6.219175292	6.404769679	6.450178482	6.532231009	6.544798815	6.501750108	6.47657878	6.649399851	6.78824463	6.670678848	6.657347813	6.72974495			6.289952216	6.428641061	6.543393466	6.435583936	6.380928984	6.243805772	6.078909032	6.332333192	6.002418466	6.251210012	6.385702402	6.428819735
PIK3C2A	5.178846269	5.224817412	5.266271351	5.319615918	5.131420513	5.267455142	5.357289055	5.022161454	5.136545634	5.276456696	5.231786974	5.321164816			5.124745594	5.078950039	4.971137515	5.08267923	5.081836958	5.241861901	5.217463012	5.188348072	5.130619815	5.136193459	5.019330183	5.239315252
NLRX1	5.396730309	5.54261949	5.538195299	5.514467843	5.512084125	5.504532086	5.473682467	5.357721561	5.444535456	5.550130578	5.551037433	5.551466769			5.391494528	5.581450289	5.48572119	5.480644295	5.479550448	5.491116316	5.462741452	5.446661785	5.546237355	5.587717059	5.506489885	5.594503102
ZNF569	5.226211339	5.224817412	5.173956297	5.08073415	5.023364134	5.125483784	5.077319638	5.07767559	5.083855234	5.081051734	5.026029397	5.134657618			4.958379046	5.023379039	5.030677827	5.026941938	5.026137212	5.034649503	4.95509176	4.97017379	4.96349495	4.9046537	4.960361946	4.97283973
CCSAP	4.671521376	4.575083476	4.668531973	4.674165658	4.577072651	4.573786562	4.576141497	4.67214456	4.676228538	4.674375544	4.674819923	4.675030326			4.668742746	4.672986662	4.678036016	4.675451203	4.674894505	4.583887599	4.571289567	4.67733381	4.576629343	4.579715888	4.574638121	4.582571142
DUSP18	5.578406099	5.609802316	5.637362702	5.583898782	5.64689776	5.670132517	5.644609838	5.736977583	5.588180918	5.51488844	5.682338706	5.551466769			5.572629907	5.67835167	5.65773698	5.51704363	5.403082047	5.597629627	5.72400799	5.718565495	5.823155468	5.587717059	5.608724085	5.627904316
ZNF697	4.962194691	4.961062731	4.958089577	5.025083574	4.96419236	4.895864666	4.962727433	4.963050343	5.028065533	5.025386996	4.903120894	4.967012072			4.958379046	5.131436762	5.030677827	5.026941938	4.966825629	4.974909316	5.013779632	5.08552719	5.02262968	4.8357146	4.960361946	4.908884374
ZNF791	7.722642716	7.958801924	7.612995211	7.869068697	7.858615311	7.924219604	7.980427791	7.986986011	7.913281034	7.906705161	7.908283274	7.945003558			7.576570017	7.664721918	7.717666123	7.952411381	7.748091042	7.761807083	7.331453572	7.736069074	7.471594238	7.57109875	7.504162391	7.707894792
CHRM3	4.671521376	4.829310755	4.668531973	4.674165658	4.672976353	4.752646498	4.755640931	4.755901895	4.760433352	4.758377372	4.834284959	4.675030326			4.752127066	4.756836295	4.762438758	4.759570873	4.674894505	4.680784654	4.824064554	4.761659666	4.900079099	4.760185353	4.670186661	4.679276406
HTRA4	4.962194691	4.829310755	4.894986292	4.833495658	4.832060837	4.827517541	4.962727433	4.899660188	4.904942788	4.833748865	4.758870438	4.834538784			4.826952719	4.832073274	4.838164539	4.835046512	4.758953191	4.910834624	4.749471072	4.837317508	4.900079099	4.8357146	4.897127216	4.839660693
LINC00525	4.671521376	4.575083476	4.57319416	4.674165658	4.672976353	4.752646498	4.671909376	4.755901895	4.676228538	4.674375544	4.674819923	4.578865217			4.668742746	4.672986662	4.581488511	4.675451203	4.674894505	4.583887599	4.824064554	4.580875628	4.900079099	4.676005019	4.82869499	4.679276406
PRPF38A	7.237699509	6.874710966	7.086231147	7.004990723	6.954667802	7.056136046	6.915369963	7.097925264	7.089579517	7.072748731	7.127749036	7.268446879			6.778727535	6.737483197	6.84660123	6.731012859	6.810812697	6.675016592	6.675401988	6.722600504	6.763294341	6.95230361	7.048342342	7.066384371
FAM218A	4.575802893	4.575083476	4.668531973	4.674165658	4.672976353	4.752646498	4.755640931	4.67214456	4.676228538	4.57829376	4.578681588	4.759103891			4.668742746	4.672986662	4.678036016	4.675451203	4.674894505	4.680784654	4.666349345	4.67733381	4.672468385	4.676005019	4.574638121	4.763814935
RHEBL1	5.820960356	5.898873658	5.728895689	5.649447106	5.851568653	5.787855355	5.736451746	5.612859804	5.716130506	5.741963639	5.71302594	5.883084877			5.758410422	5.738860055	5.689327521	5.857363544	5.934530519	5.631081863	5.567650881	5.888531134	5.877021718	5.684914848	5.732598711	5.450397638
MCRIP2	6.475469966	6.404769679	6.531888698	6.516024494	6.544798815	6.565237854	6.425603034	6.460468016	6.420289769	6.432554941	6.344133971	6.451643367			6.5945284	6.512631915	6.527143979	6.629423736	6.380928984	6.202515408	6.509604968	6.084507731	6.201348807	6.365826852	6.454894241	6.728423389
ZNF548	6.67663947	6.630321056	6.450178482	6.449197386	6.479626591	6.580659449	6.761592488	6.649399851	6.420289769	6.449791229	6.36255231	6.582251823			6.51654503	6.095922739	6.216069575	6.614279328	6.485100773	6.518548226	6.744628746	6.387699054	6.543325105	6.365826852	6.613878874	6.374854555
AMER2	5.129126928	5.270046201	5.124413185	5.08073415	5.181225517	5.125483784	5.226867339	5.272569315	5.136545634	5.133625759	5.184239499	5.184583429			5.174301141	5.274036814	5.326546993	5.135320824	5.277360745	5.331466187	5.217463012	5.188348072	5.358317046	5.233789464	5.223954398	5.141346844
RNF152	4.575802893	4.575083476	4.57319416	4.674165658	4.577072651	4.669210836	4.671909376	4.576346741	4.579910968	4.674375544	4.674819923	4.578865217			4.573378088	4.756836295	4.678036016	4.675451203	4.674894505	4.583887599	4.571289567	4.67733381	4.672468385	4.579715888	4.670186661	4.679276406
ADGRG3	5.021260339	5.270046201	5.016936974	5.08073415	5.131420513	5.073234723	5.129738602	5.022161454	5.136545634	5.231035996	5.231786974	5.082042457			5.841642826	6.117989662	5.65773698	5.321918649	5.800879291	6.599012568	5.386982099	6.107036912	5.953732007	6.827347356	5.506489885	7.043967171
ZNF644	5.396730309	5.395177263	5.173956297	5.276091045	5.274018851	5.22230402	5.179480794	5.315994494	5.405592794	5.36182334	5.231786974	5.277597336			5.391494528	5.399490075	5.326546993	5.232853712	5.231913008	5.193985542	5.120970451	5.236034308	5.31657482	5.233789464	5.31248499	5.191521938
TBC1D32	4.755210397	4.670696999	4.668531973	4.674165658	4.672976353	4.752646498	4.755640931	4.755901895	4.760433352	4.758377372	4.674819923	4.759103891			4.752127066	4.672986662	4.678036016	4.675451203	4.578746679	4.765488247	4.666349345	4.67733381	4.672468385	4.760185353	4.75372934	4.679276406
B4GALNT3	5.356575472	5.177497987	5.221155733	5.401709994	5.317485076	5.352324918	5.357289055	5.357721561	5.279684298	5.319991913	5.32078794	5.232142525			5.391494528	5.274036814	5.282831612	5.27833044	5.403082047	5.287615833	5.498788233	5.281608998	5.31657482	5.186176547	5.223954398	5.191521938
LRRC43	6.719159669	6.947475121	6.916824546	6.872979312	6.989720673	6.918962548	6.997820244	6.841331787	6.774724335	6.873630315	6.936585629	6.657972273			7.097514108	7.089942721	6.909971221	7.00907056	7.085293955	7.03739917	7.141506302	7.18754967	7.306745038	6.95230361	6.860618504	6.625502597
CEP89	5.314877587	5.224817412	5.391097239	5.230681282	5.359251073	5.267455142	5.357289055	5.357721561	5.279684298	5.319991913	5.277230825	5.363026837			5.35146356	5.399490075	5.368549262	5.404129882	5.320921533	5.287615833	5.498788233	5.367259387	5.358317046	5.444105384	5.354120326	5.239315252
AK7	4.575802893	4.575083476	4.57319416	4.674165658	4.577072651	4.573786562	4.576141497	4.67214456	4.579910968	4.57829376	4.578681588	4.675030326			4.668742746	4.577081647	4.581488511	4.579232538	4.674894505	4.583887599	4.666349345	4.67733381	4.576629343	4.579715888	4.574638121	4.763814935
ZFC3H1	5.226211339	5.127827214	4.894986292	5.133294986	5.181225517	4.895864666	4.899355941	4.831057292	4.835984234	4.902546106	5.026029397	4.834538784			5.503592782	5.61463786	5.522220105	5.363800328	5.585412013	5.527720859	5.068901814	5.407672444	5.358317046	5.322910499	5.176663242	5.088465276
IRAK2	4.575802893	4.575083476	4.668531973	4.578110585	4.577072651	4.669210836	4.576141497	4.576346741	4.579910968	4.57829376	4.578681588	4.578865217			4.573378088	4.577081647	4.581488511	4.675451203	4.578746679	4.583887599	4.571289567	4.580875628	4.576629343	4.579715888	4.670186661	4.582571142
LINC00337	4.671521376	4.670696999	4.668531973	4.674165658	4.672976353	4.669210836	4.671909376	4.576346741	4.676228538	4.674375544	4.578681588	4.675030326			4.668742746	4.672986662	4.581488511	4.675451203	4.578746679	4.680784654	4.749471072	4.67733381	4.672468385	4.676005019	4.670186661	4.763814935
METTL21A	5.874778949	5.703930746	5.893689395	5.799210667	5.708960548	5.730415168	5.794042325	5.794581246	5.831863608	5.82757379	5.742956335	5.743426299			5.841642826	5.708983287	5.836045187	5.773599022	5.800879291	5.922969332	5.663897072	5.656233669	5.613543597	5.653388047	5.575632073	5.722843002
OTOGL	4.671521376	4.670696999	4.668531973	4.75814449	4.672976353	4.669210836	4.830773541	4.755901895	4.760433352	4.674375544	4.674819923	4.578865217			4.668742746	4.672986662	4.678036016	4.675451203	4.674894505	4.680784654	4.666349345	4.67733381	4.672468385	4.676005019	4.574638121	4.679276406
MGC16025	4.575802893	4.575083476	4.668531973	4.674165658	4.672976353	4.669210836	4.671909376	4.576346741	4.676228538	4.674375544	4.674819923	4.578865217			4.668742746	4.672986662	4.581488511	4.675451203	4.674894505	4.680784654	4.571289567	4.580875628	4.672468385	4.579715888	4.670186661	4.679276406
FAM76B	6.864768872	7.060923436	6.723982833	6.970205543	7.100612982	6.870075801	6.801660396	6.748689101	6.940999562	6.782600647	6.81058427	6.85024461			6.830800908	6.930833989	6.87229595	6.744934194	6.849825543	6.841985834	6.5255352	7.071255033	6.842332874	6.827347356	6.312765424	6.64068473
SPATA25	4.830305409	4.897787478	4.826698385	4.833495658	4.900736207	4.752646498	4.830773541	4.755901895	4.835984234	4.902546106	4.903120894	4.759103891			4.895259013	4.832073274	4.971137515	4.835046512	4.903217362	4.910834624	4.892161979	4.761659666	4.831447986	4.8357146	4.75372934	4.908884374
NXNL1	6.069752223	6.216977549	6.084509773	6.053605434	5.979555855	6.01793201	6.199868462	6.179828474	5.987547058	6.143294316	6.055253575	6.123255178			6.107038552	6.139690318	6.315266938	6.249728378	6.00843371	6.223321412	5.96323731	6.332333192	6.180680559	6.034925516	5.732598711	5.838913175
GLIS3-AS1	4.898853994	4.897787478	4.894986292	4.833495658	4.756824857	4.895864666	4.899355941	4.831057292	4.835984234	4.833748865	4.903120894	4.834538784			4.895259013	4.964206513	4.971137515	4.835046512	5.026137212	4.974909316	4.95509176	4.97017379	4.900079099	4.8357146	4.897127216	4.839660693
IQCG	4.671521376	4.575083476	4.668531973	4.75814449	4.672976353	4.669210836	4.671909376	4.67214456	4.579910968	4.674375544	4.674819923	4.675030326			4.752127066	4.756836295	4.678036016	4.675451203	4.674894505	4.680784654	4.666349345	4.67733381	4.756261215	4.760185353	4.670186661	4.679276406
MCM9	4.671521376	4.670696999	4.668531973	4.674165658	4.672976353	4.573786562	4.671909376	4.67214456	4.760433352	4.57829376	4.674819923	4.675030326			4.668742746	4.756836295	4.762438758	4.675451203	4.674894505	4.765488247	4.571289567	4.67733381	4.576629343	4.579715888	4.574638121	4.582571142
PRR14L	4.962194691	4.897787478	4.894986292	4.833495658	4.900736207	4.959021888	4.830773541	4.831057292	4.904942788	4.902546106	4.966723249	4.834538784			4.826952719	4.832073274	4.907280352	4.903937406	4.903217362	4.974909316	5.013779632	4.906372237	5.02262968	4.9046537	4.960361946	4.839660693
AJUBA	4.671521376	4.670696999	4.751893173	4.674165658	4.672976353	4.669210836	4.671909376	4.755901895	4.676228538	4.674375544	4.674819923	4.675030326			4.668742746	4.672986662	4.678036016	4.675451203	4.758953191	4.765488247	4.666349345	4.67733381	4.576629343	4.676005019	4.670186661	4.763814935
KLHL32	4.671521376	4.575083476	4.57319416	4.578110585	4.577072651	4.669210836	4.576141497	4.576346741	4.579910968	4.57829376	4.578681588	4.675030326			4.573378088	4.577081647	4.581488511	4.579232538	4.578746679	4.765488247	4.571289567	4.580875628	4.576629343	4.579715888	4.574638121	4.582571142
DCBLD1	4.898853994	4.829310755	4.894986292	4.75814449	4.900736207	4.752646498	4.755640931	4.899660188	4.835984234	4.833748865	4.903120894	4.834538784			4.958379046	4.900749543	4.838164539	4.903937406	4.966825629	5.034649503	4.95509176	4.906372237	4.96349495	4.968349985	5.019330183	5.03247027
SLAMF9	5.021260339	5.02006822	5.173956297	5.133294986	5.078934438	5.125483784	5.129738602	5.13010935	5.028065533	5.081051734	5.081724113	5.082042457			5.124745594	5.181242373	5.139393123	5.135320824	5.184361414	5.193985542	5.217463012	5.236034308	5.130619815	5.136193459	5.127022547	5.141346844
GK5	5.271483177	5.609802316	5.124413185	5.319615918	5.512084125	5.468374146	5.272159431	5.272569315	5.518600723	5.550130578	5.32078794	5.713489757			5.174301141	5.228688517	5.326546993	5.480644295	5.403082047	5.287615833	5.217463012	5.446661785	5.130619815	5.279295022	5.269156525	5.088465276
LOC152048	4.755210397	4.829310755	4.894986292	4.75814449	4.832060837	4.827517541	4.830773541	4.67214456	4.676228538	4.758377372	4.758870438	4.759103891			4.752127066	4.900749543	4.762438758	4.903937406	4.834374933	4.765488247	4.749471072	4.837317508	4.96349495	4.760185353	4.82869499	4.763814935
UBE2U	4.575802893	4.575083476	4.57319416	4.578110585	4.577072651	4.573786562	4.576141497	4.67214456	4.579910968	4.57829376	4.578681588	4.578865217			4.573378088	4.577081647	4.581488511	4.579232538	4.674894505	4.583887599	4.571289567	4.580875628	4.576629343	4.676005019	4.670186661	4.582571142
METTL27	5.076732377	5.02006822	5.072206902	4.965825102	5.023364134	5.017918872	5.021821388	4.963050343	5.028065533	5.025386996	5.026029397	4.903393038			5.072526028	5.023379039	5.086589317	5.08267923	4.966825629	5.034649503	5.013779632	5.029663003	5.078165685	4.968349985	4.897127216	5.03247027
LINC00638	5.226211339	5.313399888	5.467038197	5.319615918	5.317485076	5.468374146	5.357289055	5.22726495	5.365228746	5.36182334	5.402941657	5.321164816			5.35146356	5.51210479	5.368549262	5.321918649	5.551189623	5.45329702	5.386982099	5.407672444	5.546237355	5.405172167	5.394215697	5.284990894
ZC3HAV1L	4.575802893	4.575083476	4.57319416	4.578110585	4.577072651	4.669210836	4.576141497	4.576346741	4.579910968	4.57829376	4.578681588	4.578865217			4.573378088	4.577081647	4.581488511	4.579232538	4.578746679	4.583887599	4.571289567	4.580875628	4.576629343	4.579715888	4.574638121	4.582571142
RASGEF1B	4.830305409	4.829310755	4.826698385	4.902274621	4.756824857	4.827517541	4.830773541	4.831057292	4.760433352	4.833748865	4.834284959	4.834538784			4.826952719	4.964206513	4.838164539	4.835046512	4.834374933	4.765488247	4.824064554	4.906372237	4.900079099	4.9046537	4.897127216	4.763814935
C11orf45	4.755210397	4.670696999	4.751893173	4.75814449	4.672976353	4.669210836	4.671909376	4.67214456	4.760433352	4.758377372	4.834284959	4.675030326			4.752127066	4.672986662	4.678036016	4.675451203	4.834374933	4.680784654	4.666349345	4.67733381	4.672468385	4.676005019	4.670186661	4.763814935
C21orf58	5.021260339	4.961062731	4.894986292	5.025083574	4.96419236	5.073234723	5.077319638	5.022161454	4.968656783	5.025386996	4.903120894	4.967012072			4.826952719	5.078950039	5.139393123	5.185271371	5.026137212	5.034649503	5.013779632	4.97017379	5.078165685	5.027742458	5.074712018	5.03247027
KIAA1109	4.671521376	4.575083476	4.57319416	4.674165658	4.672976353	4.573786562	4.576141497	4.67214456	4.579910968	4.57829376	4.674819923	4.675030326			4.668742746	4.672986662	4.678036016	4.675451203	4.674894505	4.583887599	4.666349345	4.580875628	4.576629343	4.676005019	4.670186661	4.679276406
STOML3	4.671521376	4.670696999	4.668531973	4.674165658	4.672976353	4.669210836	4.755640931	4.67214456	4.676228538	4.674375544	4.758870438	4.675030326			4.668742746	4.672986662	4.678036016	4.675451203	4.674894505	4.680784654	4.749471072	4.761659666	4.756261215	4.676005019	4.75372934	4.679276406
SILC1	4.755210397	4.754295638	4.826698385	4.75814449	4.832060837	4.752646498	4.755640931	4.755901895	4.760433352	4.758377372	4.834284959	4.759103891			4.752127066	4.832073274	4.838164539	4.759570873	4.674894505	4.765488247	4.892161979	4.761659666	4.900079099	4.8357146	4.670186661	4.763814935
FBXL13	4.671521376	4.575083476	4.668531973	4.674165658	4.672976353	4.669210836	4.671909376	4.576346741	4.676228538	4.674375544	4.674819923	4.675030326			5.01724184	5.023379039	4.838164539	4.835046512	4.903217362	5.331466187	4.749471072	4.761659666	5.02262968	5.233789464	4.75372934	5.141346844
FAM227B	4.575802893	4.575083476	4.57319416	4.674165658	4.577072651	4.573786562	4.576141497	4.67214456	4.579910968	4.57829376	4.578681588	4.578865217			4.573378088	4.672986662	4.581488511	4.579232538	4.578746679	4.583887599	4.571289567	4.580875628	4.576629343	4.676005019	4.574638121	4.679276406
DTD2	5.021260339	4.961062731	4.894986292	4.833495658	4.900736207	4.895864666	4.899355941	4.963050343	5.028065533	4.833748865	4.903120894	4.903393038			4.895259013	4.964206513	4.838164539	4.903937406	4.834374933	4.910834624	4.824064554	4.837317508	4.831447986	4.9046537	4.82869499	4.908884374
SOX3	4.962194691	4.829310755	4.958089577	4.833495658	4.900736207	5.125483784	5.021821388	4.899660188	4.835984234	4.833748865	4.903120894	4.967012072			4.958379046	4.900749543	4.907280352	4.903937406	4.966825629	5.034649503	5.013779632	4.837317508	4.900079099	4.9046537	4.897127216	4.908884374
SPATA32	6.371551473	6.439372428	6.398681385	6.516024494	6.339060988	6.347023782	6.509529828	6.373285337	6.291122331	6.342911647	6.468073577	6.534727148			6.5003993	6.723583061	6.527143979	6.382474886	6.434016549	6.415266089	6.5255352	6.475208849	6.574769561	6.58509521	6.536699526	6.411069882
C3orf49	4.755210397	4.829310755	4.826698385	4.902274621	4.832060837	4.827517541	4.830773541	4.831057292	4.760433352	4.833748865	4.903120894	4.903393038			4.826952719	4.832073274	4.907280352	4.835046512	4.834374933	4.841479839	4.824064554	4.906372237	5.02262968	4.8357146	4.75372934	4.763814935
NKX2-3	4.671521376	4.575083476	4.668531973	4.578110585	4.577072651	4.573786562	4.576141497	4.576346741	4.579910968	4.57829376	4.578681588	4.578865217			4.668742746	4.577081647	4.581488511	4.579232538	4.578746679	4.680784654	4.571289567	4.67733381	4.576629343	4.579715888	4.574638121	4.582571142
TMEM252	4.671521376	4.754295638	4.751893173	4.75814449	4.756824857	4.827517541	4.830773541	4.755901895	4.676228538	4.758377372	4.674819923	4.759103891			4.752127066	4.832073274	4.762438758	4.759570873	4.903217362	4.841479839	4.824064554	4.837317508	4.831447986	4.9046537	4.82869499	4.763814935
CIP2A	4.575802893	4.575083476	4.668531973	4.674165658	4.577072651	4.573786562	4.576141497	4.67214456	4.579910968	4.57829376	4.674819923	4.578865217			4.668742746	4.577081647	4.678036016	4.675451203	4.674894505	4.583887599	4.571289567	4.580875628	4.756261215	4.676005019	4.82869499	4.679276406
FAM222A-AS1	4.755210397	4.670696999	4.751893173	4.674165658	4.756824857	4.669210836	4.755640931	4.755901895	4.676228538	4.758377372	4.674819923	4.675030326			4.752127066	4.756836295	4.678036016	4.675451203	4.674894505	4.680784654	4.749471072	4.67733381	4.756261215	4.676005019	4.670186661	4.763814935
TLE6	4.830305409	4.829310755	4.826698385	4.833495658	4.756824857	4.752646498	4.962727433	4.755901895	4.760433352	4.833748865	4.758870438	4.834538784			4.752127066	4.832073274	4.971137515	4.835046512	4.903217362	4.910834624	4.95509176	4.837317508	4.96349495	4.8357146	4.82869499	4.839660693
TCEANC	5.178846269	5.02006822	4.958089577	4.965825102	4.96419236	4.959021888	5.021821388	5.13010935	4.968656783	5.081051734	5.081724113	5.02633355			4.895259013	4.832073274	4.971137515	4.759570873	4.966825629	4.841479839	5.068901814	5.029663003	4.831447986	4.9046537	5.074712018	5.03247027
HECTD4	4.830305409	4.897787478	4.751893173	4.75814449	4.832060837	4.827517541	4.755640931	4.755901895	4.835984234	4.833748865	4.758870438	4.759103891			4.826952719	4.756836295	4.678036016	4.903937406	4.758953191	4.765488247	4.824064554	4.761659666	4.831447986	4.760185353	4.670186661	4.763814935
RTP1	4.575802893	4.575083476	4.668531973	4.578110585	4.577072651	4.573786562	4.671909376	4.576346741	4.676228538	4.674375544	4.578681588	4.578865217			4.573378088	4.577081647	4.581488511	4.675451203	4.578746679	4.680784654	4.571289567	4.580875628	4.576629343	4.579715888	4.574638121	4.582571142
PRR35	5.435473681	5.673368755	5.668653729	5.478118123	5.438275719	5.504532086	5.612363146	5.510416531	5.405592794	5.649896911	5.618507166	5.618951112			5.605672533	5.646919862	5.48572119	5.586567617	5.68250086	5.726162192	5.632675277	5.590474215	5.766850073	5.553455349	5.506489885	5.56012582
NXPE1	4.898853994	4.829310755	4.894986292	4.833495658	4.900736207	4.827517541	4.899355941	4.899660188	4.904942788	4.758377372	4.903120894	4.903393038			4.895259013	4.964206513	4.971137515	4.835046512	4.966825629	4.910834624	4.95509176	4.97017379	4.900079099	4.968349985	4.82869499	4.908884374
CYP1B1-AS1	4.671521376	4.754295638	4.668531973	4.674165658	4.672976353	4.669210836	4.671909376	4.67214456	4.760433352	4.674375544	4.674819923	4.675030326			4.668742746	4.672986662	4.762438758	4.579232538	4.674894505	4.583887599	4.749471072	4.67733381	4.672468385	4.676005019	4.75372934	4.679276406
APOBEC3D	4.830305409	4.829310755	4.894986292	4.833495658	4.900736207	4.895864666	4.962727433	4.831057292	4.835984234	4.833748865	4.834284959	4.903393038			4.958379046	5.023379039	4.907280352	5.026941938	4.903217362	4.910834624	4.892161979	4.837317508	5.02262968	4.968349985	4.82869499	4.908884374
LINC00315	5.764705875	5.846226641	5.668653729	5.617126507	5.678329243	5.700649218	5.875697938	5.612859804	5.588180918	5.649896911	5.828602833	5.743426299			5.786781544	5.738860055	5.942104818	5.714417451	5.800879291	5.814347965	5.694326353	5.718565495	5.877021718	5.803420853	5.672257627	5.627904316
COL6A5	4.575802893	4.575083476	4.57319416	4.578110585	4.577072651	4.669210836	4.671909376	4.576346741	4.579910968	4.57829376	4.674819923	4.578865217			4.668742746	4.577081647	4.581488511	4.675451203	4.674894505	4.680784654	4.666349345	4.580875628	4.672468385	4.579715888	4.75372934	4.582571142
PGAM5	4.830305409	4.961062731	4.894986292	4.902274621	5.023364134	4.827517541	4.899355941	4.831057292	4.968656783	4.966113228	4.834284959	4.834538784			4.958379046	5.023379039	4.971137515	4.903937406	5.081836958	4.841479839	4.892161979	4.97017379	5.078165685	4.8357146	4.960361946	4.839660693
C4orf45	4.671521376	4.575083476	4.57319416	4.578110585	4.672976353	4.573786562	4.671909376	4.576346741	4.579910968	4.674375544	4.674819923	4.675030326			4.668742746	4.577081647	4.678036016	4.675451203	4.578746679	4.680784654	4.571289567	4.67733381	4.756261215	4.676005019	4.75372934	4.582571142
CCDC149	5.178846269	5.177497987	5.467038197	5.230681282	5.359251073	5.22230402	5.272159431	5.272569315	5.186541852	5.276456696	5.32078794	5.232142525			5.266638909	5.317503549	5.326546993	5.321918649	5.36277721	5.241861901	5.425505584	5.281608998	5.273133659	5.279295022	5.269156525	5.284990894
BEND2	5.643777661	5.924394797	5.605226979	5.770691209	5.228671091	5.073234723	6.136893184	5.545576107	5.588180918	5.402105126	5.934350579	5.651299987			5.430119888	5.131436762	5.916413596	5.51704363	5.85606051	5.842398698	5.386982099	5.623809594	5.398514037	5.774851309	5.269156525	5.919372936
C10orf67	5.396730309	5.433885652	5.503169792	5.361437534	5.475780357	5.310735353	5.612363146	5.436673943	5.234167106	5.478530615	5.362640132	5.403337706			5.699615317	5.51210479	5.282831612	5.480644295	5.515928306	5.45329702	5.752982825	5.484342289	5.707839955	5.279295022	5.354120326	5.284990894
CBY2	4.898853994	4.897787478	4.894986292	4.833495658	4.96419236	4.959021888	4.962727433	4.831057292	4.904942788	4.902546106	4.966723249	4.834538784			4.958379046	5.023379039	4.838164539	4.903937406	5.081836958	4.974909316	4.95509176	4.97017379	4.96349495	4.760185353	4.897127216	4.908884374
CCDC26	4.575802893	4.670696999	4.57319416	4.578110585	4.577072651	4.752646498	4.671909376	4.67214456	4.579910968	4.57829376	4.578681588	4.578865217			4.573378088	4.577081647	4.581488511	4.579232538	4.578746679	4.583887599	4.666349345	4.580875628	4.672468385	4.676005019	4.670186661	4.582571142
B3GALT5-AS1	4.671521376	4.670696999	4.668531973	4.674165658	4.672976353	4.669210836	4.671909376	4.67214456	4.676228538	4.674375544	4.674819923	4.675030326			4.752127066	4.756836295	4.678036016	4.675451203	4.758953191	4.765488247	4.749471072	4.67733381	4.672468385	4.676005019	4.670186661	4.679276406
SPIC	4.575802893	4.575083476	4.668531973	4.578110585	4.672976353	4.573786562	4.576141497	4.576346741	4.676228538	4.463428184	4.578681588	4.578865217			4.573378088	4.672986662	4.581488511	4.579232538	4.578746679	4.583887599	4.571289567	4.580875628	4.576629343	4.676005019	4.670186661	4.582571142
VPS13B	4.898853994	4.754295638	4.826698385	4.965825102	4.832060837	4.827517541	4.755640931	4.755901895	4.904942788	4.758377372	4.966723249	4.759103891			4.752127066	4.832073274	4.907280352	4.759570873	4.834374933	4.974909316	4.824064554	4.906372237	4.900079099	5.083517091	4.960361946	4.908884374
P2RY10	7.275725547	6.947475121	6.681973823	7.09374278	6.544798815	6.793369815	7.00921226	7.170624085	6.916674492	6.699520336	6.672002194	6.72974495			6.532501779	6.496243835	6.922306968	6.659221139	6.686725161	6.774842332	6.848663276	6.805006283	6.829468079	6.787564216	6.504564862	6.901369191
IGSF22	5.735584141	5.355059147	5.572191568	5.680916057	5.581428876	5.431022032	5.545095828	5.510416531	5.62147878	5.550130578	5.618507166	5.618951112			5.758410422	5.547295551	5.720112039	5.586567617	5.44196831	5.785648807	5.72400799	5.590474215	5.580373693	5.405172167	5.575632073	5.660391662
ZBTB3	5.643777661	5.609802316	5.429713635	5.583898782	5.512084125	5.606661931	5.545095828	5.766116955	5.685400618	5.68137247	5.800708563	5.959973532			5.467453006	5.51210479	5.368549262	5.443039689	5.551189623	5.45329702	5.632675277	5.590474215	5.474781659	5.553455349	5.672257627	5.660391662
TPH1	4.671521376	4.670696999	4.668531973	4.674165658	4.672976353	4.669210836	4.755640931	4.576346741	4.760433352	4.674375544	4.674819923	4.675030326			4.668742746	4.672986662	4.678036016	4.675451203	4.674894505	4.680784654	4.666349345	4.67733381	4.672468385	4.676005019	4.670186661	4.679276406
DCST1	4.830305409	4.754295638	4.751893173	4.902274621	4.832060837	4.827517541	4.755640931	4.831057292	4.835984234	4.758377372	4.758870438	4.834538784			4.826952719	5.023379039	4.838164539	4.759570873	4.903217362	4.910834624	4.95509176	4.837317508	4.96349495	4.8357146	4.82869499	4.763814935
TCP11L2	5.129126928	5.02006822	5.072206902	5.183169958	5.228671091	5.125483784	5.129738602	5.022161454	5.323310776	5.081051734	5.134326058	4.967012072			5.503592782	5.51210479	5.55759732	5.404129882	5.403082047	6.046849157	5.170384704	5.484342289	5.31657482	5.653388047	5.223954398	5.239315252
WDFY4	4.898853994	4.897787478	4.958089577	5.025083574	4.96419236	5.017918872	5.021821388	4.963050343	5.028065533	4.966113228	4.966723249	5.02633355			5.072526028	5.078950039	5.030677827	4.903937406	4.966825629	4.974909316	4.892161979	5.08552719	5.078165685	4.968349985	4.960361946	4.908884374
GPR26	4.671521376	4.670696999	4.668531973	4.674165658	4.672976353	4.669210836	4.671909376	4.67214456	4.760433352	4.674375544	4.674819923	4.675030326			4.668742746	4.672986662	4.678036016	4.675451203	4.674894505	4.680784654	4.666349345	4.67733381	4.672468385	4.676005019	4.670186661	4.679276406
KIAA0825	4.575802893	4.575083476	4.57319416	4.578110585	4.577072651	4.573786562	4.576141497	4.576346741	4.579910968	4.57829376	4.578681588	4.578865217			4.573378088	4.577081647	4.581488511	4.579232538	4.578746679	4.583887599	4.571289567	4.580875628	4.462058523	4.579715888	4.574638121	4.582571142
SESN3	4.830305409	4.754295638	4.751893173	4.75814449	4.832060837	4.752646498	4.755640931	4.755901895	4.676228538	4.674375544	4.758870438	4.759103891			4.668742746	4.756836295	4.762438758	4.759570873	4.834374933	4.841479839	4.824064554	4.837317508	4.96349495	4.8357146	4.75372934	4.763814935
CSNK1G2-AS1	5.021260339	5.075484552	5.016936974	5.08073415	5.078934438	5.073234723	5.021821388	5.022161454	5.083855234	5.025386996	5.081724113	5.02633355			5.124745594	5.131436762	5.030677827	5.135320824	5.277360745	5.090745993	5.068901814	5.188348072	5.130619815	5.136193459	5.127022547	5.088465276
NATD1	5.226211339	5.313399888	5.467038197	5.401709994	5.317485076	5.310735353	5.226867339	5.397904141	5.323310776	5.402105126	5.402941657	5.277597336			5.35146356	5.475800624	5.408993433	5.443039689	5.651008972	5.45329702	5.498788233	5.407672444	5.474781659	5.364818036	5.394215697	5.284990894
KLHL34	4.830305409	4.670696999	4.826698385	4.75814449	4.756824857	4.827517541	4.671909376	4.755901895	4.760433352	4.57829376	4.674819923	4.834538784			4.752127066	4.756836295	4.762438758	4.675451203	4.674894505	4.680784654	4.666349345	4.837317508	4.672468385	4.760185353	4.670186661	4.763814935
ZSCAN10	4.898853994	4.897787478	4.894986292	4.75814449	4.832060837	4.752646498	4.755640931	4.831057292	4.835984234	4.758377372	4.758870438	4.675030326			4.752127066	4.900749543	4.838164539	4.903937406	4.834374933	4.910834624	4.824064554	4.837317508	4.756261215	4.968349985	4.82869499	4.908884374
SAMD3	5.314877587	5.471298024	5.124413185	5.230681282	5.274018851	5.352324918	5.272159431	5.315994494	5.136545634	5.36182334	5.231786974	5.232142525			5.174301141	5.274036814	5.189495458	5.185271371	5.231913008	5.331466187	5.170384704	5.407672444	5.227812396	5.233789464	5.223954398	5.191521938
GOT1L1	4.575802893	4.670696999	4.57319416	4.674165658	4.672976353	4.669210836	4.671909376	4.67214456	4.676228538	4.57829376	4.674819923	4.578865217			4.668742746	4.577081647	4.581488511	4.675451203	4.758953191	4.680784654	4.666349345	4.67733381	4.672468385	4.676005019	4.670186661	4.679276406
LINC02870	4.898853994	4.897787478	4.894986292	4.965825102	4.832060837	4.895864666	4.899355941	4.899660188	4.904942788	4.902546106	4.903120894	4.903393038			4.958379046	4.964206513	4.971137515	4.835046512	4.834374933	4.974909316	4.892161979	4.97017379	4.900079099	4.9046537	4.75372934	4.908884374
ZNF99	4.575802893	4.575083476	4.57319416	4.578110585	4.577072651	4.573786562	4.576141497	4.67214456	4.579910968	4.57829376	4.578681588	4.578865217			4.573378088	4.577081647	4.678036016	4.579232538	4.674894505	4.583887599	4.571289567	4.580875628	4.576629343	4.579715888	4.574638121	4.582571142
CFAP65	4.575802893	4.575083476	4.57319416	4.578110585	4.577072651	4.669210836	4.671909376	4.576346741	4.579910968	4.57829376	4.578681588	4.578865217			4.573378088	4.672986662	4.581488511	4.579232538	4.674894505	4.583887599	4.749471072	4.580875628	4.672468385	4.579715888	4.897127216	4.582571142
SIGLECL1	4.575802893	4.575083476	4.668531973	4.578110585	4.672976353	4.669210836	4.671909376	4.576346741	4.579910968	4.57829376	4.578681588	4.675030326			4.668742746	4.577081647	4.581488511	4.675451203	4.674894505	4.680784654	4.571289567	4.67733381	4.672468385	4.676005019	4.574638121	4.679276406
LDHAL6A	4.962194691	4.961062731	4.958089577	4.902274621	4.900736207	5.017918872	4.962727433	4.963050343	4.968656783	4.966113228	4.966723249	4.834538784			4.895259013	5.023379039	4.971137515	4.9675898	5.081836958	4.974909316	5.120970451	4.97017379	5.02262968	5.027742458	4.960361946	4.908884374
MRGPRX2	5.021260339	4.961062731	5.016936974	4.965825102	4.96419236	5.073234723	4.962727433	5.022161454	4.835984234	5.025386996	4.966723249	5.02633355			5.01724184	5.181242373	5.086589317	5.08267923	5.081836958	5.034649503	4.95509176	5.029663003	5.078165685	4.968349985	5.019330183	4.97283973
NTN5	5.314877587	5.355059147	5.391097239	5.440565417	5.475780357	5.431022032	5.436220996	5.474144933	5.482171416	5.478530615	5.479403892	5.321164816			5.391494528	5.317503549	5.408993433	5.552325511	5.36277721	5.563199189	5.632675277	5.407672444	5.474781659	5.481732331	5.640914226	5.41132636
KLF17	4.830305409	4.897787478	4.826698385	4.833495658	4.900736207	4.827517541	4.830773541	4.899660188	4.835984234	4.902546106	4.903120894	4.834538784			4.958379046	4.900749543	4.907280352	4.9675898	4.903217362	4.910834624	5.013779632	4.837317508	4.900079099	4.9046537	4.82869499	4.839660693
CCDC105	4.898853994	4.961062731	4.894986292	4.833495658	4.900736207	4.895864666	5.021821388	5.022161454	4.760433352	4.966113228	4.834284959	4.834538784			4.958379046	4.832073274	4.907280352	4.903937406	5.026137212	4.765488247	5.013779632	4.906372237	5.227812396	4.968349985	4.897127216	4.839660693
CCDC122	4.671521376	4.575083476	4.668531973	4.674165658	4.672976353	4.669210836	4.671909376	4.67214456	4.676228538	4.674375544	4.674819923	4.759103891			4.668742746	4.577081647	4.678036016	4.675451203	4.674894505	4.680784654	4.749471072	4.67733381	4.672468385	4.676005019	4.670186661	4.763814935
C11orf42	4.830305409	4.754295638	4.826698385	4.75814449	4.832060837	4.752646498	4.830773541	4.755901895	4.760433352	4.833748865	4.758870438	4.759103891			4.895259013	4.900749543	4.838164539	4.835046512	4.758953191	4.841479839	4.824064554	4.837317508	4.831447986	4.760185353	4.75372934	4.763814935
DKFZp434L192	4.671521376	4.575083476	4.668531973	4.674165658	4.672976353	4.669210836	4.671909376	4.67214456	4.760433352	4.57829376	4.674819923	4.578865217			4.668742746	4.672986662	4.581488511	4.675451203	4.578746679	4.765488247	4.571289567	4.580875628	4.576629343	4.676005019	4.670186661	4.679276406
ZNF486	4.671521376	4.754295638	4.668531973	4.75814449	4.672976353	4.752646498	4.671909376	4.67214456	4.760433352	4.674375544	4.674819923	4.675030326			4.752127066	4.756836295	4.762438758	4.759570873	4.758953191	4.680784654	4.666349345	4.761659666	4.831447986	4.760185353	4.574638121	4.763814935
FGD2	9.988847383	9.99829579	10.67600622	10.72522969	10.55362556	10.21209109	10.81233839	10.27463564	10.36117176	10.48619485	10.53863758	10.40013285			10.37200218	10.4458947	10.21145498	10.1889003	9.899320519	9.783321271	10.39443915	9.940452981	9.816486671	10.02753646	10.78041565	10.43607652
EXD1	4.575802893	4.670696999	4.668531973	4.578110585	4.672976353	4.573786562	4.671909376	4.67214456	4.579910968	4.674375544	4.674819923	4.675030326			4.668742746	4.672986662	4.678036016	4.579232538	4.578746679	4.680784654	4.666349345	4.67733381	4.672468385	4.676005019	4.670186661	4.679276406
SLF2	5.271483177	5.395177263	5.429713635	5.617126507	5.438275719	5.539582822	5.436220996	5.612859804	5.444535456	5.478530615	5.441824765	5.551466769			5.266638909	5.438295569	5.522220105	5.586567617	5.44196831	5.414162219	5.347058047	5.520814175	5.437297567	5.444105384	5.269156525	5.524702941
NBPF4	4.575802893	4.670696999	4.668531973	4.578110585	4.756824857	4.752646498	4.671909376	4.67214456	4.676228538	4.674375544	4.758870438	4.675030326			4.752127066	4.672986662	4.678036016	4.759570873	4.758953191	4.680784654	4.749471072	4.67733381	4.756261215	4.760185353	4.574638121	4.582571142
ZNF663P	4.671521376	4.670696999	4.668531973	4.75814449	4.672976353	4.669210836	4.671909376	4.67214456	4.676228538	4.674375544	4.674819923	4.675030326			4.668742746	4.672986662	4.678036016	4.675451203	4.758953191	4.680784654	4.666349345	4.67733381	4.672468385	4.676005019	4.670186661	4.582571142
LINC00955	4.575802893	4.575083476	4.668531973	4.578110585	4.577072651	4.573786562	4.576141497	4.67214456	4.579910968	4.57829376	4.578681588	4.578865217			4.668742746	4.672986662	4.581488511	4.579232538	4.578746679	4.680784654	4.666349345	4.67733381	4.672468385	4.676005019	4.574638121	4.582571142
LOC162137	4.755210397	4.754295638	4.668531973	4.75814449	4.756824857	4.752646498	4.755640931	4.67214456	4.676228538	4.674375544	4.758870438	4.759103891			4.752127066	4.672986662	4.762438758	4.675451203	4.758953191	4.765488247	4.824064554	4.837317508	4.831447986	4.676005019	4.82869499	4.763814935
C10orf126	4.575802893	4.575083476	4.57319416	4.578110585	4.577072651	4.573786562	4.576141497	4.576346741	4.579910968	4.57829376	4.578681588	4.578865217			4.573378088	4.577081647	4.581488511	4.579232538	4.578746679	4.583887599	4.571289567	4.580875628	4.576629343	4.579715888	4.574638121	4.582571142
PIKFYVE	5.129126928	5.177497987	5.221155733	5.183169958	5.317485076	5.125483784	5.315573	5.13010935	5.028065533	5.231035996	5.134326058	5.082042457			5.35146356	5.317503549	5.282831612	5.185271371	5.36277721	5.241861901	5.262464373	5.188348072	5.398514037	5.364818036	5.432902416	5.239315252
LINC00479	4.898853994	4.897787478	4.894986292	4.965825102	4.900736207	4.895864666	5.021821388	4.831057292	4.835984234	4.902546106	4.903120894	4.903393038			5.01724184	4.964206513	5.086589317	4.9675898	4.903217362	4.974909316	5.013779632	5.029663003	5.02262968	4.9046537	4.897127216	4.97283973
C9orf62	4.962194691	4.961062731	4.958089577	5.08073415	4.900736207	4.959021888	5.077319638	4.963050343	4.968656783	5.081051734	5.026029397	4.967012072			5.01724184	5.131436762	5.139393123	5.026941938	5.081836958	4.974909316	5.068901814	5.029663003	5.273133659	4.968349985	5.019330183	4.97283973
SHOC1	4.671521376	4.829310755	4.751893173	4.833495658	4.756824857	4.827517541	4.755640931	4.831057292	4.760433352	4.674375544	4.758870438	4.834538784			4.752127066	4.832073274	4.762438758	4.675451203	4.834374933	5.143722048	4.892161979	4.837317508	4.831447986	4.760185353	5.269156525	4.97283973
SLC22A24	4.755210397	4.754295638	4.751893173	4.75814449	4.832060837	4.827517541	4.830773541	4.755901895	4.760433352	4.833748865	4.834284959	4.759103891			4.826952719	4.900749543	4.907280352	4.835046512	4.758953191	4.841479839	4.95509176	4.837317508	5.130619815	4.8357146	5.019330183	4.679276406
FMO9P	4.575802893	4.670696999	4.668531973	4.578110585	4.577072651	4.573786562	4.576141497	4.576346741	4.579910968	4.57829376	4.674819923	4.675030326			4.573378088	4.672986662	4.678036016	4.579232538	4.674894505	4.680784654	4.571289567	4.580875628	4.672468385	4.760185353	4.670186661	4.582571142
C7orf33	4.755210397	4.829310755	4.751893173	4.75814449	4.756824857	4.827517541	4.755640931	4.755901895	4.760433352	4.758377372	4.758870438	4.759103891			4.752127066	4.832073274	4.838164539	4.759570873	4.758953191	4.680784654	4.749471072	4.761659666	4.756261215	4.760185353	4.670186661	4.679276406
ELMOD2	5.578406099	5.471298024	5.391097239	5.276091045	5.359251073	5.267455142	5.397461167	5.315994494	5.5539113	5.584334578	5.618507166	5.516200433			5.309895962	5.359270028	5.282831612	5.135320824	5.36277721	5.563199189	5.347058047	5.367259387	5.358317046	5.553455349	5.575632073	5.810901893
ACER1	5.129126928	5.177497987	5.124413185	5.133294986	5.131420513	5.125483784	5.179480794	5.07767559	5.083855234	5.081051734	5.134326058	4.967012072			5.072526028	5.181242373	5.086589317	5.27833044	5.134443588	5.143722048	5.217463012	5.13828695	5.227812396	5.136193459	4.960361946	5.239315252
TAAR1	4.575802893	4.575083476	4.57319416	4.578110585	4.577072651	4.573786562	4.576141497	4.67214456	4.579910968	4.57829376	4.578681588	4.578865217			4.573378088	4.672986662	4.581488511	4.579232538	4.578746679	4.583887599	4.571289567	4.580875628	4.576629343	4.579715888	4.574638121	4.582571142
OSTCP1	4.671521376	4.670696999	4.668531973	4.578110585	4.672976353	4.669210836	4.671909376	4.67214456	4.676228538	4.674375544	4.674819923	4.578865217			4.668742746	4.756836295	4.678036016	4.675451203	4.674894505	4.680784654	4.571289567	4.580875628	4.831447986	4.676005019	4.670186661	4.582571142
LINC00305	4.575802893	4.575083476	4.668531973	4.674165658	4.577072651	4.669210836	4.576141497	4.67214456	4.579910968	4.674375544	4.674819923	4.675030326			4.573378088	4.672986662	4.678036016	4.675451203	4.674894505	4.680784654	4.666349345	4.580875628	4.672468385	4.676005019	4.670186661	4.582571142
BFSP2-AS1	4.755210397	4.754295638	4.668531973	4.75814449	4.672976353	4.669210836	4.755640931	4.67214456	4.676228538	4.674375544	4.674819923	4.834538784			4.668742746	4.672986662	4.678036016	4.675451203	4.758953191	4.765488247	4.749471072	4.761659666	4.756261215	4.676005019	4.75372934	4.763814935
STK32A	4.575802893	4.670696999	4.57319416	4.75814449	4.577072651	4.669210836	4.671909376	4.576346741	4.579910968	4.674375544	4.578681588	4.578865217			4.668742746	4.577081647	4.678036016	4.579232538	4.674894505	4.583887599	4.666349345	4.580875628	4.672468385	4.676005019	4.574638121	4.582571142
LRRC28	5.544303408	5.54261949	5.309517974	5.514467843	5.399470662	5.431022032	5.357289055	5.397904141	5.62147878	5.617569446	5.441824765	5.516200433			5.430119888	5.399490075	5.48572119	5.443039689	5.403082047	5.331466187	5.217463012	5.325289854	5.273133659	5.587717059	5.470294105	5.370827271
LOC171391	5.271483177	5.395177263	5.351075678	5.230681282	5.438275719	5.267455142	5.397461167	5.272569315	5.405592794	5.440969431	5.32078794	5.184583429			5.503592782	5.475800624	5.282831612	5.404129882	5.36277721	5.373596428	5.217463012	5.281608998	5.645808616	5.405172167	5.269156525	5.284990894
GPHB5	5.021260339	5.127827214	5.173956297	5.025083574	5.078934438	5.073234723	5.129738602	5.022161454	5.028065533	5.081051734	5.026029397	4.967012072			5.124745594	5.131436762	5.086589317	5.185271371	5.184361414	5.193985542	5.217463012	5.08552719	5.227812396	5.083517091	5.019330183	5.03247027
DCD	4.830305409	4.829310755	4.826698385	4.75814449	4.832060837	4.827517541	4.755640931	4.831057292	4.904942788	4.833748865	4.834284959	4.759103891			4.895259013	4.900749543	4.971137515	4.903937406	4.834374933	4.910834624	4.824064554	4.97017379	4.900079099	4.8357146	4.82869499	4.908884374
EXOSC6	6.475469966	6.404769679	6.345141007	6.396823444	6.375598636	6.272102913	6.279425095	6.179828474	6.271610099	6.07700285	6.207571398	6.326035119			6.399274444	6.223079328	6.334251523	6.308238935	6.228158023	6.223321412	6.122433197	6.332333192	6.31902089	6.103642086	6.403335252	6.239803548
IQSEC3	4.898853994	5.075484552	4.894986292	5.08073415	5.023364134	5.125483784	5.129738602	4.899660188	4.904942788	5.025386996	5.026029397	5.02633355			5.072526028	5.131436762	4.971137515	5.026941938	4.903217362	5.090745993	5.068901814	5.13828695	5.18039492	5.083517091	5.019330183	4.908884374
ZDHHC19	5.435473681	5.313399888	5.351075678	5.183169958	5.359251073	5.310735353	5.226867339	5.397904141	5.234167106	5.276456696	5.231786974	5.363026837			5.35146356	5.359270028	5.368549262	5.27833044	5.231913008	5.45329702	5.262464373	5.325289854	5.273133659	5.364818036	5.269156525	5.370827271
ALG14	5.675163238	5.703930746	5.728895689	5.617126507	5.64689776	5.468374146	5.509944966	5.545576107	5.62147878	5.649896911	5.515778871	5.516200433			5.605672533	5.51210479	5.522220105	5.586567617	5.551189623	5.491116316	5.217463012	5.325289854	5.398514037	5.684914848	5.608724085	5.594503102
PPP1R21	8.094484576	7.970341669	7.97400225	8.109325058	8.045910691	8.054080006	7.951508563	8.031901801	8.163429559	8.06731758	8.122184813	8.091220808			7.849814707	7.839767846	8.058578596	8.010201478	7.890217291	8.057324769	7.641579584	8.028222227	7.905978151	8.073179766	7.979955178	8.122460524
TMEM237	4.898853994	4.897787478	4.894986292	4.833495658	4.832060837	4.959021888	4.755640931	4.831057292	4.835984234	4.902546106	4.903120894	4.903393038			4.958379046	4.832073274	4.838164539	4.903937406	4.903217362	4.910834624	4.892161979	4.837317508	4.96349495	4.8357146	5.074712018	4.908884374
ZNF564	6.219175292	6.155050656	6.016231193	6.142749844	6.027356679	6.086250589	6.115211934	6.31813359	6.329312219	6.361323873	6.267819485	6.582251823			6.128662562	5.824356473	5.863410027	5.857363544	5.882763593	5.948723805	6.010759339	6.172385825	6.072159043	6.189977453	5.897652036	6.337638267
B3GALT6	7.330914217	7.225310343	7.382597144	7.197345027	7.380211518	7.341084027	7.097165003	7.210542597	7.281897008	7.237435704	7.267751908	7.315270591			7.179555926	6.954700304	7.189834455	7.201550298	7.248827217	6.918503039	7.277100652	7.071255033	7.191786011	6.928191374	7.271289877	7.233922258
SNX21	4.830305409	4.897787478	5.016936974	5.183169958	5.078934438	4.752646498	4.899355941	5.022161454	5.083855234	4.966113228	5.134326058	5.02633355			4.958379046	5.078950039	5.030677827	5.135320824	4.674894505	4.841479839	4.824064554	4.97017379	4.831447986	4.968349985	4.960361946	5.03247027
RHOB	5.226211339	5.075484552	5.072206902	5.276091045	5.023364134	5.125483784	5.129738602	5.13010935	5.136545634	5.133625759	5.184239499	5.277597336			5.266638909	5.228688517	5.139393123	5.08267923	5.403082047	5.241861901	5.120970451	5.407672444	5.18039492	5.553455349	5.269156525	5.41132636
CEL	4.755210397	4.754295638	4.751893173	4.674165658	4.672976353	4.669210836	4.755640931	4.67214456	4.676228538	4.674375544	4.758870438	4.675030326			4.752127066	4.756836295	4.838164539	4.759570873	4.758953191	4.765488247	4.749471072	4.761659666	4.831447986	4.8357146	4.670186661	4.679276406
CASTOR3	6.353426432	6.256708131	5.757932629	6.053605434	6.139663558	6.172102548	6.070738453	6.001615097	6.21129524	6.007147555	5.882587162	6.187416901			6.107038552	5.929925829	6.13098991	6.209240596	6.468285423	6.263979012	6.22531573	6.193466193	6.392082828	6.309745581	6.33137452	5.995026023
CBS	4.830305409	4.897787478	4.826698385	4.902274621	4.832060837	4.895864666	4.962727433	4.831057292	4.835984234	4.833748865	4.903120894	5.02633355			4.895259013	5.023379039	4.907280352	5.026941938	5.081836958	4.910834624	4.95509176	4.97017379	5.273133659	4.9046537	4.897127216	5.03247027
SPINK6	4.755210397	4.897787478	4.826698385	4.833495658	4.900736207	4.895864666	4.755640931	4.899660188	4.835984234	4.758377372	4.903120894	4.759103891			4.958379046	4.832073274	4.838164539	4.903937406	4.903217362	4.910834624	4.892161979	4.906372237	4.831447986	4.760185353	4.82869499	4.839660693
C22orf39	6.961850612	6.947475121	6.764753064	6.885509375	6.918713951	6.88245905	7.020512457	6.998568248	7.111104242	6.848223934	6.899966175	6.900621459			7.010388921	6.764871588	6.897525507	6.95056481	6.862590499	6.930857676	6.703510348	6.857345536	6.679473373	6.55357569	6.885510083	6.998029138
DPCD	5.226211339	5.127827214	5.467038197	5.183169958	5.228671091	5.073234723	5.272159431	5.272569315	5.234167106	5.183513073	5.32078794	5.082042457			5.309895962	5.131436762	5.237220415	5.27833044	5.231913008	5.090745993	5.262464373	5.188348072	4.900079099	5.233789464	5.432902416	5.328767218
CYP39A1	4.898853994	4.961062731	4.958089577	4.902274621	4.96419236	5.125483784	5.021821388	5.022161454	4.904942788	4.966113228	5.081724113	4.834538784			5.174301141	4.964206513	4.971137515	4.903937406	5.134443588	5.090745993	5.120970451	4.97017379	5.078165685	4.968349985	5.019330183	5.088465276
BORCS8	6.662169765	6.569588909	6.515934279	6.564078167	6.544798815	6.233003382	6.372631066	6.493828755	6.585747008	6.670678848	6.550143369	6.582251823			6.609605895	6.791729218	6.859507841	6.598966024	6.757030302	6.774842332	6.443950877	6.649967114	6.763294341	6.866023907	6.860618504	6.824211903
ZNF121	8.544235175	8.133132633	8.145610766	8.125038053	8.141412174	8.26920725	8.293004079	8.325744114	8.423937237	8.255222639	8.317435221	8.295202733			7.671236194	7.456875895	7.73159779	7.87361786	7.567291413	7.579691751	7.46696241	7.65811387	7.684244029	7.69654926	7.543389935	7.899543307
RAB7B	4.830305409	4.829310755	4.894986292	4.833495658	4.832060837	4.827517541	4.899355941	4.831057292	4.760433352	4.758377372	4.903120894	4.759103891			4.895259013	4.900749543	4.971137515	4.835046512	4.834374933	4.974909316	4.824064554	4.837317508	5.02262968	4.8357146	4.897127216	4.839660693
DTYMK	5.356575472	5.355059147	5.391097239	5.478118123	5.547274504	5.392376773	5.397461167	5.436673943	5.518600723	5.440969431	5.402941657	5.442229714			5.35146356	5.51210479	5.448012409	5.552325511	5.36277721	5.527720859	5.262464373	5.367259387	5.227812396	5.444105384	5.269156525	5.41132636
MAPKAPK5-AS1	7.944266245	7.952996984	7.855267738	7.881471658	7.907786439	7.965003475	7.921993068	8.091448347	8.001606729	7.739468394	7.727306469	7.82783894			7.934312405	7.788155855	7.990814322	7.987364523	7.741282338	7.662700167	7.724842226	7.65811387	7.487883342	7.638886181	7.751791183	7.714949734
BRICD5	5.675163238	5.433885652	5.728895689	5.711583456	5.708960548	5.842741071	5.612363146	5.766116955	5.62147878	5.617569446	5.618507166	5.651299987			5.669112897	5.581450289	5.55759732	5.619839068	5.551189623	5.597629627	5.752982825	5.556165515	5.645808616	5.653388047	5.672257627	5.56012582
NBR2	5.874778949	6.090059614	5.699149716	5.90717009	6.202693618	5.994331672	5.952369224	5.902337387	6.104213286	5.907671727	6.055253575	5.651299987			6.016759318	6.182044016	6.016213107	5.910241939	6.100803272	5.814347965	5.72400799	5.520814175	5.707839955	5.745602971	6.066358242	5.893120274
NT5E	5.021260339	4.897787478	5.072206902	5.025083574	4.900736207	4.895864666	5.179480794	4.963050343	4.835984234	5.081051734	4.834284959	4.834538784			4.826952719	4.900749543	4.971137515	4.903937406	4.903217362	5.034649503	4.892161979	4.837317508	4.831447986	5.027742458	4.960361946	4.908884374
ASPHD1	5.472919445	5.433885652	5.503169792	5.583898782	5.475780357	5.431022032	5.676007664	5.474144933	5.405592794	5.478530615	5.479403892	5.516200433			5.605672533	5.475800624	5.55759732	5.51704363	5.651008972	5.597629627	5.632675277	5.590474215	5.677224081	5.587717059	5.506489885	5.328767218
TRIM37	5.271483177	5.270046201	5.266271351	5.361437534	5.228671091	5.310735353	5.272159431	5.272569315	5.323310776	5.276456696	5.32078794	5.442229714			5.174301141	5.181242373	5.448012409	5.27833044	5.403082047	5.241861901	5.262464373	5.188348072	5.130619815	5.136193459	5.223954398	5.191521938
ARHGEF28	5.021260339	5.177497987	4.958089577	5.025083574	5.078934438	5.310735353	5.021821388	5.07767559	4.968656783	5.081051734	5.026029397	5.02633355			5.072526028	5.181242373	5.030677827	5.026941938	5.081836958	4.974909316	5.170384704	5.188348072	5.227812396	4.9046537	5.127022547	4.839660693
LLGL2	5.735584141	5.898873658	5.637362702	5.741494725	5.767999907	5.920801938	5.676007664	5.736977583	6.058800298	5.907671727	5.71302594	5.743426299			5.503592782	5.581450289	5.625290019	5.830064383	5.800879291	5.631081863	5.663897072	5.806460621	5.546237355	5.715637972	5.79009334	5.692021059
OSMR	4.671521376	4.754295638	4.751893173	4.75814449	4.756824857	4.827517541	4.755640931	4.755901895	4.676228538	4.674375544	4.674819923	4.675030326			4.668742746	4.672986662	4.762438758	4.675451203	4.758953191	4.680784654	4.95509176	4.906372237	4.831447986	4.8357146	4.75372934	4.679276406
NDST1	5.396730309	5.64200922	5.814025993	5.770691209	5.614616095	5.539582822	5.706606546	5.397904141	5.444535456	5.440969431	5.742956335	5.682796148			6.016759318	5.929925829	5.65773698	5.884080349	5.934530519	5.869833136	5.632675277	5.777854965	6.002418466	5.858659557	5.972692125	5.866309455
RSPO2	4.671521376	4.670696999	4.57319416	4.578110585	4.577072651	4.669210836	4.576141497	4.576346741	4.579910968	4.57829376	4.674819923	4.578865217			4.573378088	4.577081647	4.581488511	4.579232538	4.578746679	4.583887599	4.571289567	4.580875628	4.576629343	4.676005019	4.574638121	4.582571142
CHD2	7.443590958	7.19591272	7.356482444	7.384207666	7.271137712	7.305034896	7.189953387	7.170624085	7.373498516	7.157496264	7.117196153	7.369488884			7.391909959	7.497726767	7.315994734	7.530106709	7.412681554	7.662700167	7.171679051	7.377193411	7.088271107	7.399112789	6.992336944	7.551056749
USB1	6.278372961	6.351143	6.308224034	6.226218423	6.320412428	6.291230383	6.199868462	6.220836038	6.366444208	6.379487424	6.325459443	6.326035119			6.308802746	6.445860183	6.352971141	6.345869864	6.380928984	6.583293739	6.409892316	6.508691129	6.374186059	6.675529427	6.568095258	6.578922309
GPNMB	4.671521376	4.575083476	4.57319416	4.674165658	4.577072651	4.573786562	4.576141497	4.576346741	4.579910968	4.57829376	4.578681588	4.578865217			4.573378088	4.577081647	4.581488511	4.579232538	4.578746679	4.583887599	4.571289567	4.580875628	4.576629343	4.579715888	4.574638121	4.679276406
CEP57L1	4.755210397	4.670696999	4.668531973	4.674165658	4.756824857	4.752646498	4.755640931	4.755901895	4.676228538	4.674375544	4.674819923	4.759103891			4.668742746	4.672986662	4.762438758	4.759570873	4.758953191	4.680784654	4.666349345	4.67733381	4.756261215	4.760185353	4.82869499	4.908884374
BICD1	5.705750319	5.270046201	5.173956297	5.08073415	5.078934438	5.175066943	5.226867339	5.272569315	5.186541852	5.231035996	5.184239499	5.232142525			5.309895962	5.131436762	5.237220415	5.232853712	5.134443588	5.193985542	5.013779632	5.188348072	5.273133659	5.279295022	5.223954398	5.03247027
ZNF12	6.746796602	6.659709007	6.638644923	6.532231009	6.709510752	6.640667936	6.747974987	6.815487018	6.866714626	6.713718191	6.597117496	6.937245232			6.381660369	6.737483197	6.637036268	6.731012859	6.672224258	6.397260316	6.244964487	6.492052978	6.300116343	6.488267111	6.293893915	6.699792597
MYO10	4.671521376	4.754295638	4.826698385	4.674165658	4.832060837	4.752646498	4.830773541	4.755901895	4.760433352	4.758377372	4.758870438	4.759103891			4.895259013	4.964206513	4.762438758	4.903937406	4.834374933	4.765488247	4.824064554	4.906372237	4.96349495	4.9046537	4.670186661	4.763814935
SLC4A4	4.671521376	4.670696999	4.668531973	4.75814449	4.756824857	4.669210836	4.755640931	4.755901895	4.676228538	4.674375544	4.758870438	4.675030326			4.668742746	4.672986662	4.762438758	4.759570873	4.674894505	4.765488247	4.824064554	4.67733381	4.672468385	4.676005019	4.670186661	4.679276406
TTC37	5.793153127	5.898873658	5.668653729	5.854354113	5.904326788	5.994331672	5.849068614	5.902337387	5.885918494	6.054134205	5.984087218	6.078664874			5.605672533	5.51210479	5.65773698	6.079732911	5.713190354	5.785648807	5.305602893	5.656233669	5.437297567	5.684914848	5.732598711	5.945092732
ARSB	5.021260339	4.961062731	5.072206902	5.133294986	5.023364134	5.017918872	4.962727433	5.07767559	4.968656783	4.966113228	5.026029397	4.903393038			4.958379046	5.023379039	4.907280352	5.08267923	5.026137212	4.910834624	4.95509176	4.97017379	5.02262968	4.968349985	4.82869499	5.03247027
FRMD4A	4.671521376	4.670696999	4.668531973	4.674165658	4.672976353	4.669210836	4.671909376	4.67214456	4.676228538	4.674375544	4.674819923	4.675030326			4.668742746	4.672986662	4.678036016	4.675451203	4.674894505	4.680784654	4.666349345	4.67733381	4.672468385	4.676005019	4.670186661	4.679276406
ZBTB24	7.266314487	7.473723669	7.117790338	7.452558633	7.521650228	6.857581525	6.997820244	6.789152493	7.000023482	6.835344753	6.924485503	6.771085347			8.036101307	8.018249817	7.955690737	8.054811403	7.775005812	7.397566576	7.575777825	7.49629799	7.077488326	7.327694911	7.154070281	7.291953308
LARP1B	5.226211339	5.075484552	5.124413185	5.230681282	5.131420513	5.073234723	5.315573	5.22726495	5.279684298	5.133625759	5.277230825	5.184583429			5.309895962	5.181242373	5.282831612	5.232853712	5.184361414	5.241861901	5.262464373	5.281608998	5.078165685	5.279295022	5.432902416	5.239315252
DGLUCY	5.848159234	5.846226641	5.814025993	5.649447106	5.929900938	5.895315453	5.706606546	5.707125488	5.5539113	5.854845552	5.742956335	5.682796148			5.993168695	6.095922739	6.216069575	6.124338924	6.228158023	6.379011042	5.836024278	5.990260354	6.31902089	6.034925516	5.948167464	6.279802187
TMEM239	4.755210397	4.754295638	4.826698385	4.674165658	4.756824857	4.752646498	4.671909376	4.755901895	4.760433352	4.758377372	4.758870438	4.759103891			4.826952719	4.672986662	4.678036016	4.759570873	4.758953191	4.765488247	4.666349345	4.761659666	4.756261215	4.760185353	4.670186661	4.763814935
MRAP	4.671521376	4.754295638	4.751893173	4.75814449	4.832060837	4.827517541	4.755640931	4.755901895	4.760433352	4.833748865	4.758870438	4.834538784			4.752127066	4.832073274	4.907280352	4.759570873	4.834374933	4.910834624	4.824064554	4.761659666	4.831447986	4.8357146	4.82869499	4.763814935
ZNF24	5.314877587	5.471298024	5.309517974	5.319615918	5.274018851	5.175066943	5.021821388	5.272569315	5.323310776	5.478530615	5.231786974	4.967012072			5.538626124	5.646919862	5.625290019	5.321918649	5.585412013	5.695294815	5.425505584	5.484342289	5.398514037	5.553455349	5.394215697	5.370827271
TXNDC9	4.898853994	4.829310755	4.668531973	4.902274621	4.756824857	4.752646498	4.755640931	4.755901895	4.760433352	4.758377372	4.834284959	4.759103891			4.752127066	4.756836295	4.762438758	4.675451203	4.758953191	4.765488247	4.666349345	4.761659666	4.756261215	4.760185353	4.82869499	4.763814935
DCAF8	5.578406099	5.270046201	5.124413185	5.319615918	5.438275719	5.392376773	5.473682467	5.474144933	5.323310776	5.440969431	5.362640132	5.516200433			5.35146356	5.359270028	5.368549262	5.363800328	5.36277721	5.241861901	5.305602893	5.281608998	5.437297567	5.444105384	5.432902416	5.370827271
SMPDL3B	5.435473681	5.54261949	5.429713635	5.440565417	5.475780357	5.468374146	5.315573	5.474144933	5.323310776	5.402105126	5.441824765	5.442229714			5.538626124	5.547295551	5.48572119	5.443039689	5.515928306	5.527720859	5.632675277	5.520814175	5.737701541	5.553455349	5.432902416	5.239315252
CNOT1	5.021260339	5.075484552	5.124413185	5.133294986	5.131420513	5.175066943	5.129738602	4.899660188	4.968656783	5.025386996	5.134326058	5.02633355			5.124745594	5.078950039	5.237220415	5.135320824	5.184361414	5.090745993	5.120970451	5.08552719	5.18039492	5.186176547	5.074712018	5.191521938
SPTLC1	5.314877587	5.313399888	5.124413185	5.183169958	5.317485076	5.125483784	5.077319638	5.13010935	5.365228746	5.081051734	5.134326058	5.184583429			5.266638909	5.274036814	5.189495458	5.27833044	5.231913008	5.287615833	5.305602893	5.188348072	5.273133659	5.322910499	5.127022547	5.328767218
ASH1L-AS1	6.572000645	6.911567006	6.653239891	7.016396515	6.966449891	7.230058829	6.96307761	6.998568248	7.000023482	6.947185501	6.700851805	7.052832995			7.179555926	6.918746247	7.084481512	7.171242527	7.169430177	6.955244079	6.771377643	7.015037886	6.829468079	6.704400661	6.897791189	7.00965548
SETMAR	5.129126928	4.961062731	5.173956297	5.08073415	5.131420513	5.22230402	5.129738602	5.07767559	4.968656783	5.133625759	5.134326058	5.082042457			5.124745594	5.181242373	5.237220415	5.135320824	5.134443588	5.241861901	5.217463012	5.188348072	5.31657482	5.279295022	5.074712018	5.088465276
XG	4.671521376	4.670696999	4.668531973	4.75814449	4.577072651	4.669210836	4.755640931	4.67214456	4.579910968	4.674375544	4.674819923	4.675030326			4.668742746	4.672986662	4.581488511	4.675451203	4.674894505	4.680784654	4.749471072	4.761659666	4.756261215	4.760185353	4.670186661	4.582571142
ZHX1-C8orf76	5.735584141	5.846226641	5.757932629	5.770691209	5.929900938	5.730415168	5.901774776	5.645114208	5.859182544	5.771166046	5.650849164	5.909236417			6.0626842	6.07347579	5.967287516	6.056843346	6.078320164	5.756266266	5.888458397	6.038242996	5.928674311	6.011184936	5.79009334	5.919372936
MVB12B	5.226211339	5.177497987	5.124413185	5.133294986	5.181225517	5.22230402	5.077319638	5.07767559	5.083855234	5.183513073	5.134326058	5.082042457			5.174301141	5.131436762	5.139393123	5.08267923	5.231913008	5.241861901	5.170384704	5.188348072	5.273133659	5.186176547	5.127022547	5.03247027
C12orf66	6.297534729	6.155050656	5.867693757	6.006627306	6.027356679	5.994331672	6.354500778	6.093767116	6.271610099	6.266623055	5.984087218	6.03249082			5.786781544	5.796510534	6.016213107	5.830064383	5.68250086	5.842398698	5.462741452	5.888531134	5.707839955	5.885390003	5.354120326	5.660391662
EPHA8	4.898853994	4.897787478	4.894986292	4.902274621	4.96419236	5.017918872	5.021821388	4.899660188	4.968656783	4.902546106	4.834284959	4.903393038			4.895259013	5.023379039	4.907280352	4.9675898	4.966825629	4.974909316	5.013779632	4.97017379	5.130619815	4.968349985	4.897127216	4.839660693
DEUP1	4.575802893	4.575083476	4.57319416	4.578110585	4.577072651	4.573786562	4.576141497	4.576346741	4.579910968	4.674375544	4.578681588	4.578865217			4.573378088	4.672986662	4.581488511	4.579232538	4.578746679	4.680784654	4.571289567	4.67733381	4.576629343	4.579715888	4.574638121	4.582571142
TLCD5	4.898853994	4.961062731	5.016936974	5.025083574	4.96419236	4.959021888	4.962727433	4.899660188	5.028065533	5.025386996	5.134326058	4.903393038			5.124745594	5.023379039	5.086589317	4.9675898	4.966825629	5.034649503	5.120970451	5.13828695	5.18039492	4.968349985	5.019330183	4.839660693
TMEM53	5.509166926	5.313399888	5.467038197	5.440565417	5.614616095	5.310735353	5.397461167	5.397904141	5.588180918	5.440969431	5.515778871	5.403337706			5.538626124	5.61463786	5.48572119	5.480644295	5.44196831	5.563199189	5.305602893	5.484342289	5.707839955	5.405172167	5.506489885	5.56012582
DNAJA3	8.083881581	8.070217477	7.951030336	7.953712946	7.94358666	8.026833919	7.897934406	8.193758389	7.990140061	7.966155952	7.833508873	7.950912184			7.606373497	7.513744011	7.73159779	7.987364523	7.62026873	7.587441001	7.890139305	7.613725746	7.589444927	7.738316922	7.711100875	7.721969976
GALNT18	4.898853994	5.02006822	5.016936974	4.833495658	4.900736207	4.959021888	4.899355941	4.831057292	4.904942788	4.966113228	4.966723249	4.903393038			5.01724184	4.964206513	4.838164539	4.903937406	4.966825629	4.910834624	4.95509176	4.97017379	4.900079099	4.968349985	4.897127216	4.97283973
NOL9	6.23920237	6.216977549	6.190915493	6.121027989	6.095896356	6.063875526	6.001031565	6.001615097	6.348006529	6.030854631	5.934350579	6.123255178			5.969136281	6.027382459	6.039995332	6.249728378	5.984270459	5.973967849	5.862515434	6.061581638	5.928674311	6.011184936	5.996755356	6.019281744
DDX51	5.975977077	6.021653618	5.944128742	5.982479495	5.929900938	5.869303464	5.849068614	5.927892212	5.987547058	5.881535833	5.800708563	5.934858193			5.758410422	5.76802324	5.942104818	5.884080349	5.713190354	5.814347965	5.808958171	5.777854965	5.580373693	5.653388047	5.817865245	5.782243552
TUBGCP3	5.509166926	5.313399888	5.728895689	5.440565417	5.274018851	5.468374146	5.509944966	5.397904141	5.444535456	5.440969431	5.441824765	5.363026837			5.605672533	5.61463786	5.408993433	5.404129882	5.551189623	5.563199189	5.498788233	5.446661785	5.580373693	5.885390003	5.31248499	5.524702941
SNAPC5	7.178669515	7.124837584	7.1384434	6.970205543	7.121778767	6.977759116	6.747974987	7.009961704	6.87937337	7.157496264	6.99556423	7.041693706			7.032682276	6.818077001	6.738791605	6.83865567	6.91251247	6.802090416	7.024985337	6.956472584	6.964844756	6.760394176	7.112727499	7.152641662
ENTPD5	5.129126928	5.270046201	5.173956297	5.361437534	5.317485076	5.175066943	5.179480794	5.272569315	5.136545634	5.319991913	5.081724113	5.277597336			5.309895962	5.131436762	5.139393123	5.363800328	5.081836958	5.193985542	5.217463012	5.236034308	5.18039492	5.233789464	5.223954398	5.088465276
RBM33	5.356575472	5.395177263	5.309517974	5.401709994	5.317485076	5.267455142	5.226867339	5.22726495	5.279684298	5.36182334	5.362640132	5.403337706			5.266638909	5.581450289	5.326546993	5.27833044	5.551189623	5.527720859	5.217463012	5.407672444	5.398514037	5.518153022	5.506489885	5.627904316
MIR31HG	5.129126928	5.177497987	5.124413185	5.133294986	5.131420513	5.267455142	5.226867339	5.13010935	5.136545634	5.081051734	5.134326058	5.134657618			5.174301141	5.131436762	5.139393123	5.026941938	5.081836958	5.143722048	5.170384704	5.08552719	5.227812396	4.968349985	5.223954398	5.03247027
SPIN3	4.671521376	4.670696999	4.751893173	4.75814449	4.672976353	4.669210836	4.671909376	4.755901895	4.760433352	4.674375544	4.674819923	4.675030326			4.668742746	4.672986662	4.678036016	4.675451203	4.674894505	4.680784654	4.666349345	4.67733381	4.672468385	4.676005019	4.670186661	4.679276406
TMTC4	4.962194691	5.127827214	4.751893173	4.902274621	5.274018851	4.959021888	4.899355941	4.963050343	5.083855234	4.758377372	5.081724113	5.184583429			4.958379046	4.964206513	4.762438758	5.026941938	5.081836958	4.841479839	4.892161979	5.08552719	4.756261215	4.8357146	5.019330183	5.141346844
TMEM185A	6.135885392	6.133743518	6.170313134	6.205840851	6.161010743	6.213013132	6.240242599	6.260612133	6.231706225	6.226777044	6.207571398	6.144992553			6.128662562	6.262881846	6.174216609	6.249728378	6.122905396	6.223321412	6.056588734	5.914737605	5.850378559	6.011184936	6.293893915	6.239803548
NBEAL1	5.764705875	5.733740373	5.572191568	5.711583456	5.796486919	5.945786036	5.736451746	5.736977583	5.859182544	5.741963639	5.772171276	5.743426299			5.605672533	5.475800624	5.720112039	5.744366285	5.772339972	5.695294815	5.425505584	5.718565495	5.511065785	5.684914848	5.672257627	5.810901893
CDCP1	4.755210397	4.754295638	4.826698385	4.902274621	4.756824857	4.827517541	4.830773541	4.755901895	4.760433352	4.833748865	4.758870438	4.759103891			4.826952719	4.832073274	4.762438758	4.835046512	4.758953191	4.765488247	4.749471072	4.837317508	4.831447986	4.8357146	4.82869499	4.839660693
ULK2	5.509166926	5.673368755	5.309517974	5.583898782	5.581428876	5.267455142	5.397461167	5.272569315	5.365228746	5.36182334	5.402941657	5.551466769			5.605672533	5.67835167	5.237220415	5.321918649	5.320921533	5.287615833	5.305602893	5.325289854	5.398514037	5.481732331	5.640914226	5.450397638
SLC4A8	4.898853994	4.754295638	5.016936974	4.902274621	4.900736207	4.959021888	4.899355941	4.831057292	4.835984234	4.833748865	5.081724113	4.903393038			4.958379046	5.023379039	4.907280352	4.9675898	5.026137212	4.910834624	5.013779632	5.029663003	5.273133659	5.027742458	4.897127216	4.908884374
SSH2	6.11421114	6.256708131	6.345141007	6.483021486	6.528795482	6.252696868	5.927324133	6.071336163	6.251807871	6.32424337	6.144446914	6.166375696			7.043697518	7.414815513	7.473976393	7.020484167	7.840154732	7.848056712	6.5255352	7.247159596	6.693801425	7.555586495	6.873119862	7.5976562
C5orf58	5.226211339	5.177497987	5.124413185	5.230681282	5.131420513	5.073234723	5.226867339	5.17986539	5.083855234	5.183513073	5.184239499	5.184583429			5.124745594	5.181242373	5.139393123	5.135320824	5.277360745	5.287615833	5.217463012	5.325289854	5.398514037	5.186176547	5.223954398	5.284990894
PARP11	6.157207032	6.295286323	6.170313134	6.226218423	6.393502113	6.328682963	6.240242599	6.426266437	6.231706225	6.305311315	6.287310509	6.287880062			5.637815193	5.851592803	6.063347956	6.056843346	5.959642808	5.998723366	5.888458397	6.038242996	5.90311196	6.12576465	5.871616569	6.374854555
CCDC60	5.271483177	5.313399888	5.391097239	5.230681282	5.228671091	5.22230402	5.315573	5.315994494	5.279684298	5.276456696	5.277230825	5.184583429			5.430119888	5.399490075	5.326546993	5.27833044	5.44196831	5.45329702	5.386982099	5.325289854	5.546237355	5.186176547	5.223954398	5.191521938
HSD17B12	4.575802893	4.670696999	4.668531973	4.674165658	4.672976353	4.752646498	4.671909376	4.67214456	4.676228538	4.758377372	4.674819923	4.675030326			4.668742746	4.672986662	4.581488511	4.675451203	4.578746679	4.680784654	4.666349345	4.67733381	4.576629343	4.760185353	4.670186661	4.763814935
NLGN4Y	4.575802893	4.575083476	4.57319416	4.578110585	4.577072651	4.669210836	4.671909376	4.576346741	4.676228538	4.674375544	4.578681588	4.675030326			4.668742746	4.577081647	4.581488511	4.579232538	4.674894505	4.583887599	4.666349345	4.67733381	4.672468385	4.676005019	4.75372934	4.679276406
MSRB3	6.278372961	6.422181708	6.515934279	6.483021486	6.393502113	6.501750108	6.588584941	6.373285337	6.38463265	6.432554941	6.468073577	6.123255178			6.51654503	6.411200023	6.256639854	6.400410952	6.550359453	6.397260316	6.509604968	6.619806474	6.52732734	6.488267111	6.729002433	6.239803548
ADIG	5.544303408	5.54261949	5.538195299	5.361437534	5.614616095	5.573603287	5.676007664	5.357721561	5.365228746	5.440969431	5.402941657	5.403337706			5.538626124	5.547295551	5.55759732	5.552325511	5.800879291	5.631081863	5.808958171	5.484342289	5.707839955	5.774851309	5.702804075	5.450397638
CCSER2	4.575802893	4.575083476	4.57319416	4.578110585	4.577072651	4.573786562	4.671909376	4.576346741	4.579910968	4.57829376	4.578681588	4.578865217			4.573378088	4.577081647	4.581488511	4.579232538	4.578746679	4.583887599	4.571289567	4.580875628	4.576629343	4.579715888	4.574638121	4.582571142
RUFY2	4.575802893	4.670696999	4.57319416	4.578110585	4.577072651	4.669210836	4.671909376	4.67214456	4.760433352	4.674375544	4.674819923	4.675030326			4.573378088	4.672986662	4.678036016	4.675451203	4.674894505	4.583887599	4.666349345	4.580875628	4.576629343	4.579715888	4.670186661	4.679276406
DNAI4	4.671521376	4.670696999	4.668531973	4.75814449	4.672976353	4.669210836	4.671909376	4.67214456	4.676228538	4.674375544	4.674819923	4.759103891			4.668742746	4.577081647	4.581488511	4.675451203	4.758953191	4.680784654	4.666349345	4.67733381	4.576629343	4.579715888	4.670186661	4.582571142
SUGT1P3	4.671521376	4.575083476	4.57319416	4.578110585	4.577072651	4.573786562	4.576141497	4.67214456	4.676228538	4.57829376	4.578681588	4.578865217			4.573378088	4.577081647	4.581488511	4.579232538	4.578746679	4.583887599	4.571289567	4.580875628	4.576629343	4.579715888	4.670186661	4.679276406
CFAP91	4.575802893	4.670696999	4.668531973	4.674165658	4.672976353	4.752646498	4.671909376	4.67214456	4.676228538	4.674375544	4.578681588	4.675030326			4.668742746	4.672986662	4.678036016	4.759570873	4.674894505	4.680784654	4.666349345	4.67733381	4.756261215	4.760185353	4.75372934	4.679276406
SLC33A1	6.914153272	6.489674324	6.638644923	6.808579891	6.695325374	6.640667936	6.692123733	6.692829643	6.747281636	6.795975631	6.899966175	6.784595881			6.548274146	6.320440665	6.637036268	6.486688319	6.550359453	6.48498582	6.731058002	6.736679763	6.180680559	6.66086394	6.672642262	6.837372018
CLDND1	7.645235346	7.947168409	7.75926422	8.098753238	8.078456605	7.924219604	8.147764954	7.992678117	8.218469158	8.045446446	8.019222777	7.974305808			7.991752447	7.833417348	8.0750305	7.998828516	7.914606507	7.822068417	7.94317827	7.783548309	7.589444927	7.924584029	8.013753443	7.874587859
OGDH	5.764705875	5.791263447	5.867693757	5.854354113	5.738837013	5.842741071	5.821859812	5.707125488	5.746102027	5.799691225	5.828602833	5.772647173			5.919669855	5.929925829	5.808066406	5.830064383	5.828775524	5.842398698	6.010759339	5.940412629	6.002418466	5.653388047	5.732598711	5.810901893
PHF21A	7.266314487	7.346076227	7.128154733	7.321573419	7.448527925	7.402044295	7.295653709	7.097925264	7.337565561	7.453269515	7.503975084	7.472078109			7.628323967	7.88344875	7.667805514	7.522157403	7.678496844	8.023553365	7.322538424	7.809987206	7.596965284	7.818356822	7.527828471	7.707894792
GDAP2	6.278372961	6.256708131	6.270259205	6.3236689	6.223051872	6.252696868	6.070738453	6.001615097	6.126339959	6.07700285	6.165826379	6.268385866			6.039925675	6.56064688	6.315266938	6.308238935	6.344339089	6.45057403	6.122433197	6.274582408	6.159683089	6.419663613	6.33137452	6.4463398
MCPH1	4.898853994	4.897787478	4.894986292	5.133294986	4.832060837	4.959021888	4.962727433	4.899660188	5.028065533	5.081051734	5.026029397	4.967012072			4.895259013	4.964206513	5.030677827	4.9675898	4.758953191	4.910834624	4.749471072	4.97017379	4.831447986	4.8357146	5.019330183	5.141346844
WFDC8	4.671521376	4.670696999	4.668531973	4.674165658	4.577072651	4.669210836	4.671909376	4.67214456	4.676228538	4.674375544	4.674819923	4.675030326			4.668742746	4.672986662	4.762438758	4.675451203	4.758953191	4.680784654	4.666349345	4.67733381	4.576629343	4.760185353	4.670186661	4.582571142
ZMYND11	4.671521376	4.754295638	4.668531973	4.75814449	4.672976353	4.669210836	4.755640931	4.67214456	4.676228538	4.758377372	4.758870438	4.759103891			4.668742746	4.672986662	4.678036016	4.759570873	4.674894505	4.680784654	4.666349345	4.580875628	4.672468385	4.676005019	4.670186661	4.679276406
ZNF446	6.157207032	6.044859365	6.128114271	6.076469993	6.050608221	5.994331672	6.070738453	6.158836545	6.011738524	5.982995295	6.144446914	6.101150552			6.128662562	6.139690318	5.967287516	6.124338924	6.325663512	5.973967849	6.283411645	6.172385825	6.356048217	6.081137981	6.020375924	6.019281744
TWIST2	4.671521376	4.670696999	4.57319416	4.674165658	4.672976353	4.669210836	4.671909376	4.67214456	4.579910968	4.674375544	4.674819923	4.578865217			4.668742746	4.756836295	4.678036016	4.759570873	4.674894505	4.680784654	4.666349345	4.580875628	4.672468385	4.676005019	4.670186661	4.679276406
FAM53B	4.755210397	4.754295638	4.668531973	4.674165658	4.672976353	4.669210836	4.671909376	4.67214456	4.676228538	4.674375544	4.674819923	4.675030326			4.668742746	4.756836295	4.678036016	4.675451203	4.758953191	4.765488247	4.666349345	4.761659666	4.672468385	4.760185353	4.75372934	4.763814935
GOLGA7	8.680453227	8.673834899	8.513630603	8.55409236	8.557367359	8.56236533	8.437437318	8.41310442	8.51860124	8.459013543	8.481164448	8.561168646			8.450427316	8.364433125	8.468392566	8.527618543	8.587391331	8.515363056	8.441497346	8.490461388	8.604567247	8.661680757	8.562226949	8.655733891
SH3KBP1	9.35509648	9.358486542	9.248111549	9.219620629	9.386870464	9.231825356	9.220650146	9.179878232	9.319461471	9.312338636	9.361216618	9.251849514			9.230016285	9.28165812	9.202432424	9.30501254	9.239351929	9.278620324	9.073096338	9.28199252	9.166119139	9.281593867	9.252157172	9.349305203
MBLAC1	5.793153127	5.673368755	5.728895689	5.711583456	5.824332587	5.573603287	5.736451746	5.736977583	5.653866795	5.68137247	5.585257181	5.801190191			5.605672533	5.824356473	5.65773698	5.619839068	5.800879291	5.631081863	5.836024278	5.914737605	5.850378559	5.715637972	5.761682624	5.524702941
ZMYM3	5.509166926	5.54261949	5.351075678	5.401709994	5.581428876	5.352324918	5.509944966	5.474144933	5.716130506	5.712046233	5.479403892	5.363026837			5.503592782	5.51210479	5.408993433	5.51704363	5.44196831	5.331466187	5.386982099	5.520814175	5.437297567	5.444105384	5.575632073	5.594503102
CD300LB	6.371551473	6.216977549	6.450178482	6.483021486	6.544798815	6.417984389	6.317489073	6.336770405	6.52195446	6.595815799	6.81058427	6.268385866			6.66831393	6.666540246	6.442854701	6.188522714	6.362758453	6.415266089	6.283411645	6.440880587	6.635573147	6.760394176	6.454894241	6.393083749
C3orf33	4.671521376	4.670696999	4.668531973	4.578110585	4.672976353	4.669210836	4.671909376	4.67214456	4.760433352	4.57829376	4.578681588	4.578865217			4.668742746	4.577081647	4.581488511	4.579232538	4.578746679	4.583887599	4.666349345	4.67733381	4.576629343	4.676005019	4.574638121	4.582571142
DMAC2L	6.11421114	6.276136775	6.106494082	6.226218423	6.182016899	6.213013132	6.317489073	6.240873023	6.21129524	6.099476133	6.00824889	6.144992553			6.191474675	6.182044016	6.236509738	6.102226549	6.187059994	6.046849157	6.244964487	6.107036912	6.072159043	6.058237659	5.972692125	6.066466624
FAM126B	6.335053583	6.404769679	6.231180609	6.431963689	6.339060988	6.365117494	6.459798842	6.336770405	6.538183921	6.483620352	6.550143369	6.416932181			6.609605895	6.681023532	6.460136007	6.503304721	6.743252262	6.930857676	6.078909032	6.750617212	6.707982263	6.77404574	5.871616569	6.4975821
LYNX1	5.544303408	5.50751358	5.668653729	5.617126507	5.678329243	5.539582822	5.676007664	5.545576107	5.482171416	5.51488844	5.71302594	5.551466769			5.841642826	5.738860055	5.65773698	5.830064383	5.651008972	5.563199189	5.663897072	5.623809594	5.766850073	5.587717059	5.541576858	5.488156325
SNX32	4.755210397	4.754295638	4.826698385	4.75814449	4.672976353	4.752646498	4.755640931	4.831057292	4.676228538	4.674375544	4.758870438	4.759103891			4.826952719	4.756836295	4.678036016	4.759570873	4.834374933	4.841479839	4.749471072	4.837317508	4.831447986	4.760185353	4.670186661	4.679276406
LOC554206	5.271483177	4.897787478	4.894986292	4.902274621	4.96419236	4.959021888	4.962727433	4.899660188	5.028065533	4.966113228	5.026029397	5.184583429			4.958379046	4.832073274	4.838164539	4.835046512	4.966825629	4.841479839	4.892161979	4.837317508	4.831447986	4.9046537	4.82869499	4.839660693
C11orf53	5.356575472	5.433885652	5.391097239	5.361437534	5.547274504	5.352324918	5.436220996	5.315994494	5.365228746	5.402105126	5.479403892	5.321164816			5.430119888	5.51210479	5.368549262	5.51704363	5.551189623	5.414162219	5.462741452	5.407672444	5.546237355	5.405172167	5.269156525	5.284990894
PLEKHS1	4.575802893	4.670696999	4.57319416	4.578110585	4.577072651	4.573786562	4.576141497	4.576346741	4.579910968	4.57829376	4.578681588	4.578865217			4.573378088	4.577081647	4.581488511	4.675451203	4.578746679	4.583887599	4.571289567	4.580875628	4.576629343	4.676005019	4.574638121	4.679276406
TRMT44	5.643777661	5.733740373	5.757932629	5.770691209	5.767999907	5.787855355	5.821859812	5.794581246	5.685400618	5.712046233	5.908733676	5.772647173			5.786781544	5.929925829	5.65773698	5.802153498	5.934530519	5.814347965	5.888458397	5.965579616	6.002418466	5.803420853	5.845029945	5.752903276
MANEA	5.226211339	4.961062731	4.958089577	5.08073415	5.023364134	5.267455142	4.899355941	5.13010935	5.083855234	5.081051734	5.184239499	5.082042457			5.01724184	4.900749543	5.030677827	5.08267923	5.026137212	4.910834624	5.013779632	5.029663003	5.130619815	5.136193459	5.074712018	4.908884374
C5orf46	4.755210397	4.829310755	4.826698385	4.833495658	4.832060837	4.827517541	4.830773541	4.963050343	4.835984234	4.758377372	4.834284959	4.759103891			4.826952719	4.832073274	4.838164539	4.903937406	4.903217362	4.974909316	4.892161979	4.906372237	4.900079099	4.8357146	4.897127216	4.763814935
IZUMO1	4.671521376	4.670696999	4.57319416	4.674165658	4.672976353	4.573786562	4.671909376	4.576346741	4.579910968	4.674375544	4.674819923	4.578865217			4.668742746	4.756836295	4.678036016	4.675451203	4.578746679	4.680784654	4.571289567	4.67733381	4.672468385	4.579715888	4.670186661	4.763814935
SH3YL1	5.076732377	5.127827214	5.072206902	5.08073415	5.228671091	5.073234723	5.129738602	5.07767559	5.028065533	5.183513073	5.081724113	4.967012072			5.124745594	5.131436762	5.086589317	5.135320824	5.36277721	5.090745993	5.217463012	5.281608998	5.31657482	5.083517091	5.127022547	5.088465276
PTPRO	4.575802893	4.670696999	4.57319416	4.578110585	4.577072651	4.573786562	4.576141497	4.67214456	4.676228538	4.674375544	4.674819923	4.578865217			4.668742746	4.672986662	4.678036016	4.675451203	4.674894505	4.765488247	4.666349345	4.67733381	4.756261215	4.676005019	4.75372934	4.679276406
GRIK1-AS1	4.755210397	4.754295638	4.826698385	4.833495658	4.832060837	4.827517541	4.671909376	4.755901895	4.760433352	4.833748865	4.834284959	4.759103891			4.752127066	4.756836295	4.762438758	4.759570873	4.758953191	4.910834624	5.013779632	4.761659666	4.831447986	4.676005019	4.75372934	4.839660693
ICA1L	4.898853994	4.961062731	4.894986292	5.025083574	4.96419236	5.125483784	4.962727433	4.831057292	4.904942788	5.025386996	5.026029397	4.967012072			4.958379046	5.078950039	5.086589317	4.835046512	5.026137212	4.974909316	5.068901814	5.029663003	5.02262968	5.027742458	5.019330183	4.839660693
TMLHE	5.178846269	5.270046201	5.221155733	5.230681282	5.181225517	5.125483784	5.129738602	5.13010935	5.186541852	5.183513073	5.184239499	5.277597336			5.124745594	5.438295569	5.139393123	5.08267923	5.184361414	5.193985542	5.013779632	5.188348072	5.078165685	5.233789464	5.176663242	5.239315252
MEI1	7.418371518	7.328154433	7.218156259	7.16705613	7.232828075	7.393494478	7.219573812	7.277794842	7.243529376	7.0507392	7.095850007	7.220019563			7.159488974	7.152976135	7.249464206	7.201550298	7.018714537	6.955244079	7.220575431	7.285546821	7.221414392	7.213322834	7.026207776	6.901369191
ZCCHC13	4.830305409	4.754295638	4.826698385	4.75814449	4.756824857	4.827517541	4.830773541	4.831057292	4.760433352	4.758377372	4.674819923	4.759103891			4.895259013	4.756836295	4.838164539	4.759570873	4.758953191	4.974909316	4.824064554	4.761659666	4.756261215	4.760185353	4.75372934	4.679276406
KCNS2	4.755210397	4.829310755	4.751893173	4.833495658	4.756824857	4.959021888	4.830773541	4.831057292	4.676228538	4.833748865	4.834284959	4.759103891			4.826952719	4.900749543	4.762438758	4.835046512	4.903217362	4.841479839	4.95509176	4.906372237	5.02262968	4.760185353	4.960361946	4.763814935
ARHGEF10	5.021260339	5.673368755	5.072206902	5.025083574	5.131420513	5.125483784	5.129738602	5.13010935	5.083855234	5.133625759	5.081724113	5.02633355			5.221512266	5.228688517	5.139393123	5.026941938	5.618664536	5.193985542	5.068901814	5.13828695	5.078165685	5.911564808	5.127022547	5.088465276
VPS50	4.755210397	4.670696999	4.668531973	4.75814449	4.756824857	4.752646498	4.671909376	4.831057292	4.760433352	4.758377372	4.758870438	4.675030326			4.752127066	4.672986662	4.678036016	4.759570873	4.674894505	4.680784654	4.666349345	4.67733381	4.672468385	4.676005019	4.75372934	4.839660693
LINC01869	4.962194691	4.897787478	4.958089577	4.902274621	4.900736207	4.895864666	4.899355941	4.831057292	4.968656783	4.902546106	4.966723249	4.903393038			4.958379046	4.900749543	4.907280352	4.9675898	5.081836958	4.910834624	4.892161979	4.906372237	5.130619815	4.968349985	4.897127216	4.839660693
LINC02712	4.575802893	4.575083476	4.668531973	4.674165658	4.672976353	4.669210836	4.671909376	4.67214456	4.579910968	4.57829376	4.578681588	4.675030326			4.668742746	4.672986662	4.678036016	4.675451203	4.578746679	4.583887599	4.666349345	4.67733381	4.576629343	4.676005019	4.574638121	4.582571142
BAALC-AS2	5.021260339	5.075484552	5.072206902	5.133294986	5.023364134	5.017918872	5.077319638	4.963050343	4.904942788	4.966113228	5.026029397	4.967012072			5.072526028	5.023379039	5.030677827	5.08267923	5.134443588	5.090745993	5.068901814	5.188348072	5.130619815	5.083517091	4.897127216	5.03247027
CREBRF	7.127517685	7.225310343	6.764753064	7.016396515	6.918713951	6.684015857	6.493154042	6.573822934	6.616562332	6.432554941	6.627562578	6.715685762			7.685258043	7.788155855	7.593408877	7.70167038	7.788275378	7.684524462	7.057733714	7.708211973	7.171682421	7.491789128	6.945862987	7.392533142
KATNAL2	4.671521376	4.670696999	4.668531973	4.674165658	4.756824857	4.669210836	4.755640931	4.755901895	4.676228538	4.674375544	4.674819923	4.675030326			4.752127066	4.756836295	4.678036016	4.675451203	4.758953191	4.765488247	4.749471072	4.761659666	4.756261215	4.676005019	4.670186661	4.679276406
CTNNA3	4.575802893	4.575083476	4.57319416	4.674165658	4.577072651	4.669210836	4.576141497	4.576346741	4.579910968	4.57829376	4.578681588	4.578865217			4.573378088	4.672986662	4.581488511	4.579232538	4.578746679	4.583887599	4.571289567	4.580875628	4.672468385	4.579715888	4.574638121	4.582571142
ZADH2	6.719159669	6.600291055	6.578663466	6.360743561	6.666509513	6.610991561	6.317489073	6.280062731	6.488904154	6.580340678	6.398649606	6.518511003			6.751939237	6.262881846	6.407616136	6.345869864	6.362758453	6.360511157	6.427028752	6.332333192	6.201348807	6.231111893	6.729002433	6.578922309
ITGAL	9.964561543	10.29999739	9.945567755	10.08717745	10.29757527	10.210885	9.958864876	10.14055271	10.22279176	10.47502528	10.06960869	10.27784594			9.864500625	10.00730074	9.926716296	10.17260038	10.11383832	9.952390751	10.00202827	10.07267816	10.0024533	9.825485205	10.09399064	10.1913666
COCH	6.996585905	7.175968509	6.975598912	7.339753166	7.035134072	6.989227678	7.189953387	7.332999147	7.214054273	7.207986428	7.314571128	7.296726601			7.159488974	6.989753373	7.229866027	7.221399823	7.219574035	7.082271434	6.945459694	7.304356737	7.191786011	7.271664709	7.091591694	7.224014483
C1orf210	4.671521376	4.670696999	4.668531973	4.578110585	4.672976353	4.573786562	4.671909376	4.67214456	4.579910968	4.674375544	4.674819923	4.675030326			4.668742746	4.672986662	4.581488511	4.675451203	4.674894505	4.680784654	4.666349345	4.67733381	4.672468385	4.579715888	4.574638121	4.679276406
ZNF638	7.330914217	7.678065119	7.356482444	7.339753166	7.423293005	7.524474089	7.394004672	7.377414144	7.281897008	7.198031912	7.248581519	7.229838712			7.538416459	7.513744011	7.645891353	7.489908313	7.455026662	7.466523889	7.357867277	7.437994021	7.250433946	7.547766515	7.308297691	7.679320966
HP1BP3	7.218295782	7.432436937	7.198646317	7.15681352	7.261657191	7.965003475	7.916016219	7.268381067	7.233772515	7.157496264	7.169187309	7.512729335			7.779733312	8.083847026	7.379539008	7.904438645	7.827360357	7.706019914	7.171679051	7.304356737	7.306745038	7.099664089	7.962752136	7.469830721
CERS3	4.671521376	4.670696999	4.668531973	4.674165658	4.672976353	4.669210836	4.671909376	4.67214456	4.676228538	4.674375544	4.674819923	4.675030326			4.668742746	4.672986662	4.678036016	4.675451203	4.674894505	4.765488247	4.749471072	4.67733381	4.756261215	4.676005019	4.75372934	4.679276406
PCNX2	5.435473681	5.703930746	5.173956297	5.440565417	5.317485076	5.352324918	5.357289055	5.436673943	5.405592794	5.36182334	5.32078794	5.321164816			5.430119888	5.228688517	5.282831612	5.443039689	5.277360745	5.331466187	5.386982099	5.236034308	5.18039492	5.186176547	5.269156525	5.328767218
DNAJC5B	5.178846269	5.127827214	5.124413185	5.183169958	5.023364134	5.125483784	5.129738602	5.07767559	5.279684298	5.025386996	5.134326058	5.082042457			5.266638909	5.228688517	5.139393123	5.135320824	5.277360745	5.090745993	5.120970451	5.236034308	5.358317046	5.279295022	5.127022547	5.191521938
GPSM1	5.396730309	5.395177263	5.467038197	5.401709994	5.359251073	5.468374146	5.473682467	5.510416531	5.083855234	5.36182334	5.402941657	5.321164816			5.538626124	5.51210479	5.408993433	5.404129882	5.551189623	5.45329702	5.386982099	5.520814175	5.677224081	5.481732331	5.354120326	5.191521938
FRYL	7.117060602	7.027842197	6.940631564	6.872979312	6.978133623	7.181094606	6.939427289	7.02126332	7.034279995	7.09441889	7.007067625	7.107242122			6.868614822	6.918746247	6.994119637	6.772363908	6.960710964	6.906038139	6.731058002	6.932342651	6.880229014	6.787564216	7.112727499	7.173405025
KLHL29	4.755210397	4.897787478	4.826698385	4.75814449	4.756824857	4.895864666	4.899355941	4.899660188	4.835984234	4.758377372	4.834284959	4.834538784			4.958379046	4.900749543	4.907280352	4.759570873	4.834374933	4.910834624	4.95509176	4.906372237	4.900079099	4.968349985	4.82869499	4.839660693
CKAP2	4.755210397	4.897787478	4.668531973	5.025083574	4.756824857	4.752646498	4.830773541	4.755901895	4.760433352	4.902546106	4.834284959	4.675030326			4.895259013	4.964206513	5.030677827	4.9675898	4.834374933	4.841479839	4.749471072	4.837317508	4.672468385	4.9046537	4.82869499	4.839660693
MORN1	4.830305409	4.754295638	4.826698385	4.902274621	4.900736207	4.752646498	4.899355941	4.899660188	4.835984234	4.902546106	4.966723249	4.759103891			4.895259013	4.964206513	4.762438758	4.835046512	4.834374933	4.841479839	4.824064554	4.906372237	4.96349495	4.9046537	4.82869499	4.839660693
CENPL	5.874778949	5.433885652	5.429713635	5.401709994	5.274018851	5.431022032	5.272159431	5.22726495	5.365228746	5.36182334	5.277230825	5.479817335			5.174301141	5.274036814	5.368549262	5.321918649	5.36277721	5.287615833	5.217463012	5.446661785	5.227812396	5.186176547	5.394215697	5.524702941
ERAP2	4.755210397	4.754295638	4.751893173	4.75814449	4.756824857	4.669210836	4.671909376	4.755901895	4.676228538	4.674375544	4.758870438	4.759103891			4.752127066	4.756836295	4.838164539	4.759570873	4.674894505	4.841479839	4.666349345	4.761659666	4.672468385	4.760185353	4.75372934	4.763814935
SSH1	5.129126928	5.177497987	5.221155733	5.183169958	5.023364134	5.125483784	5.129738602	4.963050343	5.083855234	5.183513073	5.184239499	5.02633355			5.124745594	5.317503549	5.237220415	5.185271371	5.320921533	5.090745993	5.347058047	5.13828695	5.437297567	5.083517091	5.31248499	5.141346844
SART3	4.830305409	4.961062731	4.826698385	4.75814449	4.900736207	4.752646498	4.755640931	4.831057292	4.835984234	4.758377372	4.758870438	4.834538784			5.072526028	5.023379039	5.030677827	4.9675898	5.081836958	5.090745993	4.892161979	4.837317508	4.900079099	5.027742458	5.019330183	5.088465276
FANCM	5.129126928	5.02006822	4.894986292	4.965825102	4.832060837	4.895864666	4.755640931	4.899660188	4.904942788	4.833748865	4.834284959	5.082042457			4.826952719	4.900749543	4.971137515	4.835046512	4.966825629	4.765488247	4.824064554	4.906372237	4.756261215	5.027742458	4.960361946	4.908884374
TRMT2B	5.178846269	5.395177263	5.309517974	5.276091045	5.228671091	5.352324918	5.272159431	5.272569315	5.323310776	5.319991913	5.362640132	5.232142525			5.309895962	5.359270028	5.282831612	5.404129882	5.134443588	5.193985542	5.305602893	5.446661785	5.31657482	5.083517091	5.354120326	5.141346844
C9orf43	4.755210397	4.754295638	4.751893173	4.75814449	4.832060837	4.752646498	4.830773541	4.67214456	4.760433352	4.758377372	4.674819923	4.759103891			4.752127066	4.756836295	4.762438758	4.759570873	4.834374933	4.765488247	4.824064554	4.761659666	4.756261215	4.676005019	4.82869499	4.908884374
NOCT	5.021260339	5.02006822	5.072206902	4.965825102	5.023364134	5.125483784	5.021821388	5.17986539	5.083855234	5.133625759	5.081724113	5.134657618			5.01724184	5.131436762	5.030677827	4.9675898	4.903217362	5.193985542	4.749471072	5.08552719	5.02262968	5.083517091	5.074712018	5.141346844
HAVCR2	5.975977077	6.236991504	6.398681385	6.226218423	6.496214277	6.31008772	6.199868462	6.200491318	6.366444208	6.305311315	6.484888044	6.925143689			6.170868777	6.139690318	6.236509738	6.146083846	5.959642808	5.922969332	6.033877295	5.965579616	5.850378559	6.271008797	6.568095258	6.134178607
FLJ25758	5.764705875	5.872825925	5.893689395	5.711583456	5.904326788	5.815601397	5.706606546	5.849619762	5.831863608	5.854845552	5.908733676	5.651299987			5.993168695	6.139690318	5.916413596	5.857363544	6.00843371	5.948723805	5.862515434	5.914737605	6.138344816	5.911564808	5.817865245	5.722843002
TRIM4	7.666766431	7.505910602	7.712154489	7.60282071	7.713964099	7.615354722	7.525892478	7.738462152	7.888777027	7.596018302	7.437987886	7.896835318			7.321604204	7.431789455	7.530961058	7.465232188	7.369034114	7.516130696	7.409262706	7.708211973	7.288222607	7.233038991	7.574011562	7.365802531
FAM160B1	4.671521376	4.754295638	4.57319416	4.578110585	4.577072651	4.669210836	4.576141497	4.576346741	4.676228538	4.57829376	4.674819923	4.578865217			4.573378088	4.672986662	4.678036016	4.675451203	4.578746679	4.680784654	4.666349345	4.67733381	4.672468385	4.676005019	4.574638121	4.679276406
UHRF1BP1L	5.021260339	5.075484552	4.958089577	5.08073415	5.131420513	5.073234723	4.899355941	4.963050343	5.083855234	5.133625759	5.081724113	5.02633355			5.35146356	5.61463786	5.408993433	5.404129882	5.36277721	5.695294815	5.170384704	5.367259387	5.358317046	5.279295022	5.223954398	5.488156325
TTBK2	4.671521376	4.575083476	4.57319416	4.674165658	4.672976353	4.669210836	4.671909376	4.576346741	4.676228538	4.57829376	4.578681588	4.675030326			4.573378088	4.577081647	4.678036016	4.675451203	4.674894505	4.583887599	4.571289567	4.580875628	4.672468385	4.579715888	4.670186661	4.679276406
CYP19A1	4.575802893	4.575083476	4.57319416	4.578110585	4.672976353	4.573786562	4.576141497	4.576346741	4.579910968	4.57829376	4.674819923	4.578865217			4.573378088	4.672986662	4.581488511	4.579232538	4.578746679	4.680784654	4.571289567	4.67733381	4.576629343	4.676005019	4.574638121	4.582571142
WDR49	4.575802893	4.575083476	4.57319416	4.578110585	4.577072651	4.573786562	4.671909376	4.576346741	4.579910968	4.57829376	4.674819923	4.578865217			4.668742746	4.577081647	4.581488511	4.579232538	4.578746679	4.680784654	4.571289567	4.580875628	4.576629343	4.579715888	4.670186661	4.582571142
NPAS4	4.671521376	4.754295638	4.668531973	4.674165658	4.577072651	4.669210836	4.671909376	4.755901895	4.760433352	4.674375544	4.674819923	4.578865217			4.668742746	4.672986662	4.678036016	4.675451203	4.674894505	4.680784654	4.666349345	4.761659666	4.672468385	4.760185353	4.574638121	4.679276406
SVOPL	4.830305409	4.754295638	4.751893173	4.833495658	4.832060837	4.895864666	4.962727433	4.899660188	4.760433352	4.758377372	4.834284959	4.903393038			4.826952719	4.672986662	4.762438758	4.759570873	4.903217362	4.765488247	4.824064554	4.761659666	4.831447986	4.760185353	4.82869499	4.763814935
LHFPL3-AS1	4.575802893	4.670696999	4.57319416	4.674165658	4.577072651	4.669210836	4.576141497	4.67214456	4.579910968	4.57829376	4.578681588	4.675030326			4.668742746	4.672986662	4.581488511	4.579232538	4.578746679	4.680784654	4.666349345	4.67733381	4.672468385	4.8357146	4.574638121	4.679276406
HNMT	5.129126928	5.355059147	5.429713635	5.133294986	5.181225517	5.310735353	5.272159431	5.315994494	5.136545634	5.231035996	5.184239499	5.134657618			5.221512266	5.274036814	5.189495458	5.27833044	5.277360745	5.090745993	5.386982099	5.281608998	5.546237355	5.186176547	5.223954398	5.088465276
LOC91370	4.755210397	4.754295638	4.826698385	4.902274621	4.832060837	4.827517541	4.830773541	4.831057292	4.835984234	4.833748865	4.834284959	4.759103891			4.826952719	4.832073274	4.907280352	4.903937406	4.834374933	4.910834624	4.824064554	4.761659666	5.02262968	4.760185353	4.75372934	4.839660693
ITPKB	6.198840724	6.473113213	5.944128742	6.3236689	6.301500546	5.994331672	5.952369224	6.115818467	6.081704959	5.907671727	5.71302594	5.883084877			6.308802746	6.282345189	6.315266938	6.503304721	6.468285423	6.360511157	6.339082714	6.351042989	6.026086224	6.328701064	5.640914226	5.919372936
GABRA2	4.575802893	4.670696999	4.668531973	4.674165658	4.577072651	4.669210836	4.576141497	4.67214456	4.579910968	4.57829376	4.578681588	4.578865217			4.573378088	4.672986662	4.581488511	4.675451203	4.674894505	4.583887599	4.571289567	4.580875628	4.576629343	4.676005019	4.670186661	4.582571142
EIF4G3	5.076732377	5.433885652	5.016936974	5.183169958	5.317485076	5.073234723	5.129738602	5.07767559	5.028065533	5.081051734	5.081724113	5.232142525			5.467453006	5.738860055	5.48572119	5.404129882	5.403082047	5.527720859	5.305602893	5.446661785	5.18039492	5.444105384	5.31248499	5.239315252
SUPT6H	4.575802893	4.670696999	4.57319416	4.674165658	4.672976353	4.669210836	4.576141497	4.67214456	4.676228538	4.57829376	4.674819923	4.759103891			4.668742746	4.577081647	4.581488511	4.675451203	4.578746679	4.583887599	4.666349345	4.67733381	4.672468385	4.676005019	4.670186661	4.679276406
RNF170	5.705750319	5.50751358	5.538195299	5.549702221	5.475780357	5.504532086	5.545095828	5.436673943	5.482171416	5.584334578	5.551037433	5.516200433			5.669112897	5.67835167	5.625290019	5.619839068	5.772339972	5.563199189	5.567650881	5.718565495	5.707839955	5.481732331	5.640914226	5.450397638
PGLS	6.219175292	6.314165232	6.289376571	6.246287465	6.223051872	6.328682963	6.136893184	6.35515187	6.60124119	6.361323873	6.468073577	6.381306193			6.308802746	6.320440665	6.334251523	6.345869864	6.325663512	6.322729416	6.302227279	6.369495807	6.201348807	6.328701064	6.110766989	6.239803548
TRMT61A	5.643777661	5.609802316	5.605226979	5.549702221	5.64689776	5.670132517	5.509944966	5.645114208	5.5539113	5.440969431	5.618507166	5.321164816			5.605672533	5.475800624	5.522220105	5.586567617	5.403082047	5.45329702	5.498788233	5.556165515	5.511065785	5.481732331	5.269156525	5.524702941
RPS6KA5	4.575802893	4.575083476	4.57319416	4.674165658	4.672976353	4.573786562	4.671909376	4.67214456	4.579910968	4.57829376	4.578681588	4.675030326			4.668742746	4.756836295	4.678036016	4.675451203	4.758953191	4.765488247	4.666349345	4.761659666	4.672468385	4.760185353	4.75372934	4.679276406
NFS1	5.356575472	5.177497987	5.351075678	5.183169958	5.317485076	5.22230402	5.129738602	5.17986539	5.279684298	5.319991913	5.277230825	5.277597336			5.072526028	4.900749543	5.189495458	5.08267923	4.966825629	5.193985542	5.068901814	5.188348072	4.831447986	5.136193459	5.127022547	5.284990894
HDAC4	5.129126928	5.177497987	5.391097239	5.319615918	5.228671091	5.125483784	5.315573	5.315994494	5.279684298	5.36182334	5.184239499	5.277597336			5.430119888	5.438295569	5.591930826	5.404129882	5.479550448	5.631081863	5.262464373	5.520814175	5.358317046	5.481732331	5.31248499	5.488156325
DYNC2LI1	4.575802893	4.670696999	4.57319416	4.674165658	4.577072651	4.669210836	4.671909376	4.67214456	4.579910968	4.674375544	4.674819923	4.675030326			4.573378088	4.672986662	4.678036016	4.579232538	4.674894505	4.680784654	4.666349345	4.67733381	4.576629343	4.676005019	4.670186661	4.679276406
DOCK2	4.755210397	4.829310755	4.826698385	4.75814449	4.832060837	4.895864666	4.830773541	4.831057292	4.835984234	4.833748865	4.903120894	4.759103891			4.826952719	4.832073274	4.907280352	4.903937406	4.903217362	4.841479839	4.824064554	4.837317508	4.831447986	4.9046537	4.75372934	4.839660693
CANT1	5.076732377	5.075484552	5.124413185	5.08073415	5.078934438	5.125483784	5.021821388	5.07767559	5.028065533	4.966113228	5.026029397	5.02633355			5.174301141	5.181242373	5.139393123	5.08267923	5.134443588	5.331466187	5.170384704	5.13828695	5.18039492	5.279295022	5.019330183	5.088465276
STXBP4	4.671521376	4.575083476	4.57319416	4.578110585	4.672976353	4.669210836	4.671909376	4.67214456	4.676228538	4.57829376	4.578681588	4.578865217			4.573378088	4.577081647	4.581488511	4.579232538	4.578746679	4.583887599	4.571289567	4.580875628	4.576629343	4.579715888	4.574638121	4.679276406
LRRC18	4.830305409	4.829310755	4.894986292	4.833495658	4.900736207	4.827517541	4.899355941	4.899660188	4.904942788	4.833748865	4.758870438	4.759103891			4.895259013	4.900749543	4.838164539	4.903937406	4.834374933	4.910834624	4.95509176	4.837317508	4.900079099	4.9046537	4.897127216	4.839660693
SLCO4A1-AS1	5.021260339	5.127827214	5.221155733	5.133294986	5.131420513	5.073234723	5.129738602	5.022161454	4.968656783	5.133625759	5.184239499	5.082042457			5.221512266	5.131436762	5.189495458	5.185271371	4.966825629	5.241861901	5.068901814	5.08552719	5.31657482	5.186176547	5.074712018	5.088465276
DNAJA4	4.671521376	4.670696999	4.57319416	4.75814449	4.672976353	4.573786562	4.576141497	4.576346741	4.676228538	4.758377372	4.674819923	4.675030326			4.573378088	4.672986662	4.678036016	4.579232538	4.674894505	4.680784654	4.571289567	4.580875628	4.576629343	4.579715888	4.574638121	4.679276406
CYTH4	6.475469966	6.74429184	6.531888698	6.821700491	6.778333959	6.966195847	6.775077469	6.903919803	6.87937337	6.994156446	6.960476158	7.074849999			6.987735366	7.271171864	7.073499186	6.974261247	7.324000226	7.540299961	6.771377643	7.429466056	7.022296959	7.193327461	6.860618504	7.243761035
FARP2	4.830305409	4.754295638	4.751893173	4.833495658	4.900736207	4.752646498	4.830773541	4.755901895	4.904942788	4.833748865	4.834284959	4.675030326			4.752127066	4.756836295	4.762438758	4.759570873	4.758953191	4.910834624	4.749471072	4.761659666	4.831447986	4.760185353	4.75372934	4.763814935
COG3	4.755210397	4.670696999	4.57319416	4.75814449	4.672976353	4.669210836	4.671909376	4.67214456	4.760433352	4.674375544	4.674819923	4.759103891			4.752127066	4.672986662	4.762438758	4.675451203	4.674894505	4.680784654	4.666349345	4.67733381	4.576629343	4.676005019	4.670186661	4.679276406
DRAXIN	4.755210397	4.829310755	4.826698385	4.674165658	5.023364134	4.959021888	4.899355941	4.67214456	4.904942788	4.966113228	4.834284959	4.834538784			4.752127066	4.756836295	4.762438758	5.08267923	4.758953191	4.680784654	4.749471072	4.761659666	4.900079099	4.760185353	4.82869499	4.908884374
HELQ	5.951423145	5.703930746	5.699149716	5.770691209	5.738837013	5.787855355	5.952369224	5.794581246	5.937748124	5.741963639	5.742956335	5.82909			5.729367494	5.646919862	5.689327521	5.683711093	5.618664536	5.597629627	5.498788233	5.748569239	5.546237355	5.911564808	5.672257627	5.945092732
STAP1	7.106525252	6.155050656	6.170313134	6.610501176	6.161010743	6.192716302	6.603862372	6.443475127	6.348006529	6.206396067	6.00824889	6.144992553			5.993168695	5.76802324	6.494052393	6.102226549	5.772339972	6.093249137	6.056588734	5.940412629	5.580373693	5.858659557	5.948167464	5.692021059
GIN1	6.632766073	6.439372428	6.270259205	6.304739867	6.339060988	6.347023782	6.136893184	6.493828755	6.52195446	6.449791229	6.306520992	6.399236727			6.0626842	5.904351439	6.039995332	5.910241939	6.100803272	5.869833136	5.781288159	6.172385825	5.978306672	6.12576465	6.255331052	6.239803548
GNB5	5.509166926	5.703930746	5.699149716	5.649447106	5.64689776	5.730415168	5.644609838	5.510416531	5.5539113	5.68137247	5.515778871	5.442229714			5.669112897	5.738860055	5.689327521	5.773599022	5.772339972	5.663618243	5.694326353	5.748569239	5.953732007	5.653388047	5.506489885	5.524702941
CDKN2AIPNL	5.271483177	5.54261949	5.391097239	5.401709994	5.614616095	5.392376773	5.397461167	5.510416531	5.234167106	5.36182334	5.32078794	5.184583429			5.391494528	5.547295551	5.591930826	5.51704363	5.551189623	5.373596428	5.567650881	5.556165515	5.273133659	5.322910499	5.354120326	5.284990894
ATP23	4.898853994	4.961062731	4.894986292	4.833495658	4.96419236	4.895864666	4.830773541	5.022161454	4.968656783	4.966113228	4.966723249	4.967012072			4.958379046	4.964206513	4.971137515	4.9675898	5.026137212	4.974909316	4.95509176	4.97017379	4.96349495	5.027742458	4.897127216	4.763814935
DENND4A	7.178669515	7.093243543	6.88033519	6.934533867	6.906520752	6.88245905	6.840604581	6.879220809	6.940999562	7.0507392	7.106563558	6.925143689			7.086914369	6.978166258	7.229866027	7.119235112	6.875239545	6.815516516	6.957100807	7.026462891	6.917122277	6.787564216	7.059280122	7.043967171
SIAE	4.575802893	4.575083476	4.57319416	4.578110585	4.577072651	4.573786562	4.576141497	4.576346741	4.579910968	4.57829376	4.578681588	4.578865217			4.668742746	4.577081647	4.581488511	4.579232538	4.578746679	4.583887599	4.571289567	4.580875628	4.576629343	4.579715888	4.574638121	4.582571142
GINS4	4.755210397	4.829310755	4.751893173	4.75814449	4.832060837	4.827517541	4.830773541	4.67214456	4.760433352	4.833748865	4.758870438	4.759103891			4.826952719	4.672986662	4.838164539	4.835046512	4.966825629	4.765488247	4.749471072	4.837317508	4.756261215	4.9046537	4.75372934	4.839660693
FCHSD2	5.396730309	5.609802316	5.637362702	5.649447106	5.359251073	5.468374146	5.436220996	5.272569315	5.62147878	5.584334578	5.682338706	5.551466769			5.637815193	5.824356473	5.779441691	5.714417451	5.713190354	6.093249137	5.567650881	5.687802188	5.580373693	5.774851309	5.541576858	5.810901893
BTG4	4.671521376	4.575083476	4.57319416	4.674165658	4.577072651	4.669210836	4.576141497	4.576346741	4.579910968	4.57829376	4.674819923	4.578865217			4.573378088	4.672986662	4.581488511	4.675451203	4.578746679	4.680784654	4.571289567	4.67733381	4.672468385	4.760185353	4.670186661	4.582571142
PPP2R5C	5.178846269	5.609802316	5.173956297	5.440565417	5.438275719	5.539582822	5.676007664	5.436673943	5.588180918	5.478530615	5.551037433	5.479817335			5.430119888	5.438295569	5.368549262	5.51704363	5.320921533	5.373596428	5.262464373	5.446661785	5.358317046	5.364818036	5.608724085	5.627904316
CALHM1	4.962194691	4.961062731	5.016936974	4.965825102	4.96419236	4.959021888	4.962727433	4.899660188	5.083855234	4.966113228	4.966723249	4.903393038			5.01724184	5.078950039	5.030677827	5.026941938	5.026137212	5.034649503	5.305602893	5.029663003	5.130619815	5.027742458	4.897127216	4.97283973
PKD1L2	4.830305409	4.670696999	4.826698385	4.833495658	4.832060837	4.827517541	4.899355941	4.831057292	4.835984234	4.902546106	4.834284959	4.834538784			4.826952719	5.023379039	4.838164539	4.835046512	5.081836958	4.841479839	4.95509176	4.906372237	4.96349495	4.760185353	4.82869499	4.839660693
NR1H4	4.755210397	4.829310755	4.751893173	4.674165658	4.832060837	4.752646498	4.755640931	4.576346741	4.760433352	4.758377372	4.674819923	4.675030326			4.752127066	4.756836295	4.762438758	4.835046512	4.758953191	4.765488247	4.824064554	4.761659666	4.756261215	4.760185353	4.75372934	4.763814935
HACD1	5.178846269	5.127827214	5.016936974	5.133294986	5.078934438	5.073234723	5.179480794	5.13010935	5.279684298	5.081051734	5.231786974	5.082042457			5.174301141	5.181242373	5.237220415	5.026941938	5.026137212	5.193985542	5.462741452	5.08552719	5.18039492	5.136193459	5.019330183	5.488156325
PDE1C	4.671521376	4.670696999	4.751893173	4.75814449	4.756824857	4.752646498	4.671909376	4.755901895	4.676228538	4.674375544	4.674819923	4.675030326			4.752127066	4.756836295	4.678036016	4.759570873	4.758953191	4.765488247	4.824064554	4.761659666	4.831447986	4.760185353	4.75372934	4.763814935
TP73	4.962194691	4.961062731	4.894986292	4.965825102	4.900736207	5.017918872	5.021821388	4.899660188	4.968656783	4.833748865	4.903120894	4.903393038			4.958379046	5.023379039	4.838164539	4.903937406	4.903217362	5.034649503	4.892161979	4.906372237	5.02262968	4.8357146	4.82869499	4.908884374
NEK11	5.076732377	5.075484552	5.016936974	5.08073415	5.078934438	5.175066943	5.077319638	5.13010935	5.028065533	5.025386996	5.081724113	5.02633355			5.124745594	5.023379039	5.086589317	5.08267923	5.184361414	5.090745993	5.262464373	5.029663003	5.18039492	5.027742458	5.176663242	4.908884374
LINC00656	5.271483177	5.313399888	5.351075678	5.230681282	5.359251073	5.468374146	5.179480794	5.22726495	5.234167106	5.276456696	5.184239499	5.134657618			5.467453006	5.51210479	5.237220415	5.363800328	5.277360745	5.373596428	5.305602893	5.13828695	5.580373693	5.322910499	5.127022547	5.191521938
TRAM2	5.021260339	5.127827214	5.016936974	5.133294986	5.078934438	5.017918872	5.129738602	5.13010935	5.136545634	5.133625759	5.026029397	5.184583429			5.072526028	5.131436762	5.086589317	5.08267923	4.966825629	5.090745993	5.068901814	5.08552719	5.02262968	5.083517091	5.074712018	5.088465276
PADI2	4.671521376	4.670696999	4.668531973	4.674165658	4.672976353	4.669210836	4.671909376	4.755901895	4.676228538	4.758377372	4.674819923	4.675030326			4.668742746	4.832073274	4.581488511	4.675451203	4.966825629	4.910834624	4.666349345	4.761659666	4.831447986	4.968349985	4.670186661	4.97283973
CST9	4.898853994	4.897787478	4.894986292	4.833495658	4.832060837	4.895864666	4.830773541	4.831057292	4.835984234	4.758377372	4.834284959	4.834538784			4.826952719	4.900749543	4.838164539	4.9675898	4.834374933	4.910834624	4.95509176	4.906372237	4.756261215	4.9046537	4.82869499	4.763814935
VPS29	5.874778949	5.762838754	5.944128742	5.881039214	5.929900938	6.041107813	5.765584463	5.952942608	6.011738524	6.07700285	5.934350579	6.144992553			5.814515167	5.851592803	5.863410027	5.744366285	5.800879291	6.023010776	5.862515434	5.888531134	5.953732007	5.774851309	5.871616569	5.919372936
ACTR2	8.666333699	8.925162458	9.325821096	9.384969196	9.087955864	8.913572162	8.347220458	8.991472793	9.237229887	8.897122373	9.032523586	8.911734682			8.634443787	8.561242808	9.016696428	8.907272984	8.748283374	8.957435279	8.35732707	8.944417913	9.168630489	8.78589586	8.584843712	9.291772651
AZIN2	5.178846269	5.177497987	5.173956297	5.230681282	5.317485076	5.22230402	5.357289055	5.22726495	5.279684298	5.231035996	5.277230825	5.134657618			5.266638909	5.317503549	5.030677827	5.27833044	5.231913008	5.491116316	5.170384704	5.236034308	5.358317046	5.364818036	5.019330183	5.191521938
NELL1	4.671521376	4.670696999	4.668531973	4.674165658	4.672976353	4.573786562	4.671909376	4.67214456	4.676228538	4.674375544	4.674819923	4.675030326			4.668742746	4.756836295	4.678036016	4.675451203	4.674894505	4.765488247	4.666349345	4.67733381	4.756261215	4.760185353	4.670186661	4.679276406
UEVLD	5.764705875	5.762838754	5.757932629	5.827087701	5.738837013	5.815601397	6.001031565	5.822404948	5.775356658	5.771166046	5.800708563	5.713489757			5.841642826	5.76802324	5.689327521	5.714417451	5.882763593	5.869833136	5.72400799	5.914737605	5.978306672	5.803420853	5.640914226	5.627904316
LYG2	4.898853994	4.961062731	4.958089577	5.08073415	4.96419236	5.017918872	4.899355941	4.963050343	5.028065533	4.966113228	5.026029397	4.967012072			4.895259013	4.964206513	4.971137515	4.9675898	4.966825629	4.910834624	4.892161979	4.906372237	4.96349495	4.9046537	4.960361946	5.088465276
DYNLT2	4.755210397	4.829310755	4.826698385	4.75814449	4.900736207	4.752646498	4.755640931	4.831057292	4.676228538	4.833748865	4.758870438	4.834538784			4.826952719	4.756836295	4.762438758	4.835046512	4.834374933	4.765488247	4.749471072	4.97017379	4.831447986	4.9046537	4.75372934	4.763814935
CLEC7A	7.926559502	7.575773938	8.714119126	8.721671029	8.221272021	8.059467603	7.83595564	7.82406247	8.068543666	8.404290004	8.998819638	8.34084712			9.295145695	9.327389114	9.421413268	8.975409687	9.318894457	9.74078865	8.646839027	9.050385505	9.029100286	9.325437748	8.983998517	9.326567069
TK1	5.356575472	5.177497987	5.266271351	5.183169958	5.399470662	5.310735353	5.272159431	5.272569315	5.365228746	5.319991913	5.277230825	5.442229714			5.309895962	5.078950039	5.139393123	5.08267923	5.231913008	5.373596428	5.217463012	5.281608998	5.358317046	5.233789464	5.31248499	5.191521938
RCC1L	5.129126928	5.270046201	5.072206902	5.133294986	5.023364134	5.175066943	5.129738602	5.07767559	5.234167106	5.081051734	5.134326058	5.277597336			5.174301141	5.023379039	5.086589317	5.135320824	5.081836958	5.090745993	5.120970451	5.029663003	4.96349495	5.027742458	5.019330183	5.141346844
CTNNB1	6.000068735	5.99802248	6.084509773	5.982479495	6.223051872	5.970289261	6.093164936	6.001615097	6.058800298	6.164666009	6.122713313	6.502099675			6.251432797	6.393530912	6.152781067	6.364296876	5.85606051	6.046849157	6.100852647	6.084507731	6.049327574	6.12576465	6.043571397	6.177448972
OSGIN2	5.793153127	5.64200922	5.757932629	5.711583456	5.678329243	5.670132517	5.736451746	5.766116955	5.62147878	5.933278335	5.855885919	5.856378445			6.016759318	5.67835167	5.750136231	5.830064383	5.908911889	6.046849157	5.808958171	5.861767998	5.795323212	6.058237659	5.923161283	6.177448972
TAF5L	6.000068735	5.846226641	5.637362702	5.827087701	5.678329243	5.759471391	5.579212308	5.676519456	5.859182544	5.68137247	5.650849164	5.651299987			5.669112897	5.796510534	5.836045187	5.910241939	5.800879291	5.842398698	5.752982825	5.834420979	5.645808616	5.587717059	5.672257627	5.752903276
APH1A	7.451898884	7.145513123	7.365240897	7.16705613	7.242503269	7.230058829	7.00921226	7.065581011	7.253219336	7.237435704	7.267751908	7.18004545			7.530661463	7.079157068	7.028690683	7.119235112	7.169430177	7.188563725	6.897900689	7.082233411	7.010993389	7.173044672	7.174295499	7.193867109
SPOCK3	4.671521376	4.670696999	4.57319416	4.674165658	4.577072651	4.669210836	4.576141497	4.67214456	4.676228538	4.57829376	4.674819923	4.675030326			4.573378088	4.672986662	4.581488511	4.579232538	4.578746679	4.583887599	4.666349345	4.580875628	4.672468385	4.676005019	4.670186661	4.582571142
GGNBP2	4.898853994	4.961062731	4.958089577	4.902274621	4.96419236	5.017918872	4.962727433	4.899660188	4.968656783	4.966113228	4.966723249	5.082042457			4.958379046	4.900749543	4.907280352	4.9675898	5.081836958	4.974909316	5.013779632	4.97017379	5.02262968	4.9046537	4.960361946	4.97283973
ATF3	4.898853994	4.829310755	4.894986292	4.833495658	4.900736207	4.895864666	4.899355941	4.899660188	4.760433352	4.833748865	4.834284959	4.834538784			4.958379046	4.900749543	4.838164539	4.903937406	4.903217362	4.910834624	4.95509176	4.906372237	4.96349495	4.8357146	4.75372934	4.763814935
FBXO7	8.907452687	8.824133431	8.655079734	8.711317378	8.84540117	8.733601426	8.747155107	8.636386023	8.51860124	8.746332873	8.682252943	8.745406888			8.755180649	8.730926763	8.770184749	8.826154192	8.639401569	9.469959649	8.650378269	8.790886815	8.722149124	8.435820009	8.82852605	8.716512793
FIP1L1	5.544303408	5.609802316	5.309517974	5.361437534	5.359251073	5.392376773	5.129738602	5.545576107	5.444535456	5.319991913	5.231786974	5.321164816			5.266638909	5.131436762	5.282831612	5.363800328	5.134443588	5.287615833	5.068901814	5.367259387	5.078165685	5.444105384	5.176663242	5.41132636
NLGN2	6.023716927	6.133743518	6.250863503	6.360743561	6.202693618	6.365117494	6.240242599	6.260612133	6.011738524	6.121568693	6.380721838	5.959973532			6.251432797	6.411200023	6.13098991	6.079732911	6.166021103	6.243805772	6.100852647	6.332333192	6.337662279	6.189977453	6.153715287	6.089430298
DMWD	5.675163238	5.609802316	5.637362702	5.741494725	5.678329243	5.787855355	5.821859812	5.612859804	5.588180918	5.649896911	5.742956335	5.651299987			5.637815193	5.51210479	5.779441691	5.652201697	5.651008972	5.814347965	5.752982825	5.940412629	5.645808616	5.653388047	5.732598711	5.56012582
SMIM11A	5.675163238	5.703930746	5.668653729	5.549702221	5.796486919	5.539582822	5.676007664	5.822404948	5.775356658	5.712046233	5.585257181	5.479817335			5.786781544	5.61463786	5.625290019	5.619839068	5.618664536	5.756266266	5.632675277	5.590474215	5.580373693	5.553455349	5.432902416	5.450397638
ZNF146	6.87727989	6.569588909	6.363225489	6.548247355	6.637078109	6.669717559	6.317489073	6.734934348	6.52195446	6.532837035	6.550143369	6.566593005			6.170868777	6.050634208	6.296009238	6.056843346	6.032151466	6.115843193	6.460664294	6.254763176	6.337662279	6.231111893	6.33137452	6.299360124
REG4	4.575802893	4.575083476	4.668531973	4.674165658	4.672976353	4.669210836	4.671909376	4.67214456	4.579910968	4.758377372	4.674819923	4.578865217			4.573378088	4.672986662	4.581488511	4.675451203	4.674894505	4.680784654	4.571289567	4.67733381	4.672468385	4.579715888	4.574638121	4.582571142
KIAA1217	4.671521376	4.670696999	4.668531973	4.674165658	4.577072651	4.573786562	4.671909376	4.576346741	4.676228538	4.57829376	4.578681588	4.578865217			4.668742746	4.672986662	4.581488511	4.579232538	4.674894505	4.583887599	4.749471072	4.580875628	4.672468385	4.676005019	4.670186661	4.582571142
KIAA0513	4.830305409	4.829310755	4.826698385	4.902274621	4.832060837	4.752646498	4.899355941	4.831057292	4.835984234	4.833748865	4.758870438	4.903393038			4.826952719	4.756836295	5.030677827	4.835046512	4.903217362	4.765488247	4.892161979	4.837317508	4.756261215	4.9046537	4.75372934	4.839660693
WAPL	7.041599744	6.824002454	6.964039953	6.885509375	6.709510752	6.793369815	6.775077469	6.748689101	6.78824463	6.982560616	6.849595407	7.007735305			6.805008241	6.818077001	6.958673996	6.851542936	7.018714537	6.828814149	6.909943129	6.81827694	6.953065957	7.088861787	6.769814393	7.021186204
BEST1	6.135885392	6.332781563	6.483453856	6.449197386	6.182016899	6.252696868	6.390520446	6.137503957	6.231706225	6.432554941	6.715053614	6.399236727			6.724622549	6.843934603	6.60652702	6.535941651	6.948816225	6.815516516	6.675401988	6.736679763	7.010993389	6.999316215	6.729002433	6.938404041
SLC35F6	6.092171326	6.236991504	6.231180609	6.142749844	6.182016899	6.272102913	6.47657878	6.001615097	6.058800298	6.206396067	6.267819485	6.123255178			6.251432797	6.33908937	6.236509738	6.269518627	6.228158023	6.115843193	6.22531573	6.274582408	6.138344816	6.271008797	6.020375924	6.066466624
ZNF85	4.755210397	4.754295638	4.894986292	4.833495658	4.832060837	4.895864666	4.899355941	4.899660188	4.835984234	4.833748865	4.758870438	4.834538784			4.895259013	4.832073274	4.907280352	4.835046512	4.758953191	4.910834624	4.824064554	4.837317508	4.831447986	4.760185353	4.897127216	4.839660693
JPX	7.426827868	7.36377419	7.373945575	7.452558633	7.371435967	6.989227678	7.436549963	7.647400402	7.646995076	7.596018302	7.463093532	7.007735305			7.097514108	7.089942721	7.159047413	7.279328044	6.657569177	7.125755669	6.823375986	7.412254897	7.288222607	7.252483778	6.536699526	7.00965548
DNAJC14	6.335053583	6.196656428	6.250863503	6.226218423	6.182016899	5.945786036	6.115211934	6.115818467	6.126339959	6.143294316	6.22795958	6.326035119			6.085050321	6.003704005	5.890190414	5.960998245	6.00843371	5.998723366	5.567650881	6.038242996	5.645808616	6.103642086	6.066358242	6.279802187
HILPDA	5.226211339	5.224817412	5.391097239	5.319615918	5.359251073	5.267455142	5.272159431	5.17986539	5.482171416	5.276456696	5.32078794	5.403337706			5.221512266	5.181242373	5.139393123	5.232853712	5.134443588	5.143722048	5.262464373	5.236034308	5.18039492	5.405172167	5.269156525	5.328767218
HNRNPLL	5.178846269	5.177497987	5.016936974	5.133294986	5.023364134	5.073234723	4.962727433	5.07767559	5.186541852	5.081051734	5.362640132	4.967012072			5.124745594	5.274036814	5.189495458	5.321918649	5.026137212	5.414162219	5.068901814	5.13828695	5.273133659	5.027742458	5.223954398	5.284990894
LINS1	6.587446259	5.924394797	6.250863503	5.982479495	5.904326788	6.151160961	6.220209352	6.408836053	6.291122331	6.432554941	6.380721838	6.187416901			5.637815193	5.61463786	5.890190414	5.884080349	5.403082047	5.842398698	5.663897072	5.777854965	5.707839955	6.147519495	6.020375924	6.04308934
CFHR3	4.671521376	4.670696999	4.668531973	4.674165658	4.577072651	4.669210836	4.671909376	4.67214456	4.579910968	4.57829376	4.578681588	4.578865217			4.573378088	4.756836295	4.678036016	4.675451203	4.758953191	4.680784654	4.666349345	4.67733381	4.576629343	4.579715888	4.670186661	4.582571142
ST8SIA4	4.755210397	4.754295638	4.668531973	4.674165658	4.756824857	4.669210836	4.755640931	4.67214456	4.760433352	4.674375544	4.674819923	4.675030326			4.573378088	4.756836295	4.678036016	4.675451203	4.758953191	4.765488247	4.666349345	4.761659666	4.756261215	4.8357146	4.670186661	4.839660693
DNAJB9	6.458694646	6.295286323	6.084509773	6.142749844	6.139663558	6.063875526	6.199868462	6.115818467	6.148098806	6.246849409	6.416342352	6.187416901			6.563866557	6.428641061	6.494052393	6.418111817	6.581855462	6.66014795	6.122433197	6.525128544	6.300116343	6.419663613	5.817865245	6.134178607
CRTAP	7.127517685	7.071779591	7.732535011	7.392933739	7.362605768	7.268043691	7.304882275	7.150232992	7.36460031	7.461587329	7.827097531	7.36059533			7.649941513	7.505757939	7.32524884	7.44854012	7.106804103	6.880769296	7.079149285	7.103936315	6.52732734	6.999316215	7.422302732	7.310779757
METTL26	6.839404581	6.70264792	6.791281642	6.698891327	6.576254086	6.669717559	6.618971572	6.841331787	6.631714431	6.611118237	6.534119878	6.811228652			6.5003993	6.375627299	6.543393466	6.535941651	6.612643612	6.467888929	6.771377643	6.351042989	6.650362628	6.646040619	6.729002433	6.742519494
ZBTB44	5.472919445	5.703930746	5.351075678	5.401709994	5.399470662	5.606661931	5.436220996	5.436673943	5.482171416	5.478530615	5.362640132	5.516200433			5.538626124	5.67835167	5.720112039	5.552325511	5.618664536	5.814347965	5.425505584	5.556165515	5.358317046	5.405172167	5.575632073	5.370827271
ANKRD13C	6.985102935	6.70264792	6.499790925	6.579727904	6.695325374	6.766830279	6.70629957	6.589275006	6.761070921	6.62625198	6.597117496	6.757441861			6.381660369	6.445860183	6.696097529	6.702742576	6.566198069	6.379011042	6.68952774	6.588968695	6.427179725	6.569426176	6.885510083	6.756473498
PHF20L1	5.900846478	5.703930746	5.699149716	5.932771834	5.878224374	5.700649218	5.765584463	5.707125488	5.937748124	5.799691225	5.984087218	6.101150552			5.993168695	5.954995204	6.039995332	5.802153498	5.908911889	5.998723366	5.72400799	5.940412629	6.002418466	6.147519495	5.923161283	6.177448972
SRGAP1	4.575802893	4.575083476	4.668531973	4.674165658	4.577072651	4.669210836	4.576141497	4.576346741	4.579910968	4.57829376	4.578681588	4.578865217			4.573378088	4.672986662	4.678036016	4.579232538	4.578746679	4.583887599	4.571289567	4.580875628	4.576629343	4.579715888	4.574638121	4.582571142
MOXD1	4.755210397	4.829310755	4.894986292	4.75814449	4.832060837	4.895864666	4.830773541	4.899660188	4.835984234	4.902546106	4.834284959	4.903393038			4.958379046	4.900749543	4.907280352	4.903937406	4.966825629	4.910834624	4.749471072	4.906372237	4.96349495	5.027742458	4.897127216	4.839660693
C19orf47	5.129126928	5.224817412	5.173956297	5.183169958	5.228671091	5.175066943	5.226867339	5.07767559	5.279684298	5.183513073	5.184239499	5.134657618			5.124745594	5.274036814	5.189495458	5.185271371	5.231913008	5.193985542	5.305602893	5.325289854	5.273133659	5.136193459	5.269156525	5.03247027
ZNF808	4.755210397	4.829310755	4.826698385	4.75814449	4.832060837	4.752646498	4.755640931	4.831057292	4.835984234	4.833748865	4.758870438	4.759103891			4.752127066	4.756836295	4.762438758	4.835046512	4.758953191	4.680784654	4.824064554	4.761659666	4.756261215	4.8357146	4.75372934	4.679276406
HEATR3	5.900846478	5.99802248	6.149383231	6.246287465	6.117963088	5.945786036	5.901774776	5.927892212	6.148098806	6.07700285	5.959461193	5.743426299			5.814515167	5.76802324	5.863410027	5.830064383	5.743122928	5.869833136	5.72400799	5.556165515	5.677224081	6.058237659	5.897652036	5.810901893
CARD8	9.103487267	9.002854674	8.874921651	8.87175214	9.058422876	8.940039244	9.032483278	8.962840198	9.032316679	8.927264282	9.327683193	9.237465563			8.911785853	9.222374598	9.120483247	8.97830025	8.751662113	8.823529	8.742787841	9.355329277	9.263307641	9.23153034	8.961145414	9.246458191
ARMC10	6.914153272	6.874710966	6.987063224	6.808579891	6.869288532	6.870075801	6.801660396	6.928189314	6.940999562	6.959076845	6.836712883	6.961138534			6.696755323	6.906552977	6.710475936	6.864312007	6.686725161	6.518548226	6.897900689	6.664803082	6.693801425	6.800952269	6.980862287	6.913823578
EPB41	6.135885392	6.044859365	5.867693757	5.881039214	5.851568653	5.670132517	5.644609838	5.902337387	5.912098629	5.982995295	5.772171276	5.801190191			5.868193585	6.161037683	6.063347956	6.124338924	5.882763593	6.955244079	5.862515434	6.129183885	6.049327574	5.911564808	5.702804075	6.111996043
SAR1B	6.475469966	6.112084148	6.231180609	6.3236689	6.202693618	6.213013132	6.179209544	6.280062731	6.291122331	6.246849409	6.36255231	6.344712606			6.191474675	6.095922739	5.890190414	5.857363544	6.078320164	6.046849157	5.913877953	5.888531134	5.877021718	6.231111893	6.215616543	6.356375204
TMEM37	6.492040703	6.176017776	6.398681385	6.098939301	6.282317254	6.272102913	6.240242599	6.280062731	6.058800298	6.226777044	6.22795958	6.00877027			6.399274444	6.512631915	6.236509738	6.345869864	6.581855462	6.48498582	6.409892316	6.440880587	6.803375794	6.189977453	6.349728883	5.970303144
GFOD1	4.898853994	4.829310755	4.958089577	4.965825102	5.023364134	4.895864666	4.899355941	4.755901895	4.835984234	4.833748865	4.903120894	4.903393038			4.958379046	5.181242373	4.971137515	5.08267923	4.966825629	5.034649503	4.892161979	4.97017379	4.756261215	4.8357146	4.82869499	4.97283973
ATF6B	5.975977077	5.99802248	5.944128742	6.006627306	6.003678437	6.129880015	6.093164936	6.137503957	6.126339959	6.030854631	6.078130867	6.187416901			6.016759318	5.547295551	5.967287516	6.102226549	6.122905396	5.973967849	5.752982825	6.014475155	5.877021718	6.011184936	5.897652036	5.893120274
CEP70	4.755210397	4.670696999	4.826698385	4.75814449	4.832060837	4.752646498	4.830773541	4.755901895	4.676228538	4.758377372	4.758870438	4.759103891			4.752127066	4.756836295	4.762438758	4.675451203	4.758953191	4.765488247	4.749471072	4.837317508	4.831447986	4.8357146	4.75372934	4.763814935
SERPINC1	4.671521376	4.670696999	4.751893173	4.75814449	4.756824857	4.752646498	4.671909376	4.67214456	4.579910968	4.758377372	4.758870438	4.675030326			4.668742746	4.672986662	4.678036016	4.759570873	4.758953191	4.765488247	4.666349345	4.67733381	4.672468385	4.676005019	4.75372934	4.763814935
THADA	4.575802893	4.575083476	4.57319416	4.578110585	4.577072651	4.573786562	4.576141497	4.576346741	4.579910968	4.57829376	4.578681588	4.578865217			4.573378088	4.577081647	4.581488511	4.579232538	4.674894505	4.583887599	4.666349345	4.580875628	4.576629343	4.579715888	4.574638121	4.582571142
MTHFSD	4.671521376	4.670696999	4.668531973	4.674165658	4.577072651	4.669210836	4.576141497	4.67214456	4.579910968	4.674375544	4.674819923	4.675030326			4.668742746	4.672986662	4.678036016	4.675451203	4.578746679	4.680784654	4.571289567	4.580875628	4.576629343	4.676005019	4.670186661	4.582571142
RAD51B	5.021260339	4.829310755	4.826698385	5.025083574	4.832060837	4.959021888	4.899355941	4.755901895	4.904942788	4.902546106	4.903120894	4.834538784			4.895259013	4.832073274	4.907280352	4.835046512	4.903217362	4.910834624	4.824064554	4.906372237	4.900079099	4.8357146	4.82869499	4.908884374
PPA2	5.643777661	5.471298024	5.429713635	5.478118123	5.399470662	5.310735353	5.706606546	5.315994494	5.405592794	5.478530615	5.402941657	5.363026837			5.699615317	5.359270028	5.48572119	5.480644295	5.515928306	5.527720859	5.425505584	5.484342289	5.613543597	5.444105384	5.432902416	5.56012582
RGS7	4.575802893	4.670696999	4.668531973	4.578110585	4.672976353	4.669210836	4.576141497	4.67214456	4.579910968	4.57829376	4.674819923	4.675030326			4.668742746	4.577081647	4.678036016	4.579232538	4.674894505	4.583887599	4.666349345	4.67733381	4.672468385	4.676005019	4.897127216	4.679276406
TSC22D4	6.424508367	6.784719505	6.791281642	6.958415767	6.843902749	6.894733291	6.865974611	6.815487018	7.223947804	7.167739929	7.041022245	6.937245232			6.738348293	7.046294382	6.884967784	7.108599134	7.074414225	7.579691751	6.587460717	7.32291998	7.231153956	7.363853526	7.048342342	7.672087185
OSCAR	6.219175292	6.332781563	7.218156259	7.104452771	6.666509513	6.806451654	6.692123733	6.634613481	6.891918207	6.886161884	7.19948582	6.672628628			7.128842461	7.183465839	7.005738291	6.567816597	6.248238598	6.815516516	6.717352804	6.649967114	6.28094056	7.131582161	7.439056368	7.203987937
NAALAD2	4.575802893	4.575083476	4.57319416	4.674165658	4.577072651	4.573786562	4.671909376	4.576346741	4.579910968	4.57829376	4.578681588	4.578865217			4.573378088	4.577081647	4.581488511	4.579232538	4.578746679	4.583887599	4.571289567	4.580875628	4.576629343	4.579715888	4.574638121	4.679276406
PIK3AP1	6.023716927	5.99802248	6.270259205	6.226218423	6.282317254	6.213013132	6.220209352	5.902337387	6.104213286	6.342911647	6.207571398	6.287880062			6.345725648	6.512631915	6.195308885	5.935873456	6.207768632	6.433035159	5.913877953	6.23464411	6.002418466	6.384012296	6.403335252	6.563037018
MINDY3	5.544303408	5.50751358	5.503169792	5.478118123	5.64689776	5.539582822	5.509944966	5.357721561	5.482171416	5.478530615	5.515778871	5.58569397			5.503592782	5.475800624	5.408993433	5.51704363	5.618664536	5.45329702	5.347058047	5.446661785	5.358317046	5.364818036	5.506489885	5.488156325
GHITM	7.973299303	7.964583422	7.985351462	7.999924719	8.045910691	7.888312442	7.903987102	7.886588075	7.949267835	7.900621963	7.926381761	7.945003558			8.052384472	7.877289708	7.925748138	7.87361786	7.902463866	7.848056712	7.919847741	7.796828905	7.899924375	7.936578227	8.073719013	8.035160803
WWC1	4.962194691	5.075484552	5.016936974	4.902274621	5.023364134	5.073234723	4.962727433	5.07767559	4.835984234	4.902546106	5.026029397	4.967012072			4.958379046	5.078950039	5.139393123	4.9675898	5.134443588	4.910834624	5.013779632	5.08552719	5.273133659	5.083517091	4.897127216	5.191521938
ACSM5	4.671521376	4.670696999	4.751893173	4.75814449	4.756824857	4.752646498	4.755640931	4.755901895	4.676228538	4.758377372	4.674819923	4.759103891			4.668742746	4.832073274	4.762438758	4.675451203	4.834374933	4.765488247	4.749471072	4.761659666	4.756261215	4.760185353	4.82869499	4.679276406
LINC00537	5.764705875	5.819048866	5.893689395	5.827087701	5.95497008	5.869303464	5.952369224	5.766116955	5.775356658	5.907671727	5.650849164	5.934858193			5.894194301	5.878248779	5.689327521	5.830064383	6.00843371	5.922969332	5.836024278	5.520814175	6.072159043	5.745602971	5.672257627	5.524702941
GSTCD	5.021260339	5.02006822	4.958089577	5.025083574	5.078934438	5.125483784	5.129738602	4.963050343	4.968656783	4.966113228	4.966723249	5.02633355			5.124745594	4.900749543	4.907280352	5.08267923	5.184361414	5.090745993	5.217463012	5.08552719	5.31657482	4.8357146	5.127022547	4.763814935
CD80	4.830305409	4.754295638	4.668531973	4.75814449	4.756824857	4.827517541	4.830773541	4.831057292	4.835984234	4.966113228	4.834284959	4.759103891			4.752127066	4.832073274	4.762438758	4.759570873	4.834374933	4.765488247	4.666349345	4.837317508	4.756261215	4.9046537	4.75372934	4.839660693
CNNM2	5.435473681	5.50751358	5.173956297	5.276091045	5.274018851	5.267455142	5.315573	5.272569315	5.405592794	5.276456696	5.231786974	5.277597336			5.309895962	5.51210479	5.408993433	5.683711093	5.320921533	5.287615833	5.170384704	5.325289854	5.078165685	5.233789464	5.176663242	5.328767218
OLFM3	4.671521376	4.670696999	4.57319416	4.578110585	4.577072651	4.573786562	4.671909376	4.67214456	4.579910968	4.57829376	4.674819923	4.578865217			4.668742746	4.672986662	4.678036016	4.675451203	4.674894505	4.583887599	4.666349345	4.67733381	4.576629343	4.676005019	4.82869499	4.582571142
VSTM2A	4.671521376	4.575083476	4.668531973	4.578110585	4.577072651	4.669210836	4.671909376	4.67214456	4.676228538	4.57829376	4.674819923	4.675030326			4.668742746	4.672986662	4.581488511	4.579232538	4.674894505	4.680784654	4.666349345	4.67733381	4.672468385	4.676005019	4.574638121	4.679276406
TTC12	5.178846269	5.177497987	5.173956297	5.183169958	5.181225517	5.310735353	5.179480794	5.17986539	5.083855234	5.025386996	5.134326058	5.134657618			5.174301141	5.131436762	5.237220415	5.185271371	5.403082047	5.193985542	5.217463012	5.236034308	5.31657482	5.136193459	5.176663242	5.088465276
C2	4.671521376	4.670696999	4.668531973	4.674165658	4.672976353	4.573786562	4.671909376	4.67214456	4.676228538	4.57829376	4.674819923	4.578865217			4.668742746	4.672986662	4.678036016	4.675451203	4.674894505	4.680784654	4.666349345	4.67733381	4.576629343	4.676005019	4.670186661	4.679276406
DPYD	5.611543697	5.703930746	5.699149716	5.799210667	5.767999907	5.670132517	5.676007664	5.707125488	5.5539113	5.771166046	5.682338706	5.772647173			5.729367494	5.904351439	5.779441691	5.619839068	5.800879291	5.814347965	5.781288159	5.748569239	5.953732007	5.803420853	5.702804075	5.782243552
TMEM126B	4.898853994	5.02006822	5.016936974	4.902274621	5.131420513	5.125483784	5.129738602	5.07767559	4.968656783	5.081051734	4.966723249	4.967012072			5.01724184	5.023379039	5.086589317	5.026941938	5.026137212	5.090745993	5.013779632	5.08552719	5.18039492	5.186176547	5.176663242	4.839660693
RHOF	5.396730309	5.433885652	5.309517974	5.401709994	5.399470662	5.352324918	5.509944966	5.474144933	5.323310776	5.36182334	5.32078794	5.277597336			5.221512266	5.399490075	5.282831612	5.404129882	5.44196831	5.373596428	5.498788233	5.446661785	5.707839955	5.621007329	5.506489885	5.450397638
DNAH14	4.671521376	4.575083476	4.57319416	4.674165658	4.577072651	4.573786562	4.576141497	4.576346741	4.579910968	4.57829376	4.578681588	4.578865217			4.573378088	4.577081647	4.678036016	4.675451203	4.578746679	4.583887599	4.571289567	4.580875628	4.672468385	4.676005019	4.670186661	4.582571142
GPRIN2	4.962194691	4.961062731	4.894986292	4.965825102	4.900736207	4.959021888	5.021821388	4.963050343	4.904942788	4.966113228	4.903120894	4.903393038			4.958379046	5.078950039	5.086589317	4.9675898	5.026137212	4.974909316	5.013779632	5.08552719	5.02262968	4.9046537	4.897127216	4.908884374
SLC25A48	5.021260339	4.829310755	4.894986292	4.965825102	4.96419236	4.959021888	5.021821388	4.963050343	4.904942788	4.966113228	5.026029397	4.967012072			4.958379046	4.964206513	4.971137515	4.9675898	4.903217362	5.034649503	5.120970451	4.97017379	5.078165685	5.027742458	4.82869499	4.97283973
SPAG9	5.314877587	5.54261949	5.391097239	5.514467843	5.475780357	5.310735353	5.077319638	5.315994494	5.323310776	5.550130578	5.402941657	5.321164816			5.605672533	5.581450289	5.808066406	5.830064383	6.078320164	6.159893423	5.752982825	5.687802188	5.978306672	5.937209136	5.127022547	5.866309455
MBP	8.220802794	8.283937666	7.75926422	8.445792551	8.351151513	8.059467603	8.147764954	8.383128905	7.919342025	8.176967248	8.18860017	8.440631011			8.046977284	7.794710212	8.422051079	7.987364523	8.682532252	8.732600837	8.344265117	8.680987477	8.540023158	8.643548224	8.48416014	8.788212487
APOBEC4	4.755210397	4.754295638	4.751893173	4.75814449	4.756824857	4.752646498	4.755640931	4.755901895	4.676228538	4.758377372	4.834284959	4.834538784			4.752127066	4.672986662	4.762438758	4.759570873	4.834374933	4.841479839	4.666349345	4.761659666	4.831447986	4.760185353	4.75372934	4.679276406
FAM13C	4.671521376	4.575083476	4.668531973	4.674165658	4.577072651	4.669210836	4.671909376	4.576346741	4.579910968	4.57829376	4.578681588	4.675030326			4.668742746	4.577081647	4.581488511	4.675451203	4.674894505	4.583887599	4.666349345	4.580875628	4.672468385	4.579715888	4.670186661	4.582571142
WDR20	5.021260339	5.127827214	4.894986292	5.133294986	5.131420513	5.017918872	5.077319638	5.022161454	5.083855234	5.081051734	5.081724113	4.967012072			5.072526028	4.964206513	5.086589317	5.27833044	5.134443588	5.331466187	4.95509176	5.08552719	4.756261215	5.186176547	4.897127216	5.239315252
CFAP97	4.575802893	4.670696999	4.57319416	4.578110585	4.577072651	4.573786562	4.576141497	4.67214456	4.579910968	4.57829376	4.578681588	4.578865217			4.573378088	4.577081647	4.581488511	4.579232538	4.674894505	4.583887599	4.666349345	4.580875628	4.576629343	4.579715888	4.574638121	4.679276406
YIF1B	6.458694646	6.155050656	6.381070056	6.205840851	6.282317254	6.233003382	6.336122563	6.137503957	6.169502869	6.143294316	6.451048294	6.123255178			6.270831711	6.202720906	6.296009238	6.229639004	6.122905396	6.159893423	6.122433197	5.777854965	6.09459615	6.147519495	6.274751942	6.177448972
SETD6	6.647546448	6.404769679	6.416065864	6.449197386	6.462833971	6.610991561	6.442808809	6.510207227	6.646701345	6.32424337	6.398649606	6.72974495			6.016759318	6.182044016	6.389646199	6.614279328	6.055441421	6.263979012	6.264326849	6.332333192	5.90311196	6.231111893	6.403335252	6.514242606
ATP11B	5.314877587	4.897787478	5.016936974	5.08073415	5.131420513	5.073234723	5.077319638	4.963050343	5.028065533	5.133625759	4.966723249	5.02633355			5.221512266	5.228688517	5.189495458	5.135320824	5.026137212	5.090745993	5.013779632	5.281608998	5.02262968	5.136193459	4.897127216	4.97283973
DCAF5	4.575802893	4.575083476	4.57319416	4.674165658	4.577072651	4.573786562	4.671909376	4.576346741	4.579910968	4.57829376	4.758870438	4.578865217			4.668742746	4.577081647	4.581488511	4.675451203	4.674894505	4.583887599	4.571289567	4.67733381	4.576629343	4.676005019	4.670186661	4.679276406
GPR62	5.544303408	5.471298024	5.572191568	5.361437534	5.512084125	5.539582822	5.676007664	5.22726495	5.365228746	5.402105126	5.515778871	5.403337706			5.572629907	5.646919862	5.448012409	5.552325511	5.515928306	5.756266266	5.694326353	5.590474215	5.795323212	5.553455349	5.394215697	5.370827271
PGM5	4.671521376	4.670696999	4.668531973	4.578110585	4.672976353	4.669210836	4.671909376	4.67214456	4.676228538	4.57829376	4.578681588	4.675030326			4.668742746	4.672986662	4.678036016	4.675451203	4.758953191	4.680784654	4.666349345	4.67733381	4.672468385	4.676005019	4.75372934	4.679276406
SPPL3	5.178846269	5.395177263	5.266271351	5.361437534	5.317485076	5.431022032	5.357289055	5.315994494	5.365228746	5.36182334	5.277230825	5.363026837			5.309895962	5.51210479	5.448012409	5.363800328	5.277360745	5.45329702	5.262464373	5.281608998	5.227812396	5.444105384	5.354120326	5.450397638
KCTD17	5.578406099	5.54261949	5.699149716	5.827087701	5.614616095	5.700649218	5.676007664	5.545576107	5.482171416	5.584334578	5.618507166	5.516200433			5.729367494	5.796510534	5.689327521	5.619839068	5.800879291	5.785648807	5.836024278	5.590474215	5.795323212	5.684914848	5.79009334	5.56012582
DYNLRB1	4.671521376	4.670696999	4.668531973	4.674165658	4.672976353	4.669210836	4.671909376	4.67214456	4.676228538	4.674375544	4.674819923	4.675030326			4.668742746	4.756836295	4.678036016	4.675451203	4.758953191	4.680784654	4.749471072	4.837317508	4.672468385	4.760185353	4.82869499	4.679276406
CELF2	7.007975544	6.784719505	6.904767128	6.795334191	7.023917843	6.857581525	6.788432582	6.866705293	6.87937337	6.970867975	6.972270153	7.041693706			6.953052849	7.079157068	7.040027578	6.95056481	7.159183905	7.423819591	6.797620226	7.037795609	7.022296959	7.318509198	7.003718388	7.272873011
APBB1IP	6.278372961	6.70264792	6.326809626	6.414507764	6.560616866	6.435156605	6.279425095	6.35515187	6.455030777	6.397409345	6.416342352	6.485488146			6.624519576	6.544828718	6.696097529	6.864312007	6.862590499	6.867961071	6.443950877	6.81827694	6.392082828	6.55357569	6.255331052	6.610150852
SUV39H2	5.544303408	5.471298024	5.266271351	5.230681282	5.438275719	5.431022032	5.357289055	5.397904141	5.444535456	5.402105126	5.32078794	5.363026837			5.430119888	5.274036814	5.448012409	5.321918649	5.36277721	5.241861901	5.386982099	5.325289854	5.18039492	5.364818036	5.608724085	5.41132636
CYB5R3	6.407085879	6.630321056	6.345141007	6.516024494	6.243102064	6.086250589	6.557509341	6.299233724	6.329312219	6.266623055	6.534119878	6.643158253			6.433827987	6.262881846	6.389646199	6.382474886	6.451259239	6.360511157	6.122433197	6.254763176	6.201348807	6.347392239	6.367835843	6.374854555
BPNT1	5.314877587	5.313399888	5.173956297	5.183169958	5.228671091	5.175066943	5.272159431	5.17986539	5.234167106	5.276456696	5.184239499	5.277597336			5.221512266	5.181242373	5.030677827	5.185271371	5.134443588	5.193985542	5.170384704	5.188348072	5.18039492	5.136193459	5.269156525	5.239315252
ETV4	5.021260339	5.02006822	4.894986292	5.025083574	4.96419236	5.017918872	5.077319638	5.07767559	5.083855234	5.025386996	4.966723249	4.967012072			4.958379046	5.023379039	5.030677827	5.026941938	5.026137212	5.034649503	5.068901814	5.029663003	4.96349495	5.083517091	5.019330183	4.97283973
PSMD10	7.865902717	7.753587077	7.939404656	7.818352263	7.846053778	7.832702939	7.885751649	7.910852553	7.863845965	7.81262346	7.883790255	7.83425073			7.706035758	7.568425541	7.645891353	7.614738901	7.635050222	7.595148317	7.683818271	7.591002233	7.725958967	7.69654926	7.897844215	7.79033691
ZNF70	5.705750319	5.846226641	5.699149716	5.741494725	5.767999907	5.700649218	5.765584463	5.612859804	5.746102027	5.741963639	5.742956335	5.909236417			5.814515167	5.796510534	5.750136231	5.773599022	5.908911889	5.726162192	5.862515434	5.806460621	6.026086224	5.858659557	5.732598711	5.660391662
MYO18B	4.671521376	4.754295638	4.826698385	4.75814449	4.756824857	4.752646498	4.755640931	4.755901895	4.760433352	4.758377372	4.758870438	4.759103891			4.752127066	4.756836295	4.678036016	4.759570873	4.674894505	4.765488247	4.824064554	4.761659666	4.756261215	4.676005019	4.75372934	4.763814935
ETFBKMT	5.021260339	5.075484552	5.124413185	5.133294986	5.078934438	5.267455142	5.077319638	5.13010935	5.186541852	5.183513073	5.134326058	5.184583429			5.072526028	5.228688517	5.086589317	5.27833044	5.081836958	5.373596428	5.120970451	5.188348072	5.18039492	5.136193459	5.269156525	5.03247027
DRC3	5.178846269	5.075484552	5.266271351	5.08073415	5.078934438	5.125483784	5.021821388	5.022161454	5.323310776	5.183513073	5.134326058	5.134657618			5.072526028	5.228688517	5.139393123	5.185271371	5.184361414	5.090745993	5.120970451	5.281608998	5.474781659	5.083517091	5.019330183	5.141346844
RHOBTB2	5.675163238	5.733740373	5.668653729	5.680916057	5.678329243	5.842741071	5.579212308	5.510416531	5.5539113	5.51488844	5.618507166	5.551466769			5.669112897	5.738860055	5.750136231	5.552325511	5.800879291	5.331466187	5.836024278	5.718565495	5.546237355	5.715637972	5.575632073	5.594503102
TTC30B	5.129126928	4.897787478	4.826698385	4.965825102	4.900736207	4.827517541	4.899355941	4.899660188	4.968656783	4.902546106	5.081724113	4.903393038			4.895259013	4.832073274	4.971137515	4.903937406	4.834374933	4.974909316	4.749471072	4.906372237	4.900079099	4.9046537	4.897127216	5.03247027
LENG9	4.830305409	4.829310755	4.894986292	4.833495658	4.832060837	4.895864666	4.899355941	4.831057292	4.904942788	4.902546106	4.834284959	4.834538784			4.958379046	4.900749543	4.907280352	4.835046512	4.834374933	4.765488247	4.892161979	4.906372237	4.756261215	4.8357146	4.897127216	4.839660693
PCAT4	5.129126928	5.313399888	5.221155733	5.276091045	5.438275719	5.638819991	5.612363146	5.510416531	5.323310776	5.402105126	5.515778871	5.516200433			5.605672533	5.438295569	5.48572119	5.619839068	5.743122928	5.527720859	5.808958171	5.590474215	5.823155468	5.621007329	5.506489885	5.141346844
SLC1A6	4.575802893	4.575083476	4.668531973	4.578110585	4.577072651	4.752646498	4.671909376	4.576346741	4.579910968	4.57829376	4.578681588	4.578865217			4.573378088	4.577081647	4.581488511	4.579232538	4.578746679	4.583887599	4.666349345	4.67733381	4.576629343	4.579715888	4.670186661	4.582571142
ARHGAP27	4.830305409	5.02006822	5.016936974	5.025083574	4.96419236	5.073234723	4.899355941	5.07767559	5.186541852	5.025386996	5.134326058	4.903393038			5.072526028	5.317503549	5.368549262	5.08267923	5.184361414	5.414162219	5.013779632	5.281608998	5.078165685	5.937209136	4.960361946	5.141346844
SYMPK	7.127517685	7.185975858	7.338801477	7.43577692	7.362605768	7.435737626	7.376622833	7.341994199	7.253219336	7.313093418	7.179359292	7.268446879			6.964709436	7.213310461	7.095378721	7.353051217	7.189702046	6.867961071	6.823375986	7.14636314	6.929206508	7.067004976	7.317400401	7.310779757
LIG3	6.353426432	6.236991504	6.363225489	6.266057868	6.462833971	6.365117494	6.279425095	6.460468016	6.488904154	6.266623055	6.36255231	6.344712606			6.251432797	6.095922739	6.315266938	6.229639004	6.306723988	6.263979012	6.033877295	6.129183885	6.180680559	6.147519495	6.454894241	6.563037018
LMNA	5.472919445	5.703930746	5.503169792	5.361437534	5.181225517	5.267455142	5.765584463	5.676519456	5.279684298	5.231035996	5.882587162	5.516200433			5.699615317	5.317503549	5.55759732	5.714417451	5.743122928	5.45329702	5.462741452	5.407672444	5.227812396	5.444105384	5.269156525	5.488156325
NKAIN2	4.671521376	4.670696999	4.751893173	4.75814449	4.756824857	4.669210836	4.671909376	4.67214456	4.676228538	4.674375544	4.674819923	4.675030326			4.668742746	4.672986662	4.762438758	4.675451203	4.758953191	4.680784654	4.824064554	4.761659666	4.672468385	4.676005019	4.75372934	4.679276406
RBM8A	7.137897682	7.254108558	6.904767128	7.410226508	7.489614843	7.161023031	7.075687656	6.692829643	7.319251497	6.80922299	7.06321073	6.863010571			7.450692877	7.553015445	7.792661026	7.715657508	7.520258618	7.706019914	7.210930731	7.479882358	7.369729826	7.450411518	7.335432149	7.243761035
MBTPS2	5.129126928	5.075484552	5.072206902	5.025083574	5.023364134	5.125483784	5.077319638	5.13010935	5.136545634	5.081051734	5.026029397	5.082042457			5.072526028	5.131436762	5.086589317	5.135320824	5.081836958	5.090745993	5.013779632	5.13828695	5.130619815	5.136193459	5.019330183	5.088465276
CEP120	5.314877587	5.355059147	5.124413185	5.08073415	5.131420513	5.267455142	5.179480794	5.13010935	5.234167106	5.081051734	5.184239499	5.551466769			5.072526028	5.131436762	5.237220415	5.135320824	5.134443588	5.143722048	5.120970451	5.188348072	4.900079099	5.083517091	5.019330183	5.141346844
CNKSR2	4.898853994	4.670696999	4.751893173	4.674165658	4.756824857	4.669210836	4.671909376	4.755901895	4.835984234	4.674375544	4.674819923	4.834538784			4.668742746	4.672986662	4.838164539	4.675451203	4.674894505	4.765488247	4.824064554	4.67733381	4.672468385	4.760185353	4.670186661	4.763814935
TGOLN2	7.476535086	8.075567165	7.560702606	7.69015463	7.635743469	8.38089733	7.564718622	8.289255732	7.792955731	8.329431266	7.656680619	7.552250913			7.569020668	7.598754272	7.638511143	7.722600003	7.685610993	7.540299961	7.690738025	7.867745107	7.352018034	7.586443831	7.396795597	7.574547086
LOC100287896	5.705750319	5.609802316	5.503169792	5.549702221	5.547274504	5.638819991	5.579212308	5.510416531	5.685400618	5.68137247	5.441824765	5.618951112			5.309895962	5.228688517	5.448012409	5.51704363	5.479550448	5.491116316	5.217463012	5.556165515	5.273133659	5.518153022	5.354120326	5.488156325
ANKMY1	4.962194691	4.897787478	4.958089577	4.965825102	4.96419236	4.959021888	4.962727433	4.963050343	4.968656783	5.025386996	5.026029397	4.967012072			5.01724184	4.832073274	4.971137515	4.9675898	5.026137212	5.143722048	5.120970451	5.029663003	4.96349495	4.968349985	5.019330183	4.97283973
RUBCN	4.898853994	4.897787478	4.894986292	4.965825102	4.96419236	4.752646498	4.830773541	4.899660188	5.028065533	4.966113228	4.903120894	4.967012072			4.895259013	4.900749543	4.971137515	4.903937406	4.834374933	4.910834624	4.892161979	4.837317508	4.96349495	4.9046537	5.074712018	4.97283973
PTBP2	4.755210397	4.829310755	4.826698385	4.833495658	4.832060837	4.827517541	5.077319638	4.963050343	4.904942788	4.833748865	4.966723249	4.903393038			4.752127066	4.832073274	4.971137515	4.759570873	4.758953191	4.841479839	4.824064554	4.837317508	4.756261215	4.9046537	4.82869499	4.908884374
SERPINB8	5.544303408	5.609802316	5.503169792	5.478118123	5.547274504	5.606661931	5.509944966	5.510416531	5.365228746	5.51488844	5.618507166	5.479817335			5.758410422	5.67835167	5.55759732	5.480644295	5.713190354	5.527720859	5.694326353	5.446661785	5.766850073	5.621007329	5.470294105	5.370827271
AGFG2	5.435473681	5.270046201	5.221155733	5.361437534	5.228671091	5.175066943	5.272159431	5.357721561	5.365228746	5.478530615	5.32078794	5.363026837			5.35146356	5.274036814	5.282831612	5.321918649	5.44196831	5.090745993	5.386982099	5.325289854	5.273133659	5.186176547	5.269156525	5.239315252
MBLAC2	4.575802893	4.575083476	4.57319416	4.578110585	4.577072651	4.573786562	4.671909376	4.576346741	4.676228538	4.674375544	4.674819923	4.675030326			4.573378088	4.577081647	4.581488511	4.579232538	4.578746679	4.583887599	4.571289567	4.580875628	4.576629343	4.579715888	4.574638121	4.679276406
DGKE	4.755210397	4.829310755	4.751893173	4.75814449	4.756824857	4.752646498	4.755640931	4.755901895	4.760433352	4.758377372	4.758870438	4.759103891			4.752127066	4.832073274	4.762438758	4.759570873	4.903217362	4.765488247	4.749471072	4.761659666	4.756261215	4.760185353	4.82869499	4.839660693
SIRPB1	5.675163238	5.54261949	6.170313134	6.3236689	6.182016899	6.01793201	5.736451746	6.115818467	5.859182544	6.099476133	6.287310509	6.05578349			6.624519576	6.709541766	6.710475936	6.308238935	6.550359453	6.774842332	6.283411645	6.54137026	6.511139777	7.022243873	6.215616543	7.110173802
BCL6B	5.178846269	5.075484552	5.124413185	5.230681282	5.131420513	5.125483784	5.226867339	5.07767559	5.234167106	5.133625759	5.134326058	5.184583429			5.174301141	5.274036814	5.139393123	5.185271371	5.231913008	5.193985542	5.068901814	5.367259387	5.474781659	5.279295022	5.127022547	5.03247027
ASCC1	7.007975544	6.674171052	6.623893414	6.72713894	6.804933967	6.501750108	6.633916377	6.589275006	6.853939817	6.641220877	6.416342352	6.485488146			6.51654503	6.637108646	6.621866334	6.583479829	6.468285423	6.397260316	6.477174375	6.369495807	6.427179725	6.690040551	6.55248752	6.578922309
ZNF57	5.314877587	5.127827214	5.124413185	5.133294986	5.131420513	5.310735353	5.077319638	5.22726495	5.323310776	5.276456696	5.277230825	5.321164816			5.174301141	5.131436762	4.971137515	5.135320824	4.966825629	4.910834624	5.013779632	4.97017379	4.900079099	5.186176547	4.960361946	5.03247027
EPHA7	4.575802893	4.575083476	4.57319416	4.578110585	4.577072651	4.573786562	4.576141497	4.576346741	4.579910968	4.57829376	4.578681588	4.578865217			4.573378088	4.672986662	4.581488511	4.579232538	4.578746679	4.583887599	4.571289567	4.580875628	4.576629343	4.760185353	4.574638121	4.582571142
MYT1L	4.755210397	4.670696999	4.668531973	4.578110585	4.672976353	4.573786562	4.671909376	4.67214456	4.760433352	4.57829376	4.674819923	4.675030326			4.668742746	4.672986662	4.678036016	4.579232538	4.578746679	4.680784654	4.666349345	4.761659666	4.672468385	4.676005019	4.574638121	4.763814935
PDS5B	4.671521376	4.670696999	4.57319416	4.578110585	4.577072651	4.573786562	4.671909376	4.576346741	4.579910968	4.57829376	4.578681588	4.578865217			4.573378088	4.577081647	4.581488511	4.675451203	4.578746679	4.583887599	4.666349345	4.67733381	4.672468385	4.579715888	4.670186661	4.582571142
NPAS3	5.076732377	5.02006822	4.958089577	4.902274621	4.96419236	4.895864666	4.830773541	4.899660188	4.968656783	4.966113228	4.903120894	4.903393038			5.01724184	5.023379039	4.907280352	4.9675898	4.966825629	5.090745993	4.892161979	4.906372237	4.900079099	4.9046537	4.960361946	4.908884374
CBFA2T2	5.848159234	6.196656428	5.992644947	6.098939301	6.073449602	6.192716302	5.976931653	6.240873023	6.169502869	6.143294316	5.934350579	6.187416901			5.841642826	5.738860055	5.967287516	6.146083846	6.00843371	5.726162192	5.888458397	5.990260354	5.677224081	5.774851309	6.066358242	6.019281744
ZFYVE16	5.314877587	5.355059147	5.429713635	5.319615918	5.438275719	5.267455142	5.315573	5.474144933	5.482171416	5.550130578	5.585257181	5.442229714			5.467453006	5.438295569	5.326546993	5.552325511	5.515928306	6.138053314	5.425505584	5.556165515	5.437297567	5.621007329	5.394215697	5.660391662
TET3	5.226211339	5.355059147	5.391097239	5.319615918	5.317485076	5.267455142	5.315573	5.272569315	5.323310776	5.319991913	5.32078794	5.277597336			5.266638909	5.317503549	5.408993433	5.363800328	5.44196831	5.414162219	5.425505584	5.367259387	5.358317046	5.322910499	5.176663242	5.284990894
RNF32	5.509166926	5.433885652	5.605226979	5.514467843	5.475780357	5.573603287	5.706606546	5.579700943	5.518600723	5.584334578	5.618507166	5.479817335			5.503592782	5.581450289	5.625290019	5.619839068	5.85606051	5.491116316	5.533732514	5.623809594	5.766850073	5.587717059	5.672257627	5.488156325
RGS11	4.671521376	4.575083476	4.57319416	4.674165658	4.672976353	4.669210836	4.671909376	4.67214456	4.579910968	4.674375544	4.674819923	4.578865217			4.668742746	4.756836295	4.678036016	4.675451203	4.674894505	4.680784654	4.571289567	4.67733381	4.672468385	4.676005019	4.574638121	4.679276406
OSBPL1A	4.898853994	4.961062731	4.894986292	4.902274621	4.96419236	4.959021888	4.899355941	4.899660188	4.904942788	4.902546106	4.903120894	4.834538784			5.01724184	5.023379039	4.971137515	4.9675898	4.903217362	4.841479839	5.013779632	4.906372237	5.130619815	4.968349985	4.897127216	4.839660693
DUOXA1	4.830305409	4.670696999	4.826698385	4.75814449	4.756824857	4.752646498	4.830773541	4.755901895	4.760433352	4.674375544	4.674819923	4.834538784			4.826952719	4.832073274	4.762438758	4.759570873	4.758953191	4.680784654	4.824064554	4.761659666	4.756261215	4.760185353	4.75372934	4.763814935
MAST4	4.962194691	5.02006822	5.016936974	4.833495658	4.96419236	5.125483784	5.021821388	4.963050343	4.904942788	5.025386996	4.903120894	4.967012072			5.072526028	5.078950039	5.030677827	5.026941938	4.903217362	4.910834624	5.217463012	5.13828695	4.96349495	4.9046537	5.074712018	5.03247027
RPRML	5.076732377	5.02006822	5.124413185	5.025083574	5.078934438	5.125483784	5.179480794	5.022161454	5.083855234	5.133625759	4.966723249	5.134657618			5.124745594	5.078950039	5.086589317	5.026941938	5.081836958	5.090745993	5.068901814	5.08552719	5.02262968	5.083517091	4.960361946	4.908884374
CFAP61	5.021260339	5.02006822	4.958089577	5.08073415	5.023364134	5.073234723	4.962727433	4.963050343	4.968656783	5.025386996	5.081724113	4.967012072			5.174301141	4.832073274	5.030677827	5.026941938	5.081836958	4.974909316	5.013779632	5.029663003	5.02262968	4.968349985	5.074712018	4.97283973
NEK4	5.396730309	5.177497987	5.173956297	5.133294986	5.078934438	5.267455142	5.129738602	5.022161454	5.186541852	5.183513073	5.081724113	5.082042457			5.124745594	5.181242373	5.139393123	5.27833044	5.081836958	5.193985542	5.262464373	5.188348072	5.437297567	5.083517091	4.960361946	5.141346844
CNST	5.975977077	5.819048866	5.605226979	5.932771834	5.678329243	5.573603287	5.736451746	5.736977583	5.685400618	5.51488844	5.515778871	5.551466769			5.894194301	5.76802324	5.967287516	5.910241939	5.828775524	5.726162192	5.836024278	5.590474215	5.546237355	5.715637972	5.506489885	5.660391662
NUMA1	6.258931807	4.829310755	6.964039953	6.431963689	4.832060837	7.045203867	4.830773541	6.67850454	4.760433352	4.758377372	4.834284959	6.613042743			4.752127066	5.131436762	4.838164539	6.146083846	6.207768632	5.331466187	5.217463012	6.313358657	4.756261215	6.718612996	5.761682624	4.839660693
NAIF1	4.962194691	5.02006822	4.894986292	4.965825102	4.832060837	4.895864666	5.021821388	4.899660188	4.904942788	5.025386996	4.903120894	4.903393038			5.01724184	4.900749543	4.971137515	5.026941938	5.026137212	4.974909316	4.892161979	5.029663003	4.96349495	4.968349985	4.897127216	5.088465276
ZNF586	4.755210397	4.670696999	4.751893173	4.75814449	4.832060837	4.752646498	4.830773541	4.831057292	4.835984234	4.833748865	4.758870438	4.759103891			4.668742746	4.756836295	4.762438758	4.759570873	4.758953191	4.765488247	4.749471072	4.761659666	4.756261215	4.968349985	4.75372934	4.839660693
LOC100130950	4.962194691	5.224817412	4.958089577	5.133294986	5.131420513	5.22230402	5.129738602	5.22726495	5.136545634	5.231035996	5.184239499	5.082042457			5.221512266	5.317503549	5.030677827	5.185271371	5.320921533	5.193985542	5.217463012	5.281608998	5.31657482	5.186176547	5.019330183	5.141346844
METTL8	6.760410859	6.538182259	6.638644923	6.640599687	6.161010743	6.501750108	6.734222232	6.815487018	6.554222763	6.822345223	6.207571398	6.566593005			6.289952216	6.223079328	6.352971141	6.469866389	6.122905396	6.397260316	6.409892316	6.54137026	6.049327574	6.210704523	6.215616543	6.625502597
FAM151A	4.830305409	4.829310755	4.826698385	4.75814449	4.756824857	4.752646498	4.899355941	4.67214456	4.676228538	4.833748865	4.758870438	4.675030326			4.895259013	4.832073274	4.838164539	4.835046512	4.758953191	4.765488247	4.824064554	4.761659666	4.96349495	4.760185353	4.75372934	4.679276406
GGA1	6.258931807	6.538182259	6.363225489	6.579727904	6.496214277	6.400591259	6.317489073	6.589275006	6.646701345	6.611118237	6.534119878	6.502099675			6.289952216	6.637108646	6.807147091	6.79926149	6.657569177	6.732938957	6.22531573	6.88279524	6.374186059	6.600587097	5.996755356	6.625502597
[truncated: 18,817 more rows]
