# Supplementary material for: Spatial Transcriptomic Analysis Using R-Based Computational Machine Learning Reveals the Genetic Profile of Yang or Yin Deficiency Syndrome in Chinese Medicine Theory
Source: Evid Based Complement Alternat Med. 2022 Mar 16;2022:5503181. doi: 10.1155/2022/5503181 (PMC8942619; doi:10.1155/2022/5503181)
Supplement: Supplementary Materials — Supplementary Data 1: normalized data set of GSE87474 by DESeq-2 in R. Supplementary Data 2: the value of module eigengenes of filtered genes in the Yang deficiency group. Supplementary Data 3: the value of module eigengenes of filtered genes in the Yin deficiency group. [file 5503181.f1.zip › 5503181.f1/supplementary data 2.txt]

GeneSymbol	ModuleColors	MEblue	MEbrown	MEgrey	MEturquoise	MEyellow
NEXN	blue	0.672902301	-0.321556378	0.068683421	0.095837441	-0.441426665
CRYZL1	blue	0.505218983	0.114380819	0.372288222	-0.02451476	0.073441386
CLEC12A	blue	0.543028024	0.118668186	0.086503799	-0.004795178	-0.174735982
CLEC4F	blue	0.289248925	0.120384524	-0.145619392	0.18350702	0.129446783
LACTB	blue	0.511913219	0.190140018	-0.064107773	0.293358375	0.064473299
NLRC4	blue	0.740177832	-0.60613839	-0.143530692	0.303137874	-0.483478928
TRNT1	blue	0.831159391	-0.570415848	0.146962528	-0.124328891	-0.587816332
RICTOR	blue	-0.656427301	0.228845731	0.350339429	0.518588134	0.673278225
CD300LF	blue	0.757090417	-0.43427888	-0.286317314	0.29240614	-0.437859013
LSM14B	blue	0.40194073	-0.320178173	-0.160465726	0.139678206	-0.346771346
POLE4	blue	0.921912393	-0.225319506	-0.086523552	-0.32383099	-0.645713104
FGD2	blue	0.90113382	-0.317007054	-0.135413073	-0.420133165	-0.730894579
HP1BP3	blue	0.430886932	0.245113687	-0.126247006	-0.205912348	-0.086480384
LINS1	blue	0.391977251	-0.527367263	0.451536391	0.351438853	-0.128975343
CRTAP	blue	0.791981813	0.286817678	0.057784128	-0.304994988	-0.177190456
CARD8	blue	0.081747695	-0.143422749	0.208018845	0.319486165	0.258457052
OSCAR	blue	0.862076823	-0.230827126	-0.171984505	0.171276315	-0.367663441
S100Z	blue	0.940599122	-0.136573369	0.197213762	-0.156262027	-0.397255183
FCER1G	blue	0.664603249	-0.141671026	0.023773458	0.227960644	-0.098984683
IDH1	blue	0.939762993	-0.244216348	-0.04347329	-0.167145919	-0.540204774
NAGA	blue	0.926378817	-0.28114073	-0.127458467	-0.362191326	-0.654681026
MS4A4A	blue	0.572279486	-0.278544879	-0.155802455	0.053730034	-0.294539049
THUMPD3-AS1	blue	0.508990697	-0.195775742	0.401663822	0.162246699	-0.097845548
CUTALP	blue	-0.55844527	0.206748089	0.525652668	0.055652385	0.534314724
TCAIM	blue	0.565217537	-0.016329873	0.566201569	-0.115901954	-0.060787373
CBX3	blue	0.366142751	0.324884826	0.416252453	-0.234497601	0.058067359
LINC01138	blue	0.580085865	-0.394674579	0.582350232	0.070654538	-0.259979004
MTMR11	blue	0.959722272	-0.420773452	0.059666946	-0.049195114	-0.58144863
ZNF207	blue	0.624725508	0.191869166	0.362508715	0.000794616	0.020562003
LOC389906	blue	-0.459532729	0.627211938	0.168566543	-0.366607008	0.399676386
SRGAP2	blue	0.735204158	0.273889825	0.203260178	0.112318273	0.096802928
COTL1	blue	0.593810929	0.350354304	0.03247184	0.329618021	0.319312026
YPEL2	blue	0.555626772	0.420362838	0.021808392	0.038590612	0.068758842
VASH1	blue	0.778232175	-0.442810277	-0.096101442	0.16500806	-0.560898383
LINC01210	blue	-0.554957799	0.276554245	-0.302113327	-0.393011227	0.079558496
SPATA13	blue	-0.501189871	0.090433682	0.408607111	-0.059871716	0.328129871
EML4	blue	-0.251855376	0.231285063	0.428372439	-0.192843507	0.250632394
HCG11	blue	0.521609796	0.062991946	0.224366312	0.443473231	0.148165518
TPR	blue	-0.505872989	-0.100973517	0.594366429	0.460096661	0.44316462
WHAMMP2	blue	-0.547207525	0.402676562	-0.239558981	-0.444790073	0.092370054
PHLDB3	blue	-0.482182003	0.444707794	0.435737453	-0.1898836	0.347909758
LOC441081	blue	0.457848768	0.251782029	-0.193879492	0.047916938	-0.039169609
FTX	blue	-0.240522309	0.098421099	0.60295484	-0.274145571	0.141258403
PAXIP1-AS2	blue	0.797428827	-0.255883898	0.158147155	0.275166982	-0.240957256
VNN1	blue	0.426029513	-0.084002335	-0.076204585	0.407009397	0.022929261
SPATA24	blue	-0.609295402	0.426549077	-0.399719864	-0.380267236	0.113082825
LOC101928307	blue	0.688743065	-0.056993089	0.264541859	-0.408803501	-0.31422074
ZNF664	blue	0.34261193	0.060880455	0.307387661	0.278113223	0.14142806
LINC00565	blue	-0.697105099	0.384880688	-0.131230059	0.019355099	0.27502618
FOXP1	blue	-0.700917877	0.631992082	0.341169492	0.024062897	0.739430578
PTPRE	blue	-0.718998513	0.304735606	-0.128780689	0.561413853	0.681783616
CGAS	blue	0.52107297	-0.436482892	-0.546590554	0.158126139	-0.483970379
ZCCHC10	blue	0.384914038	0.18079502	0.626054385	0.158783565	0.247659579
C16orf54	blue	-0.708699484	0.482021903	-0.040605446	0.412979956	0.78236263
LINC01410	blue	0.612215339	0.044166552	-0.315457198	0.101709419	-0.242407005
SAMHD1	blue	0.514149186	0.469806259	0.427198043	-0.148199529	0.289205003
WDFY2	blue	0.628333156	0.024954456	0.455129312	-0.211547368	-0.176225643
CMTM7	blue	0.376115728	-0.098731981	0.743552573	-0.059637251	-0.016056074
LOC101927166	blue	-0.905107746	0.282390871	0.107362357	-0.157160151	0.431867872
ZNF578	blue	0.50270298	-0.442375913	-0.40596718	0.181996783	-0.521107332
DDX6	blue	-0.48232282	0.38249977	0.003963578	-0.306086177	0.191181285
OSBP	blue	-0.657712696	0.558465529	0.277978958	0.339969853	0.765507374
AATBC	blue	0.833991593	-0.212782649	-0.008651392	-0.048951061	-0.335405622
CAST	blue	0.669938642	0.088851069	0.062074148	-0.173053536	-0.137931016
A2M-AS1	blue	0.513594266	-0.406566372	0.357686646	-0.003531833	-0.189260213
DTHD1	blue	0.259263319	-0.545562447	0.344738643	0.079710576	-0.331458689
LINC00491	blue	-0.486858286	-0.00892042	-0.444796035	-0.460260445	-0.277767173
MGST1	blue	0.664736582	0.448518057	0.093069222	-0.217387802	-0.027724029
NUDT16L2P	blue	0.521709139	-0.029527576	-0.064102696	0.383660073	0.11196448
ITPRIPL2	blue	0.868657749	-0.410109059	0.168739038	-0.155392293	-0.550506809
FKBP15	blue	0.724767856	-0.198172405	0.296279172	-0.133691026	-0.276786799
IRAK3	blue	0.454735596	0.493672624	0.276482054	-0.164393934	0.186627649
SLC24A4	blue	0.910140078	-0.037065385	-0.003619175	-0.14208983	-0.361603583
ZFYVE28	blue	0.158157695	-0.232919087	0.401485787	0.195413942	0.036696259
RAB7A	blue	0.359569517	-0.599222722	-0.133320719	-0.016118592	-0.719598874
PSMB2	blue	0.656612572	-0.720425048	-0.205808692	-0.305039646	-0.848414991
AP2B1	blue	0.151437024	0.025676494	-0.284219569	-0.208802009	-0.11558547
WARS1	blue	0.673207926	-0.522098277	-0.207213237	0.199528431	-0.42086593
GRN	blue	0.934619403	-0.260181165	-0.22546329	-0.243020865	-0.621248027
KDELR2	blue	0.694087803	-0.428491777	-0.311638191	-0.185243595	-0.685513074
NPC2	blue	0.943336352	-0.353442471	-0.030918523	-0.076638053	-0.557436813
FKBP1A	blue	0.630265507	0.389504568	-0.011991524	0.057823911	0.094415973
ACADVL	blue	0.737028741	-0.266128899	0.099355713	-0.473581641	-0.641445554
GPX1	blue	0.698615348	0.182410959	0.017171209	-0.108667017	-0.25281226
DPYSL2	blue	0.764945239	0.11895508	0.002190125	-0.501193897	-0.369580594
CTSD	blue	0.870266795	0.116866463	0.044138658	-0.041235506	-0.224523302
MAT2A	blue	0.752524154	-0.259780899	0.424385604	-0.349865584	-0.468781466
ANXA5	blue	0.903680762	-0.223839843	-0.076014147	-0.310928401	-0.536680682
GSTP1	blue	0.933809437	-0.07330063	0.012353886	-0.291825112	-0.457011607
CTSB	blue	0.881414517	-0.181346074	-0.290022445	-0.213942586	-0.556635797
PSAP	blue	0.906142948	-0.221592522	-0.010322099	-0.334944679	-0.564465448
RPL31	blue	0.305788296	0.347126208	0.365078043	-0.177412578	0.101800056
ABLIM1	blue	-0.591319958	0.428784305	0.299505092	-0.379479569	0.320688129
CKAP4	blue	0.369334177	0.309496796	-0.606165521	0.222644176	0.052635677
CYC1	blue	0.824611894	-0.228757845	-0.030723128	-0.459703677	-0.647557201
SON	blue	0.27824049	0.414151814	0.137268415	-0.00421043	0.194567723
LGALS1	blue	0.885251881	-0.337356731	0.030372454	-0.310822679	-0.614534937
GPX4	blue	0.366336367	0.328520809	0.168548879	-0.187406161	-0.050885686
HLA-DPB1	blue	0.770969582	-0.393795456	0.286405	-0.501488435	-0.659989923
PKM	blue	0.784604455	0.024374821	0.014442939	-0.466535461	-0.495951992
CST3	blue	0.91072174	-0.265930259	-0.126320706	-0.368807217	-0.667773191
MGST3	blue	0.709726192	-0.418016497	0.175560667	-0.165056456	-0.495447669
ALDH2	blue	0.813171456	-0.23463452	-0.206958912	-0.453679367	-0.699059742
JUN	blue	-0.327896432	0.611134827	-0.271490077	-0.41101266	0.200418628
TGFBI	blue	0.818436288	0.004650116	-0.112876172	-0.498452136	-0.520137374
SAMM50	blue	0.547084478	-0.166229181	0.436927993	-0.309098709	-0.41315396
SCARB2	blue	0.873691064	-0.282439579	-0.21954606	0.045872808	-0.410293265
TIMP1	blue	0.515070851	-0.266948973	0.196948214	-0.242842694	-0.387702833
EGR1	blue	-0.553518509	-0.012350294	-0.365465566	0.304518523	0.193552911
CD14	blue	0.8717536	-0.375098421	-0.245132531	-0.179984346	-0.675485749
MTHFD2	blue	0.78899304	-0.415979673	-0.273003728	0.12846663	-0.437191785
SNRPA	blue	0.508631089	0.079404213	0.219022625	-0.465659645	-0.310214101
MYOF	blue	0.823918766	-0.426258467	-0.188710771	-0.04792866	-0.552286331
CAPG	blue	0.851650949	-0.239199569	-0.020561393	-0.406997855	-0.609418044
PON2	blue	0.564215742	0.160875173	0.135457794	-0.13114996	-0.115099378
UQCRC1	blue	0.872980535	-0.234569472	-0.078655177	-0.473323759	-0.652708848
RPS4Y1	blue	0.463579566	-0.58431184	-0.03412197	0.128921041	-0.511969286
PRDX4	blue	0.645160373	-0.640097568	0.362879372	0.036092197	-0.443442759
CDK2AP1	blue	0.694782327	-0.071317925	-0.117842636	-0.050923217	-0.227997765
HEXB	blue	0.945749358	-0.306421999	-0.04927292	-0.255009777	-0.648477201
ST14	blue	0.857901301	-0.157545339	-0.068678885	-0.136173033	-0.512255486
LTF	blue	0.66186471	-0.413314201	-0.110669811	0.044053599	-0.516912368
ALDH3A2	blue	0.757877794	-0.293657748	-0.383416245	-0.406964655	-0.741654465
CTSL	blue	0.668662384	-0.313678036	-0.005063837	-0.224916698	-0.444047005
TSPO	blue	0.815358751	-0.126872025	0.009303095	-0.303950269	-0.541594058
PEPD	blue	0.807413081	0.066904478	0.014393867	-0.440320108	-0.469770701
LY6E	blue	0.524734169	-0.182439097	0.282670833	-0.275494178	-0.214004743
BLVRB	blue	0.650725953	0.211466645	-0.159220551	0.127666182	-0.079099759
TRIB1	blue	-0.515519899	0.486103729	-0.264530772	0.500632974	0.641222175
HSD17B10	blue	0.755262116	-0.300511469	0.256459485	-0.391708065	-0.592167278
CTSH	blue	0.7679479	-0.074619682	0.056858788	-0.618775774	-0.580695078
BCR	blue	-0.358222821	0.095557809	0.4253775	-0.013289288	0.267482637
NR4A1	blue	-0.388849948	-0.014173431	-0.384698418	0.005423827	0.145659774
TCEAL4	blue	0.616413033	0.224284076	0.052132315	-0.044771691	-0.12833622
PRKCD	blue	0.730480614	-0.164906583	0.006239056	0.56237757	-0.005165374
EPS8	blue	0.607354303	0.154365338	0.379589104	0.081484671	0.122779135
ITM2A	blue	-0.527232291	0.480787159	0.080404564	-0.178345276	0.471351449
GET1	blue	0.771429026	-0.234617134	0.179400896	0.382296973	-0.099161093
HEXIM1	blue	-0.668991817	-0.342815523	-0.001679256	0.344888671	0.219244808
FUCA1	blue	0.88710708	-0.088582074	-0.162752937	-0.159951367	-0.494652489
TAF15	blue	0.658040997	-0.390822047	0.029354966	-0.073809396	-0.39519023
OAS1	blue	0.724706389	-0.069733137	-0.006310778	-0.146251315	-0.203511524
CD93	blue	0.816738583	-0.362068936	-0.195487416	0.310970368	-0.34480592
BIN1	blue	-0.397501236	-0.18374323	0.271228884	0.096158872	0.064026321
HK2	blue	0.572025358	-0.285629041	-0.251783516	0.281537499	-0.172884152
RRP7A	blue	0.707696441	-0.128426538	0.391894276	-0.431473366	-0.381073809
GSTA4	blue	0.318047324	-0.50869898	-0.011335442	-0.21497107	-0.645300425
IMPA1	blue	-0.442264994	-0.24812338	0.040235307	0.206160433	0.040974099
FBLN5	blue	-0.527058308	0.178097406	0.241742317	0.399593861	0.525494982
CSF1R	blue	0.889840118	-0.14744128	0.021297576	-0.290578638	-0.473366896
SPTLC2	blue	0.856262417	0.080115507	-0.131433383	-0.065769099	-0.257371027
DAPK1	blue	0.796770992	-0.241536348	-0.255140333	0.166171242	-0.393142934
ST3GAL5	blue	0.640110395	-0.337194917	0.238943471	-0.532077978	-0.504647795
LGALS9	blue	0.695477784	0.012417	-0.303956834	0.090205889	-0.22437711
ITGB1BP1	blue	-0.275980417	-0.078669493	0.523191412	-0.193113274	0.100701917
EZH2	blue	0.628026426	-0.262656307	0.18284471	0.121452757	-0.172986281
HEBP2	blue	0.436559185	0.020415799	-0.171163093	0.222745351	-0.033273062
RTN1	blue	0.797686224	-0.258182607	0.264790637	-0.091973113	-0.458609686
ZNF185	blue	0.610714107	-0.290235238	-0.180043905	0.062963059	-0.506824591
SULT1A1	blue	0.663197577	-0.218208634	-0.136503575	0.104747007	-0.314631674
CD163	blue	0.790439695	0.187257626	-0.066305281	-0.289093777	-0.226538315
CTSF	blue	-0.707095347	0.290007476	0.34513636	-0.301033057	0.354932436
HMOX1	blue	0.820747403	-0.180998601	0.081427045	-0.233645068	-0.374148556
CEACAM6	blue	0.568646121	-0.600450668	0.021355786	0.239977715	-0.453891588
BLVRA	blue	0.757390926	-0.022044576	0.171739265	-0.372799509	-0.278294275
SLC25A13	blue	0.800331737	-0.033075946	0.230474991	0.186720058	-0.052082298
NQO2	blue	-0.159085766	-0.012460591	0.068071086	0.04835073	-0.00891921
HBEGF	blue	-0.260517271	0.190918988	-0.365211585	-0.047042409	0.162412721
RGS3	blue	0.371938818	-0.729816889	-0.013331102	0.161014911	-0.548549444
DNASE1L1	blue	0.96017416	-0.21012826	0.058107122	-0.188311919	-0.524208218
CYBB	blue	0.941063111	-0.382704356	-0.090125541	-0.224900932	-0.670427005
HLA-DMB	blue	0.812813313	-0.135165143	-0.14669591	-0.220493711	-0.580516485
E2F6	blue	0.728141524	-0.255918806	-0.064100614	0.113279377	-0.291467169
SLC31A1	blue	0.797900415	-0.382508522	-0.35633075	0.0169682	-0.543557193
PUDP	blue	0.496104441	0.050180934	-0.185891868	-0.436946313	-0.357626711
CEBPA	blue	0.7773366	-0.047188824	-0.314154459	-0.440864041	-0.558152649
WASF3	blue	0.338520521	-0.54679938	0.1634555	0.149368316	-0.462802606
PRKX	blue	-0.206716402	0.579126712	0.230825161	-0.176799102	0.481958807
AGAP1	blue	-0.29479194	-0.261129629	0.486202852	-0.094792166	0.103842993
P2RX4	blue	0.768679177	-0.210052123	0.230848902	-0.241363943	-0.406147296
SMARCD3	blue	0.882519071	0.068710008	-0.065702645	-0.078431482	-0.30682042
TUBB2A	blue	-0.227502563	-0.214064365	0.240057713	0.095747786	0.105876486
ENPP4	blue	-0.525024957	-0.176502723	0.571439213	0.251448941	0.301079813
MGST2	blue	0.68205275	-0.448124313	0.014665933	-0.055025026	-0.596463234
GRK3	blue	0.9448525	-0.088557825	0.03549198	-0.079921806	-0.357835449
SLC31A2	blue	0.700781262	-0.244068493	-0.033543794	0.183594079	-0.189851727
RAB32	blue	0.881978198	-0.087255385	-0.202885995	-0.156920224	-0.524544044
LMO2	blue	0.857502835	-0.229932767	-0.019670306	0.077181639	-0.406635986
KBTBD11	blue	0.816655593	-0.428929361	0.296992329	0.114241273	-0.403223399
S100P	blue	0.557056592	-0.181228011	-0.338102068	0.275583	-0.315715019
KYNU	blue	0.695161846	-0.372932758	-0.41779376	-0.055325639	-0.639289684
ACP3	blue	0.455168206	0.570557117	-0.1753438	-0.209061573	0.015084343
KCNN4	blue	0.216433815	-0.238982815	-0.060711464	0.211021982	-0.112102725
EIF1AY	blue	0.356092843	-0.48263754	-0.01671742	0.219922103	-0.359208455
ADCY9	blue	0.61958296	-0.228035142	0.32104233	0.012236139	-0.170657284
TBC1D8	blue	0.857073463	-0.304297973	-0.273496913	-0.166779112	-0.544081052
CXCL10	blue	0.60444898	-0.064241511	-0.151950988	0.166266851	-0.159508289
FKBP5	blue	0.859057609	-0.115073802	0.012761044	-0.123916486	-0.423654125
SLC7A7	blue	0.967678223	-0.234684969	-0.135354565	-0.088067432	-0.495823218
VCAN	blue	0.6422506	0.385247891	0.050626311	-0.437407132	-0.134241662
HHEX	blue	0.896375856	-0.362177056	0.070232726	-0.037144014	-0.55952367
F5	blue	0.630390162	-0.26684094	-0.664724599	0.018312318	-0.590680973
MAL	blue	-0.585246443	0.483646209	0.300008774	-0.242071903	0.35078223
DUSP2	blue	-0.649437928	0.361571856	-0.146106904	-0.327133962	0.215412301
FGL2	blue	0.5836022	-0.590511176	-0.308401299	0.465639322	-0.374734596
TYMP	blue	0.768758816	0.017598297	0.00127172	0.337166348	-0.030904496
NAIP	blue	0.487452175	-0.124794478	0.151404362	0.377511131	-0.037846152
CSTA	blue	0.846015601	-0.159176897	-0.038023716	-0.026619415	-0.401771871
NMT2	blue	-0.499634415	0.416581026	0.233533251	0.18022515	0.656530773
VRK2	blue	0.792823102	-0.445890036	-0.054451653	0.144505271	-0.414432005
RNASE4	blue	0.719462515	-0.099623885	-0.041854	-0.169776614	-0.298658134
ITGB3BP	blue	0.434962543	-0.067160383	0.205213581	-0.131148836	-0.278483301
RPH3A	blue	0.542871369	0.349358202	-0.114192392	-0.189924866	-0.071237455
FCN1	blue	0.828221841	-0.094158694	-0.072787632	-0.49783677	-0.580302197
SCO2	blue	0.778594038	-0.290778566	-0.116454076	0.29915471	-0.296998351
EGR2	blue	-0.675720234	-0.16835293	-0.322734704	0.078316241	0.091630972
GNA15	blue	0.78611275	0.180920762	-0.057310702	-0.178772315	-0.258538675
CBR3	blue	-0.386658918	0.434008163	0.248306636	-0.0467061	0.457951704
CFD	blue	0.760301327	-0.237398259	-0.337436235	0.115291665	-0.409788273
FES	blue	0.652608661	-0.461004419	0.022565647	0.336434961	-0.387667008
AP1B1	blue	0.583011356	0.305433666	-0.079635334	-0.149142702	-0.135492671
DIAPH2	blue	0.907847669	-0.073550219	0.117126254	-0.198096767	-0.347489084
LY75	blue	-0.656792487	0.375870246	0.260914892	0.179003936	0.636725894
CD86	blue	0.929077573	-0.216706175	-0.15486878	-0.178006192	-0.519260412
BST1	blue	0.521025969	-0.295725761	-0.459573611	0.296787563	-0.336281329
CD8A	blue	-0.606865149	-0.083800977	0.437277939	0.09530455	0.352786568
CD1D	blue	0.847350139	-0.383633044	-0.348834116	-0.291972491	-0.731638278
MARCO	blue	0.719369724	-0.129411738	0.164515341	-0.34064103	-0.437844302
LY86	blue	0.778821734	-0.065923946	0.097809082	-0.543263537	-0.482182242
ZBTB16	blue	0.802896217	0.058655476	0.059681952	0.26467381	-0.076513895
MICA	blue	0.443646231	0.001224145	-0.416803075	0.117859413	-0.239577092
HK3	blue	0.749832773	-0.36766965	-0.131811005	-0.493638516	-0.731430866
IL15	blue	0.841778343	-0.121625308	-0.0064739	-0.036142928	-0.344221379
CASP1	blue	0.811281828	-0.323659658	0.057077661	0.369890479	-0.216010445
RNASE2	blue	0.738590816	-0.275502047	-0.065913636	-0.040448418	-0.410544841
EGR3	blue	-0.634215119	0.313463352	-0.161694595	0.59672565	0.639266585
CD33	blue	0.960390145	-0.160575492	-0.153703228	-0.184356316	-0.523258904
ASGR2	blue	0.792715387	-0.001651873	0.088388016	-0.395491134	-0.365934134
CD27	blue	-0.540944325	0.504995486	0.246020612	-0.256464474	0.327973704
CLC	blue	-0.382941804	0.055378113	0.274598248	0.117948195	0.3230335
PLA2G7	blue	0.721548409	0.169042957	-0.080163244	0.05076443	-0.03398009
NRG1	blue	0.70942294	0.149109944	-0.25946645	0.071415555	-0.058905686
PRKY	blue	0.494626743	-0.515992385	0.001481061	0.17413267	-0.42170002
CD36	blue	0.738614488	-0.028958241	-0.096066695	-0.571055903	-0.592568546
MIS18BP1	blue	0.705452173	0.321201886	0.157322498	-0.031259791	0.084942007
GLB1L	blue	0.404293415	-0.598040702	0.129204751	0.26074537	-0.341163191
CD28	blue	-0.62622131	0.59692878	0.340215888	-0.212442913	0.597300006
GFI1	blue	-0.280725518	-0.417940575	-0.218625274	0.387681163	0.01690852
USP9Y	blue	0.437395595	-0.562177807	-0.012355279	0.203206908	-0.431267133
FLT3	blue	0.757595524	0.038680022	-0.131997771	-0.008593284	-0.218302293
CEACAM8	blue	0.572662019	-0.55974024	0.127642532	0.238691204	-0.402812965
KDM5D	blue	0.486021901	-0.618407439	-0.030802506	0.141005789	-0.526343169
FOXN2	blue	0.608983307	-0.199013104	-0.318782779	-0.30635597	-0.600042936
EPB41L3	blue	0.909184812	-0.150914852	-0.1506652	0.010703367	-0.408736174
TFEC	blue	0.961013456	-0.151357636	-0.048083239	-0.247311547	-0.533795986
ASGR1	blue	0.972912696	-0.329587368	0.032217209	-0.249650669	-0.619285239
RNASE3	blue	0.53195254	-0.455552313	0.170238859	0.246894795	-0.263292635
NLRP3	blue	0.515903685	0.144675143	-0.699330333	-0.063279116	-0.245241765
P2RX7	blue	0.664879172	-0.000599606	0.085280807	-0.471663287	-0.469017138
LTK	blue	-0.342905859	0.240561648	0.404256671	-0.33164019	0.141949097
ADGRE1	blue	0.604396537	0.24339345	-0.037052696	-0.030786645	0.126148263
SULT1A2	blue	0.702712736	-0.249794028	-0.10818909	0.081640622	-0.354084532
DEFA4	blue	0.602165849	-0.58094379	0.071179346	0.038225264	-0.553797406
CD300C	blue	0.751303039	-0.387911702	-0.088382703	-0.295957032	-0.635172549
PGLYRP1	blue	0.383869326	-0.486958704	-0.056774185	0.591947141	-0.112660273
GZMM	blue	-0.562760739	0.076781333	0.307771434	0.217475458	0.406313169
ATP5MC3	blue	0.710698735	-0.29947012	-0.07863776	-0.484705823	-0.658397823
LILRB2	blue	0.746199575	-0.298753163	-0.149998067	0.316069548	-0.230998879
NINL	blue	-0.241220453	-0.131507954	-0.261433023	-0.088496416	-0.205421581
METTL7A	blue	0.759220609	-0.011251169	-0.092508705	-0.627354078	-0.628913427
CRISP3	blue	0.33045225	-0.317197701	0.085191208	0.491318221	-0.024192445
LILRA1	blue	0.844005136	-0.181778868	0.000782561	0.244467181	-0.192645611
UTY	blue	0.551101971	-0.593386098	-0.093723734	-0.049504249	-0.684561426
TMX1	blue	0.703753209	-0.386539071	-0.363979851	-0.042615755	-0.552906516
TBXAS1	blue	0.838246628	-0.303495034	-0.139562772	0.283703259	-0.300042481
CPVL	blue	0.919309462	-0.240124227	0.060064339	-0.337640713	-0.596026378
DDX11	blue	-0.436782277	-0.056354123	0.22876456	-0.243897842	-0.078237041
DDX17	blue	0.318770023	-0.220979607	0.358732642	0.508274337	0.198518856
APLP2	blue	0.887050903	-0.032080251	-0.157215858	-0.263867214	-0.489935759
RNPEP	blue	0.764323804	-0.0243473	-0.32794461	-0.321561819	-0.489102983
FGR	blue	0.811594213	-0.472655764	-0.375513374	0.025897779	-0.670045534
LGALS2	blue	0.519631867	0.134814118	-0.145869786	-0.228164247	-0.162526031
XPNPEP1	blue	0.663623326	-0.156195984	0.219821455	0.460302388	0.035335418
GATAD1	blue	0.758540281	0.031468989	0.063215042	-0.194010429	-0.289675396
CD24	blue	0.494768567	-0.119103411	0.173126073	0.082633976	-0.221719512
OXA1L	blue	0.835082073	-0.133957032	0.090145349	-0.429572915	-0.526647535
LTA4H	blue	0.764026806	-0.158401991	0.039765065	-0.197259437	-0.403649465
GOLGA8A	blue	-0.337465313	0.261495982	0.734480653	-0.119994146	0.384920879
COMT	blue	0.86832601	-0.027755357	0.011060998	-0.296129354	-0.44184558
PLXNB2	blue	0.876428839	-0.049860152	0.083696038	-0.392702219	-0.459948005
DUSP6	blue	0.488057543	0.224624517	-0.053670234	-0.01943964	0.068343131
HLA-DRA	blue	0.905392774	-0.230369204	-0.03944428	-0.2519874	-0.601801451
CYFIP1	blue	0.889065558	-0.171893947	-0.236734482	-0.277268173	-0.63665911
PLIN2	blue	0.592848141	0.06426977	-0.175360589	-0.540771188	-0.375280969
IGLC1	blue	-0.430677926	0.064003518	-0.196388554	0.26004002	0.242497494
PRPF4	blue	0.75067842	-0.741080556	0.014345201	0.060883694	-0.662526935
MAN2B1	blue	0.813670996	-0.127302831	0.183968835	-0.363478923	-0.50331647
TUBB6	blue	0.440447137	0.149627329	0.344746028	-0.144540762	0.017660039
CBR1	blue	0.780018475	-0.493678929	0.004746126	-0.063341687	-0.635568754
CA2	blue	0.488160463	0.417858368	-0.02257456	-0.19939712	-0.107822264
H1-2	blue	-0.63908788	0.33160352	0.318257587	0.476790849	0.628623396
IFI35	blue	0.477848342	-0.53510175	-0.195177228	0.33239795	-0.325633377
PLAAT3	blue	0.605820367	-0.449264007	-0.326693826	-0.00267215	-0.55020468
TRAC	blue	-0.694004047	0.255957359	0.248190079	-0.309083788	0.334454136
RIN2	blue	0.84044808	-0.470382788	0.048136436	-0.109274429	-0.508144701
FBP1	blue	0.920336457	-0.204874956	-0.260260562	-0.112417423	-0.545812013
NKX3-1	blue	-0.496907704	-0.00547994	-0.160061287	0.026944781	0.222471909
NCKAP1L	blue	0.79001716	-0.350286632	-0.221769419	-0.009522843	-0.452631757
BTN3A2	blue	-0.424417998	0.331540784	-0.262372827	-0.279744409	0.015051289
APBA2	blue	-0.785446334	0.571825031	0.189045749	-0.045265383	0.59543298
TCL1A	blue	0.326657857	0.110371376	0.03637594	-0.240063221	-0.16305253
CTSZ	blue	0.813545413	-0.277584931	-0.464794947	-0.230367018	-0.620574018
TLR5	blue	0.870695441	-0.36376348	-0.293564292	0.00522414	-0.577685267
CAMP	blue	0.523580604	-0.453424303	-0.275185895	0.251926546	-0.432867684
TNFSF13	blue	0.864111498	-0.34607411	-0.018740649	-0.443298559	-0.695080022
IFNG	blue	-0.370696297	-0.000333665	-0.160080596	0.077348083	0.144874325
P2RX1	blue	0.527418445	0.097375582	0.014045051	0.482834318	0.221626394
VEGFA	blue	0.687202065	0.250146071	-0.157927062	0.231766052	0.019113768
SIGLEC9	blue	0.727076657	-0.514160617	-0.04628999	0.498873161	-0.316308803
TP53I3	blue	0.836879945	-0.137007275	-0.047820284	-0.481078786	-0.571172884
TNFRSF25	blue	-0.62375591	0.365378233	0.335152149	-0.15480902	0.427937699
KIR2DL1	blue	-0.248679339	-0.149843105	0.692105682	0.019343665	0.222556528
CAPN3	blue	0.777184725	-0.104980773	0.285934749	0.054685769	-0.166582199
KIR3DS1	blue	0.549851417	-0.208862682	0.251301741	0.264299896	0.04160355
IGHG1	blue	0.192543207	-0.019396561	-0.115718069	0.333831164	0.078467226
IGLJ3	blue	-0.21507155	0.245530668	-0.040988107	0.172810621	0.259651918
KCTD12	blue	0.897969458	-0.386918727	-0.224418425	-0.154808506	-0.662709462
ALDH1A1	blue	0.718452761	0.202600499	-0.27218637	-0.289643	-0.364396379
SERPINB1	blue	0.701695647	-0.449827724	-0.292064826	-0.107926143	-0.678933169
FAM102A	blue	-0.626757034	0.41564161	0.323339946	-0.306279686	0.35757179
KIAA0930	blue	0.868772055	-0.562221562	-0.173469961	0.095565047	-0.583009879
SPTSSA	blue	0.825668293	-0.054731995	0.03922266	0.178170496	-0.134570844
MXRA7	blue	-0.448192853	-0.297314793	0.317896804	0.130095385	0.108705004
LCN2	blue	0.60697396	-0.319786182	-0.121066666	0.353164457	-0.264772568
TMEM259	blue	0.579479043	0.124148268	0.227752667	0.478195986	0.244940091
JCHAIN	blue	-0.445727583	0.126308557	-0.13883374	0.296206231	0.372062687
NME4	blue	0.556720614	-0.084984547	0.1439524	-0.248592348	-0.339412631
TCF7L2	blue	0.834870579	-0.07292591	-0.059274385	0.030819893	-0.228562399
OLFM4	blue	0.681984044	-0.776989116	-0.0134507	0.116745474	-0.67033798
WASHC4	blue	0.716390873	0.097507984	-0.240374006	0.307711719	-0.041664375
DMXL2	blue	0.583123347	0.368787978	-0.210624338	0.286852203	0.226249434
PPFIBP2	blue	0.54225745	0.005442403	-0.302309002	-0.356471836	-0.328446009
SAMD4A	blue	0.746315085	-0.38452376	0.190165388	0.128854982	-0.318756994
SLC30A1	blue	0.829610424	-0.628372632	-0.232261405	0.04441819	-0.628161389
TBC1D9	blue	0.483529463	-0.392874096	-0.291622311	-0.225220536	-0.539956876
NACC2	blue	0.871875644	-0.501744916	0.024867792	0.156020489	-0.470474027
CDKN1C	blue	0.329167541	-0.023328027	0.28921508	0.250485001	0.278588653
SASH1	blue	0.680401125	0.038399942	-0.326039746	-0.191409935	-0.31811519
DHRS1	blue	0.808409211	-0.36948102	0.085896915	-0.335814927	-0.661369674
RAP1GAP2	blue	0.42744141	-0.55692531	0.296180637	0.418966188	-0.175417131
COQ2	blue	0.831886607	-0.620486257	-0.198198439	-0.118306765	-0.744711362
ZNF184	blue	0.427640482	-0.066899614	0.228652453	0.54848872	0.252491043
GUSBP11	blue	-0.389662556	0.074118286	-0.07542314	0.178853562	0.201333924
GLCE	blue	0.739862804	-0.449052609	0.244958087	0.334411395	-0.2624228
RNASE6	blue	0.573536486	-0.240486441	-0.137409767	0.325377486	-0.279376708
CLMN	blue	0.782695951	0.149623641	0.119803062	-0.316401121	-0.228827699
MYCL	blue	0.852768934	-0.296171525	0.119495109	-0.118042061	-0.483384247
TXLNGY	blue	0.375208693	-0.497888241	-0.043826113	0.143785739	-0.436606278
TKTL1	blue	0.372887232	-0.005888151	-0.484595119	0.074362216	-0.276586952
XIST	blue	-0.443581932	0.601063183	0.049918505	-0.181343551	0.497713017
KLRB1	blue	-0.371943033	0.019145534	0.497466724	-0.304801588	0.056767998
MYO1C	blue	-0.868773063	0.521293364	0.058896449	-0.026750576	0.660718116
ZNF266	blue	0.528279593	-0.25831735	0.49289794	-0.164832667	-0.300524358
ZNF394	blue	-0.715788349	0.703935057	0.113237012	0.229263983	0.840488976
NAAA	blue	0.772322213	-0.033064804	-0.170699	-0.318550098	-0.388441708
IGHD	blue	-0.289327997	0.10680458	0.077735972	-0.004787523	0.133089134
FNBP1L	blue	0.510895714	-0.696078783	0.116089646	0.148421434	-0.590463417
RRN3P1	blue	0.564657788	0.097060045	0.621112292	0.103353086	0.129294687
KIAA0754	blue	0.491315344	0.015655989	0.304616406	0.240820558	0.160460588
BEX4	blue	0.344650245	0.218426519	0.026921286	-0.088624752	-0.181484893
PTGDR	blue	0.268740146	-0.268142692	0.31672673	0.06266615	-0.25776929
IGLL3P	blue	-0.477408643	0.07374451	-0.169522734	0.200334002	0.235964274
TRAT1	blue	-0.411310537	0.032139524	-0.022762743	-0.012607084	0.247100112
BTNL3	blue	-0.804935494	0.511856664	0.139815985	-0.136529138	0.553298929
HLA-DMA	blue	0.805624468	-0.092968248	-0.055887235	-0.561849689	-0.650192482
MILR1	blue	0.702847567	0.085825737	-0.24976772	-0.046562663	-0.3087784
CHCHD2	blue	0.457944673	-0.223922271	-0.02707487	-0.199295613	-0.386824585
ADI1	blue	0.450863212	0.118226839	0.181159494	-0.00527412	-0.019721096
SNX5	blue	0.777966244	-0.61382145	-0.012514909	-0.262906043	-0.707258546
TNS3	blue	0.951325617	-0.159258754	-0.191083275	-0.192941618	-0.547422058
CYBRD1	blue	0.532098877	-0.034022162	-0.299126144	0.137147393	-0.174379484
FXYD6	blue	0.852663415	-0.277116796	-0.447136089	-0.243403218	-0.6675691
LAP3	blue	0.803807203	-0.088735569	0.034961931	0.295814488	-0.099864331
PHLDA1	blue	-0.550779271	0.408628996	0.090971655	0.138599202	0.537936557
TSPYL2	blue	-0.763321085	0.658962496	0.195876529	-0.299712009	0.494790041
MRPL15	blue	0.816403752	-0.533677923	0.0192279	-0.321088374	-0.747432842
COMMD9	blue	0.882999007	-0.11337258	-0.005009496	-0.381266804	-0.567517624
TIMM13	blue	0.667257782	-0.363832913	0.142620148	-0.318203302	-0.570024622
POLR1D	blue	0.677364772	-0.132847518	0.157380132	-0.523317354	-0.533214786
PDP1	blue	0.800850574	-0.457875283	0.045579326	-0.482532851	-0.797817749
TRAPPC2L	blue	0.626747386	-0.257100367	0.293670811	-0.471533942	-0.501713783
ROGDI	blue	0.645456465	-0.354300669	0.006186825	-0.167017591	-0.596534286
PLBD1	blue	0.83077962	-0.281069509	-0.449878792	0.154008333	-0.49467677
SLC35A5	blue	0.740945225	-0.392501557	0.067066065	0.238201918	-0.359634186
MRS2	blue	0.753017567	-0.372883486	0.479134268	0.170059305	-0.217596414
RMDN1	blue	0.570069614	-0.150882737	0.05661764	0.208715902	-0.115999151
NIT2	blue	0.436724534	-0.265378693	0.532653065	-0.294774651	-0.405251938
MAFB	blue	0.721834162	-0.266551553	-0.164715866	-0.191896585	-0.41240129
LYRM4	blue	0.446543094	0.11301376	0.315137749	-0.466259047	-0.274537998
NUDT2	blue	0.455073817	0.007059777	0.289486841	-0.294456694	-0.219064084
PCTP	blue	0.764040166	-0.347295072	-0.063028178	0.406328821	-0.343275529
LACTB2	blue	0.490610702	0.041701975	0.254512463	0.414388537	0.143642606
GRAMD2B	blue	0.631397017	-0.212297232	0.273159837	-0.127237412	-0.424374631
PDGFC	blue	0.561836209	0.393205681	0.275117608	-0.173126954	0.017633336
SIDT2	blue	0.527870041	0.006489282	0.156928132	-0.116416036	-0.016241022
ARRB1	blue	0.660587473	-0.280691729	0.229496412	0.518633899	0.006592792
POLR3K	blue	0.77132663	-0.643193956	0.157132159	-0.174405231	-0.634097941
TESC	blue	0.663680872	-0.478411924	-0.083374757	0.34304532	-0.283852142
TPPP3	blue	0.508836633	0.075975837	-0.333130044	-0.119055945	-0.141069851
NETO2	blue	0.815328415	-0.441929503	0.027187328	0.112459713	-0.505773721
PTER	blue	0.483361556	-0.41655376	0.534021531	0.021121116	-0.346422453
NUP43	blue	0.474692093	-0.075679855	0.791225083	0.099415665	0.158563546
ETNK1	blue	0.651535052	-0.517390959	-0.103946252	0.453879729	-0.25553995
OPN3	blue	0.74184745	0.17466495	-0.111873094	-0.319114352	-0.328715217
PARP8	blue	-0.34910841	-0.036477948	-0.177154619	0.106468374	-0.079640778
PID1	blue	0.343316124	0.099457542	-0.434371581	-0.054183721	-0.210502773
TIGAR	blue	0.766934078	-0.291735993	-0.197291631	0.267822408	-0.268224568
FASTKD3	blue	0.647625453	-0.513146322	0.232146469	-0.484473134	-0.733123807
SH3TC1	blue	0.842570562	0.145199039	-0.018520948	-0.283012329	-0.317797109
C3orf14	blue	0.68664311	-0.200034666	0.382764403	0.048679586	-0.151927755
TRMT12	blue	0.556953533	-0.132793777	-0.311975982	-0.032431173	-0.405564975
POLI	blue	0.460288785	0.128433317	0.57746862	0.270653294	0.282493182
ADAP2	blue	0.889264239	-0.225416604	0.075415812	-0.446350209	-0.591052871
HPSE	blue	0.756739293	-0.197719553	-0.429769277	0.080292846	-0.408894266
CLUHP3	blue	-0.708484003	0.070566012	0.473549229	-0.076782219	0.317928259
ADA2	blue	0.814375859	-0.120653107	-0.042688338	-0.456403012	-0.533947234
SIGLEC1	blue	0.352861802	0.347592603	-0.005602575	0.081960766	0.295028526
GEMIN6	blue	0.671912804	-0.712930489	-0.015847753	-0.156677454	-0.711262466
RAB20	blue	0.508183448	-0.449506391	-0.537682723	0.223641634	-0.474265014
CACNA2D3	blue	0.874549475	-0.343521522	-0.113456648	-0.194823982	-0.610537067
SMCO4	blue	0.859124626	-0.347706858	-0.191938696	-0.109245786	-0.614748998
MRPS28	blue	0.783299605	-0.570075118	0.130687655	-0.174075632	-0.600447399
CLEC5A	blue	0.535621919	-0.017411398	0.128201322	0.242496631	-0.007584709
LTBP3	blue	-0.279543115	0.206913085	0.760176674	-0.238424816	0.258824877
PSTPIP2	blue	0.66127795	-0.062461436	0.128705114	0.400275979	0.014803052
MCOLN1	blue	0.68747351	0.082924692	-0.199789512	0.306349598	0.012624319
SIGLEC5	blue	0.581678698	-0.365108201	-0.15753472	0.558764141	-0.144555587
SLC2A6	blue	0.800467385	0.057619768	0.002574319	-0.348600422	-0.308805008
TLR7	blue	0.736042476	-0.486185683	-0.298122883	-0.010531905	-0.544665237
KLF4	blue	0.801062751	0.143229145	0.01789918	-0.11136949	-0.128713062
TXNDC15	blue	0.608492281	-0.268303583	-0.154983007	0.075570062	-0.264997426
TMEM176B	blue	0.40555579	0.262000884	-0.186593783	-0.203120392	-0.064547304
RETN	blue	0.372579416	-0.025336226	-0.030842658	-0.014120127	-0.044744844
DHRS7B	blue	0.883456839	-0.349269022	-0.111062251	0.237104672	-0.418082303
SNHG32	blue	-0.185911464	0.115526506	0.387575853	-0.466555759	-0.088574222
C6orf15	blue	-0.810788841	0.325572269	-0.233839508	-0.016010376	0.461485896
C1orf56	blue	-0.582622159	0.194921111	-0.179013722	0.541290613	0.553656674
MZB1	blue	0.133253405	-0.067032407	-0.068844538	0.249141342	0.039945704
GPR22	blue	0.370605596	-0.14179073	0.027419369	-0.120653023	-0.154205635
RNF146	blue	0.734810613	-0.546566579	0.016336609	0.334222091	-0.303446775
LSG1	blue	0.396566717	0.084019799	0.459929462	0.398050844	0.267932664
ACOT9	blue	0.717557574	-0.389737856	0.095229397	0.22405943	-0.2759301
LRRC37A2	blue	-0.366784146	0.22465099	0.644090963	0.073081646	0.363337645
TENT5A	blue	0.714291302	-0.142276683	0.117848186	0.122080245	-0.125827656
LDLRAP1	blue	-0.293639054	0.345240712	0.164487645	-0.291334434	0.095687002
SHTN1	blue	0.417986557	0.115599871	-0.161438484	-0.098058504	-0.159706396
TMEM268	blue	0.680260777	-0.185739475	-0.125380729	0.390375472	-0.097183577
TBC1D2	blue	0.904612505	-0.316737779	-0.015783135	0.107661888	-0.377154844
SLC27A3	blue	0.934495472	-0.34561512	0.118076628	-0.304696826	-0.612861952
ACER3	blue	0.888393544	-0.122634626	0.070475559	-0.403142953	-0.548590039
ZNF703	blue	0.887382243	-0.366485935	-0.036376939	-0.201294502	-0.589057538
YWHAG	blue	0.825435044	-0.602528755	-0.028799392	-0.286262949	-0.774429772
SNX9	blue	0.623127137	0.269180411	0.266027093	-0.089594575	-0.026961715
MARVELD1	blue	0.662215658	0.184479836	-0.300230869	-0.200170637	-0.281908317
NDUFB10	blue	0.727601042	-0.257530065	0.123928918	-0.52448506	-0.64275339
FUCA2	blue	0.898457511	-0.056410931	-0.054682107	-0.245151691	-0.429110754
NEK6	blue	0.711672284	0.049272194	-0.425243379	-0.171450118	-0.380687653
RHOU	blue	0.755840206	-0.579173074	-0.232102518	0.050444254	-0.544240407
PHPT1	blue	0.756570161	-0.642051604	0.016963244	-0.378726104	-0.837826018
CHURC1	blue	-0.404646631	0.23059289	0.714164706	-0.291964507	0.303974556
NTPCR	blue	0.654062453	-0.155876054	-0.082228913	-0.396863269	-0.476095907
MS4A7	blue	0.761628584	-0.393203701	0.134808302	-0.231816997	-0.4299486
FAM118B	blue	0.770284596	-0.52037094	0.077460675	0.014268202	-0.582816929
TSHZ3	blue	0.578069495	-0.284187629	-0.203960864	0.11738874	-0.387539665
RNF135	blue	0.88575739	0.130851824	-0.06291419	0.021142788	-0.147636151
GPR34	blue	0.427130736	-0.099753986	0.219456851	-0.000455145	-0.077814008
IFI27L2	blue	0.469472251	-0.587136827	0.070391474	-0.306481847	-0.616549653
LRMDA	blue	0.831491477	0.01752402	-0.030041689	-0.094935873	-0.32982622
SLC46A2	blue	0.888189323	-0.208919021	-0.010086712	-0.190200254	-0.430212563
MRPL27	blue	0.866318341	-0.606657875	0.122652844	0.066635202	-0.58013135
BMS1P20	blue	-0.297139984	0.249431034	0.032255146	-0.080731964	0.137390466
TMEM121B	blue	0.599628338	-0.082448886	0.132907057	0.301809779	-0.054758771
TM2D2	blue	0.73425647	-0.670886712	0.187741349	-0.056620347	-0.591536122
NIPSNAP3A	blue	0.606032567	0.413477553	0.024238527	-0.018091597	0.180916438
LENG8	blue	0.581717053	0.409714781	0.373378304	-0.134283188	0.15182486
SULF2	blue	0.628922679	0.114258295	0.051904278	0.396901091	0.09379825
UTP4	blue	0.299506002	-0.010713261	0.719008585	-0.259525867	-0.066873239
SETD7	blue	0.84736449	-0.335145232	-0.049536416	-0.522608792	-0.735477445
USP40	blue	0.610604087	0.302285607	0.247864983	-0.208818329	-0.090076433
ARHGAP18	blue	0.561890309	0.315900904	0.417687024	0.004681492	0.155341414
DRAM2	blue	0.874610998	-0.109628659	0.190109468	-0.225476902	-0.384665378
SAT2	blue	0.914886836	-0.087821951	0.121647456	-0.392814614	-0.481368216
ARRDC4	blue	0.462833896	0.484316982	-0.03190978	-0.241836416	0.064976698
KNSTRN	blue	0.715375936	-0.408300637	-0.085026411	0.336056611	-0.273744689
SLC25A29	blue	0.268112525	-0.35414407	-0.184720934	0.16172337	-0.15822081
CCDC50	blue	0.37416484	-0.031224575	-0.189475344	0.059460662	-0.13164828
VPS37A	blue	0.622545706	-0.234657213	0.233830393	0.481139039	0.019029841
TRAPPC6B	blue	0.625870658	-0.175843954	0.552652769	0.188759376	0.039094952
UBE2E2	blue	0.841604716	0.225430348	0.084625642	-0.188778157	-0.14744241
ANKRD50	blue	0.954253898	-0.337854763	-0.041553447	0.13311827	-0.42072892
KLHDC8B	blue	0.297923167	-0.065615986	0.094640072	0.472212613	0.1943999
LRATD2	blue	-0.197024573	0.122007433	0.291060733	0.038523683	0.316852969
HEIH	blue	0.677362879	-0.297407574	0.16278028	-0.368832012	-0.531715287
FMNL2	blue	0.41038642	-0.150861734	0.195427296	0.25116645	0.080947942
SUSD1	blue	0.781038849	-0.446316542	-0.146478474	0.144486427	-0.443518953
CAPS	blue	0.541523095	-0.108802799	0.21747067	-0.221397955	-0.3017514
WDSUB1	blue	0.823876032	-0.145188509	0.12218605	-0.096992163	-0.420984613
U2AF1L4	blue	0.389341453	0.261559134	0.176532552	0.043205376	0.174529599
NAPRT	blue	0.551363363	-0.244944509	-0.173574605	-0.260780719	-0.443193509
FAM20C	blue	0.753159741	-0.354214883	-0.182883865	-0.277315032	-0.653679238
TXNDC16	blue	0.851740484	-0.223394416	0.074141233	-0.147990352	-0.470329694
SESTD1	blue	0.826813991	0.066490183	-0.125361751	-0.160595172	-0.354776118
MPEG1	blue	0.865826129	-0.277355782	-0.31351191	-0.267495714	-0.604671299
CENPW	blue	0.732578442	-0.085335372	-0.166048468	0.058596065	-0.246600593
SGMS2	blue	0.79716269	0.196903547	0.151991308	-0.125364301	-0.075835645
ZNF503	blue	0.727685632	0.001086739	0.089661372	-0.547684402	-0.387697559
YBEY	blue	0.311417	0.422885093	-0.130624904	0.010023061	0.142529529
FBXL16	blue	-0.636131557	0.390868706	0.15873654	-0.181282169	0.347365307
UBXN11	blue	0.759565986	-0.102661085	-0.125974072	-0.527699526	-0.564551288
LOC389831	blue	0.621621453	-0.425596554	0.184928743	0.294002602	-0.208053098
FAM241A	blue	0.686642853	0.394666908	-0.226388099	0.04144051	0.077660267
FGD4	blue	0.735353154	-0.196500866	-0.09730346	0.523579603	-0.048781534
GIMAP7	blue	-0.481106641	-0.319896488	0.434111056	0.244672427	0.276257666
RNF144B	blue	0.485484857	0.188580001	0.274857843	0.346743574	0.266256966
OLIG1	blue	0.559533635	0.383404528	0.348048803	-0.003839962	0.229409251
S1PR3	blue	0.732260765	0.059183806	-0.434003448	-0.271735937	-0.42120562
LOXL3	blue	0.748710752	-0.344269675	0.047525027	-0.336102191	-0.577714755
DNLZ	blue	-0.256388092	0.140858585	-0.355505431	-0.190545231	-0.08293504
MFSD8	blue	0.457190216	-0.040000025	0.521866949	0.086029241	0.002292582
TDRD9	blue	0.743124963	-0.446682875	0.164952427	-0.087300542	-0.551971268
WDR27	blue	-0.349240138	0.51511277	0.05819478	0.217663638	0.694349122
NUDT16	blue	0.708545515	0.141052228	0.10614099	-0.006596213	-0.077711282
CALHM6	blue	0.642658806	-0.225006992	0.108783415	0.175110403	-0.230875088
CPNE8	blue	0.732661449	0.237203695	0.007518202	0.102463463	0.063807198
C1orf162	blue	0.916725839	-0.2841252	-0.10008341	-0.305339772	-0.662621282
ZDHHC1	blue	0.674020595	0.295296581	0.005549259	-0.311294069	-0.156089144
TATDN3	blue	0.073764368	-0.092341355	0.211329074	0.4717912	0.351920993
LINC01503	blue	0.907564181	-0.034788328	-0.103384412	-0.194392382	-0.421564971
MS4A14	blue	0.849506049	-0.159081525	0.049856157	-0.346674337	-0.44141857
TMEM44-AS1	blue	0.345954123	-0.260588058	0.052333466	0.305320171	-0.158952422
PBX4	blue	-0.402790643	0.194307242	0.473072122	-0.166862897	0.356703531
IL10RB-DT	blue	0.487397914	-0.192838966	-0.422516898	0.296226665	-0.179893705
PATL2	blue	-0.471346558	-0.263173812	0.116482858	-0.103373648	0.05110143
MIR142	blue	0.681251073	-0.39245973	0.544484611	0.202330981	-0.159614418
CLEC12B	blue	0.729117423	-0.161786742	-0.170918104	0.044731783	-0.36807486
USF1	blue	0.613186236	-0.303909954	0.375810587	0.442505679	-0.01559153
FBXO6	blue	0.706564267	-0.406673601	0.167401441	0.36860579	-0.25170108
ERMN	blue	0.708014326	0.125534373	0.579273752	-0.13480881	0.013299505
GGACT	blue	-0.297042588	0.204483026	0.137438495	0.02642393	0.241365639
SSBP3-AS1	blue	-0.743013219	0.312370604	0.513606132	0.00565543	0.571058643
SELENOO	blue	0.803558123	-0.224830846	0.198410367	0.000978635	-0.315585851
TRDV3	blue	0.173799551	-0.583992007	-0.093223313	0.2584311	-0.208296181
LDLRAD3	blue	0.69435155	0.278880616	-0.076926617	0.016516441	-0.000951871
RAB12	blue	0.467930043	-0.170344116	0.092419819	-0.059889395	-0.308166206
LOC100505501	blue	-0.438803416	-0.04757927	0.3143106	0.275144213	0.330114507
GIMAP8	blue	0.760821116	-0.738735872	0.105032059	-0.10155069	-0.702190078
NRROS	blue	0.8027928	-0.572049718	-0.06431932	-0.320213384	-0.731517517
MCEMP1	blue	0.850731004	-0.302304094	-0.287249554	-0.282705019	-0.661427401
TMEM170B	blue	0.83973289	0.0604581	0.024446319	0.323527899	-0.014549185
VSTM1	blue	0.860438418	-0.302849961	-0.040861499	-0.072017518	-0.466169181
RBP7	blue	0.856950146	-0.059448615	-0.16100838	0.06794473	-0.312593293
ARMH1	blue	0.452559191	0.281988676	0.176158258	-0.427487323	-0.226538105
FCRLB	blue	0.522970292	-0.30388651	0.059922047	0.042436782	-0.35283051
SETD9	blue	0.39476578	0.379923162	-0.228612003	-0.118509239	0.017732754
DAPK1-IT1	blue	0.680204551	-0.501979467	0.188071812	0.460889927	-0.229884744
CHST13	blue	0.585764722	-0.310665164	-0.117288174	0.43394156	-0.139887607
UICLM	blue	0.691885073	-0.011462812	0.189112572	-0.162950508	-0.095178093
PRAM1	blue	0.937412186	-0.061688686	-0.009440693	-0.052545014	-0.332493218
LOC101928429	blue	0.775137554	-0.394961994	-0.086821782	0.303866072	-0.302353514
NOMO3	blue	-0.29396126	-0.135761797	0.653139054	-0.169919278	0.111474166
GIMAP1	brown	0.427397962	-0.766767841	0.273434406	-0.147925666	-0.597508746
THEM4	brown	-0.445605462	0.586425764	0.579105354	-0.122814157	0.579292639
TC2N	brown	-0.484830781	0.87592989	0.167748327	-0.241991008	0.622936212
ARID2	brown	0.139795307	0.351330923	0.477617992	0.24435933	0.431231203
ND6	brown	-0.566027713	0.650301271	0.167115587	0.016839359	0.599999651
EFCAB13	brown	0.153658798	0.566058997	-0.070935236	-0.046736376	0.238733791
PRF1	brown	0.182835495	-0.879606401	0.245905046	0.173904835	-0.47401829
ZBTB24	brown	0.134353564	0.857909971	0.158150747	-0.3556742	0.380365892
CREBRF	brown	-0.180538247	0.830242139	0.150751994	0.321763709	0.831463332
ITPKB	brown	-0.536274873	0.836427626	0.201149593	-0.018253546	0.70858141
DNAJB9	brown	-0.5379431	0.834579313	0.044525102	0.350456959	0.901216651
HNRNPDL	brown	-0.425057665	0.92111569	0.074065178	-0.191283755	0.68131275
NDUFA10	brown	-0.209924849	0.900977306	0.058834911	-0.076846079	0.65680184
MS4A3	brown	0.161585205	-0.579671501	0.336386368	0.376709934	-0.155367604
ZNF641	brown	0.421248054	-0.65188356	0.288077992	0.216708186	-0.265047674
RAPGEF6	brown	-0.346476703	0.771807516	0.358084925	0.153149312	0.759394828
ETS1	brown	-0.410451923	0.604258975	0.066579589	-0.269455472	0.347660319
CCNL1	brown	-0.623434992	0.793298746	-0.055839377	0.344026944	0.838076638
PRR5L	brown	-0.106358416	-0.531703714	0.443232918	-0.012770646	-0.125716743
SAMSN1	brown	0.173706977	-0.779529179	0.086912277	0.194899899	-0.310875471
KLF6	brown	0.054570026	0.722826535	-0.178971137	-0.225341222	0.369468159
PSMD6	brown	0.046153174	0.748909891	0.366026829	0.309623424	0.743059086
VIM	brown	0.242386595	0.606208929	-0.179300454	-0.2098439	0.212707382
CD55	brown	0.276053438	-0.683075927	0.095938577	0.003360162	-0.437800752
HINT1	brown	-0.030142467	0.875020821	0.329717983	-0.227684284	0.531475494
RPPH1	brown	-0.311007341	0.531028187	-0.251301987	0.116082953	0.357429813
MEX3C	brown	-0.026360633	0.899705813	0.178186114	-0.08011587	0.597580938
BBX	brown	0.1338619	0.533418606	0.302864403	0.250542169	0.48341936
BCL10	brown	-0.28481425	0.778694102	-0.211351568	0.409697158	0.724190377
MIR570HG	brown	-0.114000644	0.421490736	0.350906764	0.054171749	0.42649218
CHRM3-AS2	brown	-0.070498329	0.27454739	0.514453623	0.101235312	0.363655297
IFT80	brown	0.030201719	0.587826684	0.626928894	0.143297559	0.637517132
KRAS	brown	-0.105832667	0.864074493	0.258726947	0.148139544	0.71909573
ZC3H12D	brown	-0.23003368	0.693555412	0.292278129	-0.308819482	0.484950833
BTG1	brown	-0.474525845	0.8961678	0.052771256	-0.019707642	0.674854805
WTAP	brown	0.135721439	0.646188261	0.028381531	0.034071868	0.475599355
STXBP3	brown	0.228171897	0.559048651	0.002872	0.500764343	0.554384471
SF3B6	brown	0.27962412	-0.480567963	0.579424843	0.158078727	-0.137950714
SNRPB2	brown	-0.303370605	0.488708528	0.418588402	-0.216986027	0.433162993
SMARCC2	brown	0.03420766	-0.419345545	0.717286064	0.259554452	0.073240053
PPP4R3B	brown	-0.333075961	0.679555399	0.267242883	0.182637353	0.688941962
RNF103	brown	-0.362769454	0.938497637	-0.11695811	0.071052432	0.687701148
AP3M2	brown	-0.277003475	0.686477197	0.314712935	-0.414736485	0.442381126
SETD5	brown	-0.529690113	0.573600508	-0.392969853	-0.174412696	0.339791618
MGAT4A	brown	-0.278063976	0.887280701	0.2470256	-0.187931956	0.595874758
CAPZA2	brown	-0.021363868	0.764567852	0.382485526	0.134859049	0.706616947
EREG	brown	-0.021994584	0.41887836	-0.250062426	-0.1361466	0.207294468
MLLT3	brown	-0.369729405	0.896231042	0.201358309	0.025485386	0.728214258
SLC6A16	brown	0.248342569	-0.687560289	0.150284023	0.019851852	-0.505187257
APP	brown	0.166268977	0.772034901	0.004801622	0.368730459	0.666382973
DNAJB1	brown	-0.688396001	0.832286823	0.084642092	0.054006719	0.791290202
KTN1	brown	-0.423563123	0.797624285	-0.015112021	-0.082702256	0.652470086
CCND2	brown	-0.378975012	-0.392628708	0.630231161	-0.096003203	-0.049898713
PPT1	brown	0.042172894	-0.462206104	0.072002593	0.257104599	-0.33174106
TXNIP	brown	-0.512377671	0.400031203	0.477116015	0.019924805	0.42938211
EIF1AX	brown	-0.371880022	0.836786404	0.140979409	0.096615304	0.839391419
STOM	brown	0.083871282	-0.818079361	0.020854875	-0.115995309	-0.700757644
BCLAF1	brown	-0.165791589	0.770602415	0.420072965	0.232523731	0.77241246
UBA2	brown	-0.203448002	0.835136844	0.006975636	-0.239401432	0.545880081
PRNP	brown	0.01939673	0.702729225	0.288838639	-0.382192134	0.423473813
NDUFA5	brown	-0.483989524	0.68822867	0.047933553	-0.338931602	0.407832734
ZFP36L2	brown	0.351948382	0.578623046	0.251039134	0.058213138	0.368891741
PPP1CB	brown	-0.475722703	0.781761207	-0.116277962	0.419562314	0.852854899
NFKBIA	brown	-0.277124265	0.89997815	-0.22099508	0.093631477	0.609322808
ACSL3	brown	0.318840356	-0.773165193	-0.201864037	0.113183607	-0.535361655
PPP1R10	brown	-0.087462008	-0.620396175	0.124692865	0.34936487	-0.22047887
NCAPD2	brown	0.522745529	-0.495329242	0.193251039	0.097878142	-0.333328196
SLC20A1	brown	0.236763418	-0.833670062	0.234210958	0.246761802	-0.457080334
SETX	brown	0.371339123	-0.853731198	-0.095530268	0.422902214	-0.490362787
PPP1R15A	brown	-0.394876939	0.83895688	-0.169077739	0.180047504	0.671082282
PPP1R2	brown	-0.374182473	0.935509574	0.225697554	-0.241959541	0.64170795
AASDHPPT	brown	0.579766648	-0.77817935	0.066970428	0.042296084	-0.597882067
CDKN1A	brown	0.140169134	0.561366063	-0.299640831	-0.004282594	0.227793614
KLF10	brown	0.122816087	0.843537879	0.121679609	-0.332027438	0.392602819
MAPK14	brown	-0.029152963	-0.659837781	0.110047019	0.511615257	-0.173508741
FADD	brown	0.256478306	-0.866894768	-0.029856055	0.456886148	-0.401142845
TNFAIP3	brown	-0.525937212	0.891038664	0.03741856	-0.221661987	0.613032915
NPC1	brown	0.382850073	-0.838238574	0.149056574	0.27243127	-0.453123305
TOB1	brown	-0.588444569	0.842493251	0.065251322	0.066402805	0.758352369
BET1	brown	0.182107002	-0.731629113	-0.020021925	0.356052792	-0.377578269
DDIT4	brown	-0.450378173	0.551438709	0.145598716	-0.136383455	0.393157315
CTSS	brown	-0.229899883	0.928505818	-0.116022588	0.148764195	0.751788857
RGS1	brown	-0.555573307	0.753049318	0.165369292	-0.443702409	0.493209571
HLA-DQA1	brown	0.131983069	-0.681935872	-0.152808778	0.406117603	-0.263536558
NCK2	brown	-0.275691258	0.796345915	0.102821904	-0.006115846	0.626495962
DHX8	brown	0.443356863	-0.714140986	0.196740627	0.483705282	-0.296214812
TBC1D4	brown	-0.49022985	0.842235862	0.077552578	-0.041449029	0.664729676
NELL2	brown	-0.415325476	0.632884891	0.192075913	-0.285850638	0.398287799
PSMD5	brown	0.559955733	-0.819798751	0.097746534	0.144396495	-0.571105144
MAP4K5	brown	-0.003205741	0.705662739	0.188843888	0.145844661	0.641024516
ZEB2	brown	0.068500332	0.751836807	0.277006515	0.089616451	0.662351878
TDG	brown	-0.276267336	0.654509189	0.285941815	-0.2337952	0.520051851
JUND	brown	-0.192176386	0.847729987	0.195652819	0.201955281	0.795690768
TCF4	brown	-0.112892325	0.725677348	-0.126117407	-0.020812134	0.465149192
LUC7L3	brown	0.227131883	0.680869991	0.517840238	-0.226666849	0.418573311
CRCP	brown	-0.194149064	0.911024609	0.082192481	0.16925508	0.787761162
NFKBIE	brown	-0.066836333	0.921272983	-0.123799176	0.133664002	0.669924483
CYP27A1	brown	-0.44389383	0.593390254	-0.531076274	-0.048717434	0.245820931
ADK	brown	0.561081705	-0.627858664	0.04800718	-0.064467799	-0.609605477
APOBEC3G	brown	-0.231358147	-0.773028618	0.219515471	0.073970783	-0.28603403
GCH1	brown	0.639051567	-0.622875323	-0.107558445	0.001711533	-0.542737336
DBF4	brown	-0.362809955	0.864440956	0.267979833	-0.114065987	0.78000836
ELOVL6	brown	-0.02945627	-0.734208801	0.243733554	0.533249546	-0.159819055
PMAIP1	brown	-0.359491373	0.826545783	-0.245153391	0.329118556	0.728298694
SRSF10	brown	-0.171314082	0.859014878	0.405256881	-0.05749219	0.694542169
CD83	brown	-0.309905731	0.880717203	-0.197246119	-0.149790856	0.557992347
PPP1R3D	brown	0.422904466	-0.744615114	-0.04047494	0.586109707	-0.295898619
PPM1D	brown	0.600019024	-0.698263963	-0.085747192	0.449209821	-0.448479388
NUAK1	brown	-0.417996208	-0.336877614	0.376060351	-0.202572164	0.005041208
NR4A2	brown	-0.473523124	0.619182866	-0.118138658	0.262686963	0.649006901
S1PR1	brown	-0.211198436	-0.747748449	-0.007392135	0.068362276	-0.30995074
TGFBR3	brown	-0.260731299	-0.684714994	0.234501528	-0.058631642	-0.276597479
TAP2	brown	0.232858992	-0.513133485	0.403094437	-0.048087277	-0.356462562
SMAD7	brown	-0.143246634	-0.719144389	0.057307056	-0.118389244	-0.425596544
CACNA2D2	brown	0.192643605	-0.86466013	0.171538808	0.019256376	-0.54377576
IL6ST	brown	0.099343428	0.854211226	0.176130232	0.121762861	0.658875966
PLK3	brown	-0.098887044	0.788208416	-0.129466825	0.403728639	0.642732543
IL1B	brown	0.044482346	0.543020598	-0.262647623	0.065997703	0.375078528
MAFF	brown	-0.536797691	0.676223885	-0.228676358	0.44790033	0.713568343
ANOS1	brown	0.519020749	-0.885316598	-0.101139898	0.09563467	-0.720501785
IL6	brown	-0.04006434	0.68489135	-0.017517637	-0.329820705	0.293149731
STK17B	brown	-0.169061957	0.929192698	-0.019279413	0.169307763	0.687275324
PIGA	brown	-0.213599788	0.963307328	-0.023456463	-0.033353512	0.69518997
IL2RB	brown	-0.019158479	-0.674422093	0.074496512	0.382179045	-0.29540945
GPR183	brown	-0.303024295	0.897831842	0.071119062	-0.298184461	0.578858046
H2AX	brown	-0.152322018	-0.718106177	-0.129942708	-0.004148996	-0.398315417
CCL20	brown	0.251380543	0.597251814	-0.254927307	-0.374678865	0.084324542
GZMA	brown	-0.195286158	-0.688643782	0.358672468	0.017188346	-0.287444775
PCSK5	brown	0.218255283	0.587469444	0.196988899	0.026181622	0.403400987
ALG13	brown	0.047826542	0.501227404	0.6186744	0.062197758	0.51589726
RASGRP3	brown	0.002869845	0.705123616	-0.102367286	-0.47528646	0.23655126
MYOM2	brown	0.100069418	-0.516446925	0.379000189	0.06316125	-0.137390836
POU6F1	brown	0.008203307	0.590373207	0.353156239	-0.233387848	0.326703221
BATF	brown	0.416659652	-0.695036399	0.422147924	-0.245867111	-0.544453373
SNRPA1	brown	0.134365521	0.660599109	0.389575361	0.002207225	0.55807508
PTX3	brown	0.23451084	0.645077202	-0.267203034	0.020149333	0.311265312
IL18	brown	0.060457507	0.651192327	0.534523113	0.244836299	0.719497943
FHIT	brown	0.042640464	0.582938398	-0.172147549	0.009637886	0.333054628
GUSBP14	brown	0.054167601	0.634878425	0.233446014	0.358973603	0.576156995
IL18R1	brown	0.062468029	-0.697132099	0.354900598	0.39079579	-0.135564516
ELANE	brown	0.579936564	-0.746289174	0.074967499	0.032092966	-0.691159128
CXCR6	brown	0.152239777	-0.758283747	-0.092290535	-0.078095366	-0.570126606
CCR5	brown	0.205657102	-0.838026876	0.010533588	0.158729846	-0.418424017
TSC22D3	brown	-0.188828403	0.769384347	0.287177453	0.23296581	0.715169763
SLC16A6	brown	0.66797183	-0.729861968	0.111177131	0.330556794	-0.463397127
IL18RAP	brown	0.264061224	-0.75040804	0.263331125	0.428180305	-0.337073438
MED6	brown	-0.167083911	0.702524689	0.455573973	0.00433077	0.622555717
TNF	brown	0.036729226	0.414537973	-0.468074643	-0.055296068	0.245293963
ICAM4	brown	0.037379241	0.619327209	-0.438018186	0.065552434	0.406689258
BIN3-IT1	brown	-0.484689585	0.86490434	-0.100371905	0.182960468	0.761275034
SH2D2A	brown	0.043320432	-0.756134742	0.125331532	0.092751364	-0.40916356
IL15RA	brown	0.584959369	-0.651351188	-0.014215025	0.191940315	-0.485619049
ARHGAP12	brown	-0.039539795	0.695093822	0.327828943	-0.287337849	0.463304677
TANK	brown	0.089150419	-0.763344631	-0.110083847	0.529569278	-0.25000451
GPR171	brown	-0.163443002	-0.671969543	0.240620163	-0.282718729	-0.421988239
KLRD1	brown	0.109625635	-0.789894735	0.044069605	-0.049071529	-0.581644572
PROS1	brown	0.531090904	-0.536189166	0.209902881	0.408099255	-0.297731203
CXCL3	brown	0.159628722	0.45997424	-0.30869189	-0.045540107	0.163517836
MEF2A	brown	0.322752635	0.587848961	0.523792778	-0.007711962	0.439358766
RNF11	brown	-0.349697018	0.78035985	0.095138644	0.461485591	0.842926409
ID1	brown	-0.004577112	0.55560596	-0.177248335	-0.388129101	0.164048773
PNRC1	brown	-0.583981358	0.766142809	-0.09117466	0.419238861	0.864830266
RALGDS	brown	-0.27394272	-0.587732752	-0.084014121	-0.356941193	-0.487871067
SYT11	brown	0.229995116	-0.775366465	0.344314176	-0.198515904	-0.49465722
CXCR4	brown	-0.617475844	0.800882203	0.118603367	0.045304363	0.717152976
PPM1B	brown	0.012252147	-0.763728162	0.199787337	0.529060108	-0.106347145
PAPOLA	brown	-0.386838231	0.857462367	0.016760872	0.402631799	0.90494764
PPAT	brown	-0.216045467	-0.604818868	-0.135432159	0.051060238	-0.408942717
SYNE1	brown	-0.210939542	-0.469992667	0.271361339	-0.174962304	-0.192790741
DUSP5	brown	-0.376658383	0.770792001	-0.167827184	-0.158581362	0.555420264
HSF2	brown	0.088437794	0.78526761	0.367447901	-0.240904567	0.427293264
CD69	brown	-0.677104826	0.839025029	0.065414869	-0.187348213	0.665014805
LRRN3	brown	-0.297989201	0.794466282	0.111624462	-0.085967685	0.530010219
HAUS3	brown	-0.204673378	0.854664365	0.129295297	-0.361344367	0.546988104
CST7	brown	-0.102229106	-0.71772889	0.120639841	-0.115728279	-0.497356664
GZMB	brown	-0.031833027	-0.644528186	0.329346024	0.224862385	-0.185691326
KLRG1	brown	0.237322115	-0.666562481	0.252203697	-0.037492138	-0.338073951
GZMH	brown	0.019099087	-0.523435638	0.265312063	-0.149697473	-0.281132528
FASLG	brown	0.084905123	-0.927420184	-0.098518122	0.142639879	-0.59831834
ZNF271P	brown	0.148652496	0.45828405	0.325755798	-0.052486618	0.243780193
CDK7	brown	0.405021924	-0.820940221	0.162696401	0.450893419	-0.391174327
PTGDS	brown	-0.009662689	0.494298231	0.587181392	-0.041120374	0.499716713
TMEM123	brown	-0.402693695	0.861517497	0.191926709	0.058343986	0.812666282
MRFAP1L1	brown	-0.22248773	-0.750339806	0.309702542	0.225227189	-0.173895545
FEM1B	brown	0.532588496	-0.829001775	0.331521575	0.165334317	-0.527519151
SUCLG2	brown	0.011423378	0.812231668	0.227445806	0.030696302	0.618646538
OSBPL8	brown	-0.276181401	0.678974916	-0.191563261	0.495855921	0.727408834
TIPARP	brown	-0.004306823	0.915207374	-0.016474009	-0.32559023	0.44479832
ANKRD46	brown	0.331509622	-0.805532692	0.112158586	0.190448117	-0.412287744
TSPYL4	brown	-0.63203742	0.801456678	0.115437766	-0.065254834	0.732131063
FANCI	brown	0.499683056	-0.80955626	0.203737172	0.241068223	-0.49015463
RSBN1	brown	0.536735112	-0.636173081	0.256714063	-0.025684868	-0.561827281
NKG7	brown	0.038742481	-0.814073195	0.261513166	-0.071362349	-0.48871312
YPEL1	brown	-0.175340252	-0.650029296	0.528028751	-0.015046691	-0.300748008
PLXDC1	brown	-0.01171747	0.698749373	0.237912114	-0.012928144	0.593330948
MAN1C1	brown	0.22509802	0.814151321	0.039612667	-0.125201469	0.402816418
LONRF1	brown	-0.15954302	0.799538746	-0.257948358	0.355951479	0.700085024
PYHIN1	brown	0.242839898	-0.654989002	0.232356224	0.281999162	-0.37287479
PRDM1	brown	-0.33073487	0.555746726	0.522089075	-0.316297539	0.403596956
RPL15	brown	-0.27507283	0.723817325	0.14446935	-0.384006364	0.444206808
NDFIP1	brown	-0.188990098	0.824712409	0.235437633	-0.311631659	0.441182086
PRELID3B	brown	-0.298491233	0.769567701	0.39865485	-0.175302368	0.695027514
BAG3	brown	-0.260656892	0.898817252	0.225827774	-0.054734288	0.761492813
NOSIP	brown	-0.484139479	0.604706406	0.329347505	-0.212371488	0.454928253
TSPAN13	brown	0.00606866	0.656851343	-0.180612859	-0.037981356	0.293792428
UFM1	brown	-0.448209688	0.850325672	0.151532124	-0.158648148	0.717907035
IFT57	brown	-0.107483276	0.64442658	0.463324535	-0.173300015	0.41561514
IER5	brown	-0.280421399	0.723986143	-0.361465952	0.137203221	0.580485719
PLEKHF2	brown	0.092180971	0.674556118	0.060956102	0.182136087	0.575099023
FANCF	brown	0.35663903	-0.745083418	0.344221404	0.355923941	-0.316795865
RGCC	brown	-0.247953263	0.766606809	0.092605394	-0.408305016	0.488411219
SCML1	brown	0.284428005	0.428983305	0.531882095	0.103175255	0.344777932
ZFAND1	brown	0.084579538	0.677844353	0.415367938	-0.063316672	0.447673743
CCDC59	brown	-0.310843312	0.966592023	0.14010982	-0.127094802	0.655372844
VCPKMT	brown	-0.173976998	0.793392966	-0.027282464	0.33473372	0.687412062
PLAC8	brown	0.455614034	-0.787056264	0.066761694	-0.045746694	-0.690424926
RNF34	brown	0.118847519	-0.922141508	0.101880965	0.296252318	-0.423669886
SHQ1	brown	0.467497725	-0.913134958	0.047630699	-0.160311198	-0.795244735
TEFM	brown	0.545752182	-0.750524675	0.279753353	0.156327121	-0.418812153
SLAMF7	brown	0.068643359	-0.872318971	0.091187028	0.280618446	-0.379727571
ELP5	brown	0.689491686	-0.768393714	-0.015461747	0.113077106	-0.696429932
ZBTB10	brown	-0.04847325	0.918860301	-0.047569487	-0.108479216	0.596019461
ROBO3	brown	-0.439970812	0.697981943	0.289957902	-0.086643281	0.642239163
PLEKHF1	brown	-0.165894988	-0.780327541	0.372697933	0.047943377	-0.344812844
PLA1A	brown	0.124695858	0.544112496	-0.573515374	-0.114620243	0.172730879
FAM118A	brown	0.045391329	-0.602983126	0.383247475	0.188246135	-0.083670852
RTP4	brown	0.355723193	-0.821732724	-0.1032538	0.258460966	-0.464954975
GIMAP6	brown	0.219094489	-0.921869267	0.211598584	0.061858777	-0.516786165
PVRIG	brown	-0.241036478	-0.815442949	0.170939448	0.018728727	-0.455129288
RCAN3	brown	-0.113298842	0.383864108	0.601885945	-0.018406173	0.386152443
CRNKL1	brown	0.245939205	-0.874040385	-0.228672788	0.343028221	-0.471222477
SLC16A10	brown	-0.460986289	0.622131114	0.641797586	-0.049248543	0.64531973
IKZF5	brown	-0.498349045	0.806850086	-0.033766619	0.081022817	0.744093704
ANKRD55	brown	-0.043953695	0.651824781	0.050047008	-0.119419585	0.441730936
TENT5C	brown	-0.667572577	0.595688301	-0.02462731	-0.250457636	0.486320524
PPP4R3A	brown	-0.232816676	0.461362729	0.440240194	-0.008615669	0.478108651
KLHL28	brown	-0.532892974	0.770512231	-0.061032032	0.371594534	0.885519129
SYTL2	brown	0.32835759	-0.84615977	0.297181609	0.09595648	-0.432878874
KLRF1	brown	-0.242590208	-0.3768364	0.353117071	0.254392334	0.008122073
TBX21	brown	0.102594974	-0.798566105	0.174513609	0.251187267	-0.302858001
DENND2D	brown	0.011918623	-0.724820508	0.428748122	-0.121796293	-0.468303847
MAP3K7CL	brown	0.000360394	0.738709965	0.021137368	0.325194809	0.660091707
CISH	brown	0.085619301	-0.839951914	-0.167836504	0.234161274	-0.492882872
BACH2	brown	-0.343878264	0.603962985	0.348311304	-0.099258512	0.457218215
ABHD6	brown	0.424843954	-0.696308848	-0.177217191	-0.236746331	-0.736384179
ZNF83	brown	0.013097436	0.633465389	0.126047471	-0.122198807	0.441133629
NPIPB15	brown	-0.216549004	0.366665156	0.597271407	-0.055801198	0.394208403
SCAF4	brown	-0.042429508	0.857570039	0.15795744	0.023131004	0.668320695
LOC100996756	brown	-0.669023814	0.577987012	0.053445909	-0.236830212	0.540002909
AP3M1	brown	0.38459979	-0.943992205	-0.050801118	0.019025826	-0.753669245
RLIM	brown	-0.232530187	0.808818326	0.003931568	0.424667943	0.85131509
C14orf119	brown	0.372908788	-0.919720841	-0.156511913	0.302914313	-0.594446354
NFKBIZ	brown	-0.234949092	0.880212217	-0.168907604	0.114019302	0.651097176
SH3BP5L	brown	0.334528508	-0.719694991	0.049405826	0.537355025	-0.27550926
GBP3	brown	-0.074798333	-0.729707909	0.124519376	0.343605422	-0.197398641
HSCB	brown	-0.054676038	0.639460745	0.52310527	0.355579177	0.799902486
DDX11L2	brown	-0.336658438	0.534509389	0.323418947	-0.143157406	0.409668961
CFL2	brown	0.072072898	0.548425364	0.04445339	-0.124101776	0.260306148
BEX2	brown	-0.264088562	0.868554888	0.226261454	-0.143081808	0.555659768
IRF2BP2	brown	-0.293238223	0.944983895	0.034563084	-0.150766261	0.664506482
PPP1R15B	brown	-0.408533454	0.862855508	-0.118745039	0.267093001	0.812849935
PIM3	brown	-0.35936034	0.847702814	-0.153702715	0.193016748	0.768905441
SMIM15	brown	0.549167785	-0.863004162	0.007272805	-0.028279876	-0.711713661
MYADM	brown	-0.059699804	0.598474814	-0.312285356	0.179156801	0.506009665
CFAP36	brown	-0.000340802	0.501860055	0.424158062	-0.029124623	0.409513656
FAM217B	brown	0.10730943	-0.867760189	0.259775895	0.186828389	-0.429913853
BORCS7	brown	0.293656794	0.584602253	0.195640537	-0.364766154	0.133993935
CSRNP1	brown	-0.601907583	0.744228788	-0.11233998	0.403345314	0.82449636
MZT1	brown	0.244306001	0.748457811	0.233199211	-0.138685099	0.464478292
CHASERR	brown	-0.448274723	0.945032441	0.012017483	-0.019973392	0.743472253
KIF21A	brown	0.264112257	-0.816847631	0.181497943	0.238102221	-0.377881562
OTUD1	brown	0.107165877	0.554087293	-0.272334104	-0.277208429	0.172124279
C1orf131	brown	0.28407742	-0.924912503	0.118938354	0.163591558	-0.551072319
GORAB	brown	0.291633476	-0.48674179	0.562030182	0.148002179	-0.174639247
ZMAT1	brown	-0.105415176	0.778497594	0.407329121	-0.024381035	0.71190509
ARL5B	brown	-0.35145179	0.775235888	-0.020871762	0.151352509	0.626707172
FUT11	brown	0.111693808	-0.788758283	0.147353759	-0.075780372	-0.511937742
KLHL15	brown	-0.392621224	0.873356234	-0.172648914	0.272481421	0.822579245
FBXO30	brown	0.456943558	-0.762334034	-0.129036382	0.463128991	-0.439228855
C16orf87	brown	0.11500237	0.818892634	-0.02150884	-0.178665612	0.397262451
SLFN11	brown	0.651864	-0.548171251	0.262486422	0.047602199	-0.440608048
EAF1	brown	0.261230086	0.669746194	0.018103125	-0.090021857	0.403491853
MIAT	brown	-0.241932152	-0.608748861	0.300146744	-0.26227438	-0.318730392
OXNAD1	brown	-0.090988649	0.579219195	0.457007083	-0.290622031	0.364895656
TRABD2A	brown	-0.487328418	0.725013536	0.364629	-0.104428631	0.6451725
C2orf69	brown	-0.106937924	0.788950717	0.210173037	-0.05079401	0.631721061
RBM4	brown	0.011842049	0.715671617	0.108269743	0.058992528	0.542217602
PSMG4	brown	0.330271384	0.574243899	0.32208368	-0.092410035	0.29160974
ACCS	brown	0.10062101	0.558487616	-0.211975545	0.311909112	0.435945787
LINC-PINT	brown	-0.326214634	0.839104295	-0.067666512	-0.153567994	0.521025006
ZSWIM7	brown	0.131484368	0.396636256	0.491352123	0.025876515	0.402459003
ZNF738	brown	0.270984603	0.615646798	0.207155402	-0.116863078	0.274716764
LOC100996740	brown	-0.507584277	0.798695045	-0.009115178	-0.253950926	0.459496788
BEX5	brown	-0.368238624	0.696528558	0.139154707	0.134728244	0.629386237
LINC00324	brown	0.365077653	-0.849079939	-0.416580261	0.243238064	-0.649041166
LPAR5	brown	0.441105453	-0.617563801	0.165324788	0.407432605	-0.315223624
EOMES	brown	-0.106137795	-0.728314263	-0.107694216	-0.028987547	-0.475741994
LINC02591	brown	0.003336765	-0.728636076	0.326376801	0.097911726	-0.354560759
SLC26A6	brown	0.291250761	0.359291195	0.07548353	0.189201708	0.36213549
SIGLEC17P	brown	-0.084400645	-0.510559504	0.481353427	-0.085127057	-0.182529241
GPAT2	brown	-0.06293177	-0.423988742	0.1880944	-0.098090002	-0.272097963
ANKRD22	brown	0.436556002	-0.507181378	-0.268544694	0.260540714	-0.424380444
ATP2B1-AS1	brown	0.352812333	0.366742434	-0.185967664	0.083910289	0.199260278
TRG-AS1	brown	-0.08039843	-0.780294929	0.300478311	-0.255053937	-0.517253631
TIGIT	brown	-0.184968631	-0.427594532	0.198443076	0.171072274	-0.073026512
FRG1JP	brown	0.339535076	-0.705627614	0.060470752	0.059735292	-0.471383582
LOC101928419	brown	-0.129302651	0.461022643	0.038825465	-0.052697215	0.248422224
ZNF615	brown	0.486712779	-0.757087934	0.068464663	0.221087351	-0.528665354
CLEC2B	grey	-0.255141544	0.069523864	0.622356002	0.174650938	0.371507152
SEPTIN9	grey	-0.13316635	-0.039051716	0.677117557	0.038230042	0.256632159
RDH13	grey	-0.186732716	0.178721654	0.877936384	0.008986356	0.468737051
LOC100129917	grey	-0.100638456	0.027675948	0.637728875	-0.040762567	0.269392217
CHPT1	grey	0.217585497	0.361098206	0.16582551	0.044498062	0.118865481
GABPB1-AS1	grey	0.090749253	0.170036493	0.783960519	-0.082618535	0.181347875
PFKP	grey	0.070094039	-0.361347823	0.521156614	-0.153187102	-0.182677703
IER3	grey	-0.037152592	0.449217202	-0.522705969	0.105379855	0.249423347
CPNE3	grey	-0.181629106	-0.091482927	-0.128433237	0.038828817	0.07487611
PRDM2	grey	-0.227552852	0.228474427	0.689409249	-0.102743833	0.321333598
GSTM2	grey	0.121531701	-0.167995408	0.1794762	0.085723968	-0.113322087
GSTM1	grey	0.087873724	-0.161446598	0.163759966	-0.030443366	-0.114285864
SERPINB2	grey	0.126776289	0.0122868	-0.36055747	0.040878404	-0.046423824
MLH3	grey	0.215386024	0.340775716	0.300126065	0.255604386	0.335177264
CPA3	grey	-0.252733318	-0.0050251	0.41280504	-3.27E-05	0.176789856
TSPOAP1	grey	-0.067759236	0.131169681	0.181571728	0.232156889	0.287417967
SUN1	grey	-0.02928432	-0.116044085	0.714128149	-0.133165244	0.061910485
TXK	grey	0.057555983	0.193587401	0.858576085	0.079967097	0.407315388
LILRA3	grey	0.187152758	0.369527277	-0.467156591	0.254759268	0.235125531
HDC	grey	-0.225009682	0.294857868	0.184810245	0.149568355	0.434373303
MFN1	grey	0.103286749	0.169158107	0.484243431	-0.038879279	0.232818112
VAMP4	grey	0.244168445	-0.286603026	0.397740318	0.260611594	0.069436504
DEGS1	grey	0.166571374	-0.038149752	0.190867379	-0.102191628	0.071237747
LAIR2	grey	-0.124958377	0.183676372	0.628274456	-0.147668065	0.297015141
KIR2DL3	grey	-0.196610928	-0.207706097	0.563100313	0.092785307	0.163587572
KIR2DS5	grey	0.208702774	-0.241919846	0.569814573	0.113793562	0.049196639
HLA-DQB1	grey	-0.296970388	0.214983564	0.095533217	0.100404388	0.413212509
C3AR1	grey	0.322040439	-0.407322387	-0.590694153	0.112998321	-0.407829004
KIR2DL2	grey	-0.185102451	-0.092325379	0.564291546	0.116133444	0.274977102
KIR2DL5A	grey	0.099415292	-0.146447857	0.492305809	0.159308281	0.154201785
HLA-DPA1	grey	-0.086336541	0.151870236	0.234505639	0.284513284	0.353525521
KNOP1	grey	-0.014418914	-0.32505907	0.643220478	-0.12310107	-0.059654925
HIPK2	grey	-0.087235345	0.12806147	0.711120437	-0.175046507	0.169745451
PMS2P2	grey	0.190625085	-0.25361986	0.847485073	-0.029690484	-0.010674753
CCZ1B	grey	-0.109662072	0.313188693	0.732688105	-0.123014558	0.491123523
KIR3DL3	grey	-0.099555084	-0.093394961	0.64770195	0.158476967	0.286301651
SSR3	grey	0.275732894	0.29585225	0.698452806	-0.226135071	0.19376714
SLC12A7	grey	0.246114805	-0.435475774	0.416254366	0.023489719	-0.309190852
TMEM176A	grey	0.183940875	0.304816215	-0.06961272	-0.161593832	0.076634399
TMEM50B	grey	-0.052812394	-0.332034294	-0.202225044	0.103716194	-0.070621251
NLRP2	grey	-0.244344557	-0.004805147	0.743860806	0.043504156	0.340095174
CXXC5	grey	0.08319745	0.305404256	-0.302598763	0.116640622	-0.036787746
SPSB2	grey	-0.0953716	0.319616671	0.774398056	-0.052728936	0.31726119
BDP1	grey	0.036349002	0.248009501	0.630101777	0.168013149	0.386218422
DMAC1	grey	-0.177179422	0.228731615	0.579949518	0.125563937	0.429856129
ADHFE1	grey	0.074855709	-0.207797557	0.50827827	0.058575616	-0.127416202
ANKDD1A	grey	0.303232444	0.130333186	0.828040142	-0.173174189	0.201877275
RASGEF1A	grey	0.283082995	-0.40241342	0.010370686	0.1974774	-0.200678693
LOC100190986	grey	0.08089874	-0.000982585	0.732593724	-0.244397914	0.151773631
ZNF232-AS1	grey	0.013245993	-0.080192617	-0.186927762	0.013252634	-0.211390467
LOC101928152	grey	0.247453178	0.292813215	-0.630965502	0.251513508	0.109383161
EIF3C	grey	0.258178817	-0.099935899	0.727433008	-0.169723693	0.02549259
SMG1P5	grey	-0.069103565	-0.03293056	0.846471025	-0.192444863	0.218728154
HSPA6	turquoise	0.160033477	-0.325878751	-0.000993291	0.852747952	0.179405924
PIGX	turquoise	-0.101810001	0.146500232	0.009887219	0.922363789	0.614235663
C4orf33	turquoise	0.538235234	-0.290669918	0.428824393	0.536489276	0.127583358
TM2D3	turquoise	0.269948007	0.332343332	0.306936036	0.563398062	0.591322992
ACAP2	turquoise	0.18579523	0.206556415	-0.027925055	0.816041037	0.444375125
PTPRC	turquoise	-0.077483383	0.090275658	-0.342400915	0.749975979	0.43163475
CLEC4C	turquoise	-0.000146184	0.332663214	-0.03389647	0.691849717	0.648233577
COP1	turquoise	0.08458248	-0.280319492	-0.11007471	0.937854304	0.242733955
HSH2D	turquoise	-0.261342781	-0.209640441	-0.085337731	0.83567922	0.421254521
ARSG	turquoise	0.286397246	-0.164517838	0.529194972	0.616296285	0.293080729
DIP2A	turquoise	-0.266208396	0.250445085	0.373852778	0.322339552	0.41115687
ARL11	turquoise	0.089485468	0.113390534	-0.074326344	0.932934706	0.559355015
CARD16	turquoise	0.015214127	0.041762955	-0.321839485	0.769799384	0.333993161
SLC4A1	turquoise	-0.388699035	0.135856846	-0.191369722	0.421673255	0.303162919
CLEC4D	turquoise	0.475488662	-0.168171294	0.092093725	0.614153417	0.057409361
TLR4	turquoise	0.321926126	-0.623303973	-0.269497279	0.714201976	-0.239612086
SIGLEC10	turquoise	0.372975289	0.049073933	-0.11416497	0.661666959	0.345070215
SLFN5	turquoise	0.006042099	-0.334124173	0.279791664	0.571076381	0.202612572
C5orf24	turquoise	0.439344786	0.013810466	0.340701826	0.439156691	0.252672091
CEP19	turquoise	-0.026890359	-0.350541528	-0.064375336	0.895847971	0.286824398
SH2D1B	turquoise	0.197245246	-0.314796008	0.08365851	0.64113289	-0.007387026
FCRL3	turquoise	0.320308426	-0.32938751	0.106144824	-0.320796695	-0.478117408
CSF3R	turquoise	-0.273469908	0.064562088	-0.220324872	0.931368948	0.536400764
NIBAN3	turquoise	0.148718233	0.517925405	-0.001408334	0.4961489	0.49575017
VNN3	turquoise	-0.190964688	-0.015866476	0.147969906	0.813739878	0.471308662
CCDC125	turquoise	-0.084766103	0.061195597	0.15724529	0.95097951	0.589812443
LINC00189	turquoise	0.005450744	0.077063006	-0.126248194	0.607823407	0.330564038
ADGRG3	turquoise	0.021462181	-0.188099946	-0.134299453	0.931401275	0.377953312
BEND2	turquoise	-0.232534491	0.027506222	0.443096453	0.65419816	0.480733387
TCP11L2	turquoise	-0.323304146	0.50230275	-0.023928007	0.607493074	0.690740028
SSH2	turquoise	-0.002500541	0.2930579	0.102980221	0.80591155	0.58362731
ARHGEF10	turquoise	-0.053105915	0.088380753	-0.127309458	0.481870521	0.20593483
CYTH4	turquoise	-0.316397447	0.299409962	-0.040317686	0.788326004	0.683277535
STAP1	turquoise	0.060860232	0.397141526	0.422505996	-0.220091873	0.120131971
ACTR2	turquoise	-0.233742793	-0.187640889	0.494078298	0.530925053	0.48250114
CLEC7A	turquoise	-0.002575096	0.345674566	-0.057040937	0.791723868	0.612345913
FBXO7	turquoise	-0.225494197	0.14267354	-0.040442344	0.234312898	0.242629042
EPB41	turquoise	-0.422687221	0.302002712	0.053267686	0.528076993	0.622474516
TSC22D4	turquoise	-0.108234935	-0.320085282	0.216025016	0.81471747	0.377979095
PIK3AP1	turquoise	0.561309433	-0.109944891	-0.341753116	0.689752834	0.041169402
MBP	turquoise	-0.303352963	-0.53304254	0.079619868	0.61754028	0.003847457
ARHGAP27	turquoise	-0.139072573	0.214714569	0.113370252	0.677263155	0.522983674
SIRPB1	turquoise	0.092034496	0.049868332	-0.012831274	0.873654246	0.512847433
ZFYVE16	turquoise	-0.322720756	0.036620669	-0.03135778	0.675143614	0.444793453
NUMA1	turquoise	-0.115833738	-0.029953816	0.319371155	0.111990675	0.074945412
SRRM2	turquoise	-0.135329331	0.46441501	-0.082611138	0.323371262	0.464287867
SRGN	turquoise	-0.285492984	0.403887549	-0.116814178	0.728949274	0.744440441
ZNF655	turquoise	-0.127592853	0.293245309	0.133277432	0.693023622	0.680688727
CASS4	turquoise	-0.087177287	-0.25136956	0.145812422	0.878138844	0.40789856
MCTP2	turquoise	-0.102220606	-0.256601873	0.487156344	0.277387907	0.161548494
PTGS2	turquoise	-0.483771165	0.317484426	-0.127901939	0.794541659	0.721309974
LPGAT1	turquoise	0.282811385	-0.248169498	0.35619686	0.778092442	0.323829343
PPM1F	turquoise	0.062865354	-0.177758624	0.396914055	0.612657851	0.340679967
NAMPT	turquoise	-0.375738861	-0.008728738	-0.040494628	0.926323264	0.583512011
CAMTA1	turquoise	-0.276115154	0.105941409	0.444641696	-0.112837407	0.115975627
FGD3	turquoise	0.217247415	-0.107833724	0.058723478	0.899247876	0.32387066
KLF7	turquoise	0.144720696	0.275426444	0.284990134	0.769803009	0.613894332
IFIH1	turquoise	-0.417595668	0.515538827	-0.242487165	0.480011514	0.666172454
PTPRM	turquoise	-0.16610162	-0.091907954	0.060670742	-0.172261251	-0.236388474
TREML1	turquoise	0.144388487	0.197008427	0.226213604	0.582263116	0.351459534
TAGLN	turquoise	-0.003573488	0.44247193	0.181133169	-0.066681795	0.400387497
CD79A	turquoise	-0.007596451	0.38192989	-0.164549988	-0.528842587	-0.146368099
XRN1	turquoise	-0.150310633	-0.400312938	0.117515387	0.751356119	0.244438183
UBR5-AS1	turquoise	-0.135443889	-0.0419788	0.171155395	0.94334123	0.54297133
SLC19A1	turquoise	-0.289403741	-0.036968616	0.011156975	0.891902181	0.566412082
RTN4	turquoise	0.205783929	0.060339558	0.268040743	-0.340625225	-0.093847927
KDM6B	turquoise	-0.221695148	0.117157561	0.016144053	0.948362628	0.671299183
LINC00528	turquoise	-0.439308519	0.216920015	0.043943852	0.853254025	0.737636105
TENT2	turquoise	-0.152357602	-0.048336912	0.693496459	0.184049148	0.24896835
RBM6	turquoise	0.218637662	0.254864455	0.251341043	0.465280315	0.45353957
LOC101928343	turquoise	0.082429134	-0.107230371	-0.178548303	0.074854072	0.074596106
BTBD19	turquoise	-0.161477293	0.385035279	-0.348954865	0.45668252	0.421635399
APOL6	turquoise	0.048267832	-0.569594078	0.043656087	0.471353498	-0.134383932
MYCBP2	turquoise	0.438189731	-0.005596202	-0.140152788	-0.402783059	-0.433487918
MOSPD1	turquoise	-0.044333789	-0.06572397	0.238328183	0.582406132	0.302726148
TMEM272	turquoise	-0.460137409	0.440488885	0.292216224	0.546058784	0.740219159
RNF165	turquoise	0.057399202	-0.196397765	0.139148887	0.642288984	0.165733433
RAF1	turquoise	-0.250688311	-0.424234852	0.015660089	0.846756406	0.254879536
ASAP1-IT2	turquoise	-0.067300334	0.068881872	0.184592809	0.850130776	0.581196922
CD44	turquoise	0.441591559	0.397510749	0.16468107	-0.567810886	-0.046372575
CEP78	turquoise	-0.272898493	-0.218484577	0.43941585	-0.194010239	-0.049591402
SRPK2	turquoise	-0.370864299	-0.001471337	0.125644895	0.869592668	0.58710362
ZDHHC18	turquoise	-0.292021185	0.32979749	-0.162580268	0.683664122	0.694629663
PGK1	turquoise	-0.328348656	0.359900333	0.124323157	0.687477419	0.708474051
PECAM1	turquoise	-0.119551166	0.283648069	-0.298973981	0.343633335	0.391956255
GTF2IP12	turquoise	0.020252074	-0.349778026	0.037912443	0.454105668	-0.068430698
BANK1	turquoise	-0.056675553	0.489831403	-0.147701451	-0.500240431	-0.087021503
STX17-AS1	turquoise	-0.73991566	0.118306547	-0.144319755	0.13480874	0.301857265
DOCK4	turquoise	-0.237443931	0.517146435	-0.016386182	0.713873071	0.735674554
MAP4K4	turquoise	-0.468782023	0.42910491	0.064112307	0.599936789	0.775682061
SMCHD1	turquoise	-0.51968971	-0.018173476	0.271580403	0.77921329	0.60976738
NFYC-AS1	turquoise	0.035655778	-0.070694775	-0.485102388	-0.357335615	-0.372898859
CLIP1	turquoise	0.257891584	-0.104740955	0.568495285	0.36398692	0.17513665
CCDC163	turquoise	-0.061228274	0.061028096	0.371064811	-0.646761376	-0.237237297
SIRPB2	turquoise	0.52488849	-0.078366896	0.10641489	0.443974907	0.037043015
HCG27	turquoise	-0.027397601	-0.204881934	0.238009478	0.518865387	0.225372065
FNIP1	turquoise	-0.132914771	0.375548051	-0.096153158	0.80147408	0.639973961
LINC02273	turquoise	-0.519650643	0.075053847	0.214822176	-0.530197118	-0.004090532
LRRC25	turquoise	0.284515917	0.1077911	-0.036948192	0.646706434	0.442880178
LOC401261	turquoise	-0.528388579	-0.291494979	0.245763948	0.615775857	0.408028762
SFXN3	turquoise	-0.189217591	0.592459313	0.491423377	-0.442065849	0.314092217
IRF1-AS1	turquoise	-0.516139251	-0.207089335	0.000611257	0.541272618	0.337875703
NFE4	turquoise	-0.162997554	0.223927869	-0.288331578	0.690634643	0.571357045
LINC00342	turquoise	-0.351039615	0.653115036	0.307071963	-0.511651978	0.367871637
LINC01127	turquoise	0.143623017	-0.091113792	0.151079614	0.905637103	0.395995333
SLC25A28	turquoise	0.123864153	-0.207248899	-0.145314334	0.520772862	0.090578873
NEDD9	turquoise	-0.156432662	-0.184386831	0.042906157	0.861367057	0.425249417
LYST	turquoise	0.207551153	-0.612183413	0.201523248	0.65333417	-0.011435649
LINC02481	turquoise	-0.16836737	-0.402496771	0.018286807	-0.340828119	-0.486619926
FCRL2	turquoise	0.097725218	0.156765652	-0.159662134	-0.634004913	-0.435251771
RNF130	turquoise	0.463315163	-0.214321468	0.147708051	0.751102088	0.190002028
MPP7	turquoise	-0.0692124	-0.087614708	0.356737911	0.375348602	0.346771158
KRT72	turquoise	-0.01718271	0.548586822	0.535746435	-0.532937644	0.256965057
AGAP4	turquoise	0.163906647	-0.064722951	0.549070532	0.170715203	0.11975377
SOD2	turquoise	-0.450505268	0.1895049	-0.188119905	0.659238615	0.517412331
TRIM69	turquoise	0.156936181	-0.62034347	-0.115344926	0.278160214	-0.269507525
CSAD	turquoise	-0.285856471	0.176726778	0.344291467	0.689304834	0.700153138
TBC1D1	turquoise	-0.18335156	-0.085784024	0.035866544	0.901115039	0.446505374
BABAM2-AS1	turquoise	-0.338227421	0.268673399	-0.150812191	0.747505896	0.624703282
C16orf72	turquoise	-0.195629765	-0.140048306	0.064747909	0.928118521	0.475750899
LOC728613	turquoise	0.187538537	0.210480748	-0.218805866	-0.065251576	-0.071311126
TRIM13	turquoise	0.401928543	0.075732817	0.512064516	0.44861035	0.333248945
SCLT1	turquoise	-0.066005331	-0.116381077	0.148417791	0.865616867	0.423847008
FMNL1	turquoise	0.047490097	-0.057221592	0.322835531	0.81432734	0.528655164
TET2	turquoise	0.254063687	-0.075903458	0.022721648	0.763929589	0.201488018
LOC101928893	turquoise	-0.354151523	0.133136144	-0.168811861	0.83206528	0.490172371
TBC1D10A	turquoise	0.235991533	0.002576601	0.626471464	0.441880885	0.428980473
ATP6V0B	turquoise	0.325218778	0.287489803	-0.205294107	0.703860198	0.342198744
KARS1	turquoise	0.174567311	-0.312012293	-0.167158963	-0.428573695	-0.445458258
PRKAR1A	turquoise	-0.484212396	0.360564133	-0.127196548	0.676267854	0.728464107
DSP	turquoise	0.113571479	0.139057161	0.075149462	-0.575427298	-0.229161214
CSRP1	turquoise	0.495055333	0.313696066	0.265927111	-0.192629777	0.131880984
GLUL	turquoise	-0.162433638	0.028824795	-0.252093828	0.942309392	0.47770385
SPARC	turquoise	0.212171228	0.234923013	0.178035144	0.389173129	0.263653435
MCL1	turquoise	-0.283522597	0.337405129	-0.186897684	0.755178605	0.687290527
LAMP2	turquoise	-0.173268861	0.249755941	-0.095058778	0.900423296	0.637088834
STAT1	turquoise	0.162757808	-0.612235906	-0.244694376	0.516192776	-0.249104159
TAGLN2	turquoise	-0.440413129	0.232368895	-0.181279358	0.696471304	0.663739974
PHC2	turquoise	-0.031985238	-0.100750851	-0.143219787	0.974943102	0.387926175
SDCBP	turquoise	-0.125796614	-0.131968317	-0.27032095	0.893649264	0.339410765
SEPHS2	turquoise	0.237616819	-0.787397878	0.073111006	0.570073052	-0.303143752
CD59	turquoise	-0.358454129	-0.09207932	-0.074731082	0.757293237	0.441240484
SERPING1	turquoise	-0.072302294	-0.220779772	0.006737718	0.711750136	0.277928449
CD9	turquoise	-0.089702358	-0.139559494	0.227720431	0.312721834	0.127993434
ANXA1	turquoise	0.396059879	0.048650656	-0.039051783	-0.613401374	-0.350886986
MYL9	turquoise	-0.078598384	0.131929032	0.325225984	0.745664987	0.513064451
ATP6V1B2	turquoise	0.349806917	-0.55377758	-0.273394316	0.719691918	-0.19277526
PGRMC1	turquoise	0.302729225	0.171397903	0.158543591	0.335049651	0.161873787
YBX3	turquoise	-0.116355022	0.260904932	-0.049617217	0.236640925	0.279940855
SLC7A5	turquoise	-0.139496086	0.148811104	-0.003428168	0.415996173	0.398555212
CTBP2	turquoise	0.45063015	-0.556575439	-0.004630062	0.613659075	-0.181841995
RAD23B	turquoise	0.14945677	0.355449805	0.030541014	0.447670444	0.545497957
BTG2	turquoise	-0.331154194	-0.012695379	-0.016229902	0.926157883	0.544107896
WSB1	turquoise	-0.267364618	-0.190264048	0.49349174	0.413067953	0.301703877
IFITM2	turquoise	-0.476626754	0.101098038	-0.084825969	0.864073562	0.672143106
OAZ2	turquoise	-0.276802955	0.12187425	0.091074368	0.860913909	0.645166548
IGF2R	turquoise	-0.287070956	-0.118963484	-0.021943243	0.91474688	0.474657802
LRP10	turquoise	-0.284628799	-0.041154854	-0.189929148	0.927571316	0.452247733
TALDO1	turquoise	0.089802627	-0.144062598	-0.268442221	0.924044711	0.223790061
JUNB	turquoise	-0.478743544	0.310744107	-0.291238544	0.695723855	0.629581662
PPIF	turquoise	0.197652575	0.43458351	-0.195598605	0.684839363	0.457726712
ID2	turquoise	-0.377667588	-0.116295717	-0.264496822	-0.525296649	-0.256008566
NME1	turquoise	0.276250576	-0.307728603	0.212336975	-0.444765006	-0.453869707
TMX4	turquoise	-0.206610139	0.219084636	-0.296582089	0.477103618	0.298075219
PPP4R1	turquoise	-0.236763795	-0.115735337	-0.086809736	0.927703378	0.427465609
IFNGR2	turquoise	0.431393186	-0.525371204	-0.343292842	0.72303098	-0.184053899
UBE2L6	turquoise	0.22365001	-0.552114107	-0.152108012	0.529935061	-0.176778833
DLG5	turquoise	-0.02381964	-0.412581345	0.485219464	0.564517796	0.146878743
CDC123	turquoise	-0.016848726	-0.520082049	-0.017032952	0.799273758	0.074249737
SGK1	turquoise	0.344258911	0.10267982	-0.331449245	0.465799634	0.158975508
LBR	turquoise	0.023882231	-0.522316846	-0.243430252	0.753424932	-0.001659567
LIPA	turquoise	0.52693484	-0.307277225	0.21023032	-0.667127323	-0.746794224
MPZL1	turquoise	-0.088534563	-0.032886075	-0.314760823	0.895736133	0.358856954
IL13RA1	turquoise	0.122178913	0.164023249	-0.155563457	0.782453674	0.359110944
RRM2	turquoise	0.04798653	-0.558808243	-0.035219726	0.569907761	-0.004289112
CTDSPL	turquoise	0.432368667	0.24212096	-0.167765036	0.494638612	0.185298107
PKP4	turquoise	0.183118701	0.108979562	0.303708396	0.396068249	0.230574752
CPD	turquoise	-0.052002636	-0.176779412	-0.090740528	0.921385309	0.327785373
ACSL1	turquoise	-0.446771883	0.172448806	-0.269165827	0.8359935	0.601308388
ATP6V1A	turquoise	0.47846705	-0.26195413	-0.049141463	0.787760403	0.047420351
PTPN12	turquoise	0.184295896	-0.140973082	0.02589734	0.740237785	0.187516203
MAN2A2	turquoise	0.541069414	-0.079793393	0.197343305	0.569643873	0.119601828
IER2	turquoise	-0.403281762	0.083642293	-0.572614736	0.574334578	0.342132723
SEC14L1	turquoise	-0.284405028	-0.092773472	-0.062393872	0.934804133	0.507241623
MX1	turquoise	0.160091326	-0.152357281	0.097391791	0.402942586	0.259170085
PRMT2	turquoise	0.184686817	0.252645877	0.538878202	0.208584448	0.294791892
RALB	turquoise	-0.022055602	0.075022858	-0.113743919	0.948007566	0.547863021
VWF	turquoise	0.150966811	0.351090881	-0.350448625	0.414435399	0.290261187
RIOK3	turquoise	0.058007323	0.499063848	-0.057416499	0.473412491	0.486665138
LIMK2	turquoise	-0.345789501	-0.147087123	-0.018460795	0.887858841	0.465696268
VASP	turquoise	-0.182068508	0.120659064	0.110433058	0.866318758	0.550701921
SLC6A8	turquoise	-0.349034105	0.12378974	-0.176612706	0.5583288	0.395113919
TDP2	turquoise	-0.407523214	-0.216124864	0.01380974	0.821740769	0.420259811
GBP1	turquoise	-0.134038939	-0.52113757	0.035685749	0.586596975	0.023542133
SERPINF1	turquoise	-0.22139149	0.457744602	-0.012852045	0.426508285	0.659475248
TAP1	turquoise	-0.086222943	-0.60588202	0.028781812	0.671391516	-0.070440305
UBE2B	turquoise	-0.533974931	0.2694692	-0.02432003	0.840567942	0.738466939
PAM	turquoise	-0.083413468	0.104885783	-0.163399382	0.57746748	0.336019882
MXI1	turquoise	-0.498598681	0.377580262	-0.00962426	0.438556194	0.570150592
BAG1	turquoise	-0.20437785	0.171404194	-0.227167591	0.56518337	0.372139269
RGS2	turquoise	-0.295721096	-0.144702527	-0.141116406	0.847727699	0.451483928
BASP1	turquoise	-0.292492521	0.039056157	-0.307613082	0.894990999	0.51514615
PLSCR1	turquoise	0.475705539	-0.089473149	-0.209435164	0.269911463	0.013514042
MYC	turquoise	-0.156598003	0.070710739	-0.065249316	-0.424541795	-0.22077396
PFKFB3	turquoise	0.240378125	0.02624428	-0.558583246	0.679425419	0.110716031
SLC2A3	turquoise	-0.273194559	-0.21460147	-0.391682723	0.603132722	0.186914266
PCLAF	turquoise	0.159313804	-0.420576106	-0.143810487	0.561979977	-0.003372248
TNFAIP2	turquoise	0.305636463	-0.176094042	-0.025463689	0.674170269	0.14519455
SPOCK2	turquoise	-0.622163153	0.2803001	0.092530623	-0.509751356	0.140797723
IRF1	turquoise	-0.099430299	0.119821413	-0.102973418	0.68997741	0.431941124
GSTM3	turquoise	-0.194192991	0.367191475	0.138996566	-0.120274486	0.174421151
SVIL	turquoise	-0.103644407	-0.12431815	-0.07419967	0.920169835	0.415704644
GDE1	turquoise	0.684691344	-0.095278995	0.056813368	0.477030923	-0.004269889
LYN	turquoise	-0.086441997	0.016919742	-0.146314148	0.959327706	0.515526458
WIPF1	turquoise	-0.387843959	0.027345636	-0.06913755	0.80335598	0.598469443
TNFSF10	turquoise	0.171052468	-0.443306058	-0.042275875	0.766890838	0.100839511
H2BC21	turquoise	-0.333900578	0.064689694	0.142080825	0.870824357	0.636929343
CDC16	turquoise	0.315880627	0.209429503	0.44455963	0.545149159	0.513805414
IFNGR1	turquoise	0.49946122	-0.151151063	0.05446157	0.759058456	0.192039081
LTBP1	turquoise	0.134061127	0.08326107	-0.069102778	0.41817942	0.095280438
PKIG	turquoise	0.001519178	0.592607494	0.229762077	-0.125469322	0.289317221
GBP2	turquoise	-0.398206639	-0.147558964	-0.020539718	0.767224396	0.373333826
TFIP11	turquoise	-0.055012808	-0.351013991	0.494552708	0.222439788	0.063967123
AHR	turquoise	0.265967336	0.679309225	0.078974452	-0.565417455	0.152880773
RALBP1	turquoise	-0.451821337	-0.072100545	0.041377878	0.858391383	0.533729924
PBX2	turquoise	0.009324522	-0.082703868	-0.059997526	0.705990547	0.36002656
ANPEP	turquoise	-0.023050928	0.324205258	-0.285844624	0.730309861	0.586279764
NBN	turquoise	-0.100573498	-0.248596787	-0.154110045	0.831539429	0.310258817
ADM	turquoise	-0.248527031	-0.171501094	-0.280535501	0.84489756	0.363795488
GYPC	turquoise	-0.313329125	0.18589802	-0.051103775	0.318566607	0.277974987
IL1R1	turquoise	-0.434213738	0.044672187	-0.213584587	0.832198007	0.559127351
CRYZ	turquoise	-0.086766338	-0.264683387	0.132962326	0.369338892	-0.009494209
MPP1	turquoise	0.178656555	-0.043233135	-0.384178998	0.728255316	0.099694497
PYGL	turquoise	-0.002694284	0.030069914	-0.359262536	0.86767899	0.333001709
SLPI	turquoise	0.167554083	0.190868822	0.133374187	0.657353646	0.488386822
PTPRN2	turquoise	-0.369521566	0.04962186	-0.144044129	0.233234517	0.140880685
MTSS1	turquoise	0.246450432	0.40941271	0.1534996	-0.39356187	0.12852353
CHSY1	turquoise	-0.036814093	-0.371192216	-0.150474122	0.810811524	0.153323712
NINJ1	turquoise	-0.141336266	0.271319439	-0.309112064	0.752396632	0.519570524
CHST15	turquoise	0.42412027	-0.379508644	-0.40434377	0.685757908	-0.107117785
BAZ2B	turquoise	-0.053002916	-0.451645725	0.025430351	0.889558044	0.178685177
FECH	turquoise	-0.513681544	-0.085969792	-0.185717724	0.458001525	0.21443216
IMPA2	turquoise	0.424707892	0.090542411	-0.123521271	0.478914721	0.029072926
BCL6	turquoise	-0.101716161	0.000869981	-0.289296563	0.863281976	0.443680707
KIAA0040	turquoise	-0.207687157	-0.329474948	-0.292267257	0.744431772	0.081814982
GABBR1	turquoise	0.420307606	0.315761391	-0.200096121	-0.446867271	-0.250270056
IFIT1	turquoise	-0.228480543	-0.152655451	0.034433536	0.664264621	0.419075082
KRR1	turquoise	0.112785765	-0.150460724	0.536016402	-0.46588697	-0.253605132
MYO6	turquoise	0.1943939	-0.428219553	0.320840961	-0.340293424	-0.357993697
IL4R	turquoise	0.3198398	0.166290649	0.207655048	-0.193335089	-0.133129021
FCGBP	turquoise	-0.338732852	0.299204965	0.126083493	-0.043535773	0.264597595
PPIP5K2	turquoise	0.16689905	0.544250827	0.247037135	0.485394167	0.611944592
HDDC2	turquoise	-0.064904003	-0.226767848	0.472680705	-0.438036892	-0.188263515
MAP2K4	turquoise	-0.323042177	0.148722115	-0.10861286	0.864387348	0.574180241
IRF2	turquoise	-0.157224105	-0.310311453	-0.17273886	0.905572821	0.260990374
LMNB1	turquoise	0.050248854	-0.252109253	0.129475425	0.713275888	0.235248016
F13A1	turquoise	0.384229868	0.291394684	-0.086201961	0.470011571	0.191875887
MFAP1	turquoise	0.197091954	-0.675924371	0.255248094	0.573677009	-0.053067879
MMD	turquoise	0.197638661	0.328703854	-0.156937854	0.408428233	0.203475962
FAM8A1	turquoise	-0.513278355	0.26568037	-0.031133305	0.842266755	0.782261456
MME	turquoise	-0.242655535	-0.177266026	-0.182771241	0.899826901	0.340443555
SAT1	turquoise	-0.344544128	0.342025501	-0.038801831	0.755828883	0.717341293
SPR	turquoise	0.583763326	-0.333655646	0.154407436	-0.369937412	-0.542292627
PLEK	turquoise	0.047480759	-0.392875126	-0.068598722	0.634147038	0.048848306
TPBG	turquoise	0.296777225	0.389473595	0.091502978	-0.269298452	0.045699616
BPGM	turquoise	-0.391545316	0.181704456	-0.21252374	0.576027099	0.459897524
SORL1	turquoise	-0.431216533	-0.105044825	-0.123639698	0.904718582	0.509653693
APC	turquoise	-0.02197071	0.346479455	0.187461527	0.73517701	0.66967994
FEZ1	turquoise	0.292283039	0.009799956	-0.137589399	0.281132428	-0.117033709
NFIL3	turquoise	-0.532609221	0.498335429	-0.223284002	0.688549395	0.774533952
IFIT5	turquoise	-0.296572296	-0.089415882	0.31924693	0.347620096	0.45353971
ZNF516	turquoise	0.279092335	-0.011675535	0.024794203	0.895497818	0.351766923
POLB	turquoise	-0.043186332	-0.46534597	-0.067621266	0.868543814	0.147334208
IGF1R	turquoise	-0.306668898	0.233160725	0.036561165	0.867398022	0.672481795
TMOD1	turquoise	-0.499159488	0.18697695	-0.351234293	0.541948512	0.458389515
MAN2C1	turquoise	0.654367581	-0.066484733	0.282409464	0.251898746	0.000631215
PRKAR2B	turquoise	0.238022337	0.323127005	0.213307868	0.499013416	0.355417237
PI3	turquoise	-0.02046453	0.313021146	0.154842547	0.726375024	0.63813635
PDE4B	turquoise	-0.410766696	-0.088820769	-0.300777218	0.77733554	0.357450536
ZNF217	turquoise	-0.069748566	-0.497023177	0.19309353	0.772264566	0.225541013
SLA	turquoise	0.354507516	-0.462475656	-0.034366913	0.558325071	-0.106807813
GCA	turquoise	-0.281964312	0.039588317	-0.112405102	0.956345899	0.567952244
GUCY1B1	turquoise	0.56054172	-0.292472299	0.273904063	0.179128028	-0.316883087
WIPI1	turquoise	0.301411195	-0.373747662	-0.18797744	0.592825596	-0.067408704
IL32	turquoise	-0.128934554	-0.255921772	0.362338927	-0.401296482	-0.177807621
GAB2	turquoise	0.050329923	-0.09402091	-0.263096788	0.834254834	0.236428645
IRF9	turquoise	0.180391639	-0.584713327	-0.037351579	0.67862811	-0.040913854
THBD	turquoise	-0.020960924	-0.319245433	0.014448094	0.878503214	0.263610337
CD82	turquoise	-0.467925734	0.431862793	0.075742669	0.413343287	0.644604281
CHST2	turquoise	0.416464711	-0.002998521	0.382458225	0.522691043	0.147754309
MMP9	turquoise	0.029913397	-0.407633624	-0.282705622	0.786383879	0.014517698
BTN2A1	turquoise	0.198631971	-0.59772541	0.055200286	0.683042159	-0.124370941
NMI	turquoise	0.131614031	-0.47698323	0.096494485	0.865414742	0.170848384
PPM1A	turquoise	-0.616566752	0.281724443	-0.103695335	0.722878042	0.663931015
CEBPD	turquoise	0.148607616	0.00495765	-0.137528748	0.678179693	0.168138811
FCGR3B	turquoise	-0.502597783	0.123211116	-0.208430894	0.831313192	0.607677674
PTEN	turquoise	-0.031247273	0.303521007	-0.123000124	0.860001069	0.630659593
MIA2	turquoise	0.349447429	-0.58590701	0.445155856	0.519739386	-0.051883789
TOPORS	turquoise	-0.35301653	0.17300825	0.017850095	0.896362603	0.751536671
NRGN	turquoise	0.308568074	0.294652249	0.232738558	0.371855388	0.220565543
CCL4	turquoise	0.035409116	0.152663472	-0.565105371	0.326775987	0.127558911
NRCAM	turquoise	-0.237972101	0.119331455	0.307910484	-0.054261215	0.116600558
GNG11	turquoise	0.198944093	0.331460808	0.159418467	0.492023237	0.332015363
FOXO3	turquoise	-0.527968406	0.207926297	-0.092572385	0.745874706	0.647320729
TPST1	turquoise	0.197462603	-0.071804398	-0.010777767	0.817625932	0.279916549
ALOX5AP	turquoise	-0.217160365	-0.478673238	-0.191104418	0.637866876	-0.01214949
GMPR	turquoise	-0.195730414	0.127556753	-0.19275945	0.592706413	0.357956657
BACH1	turquoise	0.025577184	-0.236755016	-0.185651058	0.908802145	0.289350573
PSMB9	turquoise	-0.035304755	-0.546325081	0.027935929	0.712965213	0.002650886
TECPR2	turquoise	-0.243597434	-0.039910532	0.073302205	0.941042754	0.565980689
SKAP2	turquoise	0.060146551	0.061017736	0.310793282	0.826305562	0.489404114
IFI6	turquoise	0.080854465	-0.079678025	-0.057995155	0.377317583	0.226893141
PLEKHO2	turquoise	0.175090038	-0.619522572	-0.025666518	0.77991642	-0.04516595
IFI44L	turquoise	0.04551899	0.15776226	0.012385014	0.230385942	0.373723357
LTBP4	turquoise	-0.10440942	-0.333411022	0.258584703	-0.308511908	-0.170149239
SNCA	turquoise	-0.338083962	0.053100504	-0.152035556	0.37692888	0.213112506
CXCL1	turquoise	-0.179860641	-0.084188539	-0.207757941	0.911333161	0.37889848
BID	turquoise	0.247259736	-0.181672483	-0.125656313	0.90967431	0.289789903
C15orf39	turquoise	-0.04106002	0.275761832	-0.210299622	0.900730423	0.611853425
DMTN	turquoise	-0.475238933	0.132415869	-0.160590981	0.49319418	0.375217382
PPP3R1	turquoise	0.126627669	-0.137142689	-0.442415224	0.576115366	0.071732914
ST6GALNAC2	turquoise	-0.112191592	0.202938284	-0.209647426	0.834517567	0.518530945
SELL	turquoise	-0.622960723	0.204020221	0.050172087	0.602648151	0.684011802
ABCG1	turquoise	-0.292356936	-0.318569355	0.050235861	0.863096508	0.305455078
CD22	turquoise	0.152161705	0.092646767	0.077304448	-0.452880356	-0.361907331
N4BP1	turquoise	-0.06221514	-0.317551146	0.037067732	0.876123088	0.319724255
CD52	turquoise	0.10032053	-0.151562517	0.427543162	-0.59660114	-0.380977282
RNF24	turquoise	-0.201774215	-0.040541326	0.12326865	0.839817856	0.548155813
IRS1	turquoise	-0.114163838	0.177673211	0.650970151	0.468654833	0.516340051
ISG20	turquoise	-0.397753889	-0.140049111	0.162940578	0.684936034	0.419524663
UTP25	turquoise	0.283757081	-0.072556792	-0.051199912	-0.207247723	-0.208222934
IFIT3	turquoise	-0.170049869	-0.100759828	-0.028278542	0.754444326	0.444780329
DSC2	turquoise	0.026565245	0.003672627	-0.350730274	0.519947007	0.162198863
FAS	turquoise	-0.556516448	-0.205062581	0.00348197	0.802593104	0.43974681
DHRS12	turquoise	0.037395817	0.089760205	-0.113832871	0.744272079	0.346596888
TRIM21	turquoise	0.09863796	-0.77810708	0.035287577	0.589445793	-0.2175109
BTN3A3	turquoise	-0.458251976	0.226397957	0.110411944	0.504294898	0.66684586
TCFL5	turquoise	0.265555433	0.032228979	0.562218183	0.207146169	0.211483389
APAF1	turquoise	0.064002535	0.034849963	0.038596785	0.885852056	0.538177515
UGCG	turquoise	-0.256311857	0.376670143	0.424090207	0.457296269	0.729086677
AOC3	turquoise	-0.316082896	-0.195700418	-0.047474615	0.804211028	0.418530359
TLR2	turquoise	0.316407855	0.059490195	0.008795937	0.760798639	0.311715843
ICAM3	turquoise	-0.361809079	-0.268939546	0.063970433	0.805406872	0.340748123
MNDA	turquoise	-0.25655276	-0.041281012	-0.076174503	0.962800241	0.503961437
OAS2	turquoise	0.392970188	-0.253178083	-0.184764991	0.07006073	-0.191746971
GNAZ	turquoise	0.212443708	0.190406066	0.151478621	0.239538274	0.102296697
MX2	turquoise	-0.002723167	-0.106806055	-0.228574781	0.745798864	0.331052301
CDK5R1	turquoise	0.142265102	0.293373887	0.363975529	0.521482683	0.488901387
VIPR1	turquoise	0.431207863	0.389491015	0.363249362	-0.419065814	-0.050897576
ARL4A	turquoise	0.251772215	0.627263987	0.032450554	-0.653640704	-8.34E-05
MAP3K8	turquoise	-0.133979497	0.166660178	-0.155322637	0.79636282	0.549407889
ORM1	turquoise	0.023988329	-0.302248846	-0.178108964	0.717514187	0.080331021
ARHGAP26	turquoise	-0.102854351	-0.183250594	-0.036370302	0.935044876	0.449295727
CRIP1	turquoise	0.05158093	-0.09996703	0.144514156	-0.62156278	-0.265574221
CCR1	turquoise	0.28406255	-0.491858425	-0.115580263	0.558390091	-0.098222232
FPR1	turquoise	-0.312515215	-0.004129284	-0.172485754	0.776856065	0.433198988
NCF4	turquoise	-0.158222053	-0.067705359	-0.185789729	0.97153402	0.437819748
CSF2RB	turquoise	-0.395528401	0.098572531	-0.080637672	0.910569991	0.647210854
QPCT	turquoise	0.067209138	-0.101210287	-0.416141888	0.834969026	0.233850694
ATP7A	turquoise	-0.153728046	0.283966854	0.098595069	0.634850613	0.526334268
HCAR3	turquoise	-0.190760623	0.368251084	-0.159190571	0.725024055	0.642336361
IL1RAP	turquoise	-0.278005576	0.129248886	0.070731482	0.895274761	0.69291511
POU2AF1	turquoise	-0.298443911	0.50770553	-0.313246842	-0.594049255	-0.037710148
SPI1	turquoise	0.553880034	-0.296033201	-0.105353287	0.724149748	-0.037889387
EIF2S3	turquoise	-0.109207172	0.640094225	0.275031878	-0.388430486	0.398237902
IL1R2	turquoise	-0.154836811	-0.069981796	-0.075961577	0.982197385	0.47835169
SNAPC1	turquoise	0.069158122	-0.177976576	0.191959819	0.299961235	0.013837009
PIGB	turquoise	-0.043431722	-0.318063359	0.01975611	0.796811244	0.297341501
HOXB2	turquoise	-0.460527495	-0.167027069	0.559552026	0.41706883	0.408703442
ISG15	turquoise	-0.146519887	-0.135374355	0.010070122	0.537730706	0.336935714
GNLY	turquoise	0.075768307	-0.417132874	0.32647388	-0.327040333	-0.359777593
TCN1	turquoise	0.158293518	-0.593601786	0.121604022	0.511612571	-0.128722979
AVIL	turquoise	-0.307087956	0.008373779	-0.15352859	0.92575425	0.507361299
ABHD2	turquoise	-0.162169526	-0.116654757	0.031951281	0.942107057	0.491694172
AQP9	turquoise	-0.394755765	0.06486886	-0.250177297	0.857011946	0.546202396
LAMP3	turquoise	-0.347225362	0.068666576	-0.073550589	0.527391417	0.498867518
SNX7	turquoise	-0.209735567	-0.028949104	0.590713619	-0.509618794	0.029166999
ETV6	turquoise	0.538850165	-0.261878619	0.31058653	0.606986654	0.102386819
ZNF652	turquoise	-0.149382805	-0.099299535	0.37934994	0.414348203	0.191416467
CDA	turquoise	0.2086182	-0.346541391	-0.394095429	0.819437988	0.026293808
ALAS1	turquoise	0.562254856	-0.163380281	0.206397587	0.635172881	0.125278988
AOAH	turquoise	0.57744606	-0.374558169	-0.268934391	0.405072304	-0.352253271
REPS2	turquoise	-0.269569752	-0.005169151	0.000919773	0.951276551	0.591932108
C4BPA	turquoise	-0.515061423	0.117008292	-0.421317662	-0.374648675	-0.06616991
OASL	turquoise	-0.401578627	-0.09806521	0.047994019	0.532434415	0.492682615
KIN	turquoise	0.090085797	-0.276899765	-0.169001507	0.933607111	0.250052987
BCL2A1	turquoise	-0.44395272	0.353273376	-0.295606654	0.805684117	0.683070335
CD38	turquoise	-0.099397527	-0.55296598	-0.299530363	0.550298435	-0.210704528
NCOA2	turquoise	-0.051228922	-0.207906976	-0.077416245	0.694680466	0.184475491
IL7R	turquoise	-0.331357444	0.269112315	0.336293503	-0.57944793	0.025719099
CD2	turquoise	-0.235079017	-0.377167471	0.321737086	-0.447839135	-0.205552743
SLC14A1	turquoise	-0.23108306	0.017218375	-0.009086702	0.171590206	0.105099528
S100A12	turquoise	0.381444452	0.181604706	-0.12518192	-0.37494906	-0.271944647
SLC22A4	turquoise	-0.316138584	-0.206417628	-0.21224982	0.876255833	0.381603868
SLC6A6	turquoise	-0.258421184	-0.000946016	-0.208818379	0.884174592	0.476598574
VNN2	turquoise	-0.497515803	-0.299807569	-0.110299232	0.72952659	0.304094609
IL6R	turquoise	-0.100842179	-0.087408051	0.11059869	0.946503333	0.480318785
ADAM28	turquoise	0.188904107	0.462676072	0.017979047	0.197760879	0.269860094
TNFAIP6	turquoise	-0.322165826	-0.018143994	-0.048029455	0.732644977	0.493913467
SELP	turquoise	0.348008546	-0.170001709	-0.029623778	0.463728624	-0.064631676
HCP5	turquoise	-0.100462985	-0.740135001	-0.063979656	0.57971771	-0.171008124
SRSF6	turquoise	0.343217453	0.186591151	0.146281724	0.343583265	0.178424931
XAF1	turquoise	0.294142805	-0.31974246	-0.025471224	0.370500462	0.027934641
ARHGAP6	turquoise	0.275207349	0.174641329	-0.076106067	0.551901258	0.171240456
ARG1	turquoise	-0.173472563	-0.200590355	-0.318801131	0.38077853	-0.093009717
TNFRSF10C	turquoise	-0.288851918	-0.049200694	0.053448795	0.860489559	0.46270948
CR1	turquoise	-0.257642536	0.28563574	-0.013601897	0.767862973	0.695685264
BLK	turquoise	-0.010129566	0.506683326	0.052792543	-0.422670191	0.03308018
PTAFR	turquoise	-0.193028774	0.113426926	-0.048192074	0.913928122	0.568406814
DAPK2	turquoise	-0.307676668	-0.047414713	-0.233598333	0.814873357	0.402139906
IFI16	turquoise	-0.498505322	-0.128874725	0.220714104	0.64028551	0.522378233
SOCS3	turquoise	0.069455423	-0.052010503	-0.087621732	0.528043495	0.193931186
PIK3CG	turquoise	0.081890279	-0.598349615	0.155226967	0.60858724	-0.044995921
FOLR3	turquoise	-0.108247959	-0.060007669	-0.218751436	0.518133496	0.114674505
ANK3	turquoise	0.01608981	-0.175383313	0.332851805	-0.149324711	-0.184440586
PF4	turquoise	0.354631875	-0.18678156	0.394165145	0.043276962	-0.289551424
CD19	turquoise	0.09185299	0.3823626	-0.15312546	-0.540636798	-0.235360684
ASAP2	turquoise	0.43200532	0.168388059	0.233279322	0.421445708	0.163226384
IGSF6	turquoise	0.279421216	-0.116905261	0.080649213	0.85963688	0.314373864
F2RL1	turquoise	-0.198647548	0.061813411	0.110278938	0.747179964	0.456077786
S1PR4	turquoise	-0.308421426	-0.175696936	0.130187914	0.476278513	0.258928274
LIN7A	turquoise	-0.266743088	0.010407847	-0.469797568	0.785651669	0.292373816
PLXNC1	turquoise	0.310178268	-0.342238579	-0.156338685	0.824260027	0.101198741
TLE3	turquoise	-0.240773516	0.148089597	0.099684927	0.912147914	0.681781481
LRRC6	turquoise	-0.143958422	0.485093916	-0.246910759	0.272206439	0.406164739
LAG3	turquoise	-0.015242775	-0.173368481	-0.103361807	-0.351932261	-0.276566274
ITGA2B	turquoise	0.286008757	-0.142539478	0.443244351	0.405766443	0.06820718
AIM2	turquoise	0.307952681	-0.231873654	-0.303695323	0.605740077	-0.024728383
CYP4F3	turquoise	-0.160107074	-0.167017922	-0.243099686	0.946240565	0.393038053
MGAM	turquoise	-0.392308206	-0.076448087	-0.177325587	0.890474467	0.472083098
PTP4A3	turquoise	0.048037032	-0.120363614	0.12503289	0.759774227	0.433403844
LY96	turquoise	-0.224735637	0.322566831	-0.176952463	0.87691182	0.718635028
RPGRIP1	turquoise	0.042141503	0.006816104	0.060647641	0.939210505	0.472130086
PTGER2	turquoise	0.284795279	0.54884156	-0.065566076	-0.583911942	-0.048658921
APOBEC3B	turquoise	0.189332427	-0.099085278	0.276747047	0.31644882	0.204830356
P2RY14	turquoise	-0.297759315	0.363466098	0.179196114	0.638851036	0.731794241
TNFRSF17	turquoise	-0.225046044	0.103088022	-0.144148528	0.305475148	0.325335572
HAL	turquoise	0.037898618	-0.068972563	-0.318650535	0.923915569	0.309485459
APMAP	turquoise	-0.159662631	-0.715488229	-0.069919519	0.562408347	-0.187997397
GZMK	turquoise	-0.293080647	-0.25750484	0.146558365	-0.633609167	-0.348890445
CLEC10A	turquoise	0.543184467	-0.007795514	-0.026877098	-0.582648253	-0.450279758
XK	turquoise	-0.401880679	0.290841554	-0.054824358	0.6505031	0.572918412
RIPOR2	turquoise	-0.162386449	-0.057859673	0.163644235	0.837727427	0.481796395
CHST7	turquoise	-0.156142332	0.073430854	0.138408219	0.857286444	0.550887049
MPPE1	turquoise	-0.016354382	0.062651775	-0.004786606	0.842476226	0.473783402
KCNJ2	turquoise	-0.113865646	-0.428788805	-0.025963353	0.90183405	0.213540304
CD3G	turquoise	-0.217252204	-0.19203751	0.493318243	-0.579192108	-0.172076341
HBD	turquoise	-0.362290636	0.157564284	-0.148099066	0.414921521	0.349897766
MXD1	turquoise	-0.209838583	-0.160931714	0.029098312	0.948400833	0.441104629
CRTAM	turquoise	-0.077407491	-0.122660987	0.403176624	-0.109547866	0.004303625
CCR6	turquoise	-0.126481127	0.07902516	0.289177416	-0.473320851	-0.105443729
PLAGL1	turquoise	0.100844368	0.314305876	0.060566832	0.848325156	0.636319839
CXCR2	turquoise	-0.369301783	0.075928204	-0.048388621	0.925087079	0.615712093
AOC2	turquoise	-0.293834868	0.107244193	-0.00127156	0.9021096	0.649970297
CSF2RA	turquoise	0.593640772	-0.312113022	-0.054959317	0.591634052	-0.139185154
CXCR1	turquoise	-0.313969371	-0.056509194	-0.067587782	0.914961426	0.504433462
ALOX12	turquoise	0.164662583	-0.031314243	0.182880857	0.698898341	0.262418675
PTBP3	turquoise	0.120403552	-0.176291762	-0.059373208	0.890171476	0.331572415
SIGLEC7	turquoise	0.58287673	-0.280278006	-0.12368227	0.599054278	-0.151810893
PRRG4	turquoise	-0.182247355	-0.313067653	-0.075370799	0.912357623	0.350567995
ZNF200	turquoise	-0.186853191	-0.288120246	0.100359933	0.858061622	0.387585519
GK	turquoise	-0.250584875	-0.046952735	0.011633005	0.916944671	0.507178325
GP1BA	turquoise	0.381973843	-0.165384003	0.148066454	0.486442265	0.072432807
TLR6	turquoise	-0.107875855	-0.181983967	-0.242935717	0.877298987	0.274971595
CASP5	turquoise	-0.24284382	0.088070945	0.011069229	0.755246399	0.543707308
CD46	turquoise	-0.122294177	0.187686964	-0.094604823	0.769080978	0.618288915
MPL	turquoise	0.349825033	0.161062314	0.46543604	0.554081664	0.360000732
THEMIS2	turquoise	0.538375777	-0.348743804	-0.258087114	0.626186502	-0.171703802
GADD45B	turquoise	-0.123171263	0.268323302	-0.406605543	0.59206877	0.386549918
SULT1B1	turquoise	-0.173026218	0.401143269	-0.247548582	0.785214484	0.683862249
ADGRE2	turquoise	0.061895947	0.04904253	-0.034139008	0.671147605	0.392317255
CREM	turquoise	-0.100005619	-0.339847255	0.174597719	0.797111419	0.218784658
TNFRSF1A	turquoise	0.137462873	-0.412706716	-0.165063426	0.880448041	0.064426488
BLNK	turquoise	-0.049469849	0.501496811	-0.11621229	-0.1241519	0.146973451
ENTPD1	turquoise	0.430417377	-0.035111053	-0.231563688	0.64289334	0.171503521
KLRC3	turquoise	-0.19658546	-0.241488713	0.351025682	-0.274212874	-0.129778471
FAM214B	turquoise	0.681049166	-0.26742715	-0.297759018	0.499330277	-0.180136582
RBPJ	turquoise	0.045733463	0.340995915	0.107847434	0.816908141	0.705057802
RNF10	turquoise	-0.286636898	0.147772114	-0.200374014	0.653914319	0.393547265
PF4V1	turquoise	-0.320538081	0.342659525	0.471287895	0.327152006	0.581190783
PBXIP1	turquoise	-0.556518004	0.216272704	0.251904211	0.419085312	0.654640574
CD160	turquoise	-0.00988754	0.01627191	-0.34994858	0.61015972	0.114131487
LILRA2	turquoise	0.420773967	-0.173121133	-0.165149338	0.833045885	0.185897261
TNFSF14	turquoise	-0.037814878	-0.707329073	-0.164506082	0.690833623	-0.117164588
CITED2	turquoise	0.030696774	0.677728321	0.26610764	-0.519134172	0.259155268
HCK	turquoise	0.611960099	-0.240262439	-0.191374939	0.685071512	-0.002594605
CEACAM3	turquoise	-0.547375044	0.140640523	-0.069240422	0.761270333	0.620581395
ZBP1	turquoise	-0.436314708	-0.452170651	0.151419079	0.48723953	0.24889359
CYRIA	turquoise	0.280865861	-0.289388415	-0.161408673	0.88064024	0.170228174
NDEL1	turquoise	-0.05755728	-0.460457671	-0.091624096	0.878394614	0.145787632
MED25	turquoise	-0.462989646	0.187055816	-0.314786818	0.701398177	0.584309642
ABCC3	turquoise	0.291248626	0.038404592	0.533608373	0.480980896	0.331706141
KIR2DS1	turquoise	0.099655453	-0.166241423	0.4006223	0.45041877	0.285733894
MEFV	turquoise	0.148938628	-0.223089664	-0.338261148	-0.292700542	-0.624516165
CCR3	turquoise	-0.211994292	0.104985639	0.323841683	0.628301275	0.49625527
IRF7	turquoise	-0.118128574	0.049684014	-0.048719244	0.575211434	0.449817652
CFLAR	turquoise	-0.313231123	-0.28951127	0.107342265	0.875532249	0.439567043
H3C8	turquoise	-0.211067092	0.24496924	0.191323956	0.836087947	0.734174306
H2BC6	turquoise	-0.355734842	0.336359855	0.009296995	0.834376048	0.726590134
H2BC9	turquoise	-0.390730664	0.418876775	0.042927783	0.718139553	0.806195087
H2BS1	turquoise	-0.417106741	0.082263597	-0.019282992	0.863872604	0.561536779
H2AC14	turquoise	-0.474211247	0.248941088	0.096662046	0.815764037	0.708789128
LILRA6	turquoise	0.574082201	0.139944232	-0.296874259	0.517279798	0.113302501
TUBB1	turquoise	0.182945348	0.268765111	0.05913002	0.629939588	0.393905378
ACTN1	turquoise	-0.21997009	0.018625328	0.00571743	0.940501679	0.530593048
SERINC1	turquoise	-0.408902991	0.18620257	0.002545938	0.842271728	0.714168047
PDLIM1	turquoise	0.117122718	0.420980093	-0.010844673	0.364997745	0.294455983
CDC42	turquoise	0.058718058	-0.060871312	0.095721555	-0.286455904	-0.245279039
RAB2A	turquoise	-0.259565791	-0.365252889	-0.462929892	-0.434018397	-0.568797542
FSTL1	turquoise	0.206126005	0.087213883	0.467575109	0.009108903	-0.010623201
GABARAPL1	turquoise	-0.329547342	-0.084344197	-0.221893245	0.764436515	0.398045433
NADK	turquoise	0.179679801	-0.410545581	0.013202221	0.868507422	0.142420761
CRIP2	turquoise	-0.149420004	0.500991736	0.166042524	0.09935859	0.473390384
UCP2	turquoise	0.043346481	-0.341742491	0.401598056	-0.302317697	-0.270860354
DNAJB6	turquoise	0.640594602	-0.221155778	0.062788598	0.683856713	0.044333689
PINK1	turquoise	-0.009412318	-0.00554656	-0.065709017	0.890926448	0.459212348
COL18A1	turquoise	-0.456359437	0.166391971	0.131082424	0.839903241	0.673174193
NCOA1	turquoise	-0.104696082	0.147067502	-0.001309624	0.905427333	0.53563737
WBP2	turquoise	-0.028231746	0.038651637	-0.164672401	0.962216749	0.506412364
NT5C2	turquoise	-0.040549104	0.142825307	0.004608679	0.884392064	0.512836791
AKR1C3	turquoise	0.30437371	-0.353205528	0.128080854	0.679781344	-0.007774641
MBOAT7	turquoise	-0.294937276	0.054998678	-0.150222807	0.932852466	0.580077389
IRS2	turquoise	-0.008363208	0.67216141	-0.000835631	0.383869067	0.55656396
OSBPL2	turquoise	0.024969082	-0.336288678	0.076092181	0.884208321	0.23163569
STX3	turquoise	-0.267881043	-0.205721404	0.006483261	0.929610426	0.425507156
CASP4	turquoise	0.052388447	-0.650342622	0.095338566	0.728388374	-0.072644856
ANXA3	turquoise	-0.14006876	-0.182302786	-0.002639546	0.915202432	0.361048081
IGHM	turquoise	-0.076343781	0.3079704	0.029272228	-0.53598786	-0.159885612
CHI3L1	turquoise	-0.048555159	0.110045725	0.117804389	0.713139166	0.583616786
THOC5	turquoise	-0.170857568	-0.152325853	0.162114985	0.847908686	0.438679157
PLEKHB1	turquoise	-0.149774935	0.502771944	0.41622691	-0.70974636	0.097471091
APOL1	turquoise	0.240857127	-0.684332966	-0.405730458	0.479238689	-0.407934319
CIR1	turquoise	-0.112169886	-0.044087778	0.166598197	0.921962048	0.544112378
IL10RB	turquoise	0.274200129	-0.305460204	-0.137836567	0.718207841	0.147562924
CD200	turquoise	0.119516419	0.323564187	-0.124258918	-0.194797192	-0.106957519
TST	turquoise	0.475908469	0.054484709	-0.019771166	0.665350213	0.176189196
CES1	turquoise	0.330813908	-0.27648268	0.048488762	-0.360351627	-0.425815729
H2BC12	turquoise	-0.517752032	0.274927287	-0.049234221	0.807569346	0.667957299
FRAT2	turquoise	-0.099492379	-0.353393899	-0.209956428	0.884845499	0.250478225
RIT1	turquoise	0.280446459	-0.084646643	-0.19314673	0.868881114	0.235683835
TSPAN5	turquoise	-0.134025271	-0.0074553	-0.019365037	0.425924035	0.209374007
H2BC5	turquoise	-0.210504748	0.242568879	-0.113057411	0.696064543	0.641784582
NFE2	turquoise	0.219959126	-0.493600954	-0.266517727	0.783386649	-0.115528218
CD300A	turquoise	0.381460206	-0.506543537	0.131258231	0.568457608	-0.059716131
NCF2	turquoise	0.264539733	-0.217585166	-0.161878938	0.90614943	0.205588921
KCNJ15	turquoise	-0.376012203	-0.151685604	-0.139613645	0.84260833	0.458600552
TLR1	turquoise	-0.015405256	-0.43081781	-0.089825825	0.915310118	0.189895872
STX11	turquoise	0.427801113	-0.111243274	-0.329709154	0.613186168	0.025939801
LILRA4	turquoise	-0.301780112	0.219836396	-0.068157541	0.367142551	0.439175843
MS4A1	turquoise	0.021721081	0.537612884	0.128099731	-0.633329197	-0.056714967
P2RX5	turquoise	-0.01264641	0.32970648	-0.074587047	-0.421338221	-0.136257011
CYP4F2	turquoise	0.004784314	-0.305214568	-0.10219026	0.943749474	0.279691649
BIRC3	turquoise	-0.169759784	0.142224856	0.366274513	0.067900355	0.282784783
TRIM27	turquoise	0.580757551	-0.320815295	0.017321116	0.661681674	-0.003310677
KLRC4	turquoise	-0.329233857	0.110755117	0.335038818	-0.100645818	0.264828628
ADGRE3	turquoise	-0.357607612	0.192660712	-0.18256775	0.87315503	0.640063366
EPB42	turquoise	-0.427837368	0.160590559	-0.144171071	0.482165157	0.397122813
FPR2	turquoise	-0.157744401	0.046267473	-0.085756846	0.956007015	0.547806114
PLAUR	turquoise	-0.256185209	0.419738545	-0.376310471	0.723956989	0.638310505
RAB11FIP5	turquoise	-0.4190467	-0.164274432	0.109366497	-0.376270147	-0.034929971
FCGR2C	turquoise	-0.198167674	0.088822236	-0.197191598	0.937694992	0.548291394
MGLL	turquoise	0.441376034	-0.351497068	0.29648997	0.601544341	0.041641385
KIR2DS2	turquoise	0.145414659	-0.244489689	0.478949973	0.297640026	0.125958107
ALAS2	turquoise	-0.493282317	0.038710801	-0.204433929	0.397735825	0.295785464
KIR3DL1	turquoise	-0.187105626	-0.242450039	0.354259009	0.102580845	0.027740733
UBE2D1	turquoise	-0.269700592	0.196993259	0.150696394	0.794891471	0.728126765
XPO6	turquoise	-0.424522158	-0.007650168	0.017546286	0.898615431	0.572013583
SLC25A6	turquoise	0.495760855	-0.097796884	0.187959488	-0.801289314	-0.574751255
SDC2	turquoise	-0.09200967	0.145869579	-0.038669717	0.641223759	0.389686061
MT2A	turquoise	0.16825062	-0.064319983	0.165220655	-0.290715091	-0.182214272
SERPINE2	turquoise	0.069009339	-0.082514016	0.146609899	-0.053779004	-0.170666697
IFITM3	turquoise	-0.159599225	-0.075813329	0.033937208	0.855980694	0.523289127
AMPD2	turquoise	-0.191773849	0.414309794	-0.034050379	0.849946011	0.777472728
RBM38	turquoise	-0.555854306	0.184579185	-0.140871419	0.385347793	0.34402261
CEBPB	turquoise	-0.171494662	-0.153181046	-0.252477797	0.901150879	0.318165616
ARAP1	turquoise	0.19429547	-0.361039573	0.043582541	0.780776831	0.194015436
AUTS2	turquoise	-0.0773103	-0.548574103	0.303499833	0.498962608	-0.024064613
RCOR1	turquoise	0.344138048	-0.055984565	-0.02763009	0.793456571	0.250360076
IL1RN	turquoise	-0.255310512	0.388640551	-0.325412268	0.805441278	0.672778893
SYNM	turquoise	-0.060598623	0.143584124	0.12245345	0.153466775	0.000867768
ANKS1A	turquoise	0.6049134	-0.318941191	0.2662778	0.60395266	-0.002456408
JAM3	turquoise	0.244914178	-0.216315629	-0.515821519	0.344264641	-0.29832292
PLEKHG3	turquoise	-0.505447177	-0.121582406	-0.065359107	0.787222504	0.44845511
MEGF9	turquoise	0.380297017	-0.375335538	-0.326951696	0.820734768	-0.028493612
CDS2	turquoise	-0.162603936	0.189260283	-0.030579485	0.832487723	0.643944426
DENND3	turquoise	0.01129907	0.09444221	-0.200297177	0.922507645	0.489985445
KANK1	turquoise	0.309043133	0.290850448	0.465707802	0.286234404	0.417153398
ABHD3	turquoise	-0.50644405	0.123384003	-0.311231915	0.563876459	0.432266918
TMF1	turquoise	0.212697047	0.346723437	0.12929824	0.573780659	0.534687943
RNF19B	turquoise	-0.235319366	0.288548486	-0.082473285	0.883112333	0.730313392
HOXA10	turquoise	-0.54272933	-0.117113375	-0.167176065	-0.237019928	-0.048822409
TRANK1	turquoise	-0.203113513	-0.348370346	0.154148585	0.764970084	0.332092355
ATG2A	turquoise	-0.208483438	-0.35038041	-0.192697393	0.832639194	0.249495549
TMEM158	turquoise	-0.216604814	0.172212608	0.075259226	0.645404427	0.460963846
TMCC1	turquoise	-0.198496225	-0.081993188	-0.348666179	0.840253561	0.362727209
RPS11	turquoise	-0.175486986	-0.183576403	-0.402395776	-0.573783742	-0.582985422
KAZN	turquoise	-0.035461861	-0.199643303	-0.083093637	0.856961955	0.331105096
LIN37	turquoise	0.234411981	-0.006968833	0.450791594	0.7280826	0.45140535
CD3D	turquoise	0.018372259	-0.252801186	0.419461295	-0.589052339	-0.274265239
PDZD8	turquoise	0.083043131	0.11906098	0.211927237	0.763921846	0.61386648
ATP6V0E2	turquoise	-0.245610732	0.108341334	0.097675443	-0.141229524	0.066588669
B3GNTL1	turquoise	0.252319885	0.052963616	-0.090098109	0.597590338	0.190493496
SRRD	turquoise	0.042502077	-0.047551463	0.195512213	0.314435198	0.194516062
PHACTR1	turquoise	-0.252767409	0.395128417	-0.270484991	0.580527515	0.531877741
NUP50	turquoise	-0.029749255	-0.585255295	0.070498311	0.64309853	0.007750461
SECTM1	turquoise	0.195383953	-0.09973909	-0.173561196	0.730972131	0.215930333
GOLGA8N	turquoise	0.116208284	0.237106763	0.353162763	-0.645471065	-0.019143778
RSAD2	turquoise	-0.143998989	-0.175490124	0.097219805	0.492930222	0.325624501
ABHD5	turquoise	-0.159627556	0.08776353	-0.045717291	0.957335862	0.611186131
MYBL1	turquoise	-0.319440425	-0.539608337	0.29666598	0.35001817	-0.032846543
CD7	turquoise	-0.146826429	-0.27011838	-0.224057078	0.60649453	0.010750854
IFI44	turquoise	0.04253281	-0.083731735	0.153878044	0.283991403	0.293179723
PPBP	turquoise	0.532584032	0.203694424	0.220503893	0.183148023	0.006274715
SELENBP1	turquoise	-0.351158276	0.108960524	-0.164379298	0.422329885	0.289835142
HLX	turquoise	0.101809884	-0.374268752	-0.073703912	0.873355667	0.138044361
NAT1	turquoise	0.314919154	-0.658902009	0.168279353	0.62813302	-0.090797943
GPR65	turquoise	-0.048639479	-0.560818452	0.19220794	0.58097827	-0.029879641
ARFIP1	turquoise	0.196867166	-0.562115681	0.119754395	0.669760927	-0.00761659
FCGR1B	turquoise	0.276793102	-0.450225661	0.09011936	0.500855307	-0.12772403
AHCTF1	turquoise	-0.456273452	0.022696054	0.108178354	0.792750217	0.568778198
CEACAM21	turquoise	0.022520607	0.238972156	0.219673296	0.387796073	0.217656002
TRIM58	turquoise	-0.331186328	0.300087377	-0.03540526	0.607470573	0.555740888
H2AC6	turquoise	-0.312233664	0.262167253	0.129859436	0.853744475	0.68460729
SNORA21	turquoise	-0.351543467	0.096484092	0.352762339	0.817552149	0.688342313
MICOS10P1	turquoise	0.106854184	-0.406056652	0.493759919	0.646826885	0.165187687
SPATA5L1	turquoise	0.346630666	-0.234137665	0.146038434	0.750945968	0.293802035
GK3P	turquoise	-0.177028943	0.025953969	0.070788926	0.77732225	0.515271885
YIPF3	turquoise	0.016780358	0.229713414	0.266380542	0.763075193	0.625930785
KIR2DS4	turquoise	-0.021848444	-0.155281602	0.350216329	0.116639811	0.065596253
IFIT2	turquoise	-0.278697655	-0.178301654	0.065721453	0.747584883	0.436290813
ZSCAN18	turquoise	-0.278502224	0.236077647	0.390395432	0.30827666	0.450705976
SPDYE2	turquoise	-0.311961154	0.238556117	0.301888577	-0.065402565	0.171335171
PLEKHA2	turquoise	-0.187835668	0.026399899	0.616177343	-0.2073879	0.185423227
ITM2B	turquoise	-0.485197772	0.422841281	-0.038216204	0.767791354	0.822090091
ADIPOR1	turquoise	-0.353075188	0.185160415	-0.225180299	0.667361727	0.437184511
UBE2J1	turquoise	0.186910219	0.39656098	-0.216165434	0.428734359	0.333924681
METTL9	turquoise	0.23997987	0.503282765	0.117721675	-0.708730787	-0.055796883
AKIRIN1	turquoise	-0.208619472	0.252259713	0.133289413	0.772549584	0.590678934
CFAP20	turquoise	0.149736592	0.648833523	0.147875336	-0.477969198	0.236000601
NOP10	turquoise	0.222254568	-0.592295528	-0.407071014	0.389811052	-0.402018955
NIBAN1	turquoise	-0.254748519	0.048678805	-0.189923504	0.93439589	0.540048638
LAMTOR3	turquoise	0.224908891	-0.54896776	-0.041002983	0.743820486	-0.011387159
DYNC1LI1	turquoise	0.080255906	-0.208360869	-0.26575337	0.852506146	0.197076302
MSRB1	turquoise	-0.133438735	-0.342815336	-0.2669623	0.910100698	0.202838399
PPDPF	turquoise	-0.087598888	0.450513168	0.453896761	-0.520456479	0.155529274
FAM53C	turquoise	-0.377286962	0.186737274	-0.119145709	0.892702498	0.691325016
GIT1	turquoise	-0.589790848	0.124289405	-0.344686725	-0.115137896	0.080777894
SNN	turquoise	0.227685918	-0.008675898	-0.095465248	0.750584999	0.255702219
RBM47	turquoise	-0.00614181	-0.361595926	-0.32254257	0.905030933	0.170971611
FXYD5	turquoise	0.27136909	0.257444508	0.185028293	-0.789168085	-0.303635285
CHMP5	turquoise	-0.18160575	-0.233254876	0.020966218	0.864403716	0.414543491
ASF1B	turquoise	-0.020193949	-0.095454404	-0.044455691	0.828554803	0.46227965
TSEN34	turquoise	-0.039179293	-0.167963104	-0.166800275	0.951078084	0.291442876
SLC25A37	turquoise	-0.451141619	-0.052006401	-0.173972262	0.874749379	0.497139761
TNKS2	turquoise	0.019642718	-0.109130282	0.713467813	-0.023277487	0.051927908
NAGK	turquoise	0.551675258	-0.615991847	-0.294257929	0.552900892	-0.381739541
RUFY1	turquoise	0.320268958	0.137640565	0.264677927	0.327449423	0.115889812
MID1IP1	turquoise	0.212456693	0.109941294	-0.200909183	0.682477011	0.349518797
OSBPL11	turquoise	0.24315799	-0.143997102	-0.136488052	0.854428336	0.274551098
SESN1	turquoise	-0.140820507	0.691033939	0.092836959	-0.493264567	0.204276245
OAS3	turquoise	0.057596692	-0.005951453	-0.079035821	0.300290289	0.242793176
SNX10	turquoise	0.11489631	0.331270924	-0.055941915	0.780274854	0.560286236
TMEM14A	turquoise	-0.488183928	-0.137802831	0.369987056	-0.492553355	-0.070280511
SDAD1	turquoise	0.278496793	-0.342709551	0.417584394	-0.326550017	-0.351979041
CPPED1	turquoise	-0.274415945	0.24196274	0.031695019	0.880648305	0.722399265
RESF1	turquoise	-0.336267627	-0.231539937	0.12809457	0.813908962	0.393973072
CENPBD1P1	turquoise	0.58077426	0.105157046	0.2599372	0.365308182	0.132007762
DYSF	turquoise	0.104529959	-0.294186941	-0.45496385	0.742963627	0.042127833
TTC27	turquoise	0.003021329	-0.116325154	-0.005083988	-0.469760551	-0.387812549
CAVIN2	turquoise	0.525430897	0.199706965	0.258226763	0.373098522	0.128915653
LXN	turquoise	-0.297792952	0.023794716	-0.091420807	0.91573427	0.517900885
MSRB2	turquoise	0.439119445	-0.411100237	-0.465693253	0.529270386	-0.248781634
VAV3	turquoise	0.31082015	0.304613339	0.080712284	0.368303206	0.192662329
FCGRT	turquoise	0.646704003	-0.025974051	-0.206226593	0.3258644	-0.187852198
IGF2BP2	turquoise	0.199164509	0.005557978	-0.043096566	0.442399923	0.062925551
NOTCH1	turquoise	-0.449495862	-0.051490284	0.103633274	0.789708514	0.504817613
CTBS	turquoise	-0.252664294	0.354364166	-0.149592255	0.780448473	0.670172233
EHD3	turquoise	0.479563309	0.31158096	-0.103533431	0.294142344	0.078271934
DDX58	turquoise	-0.160812696	-0.114082865	0.418089257	0.723099882	0.557096164
ARAP3	turquoise	0.036005529	0.071973502	-0.193297246	0.939678451	0.459288855
KRT23	turquoise	-0.406657272	0.470461697	-0.306481699	0.595213955	0.703088874
RMI1	turquoise	0.446273951	-0.64894143	0.12848792	0.612905079	-0.190681041
C1RL	turquoise	0.020957679	0.069554932	0.248263226	0.912637785	0.609372004
DDX60	turquoise	0.080941443	-0.579036573	0.115986349	0.409694822	-0.108263624
TMEM140	turquoise	-0.221172994	-0.339204577	-0.249815699	0.860914128	0.234133095
ZCCHC2	turquoise	-0.414608534	0.11558229	-0.006772884	0.711077146	0.626244435
PPCDC	turquoise	-0.022721298	-0.184646069	0.031297337	0.96174126	0.421069817
PELI2	turquoise	0.245074044	-0.115765521	-0.022025853	0.764886829	0.175653833
KLHL2	turquoise	0.252783418	0.011759533	-0.075562198	0.84765077	0.321250144
TIMM22	turquoise	0.281385919	0.196805097	0.003948326	-0.302152962	-0.043051158
RAB8B	turquoise	0.499406296	-0.602422516	-0.043781617	0.632715817	-0.162610758
CCNJL	turquoise	-0.124633556	-0.211897307	0.027483406	0.60693573	0.174642361
CEP63	turquoise	-0.095260207	0.083085498	0.003225364	0.946706614	0.592723415
GIMAP4	turquoise	0.218995118	-0.756257837	-0.262291653	0.382348745	-0.429690056
C1GALT1C1	turquoise	0.384767554	-0.425267066	0.084116455	0.765338809	0.007230112
HSPBAP1	turquoise	0.29077311	-0.196882047	0.120477289	0.851510993	0.260103776
TMEM204	turquoise	-0.356265607	0.10163588	0.413617942	-0.422082105	-0.062384182
PGGHG	turquoise	-0.409513766	0.026546961	0.450591133	0.478344194	0.574891249
KLF2	turquoise	-0.185613268	0.010699359	-0.105128246	0.809794315	0.475547021
PGS1	turquoise	0.006592992	-0.041435346	-0.056060673	0.788161826	0.305785372
TREM1	turquoise	-0.394691687	0.417171588	-0.291294795	0.689371811	0.691144927
C1GALT1	turquoise	-0.139158661	0.070041847	0.347354463	0.597434528	0.633352539
DPEP2	turquoise	-0.210388325	-0.136800374	-0.000851256	0.964486992	0.44793849
RUBCNL	turquoise	-0.249980795	0.032160515	-0.196359915	0.521713113	0.27029453
CHIC2	turquoise	-0.106805032	-0.463376331	-0.012244552	0.817074713	0.181458724
WWC3	turquoise	-0.216062422	-0.202084248	0.026317007	0.901819125	0.427522242
B3GAT1	turquoise	-0.202660632	-0.41134195	0.508952171	-0.413393651	-0.257108768
SLC47A1	turquoise	0.193950319	0.07459861	-0.234950458	0.341687199	0.173364008
CLIC3	turquoise	0.115567311	-0.412835219	0.074213785	0.6649715	-0.029008705
ZNF267	turquoise	0.10237176	-0.232023185	0.04819598	0.91529129	0.34962864
OGFRL1	turquoise	-0.005783805	0.249133375	-0.232893407	0.829697341	0.473840248
NINJ2	turquoise	0.352161279	-0.126293945	0.046651992	0.712532197	0.2444957
MS4A6A	turquoise	0.56323402	0.083583155	0.119052753	-0.661548194	-0.389395435
AHSP	turquoise	-0.338004038	0.078574008	-0.166789371	0.497705332	0.311997281
RAB11FIP1	turquoise	-0.201677663	0.486513528	-0.031822803	0.643443435	0.80430515
SAMD9	turquoise	-0.124236313	-0.4382361	0.009116112	0.747923691	0.216528286
TREML2	turquoise	-0.17723264	-0.189761513	-0.094661283	0.884416323	0.338524672
PILRA	turquoise	0.514286573	-0.224009774	-0.288176398	0.70326266	-0.00357884
DHRS9	turquoise	-0.131477456	-0.13348658	-0.011297347	0.906490487	0.392806443
MBNL3	turquoise	-0.151456544	-0.046846234	-0.09648962	0.362785429	0.115002259
CLEC4E	turquoise	-0.230720746	0.069533388	-0.253910183	0.715802973	0.352433929
NARF	turquoise	-0.192799425	-0.191555427	0.041250562	0.869103041	0.343397989
HERC5	turquoise	-0.113823987	-0.10206271	0.103973766	0.592900314	0.4061616
SLFN12	turquoise	0.129899361	-0.299764102	0.508226191	0.577931164	0.312726086
FRAT1	turquoise	-0.003963611	-0.225566948	-0.092882053	0.87180139	0.339559759
TM6SF1	turquoise	0.329996591	-0.068757082	-0.277544498	0.692636212	0.073145351
CLEC4A	turquoise	0.533753053	0.267933866	0.13016904	0.548702506	0.311407232
LGALSL	turquoise	-0.160916603	0.291299983	0.236814992	0.345269927	0.377075714
P2RY13	turquoise	0.008415306	-0.230387224	-0.289159861	0.929258961	0.262678676
APOBR	turquoise	-0.11065636	-0.270915917	0.103279043	0.755931794	0.20026638
NOD2	turquoise	0.48269811	-0.369046515	-0.177582291	0.768648865	-0.057165748
VPREB3	turquoise	0.249691735	0.121794977	-0.308029441	-0.514098783	-0.357580977
C5AR1	turquoise	-0.321296932	0.259937309	-0.154031363	0.841510948	0.680600437
DPEP3	turquoise	-0.229031044	-0.041488324	-0.075278234	0.749709145	0.342815219
STEAP4	turquoise	-0.063740636	-0.039537879	0.004028862	0.887436115	0.439237444
LRIF1	turquoise	0.169756624	-0.286865449	0.517234877	0.594945897	0.291535948
CAMK1D	turquoise	-0.212574098	0.269293948	0.38164313	0.767165822	0.751169831
ARHGEF40	turquoise	0.056071496	0.298304554	0.190928548	0.728783392	0.582378924
GP6	turquoise	0.003491066	0.379532563	0.477788057	0.165352101	0.337660413
NME8	turquoise	-0.074278605	0.346352098	0.471396412	0.562228506	0.611186409
UBASH3A	turquoise	-0.205082107	-0.052756274	0.687867355	-0.198030995	0.145020441
BTNL8	turquoise	0.265576985	-0.461106835	-0.129827441	0.657139464	-0.001704928
SIRPG	turquoise	-0.09293441	0.023539273	0.30255294	-0.546672326	-0.192849776
CLEC1B	turquoise	0.311659725	-0.162387698	0.21653762	0.242039723	-0.119167425
SLC12A6	turquoise	-0.264515658	0.277543286	0.017955552	0.838578828	0.707958496
KIF13A	turquoise	0.236364445	-0.176470985	-0.195030569	0.837263003	0.167819964
UTS2	turquoise	-0.060190596	0.233431788	-0.102682688	-0.012246348	0.15050934
HBQ1	turquoise	-0.441781648	0.147903126	-0.087646034	0.584685234	0.477906977
TLR8	turquoise	0.265132212	-0.491523592	-0.195676572	0.81078162	-0.039457781
TUT7	turquoise	-0.013024395	-0.406427243	-0.078768915	0.913916888	0.175048257
ANKRD36B	turquoise	-0.27221251	0.243494497	0.358173644	-0.643042839	-0.055394537
MANSC1	turquoise	-0.511813017	-0.037917014	-0.232441144	0.829768774	0.465606831
ITM2C	turquoise	-0.229687687	0.299674063	-0.053145616	0.58030201	0.576625922
SNX27	turquoise	0.501977018	-0.450323516	-0.28891619	0.573639939	-0.120349934
ASAP1	turquoise	0.392628198	0.199115738	-0.008742873	0.577870657	0.264104396
CKLF	turquoise	0.097439561	-0.40614931	-0.10919852	0.838905788	0.053511967
CCPG1	turquoise	-0.273582364	0.339384474	-0.120439711	0.785507632	0.728342615
MSANTD2	turquoise	0.468147188	0.134281943	0.436527347	0.43583756	0.34076915
NPL	turquoise	0.210749245	0.075571733	-0.197624725	0.851861547	0.330392473
FFAR2	turquoise	-0.383432664	-0.082355881	-0.182673454	0.877859548	0.498427048
B4GALT5	turquoise	-0.082378345	-0.405825354	-0.382009131	0.63148222	0.013645872
EGLN1	turquoise	-0.434826334	0.320725582	0.019241137	0.862470363	0.783275768
RRAGD	turquoise	0.023817705	-0.149759369	-0.129555643	0.873344815	0.241377002
F11R	turquoise	-0.016884153	-0.191512456	-0.048582552	0.891590442	0.350500732
CORO1C	turquoise	0.527187163	-0.135929133	-0.132289236	0.665051254	0.053231574
JMJD1C	turquoise	-0.293971884	0.447564448	0.018395596	0.782078248	0.851864616
R3HDM4	turquoise	-0.403202399	0.219076313	0.083538247	0.886972737	0.719335617
NRBF2	turquoise	-0.232799882	-0.24718194	-0.059785234	0.944035208	0.404800481
MARCHF8	turquoise	-0.481927189	0.066546936	0.015712381	0.672854549	0.491581548
MINDY1	turquoise	-0.437781331	0.100856586	-0.151887829	0.660547135	0.520517563
MOSPD2	turquoise	0.544289612	-0.496350293	-0.094146655	0.533560382	-0.186396888
GLRX5	turquoise	-0.293018774	-0.077220697	0.008484042	0.297735732	0.090393475
WLS	turquoise	-0.022364626	0.143935349	-0.291937515	0.764308028	0.400738505
C19orf54	turquoise	0.139039403	-0.026349822	0.273254958	0.321842855	0.345211638
ERV3-2	turquoise	0.075169002	0.342064364	0.435173079	0.540971075	0.59772062
ADAMTS1	turquoise	0.492174047	-0.359411767	-0.096154082	0.691836908	-0.012758827
LPCAT2	turquoise	-0.090599842	0.142978818	0.001438746	0.895748993	0.614683018
CENPK	turquoise	-0.244585361	0.048543227	0.101693618	-0.386993836	0.029759152
FLVCR1	turquoise	-0.121671478	-0.047682032	0.64653771	0.327410075	0.41835207
KCNE3	turquoise	0.424815549	0.019467156	0.259464089	0.607320401	0.290804871
SLC40A1	turquoise	-0.113867355	0.022649625	-0.175833368	0.946042457	0.477854214
MFSD14B	turquoise	0.093537451	-0.135167338	0.062708782	0.333867455	-0.040650651
STARD10	turquoise	0.318217395	0.193374828	0.069452598	0.651755991	0.469301344
TMEM14C	turquoise	0.273008186	0.683477898	0.165968161	-0.562711369	0.160780896
YPEL3	turquoise	-0.347162467	0.146394346	-0.013975135	0.926448738	0.667094696
PARP9	turquoise	-0.102136493	-0.400119375	0.027106746	0.767929439	0.237306271
GSKIP	turquoise	-0.056539054	-0.400635455	0.093339039	0.796654572	0.259070378
STRBP	turquoise	0.026127947	0.719585107	0.288098972	-0.331886302	0.300167716
STRADB	turquoise	-0.353509807	0.267438647	-0.166945626	0.402861756	0.365086548
USP38	turquoise	0.11295449	-0.330428005	0.273211873	0.721783628	0.238547666
NT5C3A	turquoise	-0.325455783	0.280196275	0.228349378	0.661797097	0.606797958
KBTBD7	turquoise	-0.012266838	-0.147841021	0.253649325	0.666486862	0.345816237
GPR160	turquoise	0.096367182	-0.149661502	-0.500067787	0.286537065	-0.098957142
CXCL16	turquoise	-0.05251299	0.239560846	-0.263629483	0.718934664	0.498261873
LRRC4	turquoise	-0.197357266	0.0705597	-0.097907797	0.9401295	0.57247698
PLPP5	turquoise	0.314421458	0.32266512	0.369644083	-0.021748458	0.167988183
TNFAIP8L2	turquoise	0.476840286	-0.729081687	-0.200758161	0.546991435	-0.347509146
ZNF700	turquoise	0.355755276	0.185242349	0.530049811	0.43355372	0.350976254
ROPN1L	turquoise	-0.473894769	-0.093279601	-0.302090129	0.747799295	0.354110675
SLC25A39	turquoise	-0.468565052	0.120223035	-0.115292426	0.297508903	0.292188341
HEMGN	turquoise	-0.193234721	0.40101279	0.138308878	0.504989352	0.50543349
ACRBP	turquoise	0.172052779	0.446141835	0.129343652	0.405110272	0.397321679
C2orf88	turquoise	0.109777733	0.498258064	-0.144656006	0.555707943	0.478739487
RGS18	turquoise	0.369286972	0.145474749	0.014343209	0.643640927	0.273581394
FGFBP2	turquoise	-0.3664152	-0.010172342	0.457532332	-0.450750848	-0.032584263
ERGIC1	turquoise	-0.071176878	0.084733915	-0.207737865	0.905308457	0.498418979
STK40	turquoise	-0.299358399	0.096023655	-0.168657226	0.945290007	0.582121682
FLYWCH1	turquoise	-0.038268536	-0.143968272	0.197456836	-0.3766359	-0.290384265
DGAT2	turquoise	-0.224202258	0.002881618	-0.118956993	0.915210845	0.481227419
MAP1LC3A	turquoise	-0.540997396	0.283377162	-0.266792011	0.726787532	0.611734867
CARD6	turquoise	0.429031973	-0.613375758	-0.183844038	0.724352258	-0.173743437
CDCA7	turquoise	-0.065188573	-0.14336608	-0.055401258	0.386825751	0.299568818
GPAT3	turquoise	0.088631922	-0.030515287	-0.077383163	0.852865458	0.327868047
IRAG1	turquoise	0.231457526	-0.187107243	0.14034438	0.738626882	0.291239427
SLC44A2	turquoise	-0.295317157	0.070714208	0.074666819	0.878379649	0.566231122
FAM210B	turquoise	-0.502909083	0.265561015	-0.135714275	0.260103843	0.390003545
PARP14	turquoise	0.234308455	-0.340547461	0.036179363	0.276098246	0.001013283
CYSTM1	turquoise	0.127291463	-0.136296109	-0.149558033	0.822002816	0.283059066
C12orf57	turquoise	-0.63939449	0.05982522	0.225077431	-0.577945032	0.020910634
TMEM263	turquoise	-0.374223067	0.113053985	0.41194564	0.626507698	0.69502604
DCAF12	turquoise	-0.299296309	-0.103310488	-0.193106884	0.629494702	0.268772663
ARRDC3	turquoise	-0.424146818	-0.119430258	-0.177902279	0.724877683	0.456103232
DNTTIP1	turquoise	0.354970903	-0.511871113	-0.036368345	0.723043315	-0.111542391
CPEB4	turquoise	0.223349087	-0.197667601	0.147471372	0.801379709	0.191486237
TP53INP2	turquoise	-0.513150724	0.307254833	-0.146969027	0.741397206	0.69430585
PREX1	turquoise	-0.141307654	-0.343589054	0.171946914	0.893842604	0.310375958
SLC15A4	turquoise	-0.010536215	-0.219236071	-0.138706816	0.80235243	0.195200088
NT5C3B	turquoise	-0.33377246	0.200513624	0.04167758	-0.694815766	-0.079965387
ZNFX1	turquoise	-0.094324822	-0.424556484	0.118519216	0.74534851	0.263910556
CDCA7L	turquoise	0.005406846	0.559601361	0.029457544	-0.534817967	-0.037849417
COPRS	turquoise	0.43823484	0.27944547	0.193572926	-0.551352827	-0.208667945
RAB24	turquoise	0.540482565	-0.379641409	-0.054531244	0.666165412	-0.088939651
SRXN1	turquoise	-0.129255733	-0.317706117	0.037677517	0.741655375	0.291602722
SH3BGRL2	turquoise	0.210778143	0.065244532	0.464007459	0.399497411	0.19454097
RNF149	turquoise	-0.23790406	-0.165570022	-0.084596094	0.946541723	0.458446112
INAFM2	turquoise	0.691974216	-0.036605342	0.099834232	0.525782178	0.049565627
ITPRIP	turquoise	-0.44245519	0.304053799	-0.075909793	0.834281263	0.714732525
SLC45A4	turquoise	-0.38079654	-0.042987812	-0.112293413	0.937618687	0.513701119
DPY19L3	turquoise	0.516077813	-0.115480697	0.07336167	0.626192388	0.105061458
SPOPL	turquoise	0.124278733	-0.041134769	-0.058720664	0.84899813	0.443380863
RNA45SN5	turquoise	0.00332801	-0.154804655	0.151373918	-0.51347644	-0.314119481
TSPAN33	turquoise	0.217773453	0.196327735	0.339354166	0.27853938	0.195001858
SMDT1	turquoise	0.026735721	-0.00152068	0.124821611	-0.647859994	-0.376249494
BOD1L1	turquoise	-0.101113825	-0.342093197	-0.058355309	0.902237548	0.245547363
ATG16L2	turquoise	-0.17518885	-0.088318792	0.028545006	0.962410593	0.482407481
EIF4E3	turquoise	-0.121952117	0.13392153	-0.402705225	0.669304289	0.404288152
MIDN	turquoise	0.011784469	0.087895769	-0.381950767	0.738186598	0.360942938
MTURN	turquoise	0.092411903	0.29344559	0.272570643	0.639769391	0.568155901
SLC49A4	turquoise	0.493217544	-0.203860492	-0.041053199	0.718045719	0.056240284
TTC7B	turquoise	0.2609401	0.309042995	0.245722334	0.51750343	0.381076255
SBF2	turquoise	0.555842107	0.224132652	-0.063292011	0.56408228	0.287740174
TMEM45B	turquoise	-0.492181587	0.240451912	0.160540215	0.779205158	0.753373447
RUNDC1	turquoise	0.248486752	-0.656886981	-0.01868799	0.740021654	-0.06740715
ALYREF	turquoise	0.613450357	-0.002636779	0.230527718	-0.439755553	-0.325313483
LYSMD3	turquoise	0.173333564	-0.406844028	0.209679082	0.649938489	0.188005325
AHSA2P	turquoise	0.282862882	0.263247092	0.49290083	-0.306222559	0.111049725
PIP4P2	turquoise	-0.063091844	0.216143323	-0.008965603	0.93282546	0.66331793
ABTB1	turquoise	-0.158371104	0.076824692	-0.061536418	0.936193658	0.571070944
TMCC3	turquoise	-0.09892863	-0.384156329	-0.054480395	0.912096061	0.231261413
HEATR5A	turquoise	0.328646022	-0.007871069	0.332431769	0.732377608	0.407720181
SAMD9L	turquoise	-0.026767735	-0.60259673	-0.067272236	0.588992514	-0.027735387
MUC20	turquoise	-0.192255253	0.568275666	0.345781594	-0.705905685	0.163587607
CMPK2	turquoise	0.10668382	-0.01779967	-0.132025271	0.343313688	0.238995338
LYSMD2	turquoise	-0.17027256	-0.551494722	-0.163933466	0.745105099	0.072720091
FAM174A	turquoise	-0.39187543	-0.071314797	-0.121899463	0.786979033	0.468952279
EMB	turquoise	0.106205543	-0.157481702	0.425176428	-0.744853255	-0.463769463
STXBP5	turquoise	-0.234032469	0.228812983	0.081950711	0.865084301	0.680061134
SUMF1	turquoise	0.492771336	0.33866749	-0.076878627	-0.603903222	-0.254980471
RFLNB	turquoise	0.205364594	-0.144787778	-0.425107639	0.580812143	-0.106946151
CPEB2	turquoise	-0.119466171	0.354312145	-0.030397112	0.849645148	0.698345726
MED11	turquoise	0.334358483	-0.690363271	-0.006153311	0.640937254	-0.175998363
ZBTB41	turquoise	0.25034483	0.15122361	0.469746533	0.499979323	0.52998016
CCDC146	turquoise	0.281871543	-0.053778913	-0.097472028	0.772546908	0.214098166
ZBTB34	turquoise	0.191312564	0.163633079	0.058549378	0.878312327	0.553293614
LINC01000	turquoise	-0.133482349	0.287042609	0.096273753	0.788532638	0.715236495
ELOVL7	turquoise	0.268802087	-0.187989957	0.130012341	0.383035671	-0.142834012
NFXL1	turquoise	0.025968316	0.145126768	0.261539686	0.829181297	0.559987384
IKBIP	turquoise	-0.245346451	-0.015489877	-0.192538284	0.911004784	0.507526797
APTR	turquoise	0.054756302	-0.072251635	0.332538385	0.741836537	0.356535193
CMBL	turquoise	-0.3254857	0.167423459	-0.071467403	0.419954651	0.308039677
EPSTI1	turquoise	0.140738441	-0.297464236	0.079233838	0.237631113	0.022294431
THAP5	turquoise	-0.214678006	0.118788634	0.076125045	0.866027664	0.644598101
EBF1	turquoise	0.140879917	0.3202491	0.025594628	-0.373680241	-0.117433796
GTSF1	turquoise	0.077194465	0.009095889	0.335682941	-0.524751404	-0.254870941
LGR6	turquoise	-0.091628258	-0.378075481	0.123402506	0.460641894	-0.027697472
GSEC	turquoise	-0.169500473	-0.2203978	0.089257486	0.914981899	0.4318044
SLU7	turquoise	0.015894586	-0.342690947	0.278429121	0.756112994	0.334182792
RARA-AS1	turquoise	0.063750261	-0.412507613	-0.144788275	0.845948326	0.139232792
NAPSB	turquoise	0.238010544	-0.078573084	-0.251204626	-0.290724051	-0.32774811
JAML	turquoise	0.24594925	-0.148547278	-0.27483064	0.807438121	0.14388453
PPM1L	turquoise	0.305951579	0.053557626	0.474866208	-0.357595929	-0.043456372
HELZ2	turquoise	-0.023614977	0.228552471	-8.15E-05	0.687182489	0.587847855
CMC1	turquoise	-0.13364745	0.056722784	-0.458769609	0.23316616	0.03453409
RBM43	turquoise	-0.549205001	0.263127367	-0.117540381	0.264306847	0.493735577
CLHC1	turquoise	0.208326727	0.086670339	0.264154791	0.401093849	0.295568898
GGTA1	turquoise	0.128692206	-0.337793673	0.42046565	-0.032011971	-0.304781883
LOC643072	turquoise	-0.192642492	-0.132243923	-0.193347999	0.792036594	0.393672234
BATF2	turquoise	0.221263423	-0.586965766	0.036544175	0.678129813	-0.035913316
SLC22A15	turquoise	0.608795614	-0.05925395	-0.199293153	0.498259344	-0.091883469
LRG1	turquoise	-0.281124503	-0.083083491	-0.343516585	0.861569103	0.356372135
NHS	turquoise	0.44102064	-0.269409097	-0.050033894	0.755635061	0.122653815
CARNS1	turquoise	0.024376752	0.188765598	0.502945284	-0.587443596	-0.061966051
TMEM88	turquoise	-0.162936611	0.014787173	-0.415874401	0.819705602	0.333922781
LRRK2	turquoise	-0.037400059	-0.109346935	-0.277880947	0.924457374	0.288307247
GBP5	turquoise	-0.186492447	-0.404637642	0.17315353	0.646997223	0.124733194
SMIM5	turquoise	-0.285952425	0.386164524	-0.32029387	0.475770043	0.474517064
GLT1D1	turquoise	-0.200905465	0.067544974	-0.078974586	0.963432465	0.577557765
TIGD3	turquoise	-0.223478744	-0.154021865	0.019739956	0.914381074	0.425637405
TMEM91	turquoise	0.278189602	0.183539596	-0.238851476	0.683022777	0.288683569
CMTM2	turquoise	-0.342955382	-0.022704103	-0.238588912	0.876930476	0.467426084
LOC102724851	turquoise	-0.012951958	-0.175688359	0.433443207	-0.116008201	-0.09695635
LINC00926	turquoise	0.117320471	0.376777714	0.252969541	-0.335657991	-0.001242294
NUMB	turquoise	0.072022923	0.123311285	0.021165829	0.886866269	0.50796604
LOC145474	turquoise	0.067400733	0.249310218	-0.009408964	0.763353703	0.53957487
ZNF683	turquoise	-0.541976788	-0.163006747	0.228331005	-0.460824812	-0.088774375
CMTM5	turquoise	0.160439689	0.166122138	0.309684807	0.200537749	0.112077147
GPR155	turquoise	-0.089708927	-0.027537428	0.694469804	0.525629115	0.527010007
ZFP57	turquoise	0.396719556	-0.385877358	0.29415337	-0.554014664	-0.610833971
NOG	turquoise	-0.553327286	0.179081172	0.473609403	0.344999692	0.591518729
SLC22A16	turquoise	0.331549123	0.281736014	-0.356448317	-0.452348219	-0.130329333
ZNF880	turquoise	-0.066247517	-0.328022167	-0.01572869	0.381784394	-0.095216092
CREB5	turquoise	-0.074370166	-0.468984972	-0.143133593	0.805273246	0.095938957
PROK2	turquoise	-0.471430849	-0.005086774	-0.104341566	0.800300184	0.585718939
OR52K3P	turquoise	0.006735727	0.134518974	-0.070065198	0.845862195	0.485917141
NTNG2	turquoise	-0.27419589	-0.242320954	0.255717034	0.753865299	0.434745598
LOC100505874	turquoise	0.071615032	0.023550388	-0.263196818	0.400592116	0.232927965
CMTM8	turquoise	-0.447615083	0.345035183	0.101737693	0.469791275	0.61493266
FLVCR1-DT	turquoise	0.261378101	-0.29218899	-0.121168025	0.455340308	-0.003324599
LINC01003	turquoise	0.270070133	0.054944075	0.548513858	0.4221001	0.298944177
GBP4	turquoise	0.164631414	-0.520707278	0.180891141	0.463441938	-0.113080869
FCRLA	turquoise	-0.116339336	0.173661795	-0.355230609	-0.47774697	-0.285451442
ASPRV1	turquoise	-0.484938995	0.054941424	-0.203163717	0.811086808	0.600440184
SNORD89	turquoise	-0.425499208	0.351358323	-0.190119864	0.80360483	0.762367118
PAXIP1-DT	turquoise	0.249357285	0.152675215	0.659306296	-0.364263492	-0.00268916
REM2	turquoise	-0.396441391	0.243947268	0.023800606	0.845939882	0.748977335
ZNF182	turquoise	-0.119443825	-0.152559215	0.697656968	0.521432417	0.455508464
FCRL1	turquoise	0.098929398	0.404532361	0.00027397	-0.191972638	0.083034173
H2BC4	turquoise	-0.29408401	0.241036716	0.066614046	0.884126891	0.750657946
LINC01215	turquoise	-0.104566223	0.773174184	0.39115524	-0.117637296	0.532925011
MIR646HG	turquoise	0.236594025	0.005933953	0.661258553	0.420892083	0.286945026
B3GNT8	turquoise	-0.275734356	0.338703695	-0.086638711	0.722241177	0.568969791
MLKL	turquoise	0.408871574	-0.354740051	-0.175587267	0.772041799	-0.00773758
TMEM154	turquoise	-0.288149799	-0.054156584	-0.004319547	0.888570212	0.458767009
ZNF818P	turquoise	-0.350890136	0.154322284	0.20716749	0.385176403	0.470425956
TMEM71	turquoise	-0.34619152	0.150618412	-0.019764262	0.830078124	0.592279819
HBM	turquoise	-0.39465291	0.176422	-0.209946258	0.460835823	0.382284545
SCARNA17	turquoise	-0.216357743	0.394074173	-0.073027781	0.483667249	0.545511276
RASGRP4	turquoise	0.153327084	0.238339516	0.051199702	0.704572248	0.54666241
TRBV27	turquoise	0.063300257	0.113832188	0.545057456	0.589865312	0.418810529
ANKRD20A11P	turquoise	-0.289388305	0.2047569	-0.220556067	0.109015374	0.253995119
ZNF600	turquoise	0.057027933	-0.119986135	-0.14303937	-0.055331381	-0.194830731
RPL36A	turquoise	0.269123545	0.395231274	-0.008503417	0.491851188	0.362637952
LOC100507006	turquoise	-0.324323877	0.118189787	-0.050206658	0.933947254	0.599695814
SDE2	yellow	-0.268601298	0.652805282	-0.13472316	0.562195101	0.728126137
MACROD2	yellow	0.452080855	-0.790565109	-0.131337498	-0.40919809	-0.92548704
PDZK1IP1	yellow	0.028629126	0.457627495	0.239225979	0.555373894	0.603771903
FAM126B	yellow	-0.557969605	0.528226594	-0.019946679	0.637152655	0.905336474
JPX	yellow	-0.430152475	0.391291494	0.348429931	0.228916112	0.741451249
SPAG9	yellow	-0.736629008	0.291376524	0.184481572	0.503452058	0.720526999
GGA1	yellow	-0.360198086	0.551074086	0.547992201	0.432402528	0.865847748
IREB2	yellow	-0.284268743	0.288339499	0.736098586	0.282077933	0.623713444
LINC00408	yellow	0.354475766	-0.690926352	-0.200272631	-0.485912759	-0.937320163
CDC42-IT1	yellow	-0.269692966	0.412582021	0.17196548	0.631917051	0.769718193
TNRC6B	yellow	-0.630155164	0.646819472	0.487172058	0.302277266	0.918918849
ORAI2	yellow	-0.605783589	0.391050937	0.242695282	0.64307153	0.873227426
BORCS5	yellow	-0.441679443	0.63712677	0.40854873	0.139109436	0.804788324
RRP12	yellow	-0.621847218	0.212169486	0.294891242	0.607586313	0.76971742
ANKRD20A5P	yellow	0.15263359	-0.638159264	-0.213021803	-0.549988673	-0.909686567
ATXN1	yellow	-0.144515269	0.383010676	0.26709342	0.515370938	0.756139383
LOC399900	yellow	-0.111180428	0.588556261	-0.150943263	0.635746605	0.744233194
CCND3	yellow	-0.121331944	0.405145511	0.779387894	0.059030545	0.552079467
ELL	yellow	-0.259085897	0.474757474	0.069338471	0.714567566	0.754881973
PPP6R2	yellow	-0.620781594	0.445994781	0.47577205	0.278437431	0.859542596
PTP4A1	yellow	-0.343759577	0.621583257	-0.055105963	0.587458703	0.846428946
SRPRA	yellow	0.45434066	-0.842999326	-0.154319708	-0.170153931	-0.847306532
IGFBP7	yellow	0.566547851	-0.353788248	-0.058108771	-0.307304803	-0.712170887
SEPTIN11	yellow	-0.668535994	0.428962843	0.258573871	0.340353656	0.8005671
ZFP36	yellow	-0.117719588	0.658284686	-0.303622322	0.517576556	0.656700841
MARCKS	yellow	0.298800571	0.473509097	0.019124944	0.287576607	0.486759942
RANBP2	yellow	0.297541301	-0.453311862	0.216808403	-0.058602309	-0.495020384
TWF1	yellow	-0.443341334	0.870236271	0.231136807	0.157371328	0.918221111
IFRD1	yellow	-0.540792465	0.398807447	0.160610045	0.638356858	0.870211921
CREBBP	yellow	-0.502471498	0.607712595	0.046058821	0.619379816	0.888462201
AMFR	yellow	0.127674745	0.444257428	0.297305081	0.217479831	0.591426305
DENND2B	yellow	0.580749482	-0.603743641	-0.144415527	-0.316956011	-0.830429751
ICAM1	yellow	-0.088309165	0.682566814	-0.312658892	0.46489918	0.619530635
FOSB	yellow	-0.121186051	0.425582958	-0.080807075	0.3195402	0.562100422
CXCL8	yellow	-0.521498043	0.68885456	-0.026702905	0.525553005	0.825144272
RAPGEF2	yellow	-0.341643671	0.460150415	0.048532577	0.766299936	0.842858953
CPT1A	yellow	0.518125687	-0.415403257	-0.119542389	-0.562763136	-0.806876954
NUCB2	yellow	-0.504768407	0.53647366	0.5589584	-0.064284841	0.611900467
KAT2B	yellow	-0.491621155	0.699453913	-0.023331692	0.530559764	0.909099612
SKI	yellow	-0.512416187	0.642638356	0.475694076	0.31979002	0.850169098
ATXN7	yellow	-0.526659168	0.699726084	0.343177215	0.335641103	0.924558677
PANX1	yellow	0.666113614	-0.275095167	-0.044141719	-0.448717136	-0.732466713
GPRASP1	yellow	-0.363243539	0.616461676	0.626944733	-0.020313531	0.696222407
MAD1L1	yellow	0.145347899	-0.348085222	-0.136430636	-0.22791371	-0.495837772
VAMP5	yellow	0.690397	-0.232445332	-0.286233833	-0.26309166	-0.636844207
RECQL	yellow	-0.290476391	0.761820197	0.168513935	0.258375612	0.799939938
CIITA	yellow	0.559225635	-0.360380035	-0.013571961	-0.353214197	-0.641384352
KMO	yellow	0.59842781	-0.128548217	-0.00269879	-0.35890862	-0.420909924
SNX15	yellow	0.043465893	-0.471425217	-0.384828856	-0.500622269	-0.778146983
NCAM2	yellow	0.437643869	-0.656557094	-0.172764349	-0.216305677	-0.792829638
ADRB2	yellow	0.485006136	-0.464122743	0.030662409	-0.22223009	-0.43428775
OPHN1	yellow	-0.012708927	-0.536123607	-0.197712806	-0.463410304	-0.771187834
CCR7	yellow	-0.53298553	0.453303851	0.418845263	-0.092359966	0.500901674
TCTN2	yellow	0.25052318	-0.554816715	-0.18166059	-0.56933383	-0.906357943
KLHL24	yellow	-0.606268635	0.633844737	0.360153422	0.334892313	0.944460256
HP	yellow	0.794987359	-0.606556904	-0.224866408	-0.152316322	-0.773124825
CCR2	yellow	0.661838865	-0.750177387	-0.200036261	-0.216710216	-0.904640785
IL12RB2	yellow	0.196182411	-0.474403945	-0.061486273	-0.194690332	-0.591633894
ALPK1	yellow	-0.680250087	0.486900871	0.345887661	0.466902438	0.882700336
USP34	yellow	-0.607700346	0.488347827	0.645123891	0.205921728	0.816058159
SORBS1	yellow	-0.786685423	0.562515539	0.17401843	0.293129042	0.863354001
NFKB2	yellow	-0.494412427	0.542341155	0.104331538	0.684662418	0.858338423
FCAR	yellow	-0.112686249	0.511457221	-0.006973494	0.617740396	0.789937346
TUBA1A	yellow	-0.247088212	0.597706832	-0.278171802	0.560464868	0.747677773
USP10	yellow	0.479915038	-0.524769795	-0.511014425	-0.269663299	-0.784019944
DDIT3	yellow	-0.140716633	0.509531066	-0.111246366	0.705214382	0.703249997
NSG1	yellow	0.497320375	-0.4362196	-0.47159472	0.095478327	-0.591238922
CYTIP	yellow	-0.527257814	0.409817121	0.116406215	0.641185701	0.77735725
SLC19A2	yellow	0.221276587	0.42104625	0.3873429	0.539487951	0.594242497
HLA-DRB4	yellow	0.366987481	2.95E-05	0.265760223	-0.393945508	-0.321323833
SLCO3A1	yellow	-0.076161826	0.609232004	-0.361489581	0.242449177	0.552530415
NCR3	yellow	-0.090672608	-0.511832548	0.03574511	-0.173430833	-0.499063904
ATXN7L3B	yellow	0.288885363	-0.430337981	-0.54677238	0.22027743	-0.459508153
DOCK9	yellow	-0.404879464	0.432469613	0.565791119	-0.179173909	0.486630686
UFL1	yellow	-0.253083781	0.465043365	0.27887654	0.231503488	0.652070584
TNNT1	yellow	0.333448008	-0.605879086	-0.191203303	-0.36984853	-0.82460183
G0S2	yellow	-0.48381057	0.555453235	-0.059856434	0.689801901	0.870630086
MDM1	yellow	0.187692707	0.340627995	0.658906052	0.262959802	0.564350728
CTSW	yellow	0.25889267	-0.431689913	-0.525233866	-0.2246627	-0.598413141
H2AC8	yellow	-0.456661108	0.416613418	0.467406646	0.231421108	0.754700526
ATP8B1	yellow	-0.655160091	0.652906166	0.289034256	0.253561328	0.930738976
CLK1	yellow	-0.512202526	0.909037091	0.269595274	0.051015182	0.856571555
THAP9-AS1	yellow	-0.245347722	0.622372612	0.034078072	0.532974944	0.843181024
TSC22D1	yellow	-0.202168805	0.710060828	-0.161168127	0.572503107	0.747454798
ZNF721	yellow	-0.592855303	0.517574078	0.531625038	0.33408692	0.90590264
YPEL5	yellow	-0.441388806	0.625016216	-0.02507757	0.572793688	0.814816094
LARS1	yellow	-0.382586704	0.766562545	0.32796346	0.436343929	0.925600104
BEX3	yellow	-0.44801813	0.688421837	0.104832844	0.445815709	0.850769571
BAZ1A	yellow	-0.493053565	0.612302144	0.035010349	0.587670326	0.93231902
TSR1	yellow	-0.761261588	0.454877311	0.521017459	0.074420876	0.772871843
PELI1	yellow	-0.38023926	0.666095858	-0.106039057	0.64892923	0.852065956
SNAP29	yellow	0.479988368	-0.095235525	-0.164476447	-0.4901007	-0.66396416
TVP23B	yellow	-0.113338938	0.331980467	0.244268273	0.664426777	0.807888902
RAP2C	yellow	-0.331609934	0.629409283	0.174451859	0.320429225	0.842245697
SIGIRR	yellow	0.052247995	-0.435045144	0.09277374	-0.655650094	-0.707890242
NTAQ1	yellow	0.603098728	-0.762006105	-0.155309503	-0.313701342	-0.912466103
DNAJB14	yellow	-0.441048049	0.718842539	0.43502399	0.247963196	0.862333972
DAPP1	yellow	-0.67916748	0.556675774	0.402004545	0.363038216	0.917391591
RPRM	yellow	0.329219096	-0.504862939	-0.143985994	-0.266066853	-0.737458721
PRR11	yellow	-0.633503367	0.558728954	0.504243185	0.286678643	0.920738687
CHST11	yellow	-0.54316994	0.638556733	-0.007722474	0.51544886	0.799617374
NOX4	yellow	0.57182503	-0.671244347	-0.16425137	-0.258506741	-0.873901188
CBLL1	yellow	-0.296685901	0.726192677	0.157691827	0.573391328	0.922778282
HAUS2	yellow	-0.65142867	0.607088022	0.340932118	0.356518598	0.94241819
SCD5	yellow	-0.000523481	-0.501881961	-0.192595472	-0.499126804	-0.77294134
TASL	yellow	-0.335945876	0.664396079	0.303701929	0.471734632	0.93057538
FLJ42627	yellow	-0.610392701	0.699017671	0.29458744	0.249117901	0.896519142
MZT2B	yellow	-0.711739789	0.561801629	0.442997771	0.231836659	0.876431743
SLC35E1	yellow	-0.783612668	0.472515078	0.375437907	0.344615159	0.878003603
ZNF587B	yellow	-0.475651037	0.830961496	0.289831239	0.231804813	0.900182956
GTF2H3	yellow	-0.588088394	0.487865823	0.487758647	0.278032072	0.881804693
C9orf64	yellow	-0.749491177	0.470548486	0.406640574	0.110208014	0.794263327
LOC114224	yellow	-0.322753955	0.511573335	0.003655341	0.49975249	0.780988878
DPH3	yellow	-0.251904993	0.634041254	0.121300726	0.673725259	0.907865211
LOC100129034	yellow	0.566079066	-0.455394196	-0.351596546	-0.263884492	-0.69639827
[truncated: 17 more rows]
