# Supplementary material for: Spatial Transcriptomic Analysis Using R-Based Computational Machine Learning Reveals the Genetic Profile of Yang or Yin Deficiency Syndrome in Chinese Medicine Theory
Source: Evid Based Complement Alternat Med. 2022 Mar 16;2022:5503181. doi: 10.1155/2022/5503181 (PMC8942619; doi:10.1155/2022/5503181)
Supplement: Supplementary Materials — Supplementary Data 1: normalized data set of GSE87474 by DESeq-2 in R. Supplementary Data 2: the value of module eigengenes of filtered genes in the Yang deficiency group. Supplementary Data 3: the value of module eigengenes of filtered genes in the Yin deficiency group. [file 5503181.f1.zip › 5503181.f1/supplementary data 3.txt]

GeneSymbol	moduleColors	MEblue	MEbrown	MEgreen	MEgrey	MEred	MEturquoise	MEyellow
HSPA6	turquoise	0.246578475	-0.472675509	-0.133087862	0.362484515	-0.598522058	0.699538092	-0.273623637
CCL5	blue	0.847938277	-0.234117554	0.13961024	0.081432249	-0.037613192	-0.401413894	-0.087992601
NEXN	yellow	-0.577256653	-0.46785246	0.026829478	0.132513922	-0.073913306	0.585045397	0.654075525
RBBP6	green	0.251776592	0.472453241	0.758363815	0.160207094	0.579534236	-0.414034911	-0.20337372
PDE7A	red	-0.264348919	0.401174085	-0.383399988	-0.002881163	0.554042695	-0.237696166	-0.133316912
C4orf33	turquoise	0.04710266	-0.121905526	0.119707342	0.237708171	-0.326590227	0.510632558	-0.344638444
GAPT	blue	-0.649741169	-0.004040046	0.176500241	-0.090605249	0.450407232	0.467382864	0.268959852
CLEC12A	turquoise	-0.274577385	-0.106940839	-0.199154963	-0.08032605	-0.319210522	0.480005855	0.180761978
CLEC4F	yellow	-0.078554822	0.070494878	-0.267931648	-0.62806684	0.045603157	-0.06699605	-0.324184709
ETV3	green	-0.104881541	-0.302486639	0.186128894	0.21457359	-0.20806264	0.277091381	-0.005567755
TM2D3	turquoise	0.330919877	-0.433209035	-0.366668466	0.063762732	-0.302534544	0.454758208	0.106397426
PTPRC	red	0.440338731	-0.564263023	-0.584482363	-0.045268005	-0.592210493	0.264551257	-0.318354753
LACTB	turquoise	-0.379217211	-0.704644336	-0.411209057	-0.145875429	-0.651033491	0.773684932	0.225500671
SLAMF6	yellow	0.582216665	0.305699597	0.436360032	0.036623882	0.184670271	-0.401212498	-0.436239081
GPBAR1	turquoise	-0.353432824	-0.303632328	-0.059531657	0.158897462	-0.586618995	0.781010339	-0.233414569
ACVR1C	brown	-0.016527209	0.615412603	0.229578231	0.225719756	-0.119878973	-0.102453824	-0.578492216
VTI1A	blue	0.008058667	-0.186652806	-0.080435053	-0.049709645	-0.356773711	0.26032876	-0.450967084
CLEC4C	grey	0.003833923	0.012577181	-0.170378488	-0.808897008	0.045378807	0.007418577	-0.017265852
NLRC4	turquoise	-0.278457043	-0.539007073	-0.261151777	0.000932035	-0.375494726	0.925979106	0.21311557
IL12RB1	blue	0.844908921	0.106085583	0.28635186	0.469049992	-0.023460032	-0.52947644	-0.430709964
CDC42SE2	brown	0.080661979	0.694765624	0.801031552	0.045559703	0.45443236	-0.500874107	-0.36385529
HSH2D	brown	0.188372657	-0.741927532	-0.218363679	0.08988382	-0.492538131	0.648383617	0.255716031
PHC3	green	0.33034725	0.48184859	0.755808425	0.231278006	0.44621554	-0.449567963	-0.075075729
UHMK1	green	-0.023357434	-0.067071278	0.465856925	0.421619821	-0.274041613	0.154208005	-0.025190175
DIP2A	yellow	0.404672779	0.083293101	0.089473307	0.326450388	0.184954715	-0.222605769	-0.221780742
USP28	blue	0.758060193	-0.169909581	0.270277728	0.425237029	-0.132010854	0.018808349	-0.213566658
ARL11	turquoise	-0.500937701	-0.327061913	-0.166614593	-0.047179514	-0.006174261	0.80163635	0.084838139
CARD16	turquoise	-0.464055678	-0.449293001	-0.177930049	0.157278776	-0.303445842	0.906833804	0.06061169
KLHDC1	brown	0.181068421	0.605267491	0.135326508	-0.326561934	0.351183778	-0.365843679	-0.471107569
CLEC4D	turquoise	-0.548248012	-0.317190289	-0.169402262	0.012005572	0.043121205	0.71952362	0.022275444
TLR4	turquoise	0.045681565	-0.644285748	0.105538727	0.182744948	-0.443421636	0.858064678	0.130806354
SIGLEC10	blue	-0.458283029	0.14928194	-0.232878822	0.178252192	-0.216195299	0.417798471	-0.197097852
FIGNL1	turquoise	0.347779677	0.443528833	0.201197	-0.175746673	0.568599134	-0.791116673	-0.171366459
SCAMP1	yellow	0.467720777	-0.139463269	0.349606191	0.163055365	-0.542890226	0.20408782	-0.260612806
CD300LF	turquoise	-0.497094312	-0.438155329	-0.106079505	-0.080800113	-0.481741857	0.926385124	0.004127112
SLFN5	green	0.408173327	0.435676654	0.703237609	0.279386884	0.024746134	-0.272391251	-0.409711723
TIGD1	brown	-0.022329417	0.665977429	0.828794	0.33293021	0.56538191	-0.332276802	-0.222234507
C5orf24	green	0.165413417	-0.782437434	-0.588335622	-0.019818899	-0.367006221	0.588673063	0.107472225
THEM4	brown	-0.296708136	0.862074566	0.374381882	-0.209207615	0.542228197	-0.491704811	-0.358911041
TC2N	turquoise	0.263752318	0.481405783	0.164334236	-0.024932733	0.583484121	-0.52719951	-0.147899875
C9orf72	turquoise	-0.173633643	0.034854479	0.436068613	0.341399549	0.087916617	0.364070625	-0.434022696
SH2D1B	blue	0.397312154	0.177374306	0.101150192	0.286991882	-0.279005046	0.047871427	-0.306174417
RASEF	turquoise	0.003490557	0.458743235	0.201474418	0.37889367	0.541832382	-0.566234128	-0.291234434
FCRL3	red	-0.229838833	0.589356001	0.278143798	0.536465088	0.441231037	-0.155780282	-0.293443755
FAM117B	green	0.275528485	0.653860687	0.598436509	0.167725572	0.530385721	-0.442191045	-0.547511748
ZNF718	brown	-0.027180265	-0.352690147	0.07901695	0.207927687	-0.25981937	0.23473646	0.253799916
CSF3R	turquoise	-0.126529763	-0.709671498	-0.341249923	-0.002429567	-0.50823928	0.879420214	0.131516125
SLC18A2	yellow	0.06883437	0.181070415	-0.40646851	-0.279405623	-0.297052468	-0.320289729	-0.374229034
SDE2	green	0.230603386	0.132125924	0.810922078	-0.103110301	0.067431506	-0.170750416	0.025167473
NIBAN3	red	-0.385793546	0.397421882	-0.085366225	0.323359393	0.846252346	-0.37163007	0.126256607
PARP15	blue	0.677158118	0.065089942	0.199680125	0.546607436	0.020195818	-0.374508169	-0.216249745
ITGB1	turquoise	0.375186503	-0.306773459	-0.084604434	-0.206646177	0.051832296	-0.206924988	0.421898629
ND6	blue	-0.24684177	-0.48944067	-0.582070784	0.21411875	-0.172920562	0.271723039	0.423178697
PDZK1IP1	yellow	0.075124631	-0.365402186	0.147668932	0.104775061	0.004285842	-0.063188171	0.711802028
EFCAB13	yellow	-0.11449744	-0.063358139	-0.099773192	0.413886028	0.146316825	-0.033140069	0.402664146
PRF1	blue	0.927662873	-0.085673757	-0.056344302	0.203405792	-0.385775466	-0.231802262	-0.322888677
BEND2	yellow	-0.203922645	-0.279394187	0.14790682	-0.123381738	0.333845653	0.063137921	0.887786579
P2RY10	red	-0.231187598	0.573790625	0.222777476	-0.158061434	0.874429274	-0.627051087	0.144223168
FGD2	turquoise	-0.633068051	-0.405293306	-0.289932538	0.188529344	-0.08901522	0.696190082	0.382361255
ZBTB24	green	-0.080700335	0.217774933	0.740744912	0.126418059	0.066847147	-0.111684942	-0.1191271
ASH1L-AS1	green	0.202879607	-0.16750655	-0.668304843	0.214943284	-0.223337234	-0.167431295	-0.226147969
CREBRF	green	0.124684141	0.391681554	0.818893558	0.103570961	0.13934615	-0.346545001	-0.139688693
HP1BP3	yellow	0.201099356	-0.018765347	-0.338547371	0.129039902	0.063621957	-0.45914992	0.2640842
HAVCR2	red	0.270580029	-0.432615506	-0.359713454	0.223092116	-0.674866417	0.524731131	0.027154599
ITPKB	turquoise	0.074555805	0.452781307	0.484506783	0.113679219	0.21169246	-0.522241024	-0.28920507
CYTH4	green	0.33413863	-0.634275913	-0.757876457	0.089923712	-0.45979283	0.300458321	-0.021497669
STAP1	red	-0.247415368	0.681747173	0.472936282	0.076986431	0.954501658	-0.509779383	-0.009830987
ACTR2	turquoise	-0.35931428	-0.037941875	-0.037225868	-0.190727921	-0.430771331	0.518026399	-0.395518376
CLEC7A	turquoise	-0.434185735	-0.471641272	-0.00429162	0.025897889	-0.350992788	0.931667562	0.071141245
JPX	blue	-0.309188835	0.003551655	-0.027643379	-0.379874615	0.278959945	0.115138867	0.024512673
LINS1	green	-0.043166135	0.194594539	-0.036525828	-0.251067401	0.426716111	-0.040499045	0.005048664
CRTAP	turquoise	-0.38187412	-0.559624377	-0.13590762	-0.153913157	-0.468535102	0.915009186	0.217773775
TSC22D4	green	0.058213057	-0.684831112	-0.699929672	-0.061229466	-0.472361221	0.557994186	-0.050177429
OSCAR	turquoise	-0.586661734	-0.512602843	-0.392115429	-0.161692658	-0.393649363	0.855508114	0.134678959
MBP	blue	0.201540962	-0.085361815	0.098967747	0.365766313	0.101592453	-0.085632863	0.04956692
LMNA	yellow	-0.131252075	-0.285621785	-0.018076284	-0.386618676	0.098864182	0.000670398	0.870687466
RBM8A	green	0.066832756	0.028439221	0.415923061	-0.045984565	-0.06951799	-0.035305689	-0.244438179
TGOLN2	turquoise	0.242396531	-0.129025224	-0.502303752	-0.062589833	-0.206323966	-0.282529734	-0.336862681
SIRPB1	turquoise	-0.496209457	-0.344277046	-0.285047533	0.016401501	-0.409303434	0.814288207	-0.142041807
NUMA1	blue	-0.393943382	0.523805446	-0.020925865	0.094486027	0.194318147	-0.141317983	-0.154434905
METTL8	red	-0.233450308	0.433517326	-0.103733727	0.26934758	0.734139754	-0.431134922	0.093456143
SRGN	turquoise	-0.322297143	-0.469778685	0.07605384	0.221331085	-0.219800709	0.739412135	0.037199994
HNRNPDL	green	0.280172853	0.46486076	0.867072762	0.190954936	0.397586583	-0.424726124	-0.324946797
ZNF655	yellow	0.229865281	0.095409053	0.401229179	0.017017301	-0.333794835	0.340849998	-0.621501775
MCTP1	turquoise	-0.203386121	-0.437916755	-0.54087037	0.110416853	-0.545888109	0.635488236	-0.108445085
RASSF5	green	0.208994806	0.318101668	0.571676436	0.595990382	0.004915379	-0.044598039	-0.104670222
S100Z	turquoise	-0.301575636	-0.281710846	-0.280794314	-0.074661334	-0.656343098	0.684011845	-0.144344235
ABCD3	turquoise	0.369087701	0.459309576	0.409769278	-0.090625756	0.442031627	-0.518455081	-0.201384431
MS4A3	brown	-0.343493197	0.557824411	0.256300638	0.093007085	-0.014675922	-0.089561567	-0.232546246
FCER1G	turquoise	-0.36928027	-0.447108553	-0.366867781	-0.014019416	-0.619844581	0.867990776	0.031946459
NLRP12	turquoise	-0.347621939	-0.639347168	-0.36602661	-0.179875846	-0.602348726	0.932812593	0.223313175
PTGS2	turquoise	0.018639639	-0.67379678	0.042896778	0.091295408	-0.296299146	0.735712756	0.006977313
IDH1	turquoise	-0.379488668	-0.562124206	-0.236764619	-0.165203368	-0.165387	0.831896726	0.092026791
NAGA	turquoise	-0.207590854	-0.349791111	0.098041022	-0.050745752	-0.566097448	0.689950381	0.138260344
LPGAT1	blue	0.748455704	-0.265380165	-0.117071286	0.453300966	0.026022629	-0.265977359	-0.00376173
CD96	brown	0.29710686	0.674369537	0.621025378	-0.106972011	0.516816353	-0.602301926	-0.313697489
NAMPT	turquoise	0.07611049	-0.640688869	-0.178598919	0.142981011	-0.320397593	0.71833596	0.18109686
RBIS	turquoise	-0.101391645	0.448776661	0.171122539	-0.230726713	0.210707178	-0.486226864	-0.138744253
RAPGEF6	brown	0.11622636	0.878221104	0.505416838	0.120288292	0.720191925	-0.710982404	-0.367285351
AQP10	yellow	-0.370547067	-0.087031492	-0.185155472	-0.505182562	0.233858923	0.07055658	0.68523088
ETS1	turquoise	0.263744528	0.623784602	0.031378114	0.018704924	0.669618707	-0.920403786	-0.110561129
CAMTA1	yellow	0.085013119	-0.318070556	-0.36771899	-0.146782811	-0.00592157	-0.140809208	0.568570791
CCNL1	green	0.015538381	0.348416007	0.928947416	0.267786257	0.242642153	-0.066007186	-0.256520034
ASAH1	turquoise	-0.434127351	-0.273592851	-0.019993096	0.328956903	-0.296565551	0.821646717	0.143347661
SYNCRIP	green	0.435558855	0.224617433	0.619461718	0.015598358	0.200633967	-0.219262963	-0.305964383
NAA16	brown	0.09129524	0.76888249	0.468881489	-0.14116206	0.331472356	-0.415344078	-0.529564828
IREB2	green	0.105283885	-0.195895062	-0.579159334	-0.248816458	-0.081242636	-0.1118417	0.007613
PRR5L	blue	0.948706102	-0.21230976	-0.025072138	0.075490479	-0.37633941	-0.237365681	-0.131896109
PTPRM	turquoise	0.355755155	0.103170775	0.226016028	-0.488241267	0.068935614	-0.370908029	-0.246328036
ZAP70	turquoise	0.685382676	0.485788794	0.111205463	0.037424552	-0.001255169	-0.729553865	-0.547986097
TREML1	yellow	-0.22568265	-0.325908252	0.041232816	-0.152147264	0.156710194	0.100665864	0.97622037
TAGLN	green	-0.145504562	-0.262199551	-0.646820931	-0.167512951	-0.221731259	0.221677946	-0.216156661
MS4A4A	turquoise	-0.485908631	-0.581137875	0.007796955	-0.149650144	-0.486151702	0.844241263	0.403574368
LYZ	turquoise	-0.221653774	-0.543809703	-0.195110561	-0.498158534	-0.550096082	0.615481189	-0.137873004
TIMM10	turquoise	0.458213214	0.436298114	0.30202913	0.001543989	0.377557702	-0.801642915	-0.188800819
CD79A	red	-0.241931549	0.633046144	0.247077356	0.205805241	0.96338497	-0.63777521	0.078337713
ZFP82	turquoise	-0.02017826	0.362481487	0.1242572	-0.526809408	0.445874424	-0.346550337	-0.093660221
KLF6	turquoise	-0.068212956	-0.696354151	0.041204128	0.086149235	-0.433067059	0.683276096	0.076002385
THUMPD3-AS1	green	0.006561775	-0.488494315	-0.879831141	0.045511782	-0.535806822	0.354920108	-0.160493808
RPS24	green	0.194597777	0.367060897	0.563227935	-0.113607655	0.226898872	-0.003746378	-0.435710536
PDSS2	red	0.08050569	-0.18543735	0.0055434	-0.332334251	-0.48791592	-0.070871904	0.18043688
CUTALP	yellow	0.142025038	0.003546178	-0.313931374	0.284974708	0.278054662	0.012905179	-0.41929774
CBX3	turquoise	0.234781517	0.629530225	0.224213916	0.292616047	0.20905519	-0.535631712	-0.46047432
VIM	turquoise	-0.493040457	-0.600741665	-0.523158965	0.027810599	-0.407742317	0.828427313	0.156739198
CD55	green	-0.507703017	0.438503253	0.431098786	-0.101765475	0.370776424	0.221131545	0.093126978
HINT1	green	0.277989299	-0.17254744	-0.070774483	0.090776397	-0.269775315	-0.170824527	-0.071555504
DAAM1	yellow	0.475802758	-0.308165386	-0.318869893	-0.015636868	0.035843209	-0.398239786	0.569244389
LINC01138	green	0.200004896	-0.486198075	-0.76209498	-0.252680304	-0.588196335	0.262253502	-0.239687499
MTMR11	turquoise	-0.450639715	-0.12518331	-0.090441566	0.025244523	-0.418597876	0.727476089	-0.196071358
ZNF207	green	-0.163838734	-0.517008125	-0.922326601	-0.116241778	-0.356335334	0.352057905	0.079695001
LINC01089	green	-0.47715659	-0.040716361	-0.684794502	-0.273579561	-0.038203771	0.096551937	0.103146554
RTN4	turquoise	-0.168212802	-0.076627274	-0.200427661	-0.342222445	-0.63259425	0.500951013	-0.474530444
LINC00528	turquoise	-0.137081748	-0.137663383	0.653783038	0.284623032	-0.12490127	0.548639179	-0.141103839
LOC105374809	green	0.168470492	0.259670064	0.608113597	0.127881553	0.532705101	-0.120222791	-0.293526177
SRGAP2	turquoise	-0.35318108	-0.18707718	0.148265926	-0.131018857	-0.4013751	0.652584913	-0.338027324
CLEC2B	turquoise	0.531188267	0.156630282	0.267057274	-0.071529058	0.174949475	-0.34110639	-0.013397402
TENT2	blue	0.617488459	0.008063191	-0.061200652	-0.05771331	-0.404779125	-0.027212958	-0.236950027
TLNRD1	green	-0.065279405	0.061742738	0.590861017	-0.058002797	0.054737676	0.100149587	0.032047174
COTL1	turquoise	-0.053215707	-0.423979498	-0.067395183	0.083871962	-0.622618782	0.717719112	-0.189305155
FAM185A	brown	0.218278581	-0.437218966	-0.335452785	0.091087177	-0.10872211	0.155550594	-0.183027308
ZNF80	turquoise	-0.020254758	0.018454196	-0.362632766	-0.25241554	0.094733656	-0.394455936	-0.045661639
ACSF3	green	0.290285325	0.183466546	0.645388731	-0.319744231	-0.021508756	-0.307000769	-0.11772893
FTCDNL1	turquoise	0.203636501	-0.525962327	-0.222655853	-0.167246792	-0.646651754	0.582393071	0.172908824
RBM6	turquoise	-0.306044947	0.023254104	0.000364405	-0.159580993	0.154825474	0.538025261	-0.153166819
LOC101928343	turquoise	-0.201518147	-0.277244951	-0.302026113	0.36835839	-0.55644834	0.551195402	-0.188379768
MEX3C	green	0.076647774	-0.172782217	0.362340851	0.055367295	-0.27252284	0.165757571	-0.235538612
CDC42-IT1	green	0.132518762	-0.010726416	0.418293965	0.527137442	-0.368251076	0.213879726	-0.24350837
SERPINB6	red	0.295991204	-0.336292865	-0.546418474	-0.006895263	-0.556783055	0.312817868	-0.001240637
LINC01128	brown	-0.306505629	0.854882072	0.363364294	-0.029746633	0.324484873	-0.326914256	-0.425857741
VPS53	yellow	0.239782573	-0.090895803	-0.200919586	-0.350622345	-0.252736547	0.269131826	-0.592154949
APOL6	blue	0.584572734	-0.25348598	0.248576006	0.341063994	-0.214928358	0.201876125	-0.242761072
PDCD4	green	0.267934885	0.204883482	0.568554301	0.104181093	0.314194271	-0.287941255	-0.060521051
HCG11	blue	0.596907445	-0.036841337	-0.109815983	0.245778331	-0.191694271	-0.208642018	-0.078987167
TPR	yellow	0.263426137	0.191814661	0.349690383	0.071814172	-0.032378908	-0.212918008	-0.453795164
BCL10	green	0.114295096	-0.020406514	0.659870275	0.002203044	0.091975982	-0.099775813	-0.033785817
MIR570HG	brown	0.168782988	-0.542711553	-0.158760728	-0.244964088	-0.200375181	0.139453155	-0.041001388
WHAMMP2	yellow	-0.084285849	-0.486589491	0.225171401	0.093439715	-0.271311293	0.288728585	0.636328588
TMEM272	brown	-0.227561465	0.837272218	0.053142392	-0.122572744	0.371083261	-0.294654729	-0.619766083
RNF165	blue	0.609697558	-0.284713283	-0.008587433	0.156287528	-0.536113282	0.125185029	0.052460111
RAF1	green	-0.111760307	-0.659827888	-0.809826923	-0.120812612	-0.466474795	0.525466304	0.050542374
CHRM3-AS2	red	-0.3099591	0.487098152	-0.011148832	0.006227063	0.598528573	-0.288119623	0.058960183
TMEM267	green	-0.248274806	-0.137938334	-0.850120248	-0.05739394	-0.151353211	0.089900707	-0.07890699
HSP90AB1	brown	0.069620285	0.699097739	0.441095346	0.085915732	0.159641515	-0.592990324	-0.34689716
CEP78	blue	0.82180841	0.031851503	0.421932314	0.171257256	-0.422595642	-0.258828617	-0.400652658
TTN	brown	-0.387187844	0.814175599	0.484789559	-0.148542349	0.640398757	-0.440992188	-0.143392918
STRAP	green	-0.125713372	-0.362602231	-0.31411471	-0.060421442	-0.472559937	0.275638397	-0.080224152
LOC441081	red	-0.138369013	-0.413689574	-0.455837999	-0.415210044	-0.578791183	0.565151725	-0.362668904
SRPK2	blue	0.572041603	-0.168707521	0.237021896	0.126907214	0.096989023	0.020980624	-0.037500448
TSEN54	blue	0.870062891	0.027964526	0.088255325	-0.146041082	-0.17142042	-0.550210104	-0.302472569
SIRT2	brown	0.385894072	-0.563119174	-0.323991073	0.177427632	-0.499318192	0.194172964	-0.152939065
SYNE2	blue	0.903486258	-0.097990921	0.019859178	0.238023363	0.012399434	-0.528364641	-0.18324784
PECAM1	yellow	-0.011726828	0.099437841	0.329815732	0.171428649	-0.219906362	0.345637946	-0.476046378
IGH	red	0.254693889	-0.272921898	0.277254848	-0.083670409	-0.446705077	-0.037701775	0.225599131
BANK1	red	-0.118432984	0.594290435	0.351114101	0.25488735	0.956222585	-0.608543756	0.160673619
ZBTB38	yellow	0.228058911	0.242832576	0.409362635	0.008441182	5.11E-05	-0.032533404	-0.649405314
BORCS5	green	0.031506527	-0.383335735	-0.529806818	-0.12795016	-0.196743269	0.124182925	0.047605211
SMCHD1	yellow	0.019510513	0.143726708	0.388635725	0.04973055	-0.134900575	0.133820321	-0.388092613
NFYC-AS1	yellow	-0.043242864	0.164542513	-0.207896564	-0.059745426	0.15855829	-0.173781481	-0.34613351
LOC101928307	green	0.060452798	-0.133934142	-0.459300498	-0.666400883	-0.238042966	0.125277385	0.13788353
ZNF664	green	0.172377083	-0.055239567	-0.595460512	-0.07717163	0.00677244	-0.104953592	-0.233124027
LINC00565	brown	0.004988618	0.818562	0.570526185	-0.102023441	0.416493452	-0.516924556	-0.225183736
HTATSF1P2	yellow	0.313340912	-0.457953415	-0.105993327	0.116072673	0.137658669	-0.005176719	0.622733481
PEX14	blue	0.458049545	0.118647554	-0.169360482	-0.053170346	0.140980096	-0.505228519	0.134854311
THEMIS	turquoise	0.264590107	0.229563278	0.440339144	-0.009146324	0.442670617	-0.403965821	0.004302338
FOXP1	brown	-0.367821038	0.877425216	0.257739723	-0.180706472	0.636939268	-0.425091079	-0.382684599
CCDC163	blue	0.334076941	-0.243296879	-0.139315765	0.564329127	-0.201183911	0.118688292	-0.19645874
PTPRE	turquoise	0.018759166	-0.355456512	0.068611206	0.303306697	0.250613708	0.403101756	-0.033244803
SEPTIN9	yellow	-0.077374821	0.263564959	-0.190079989	-0.297792012	-0.018673986	0.018552169	-0.58179916
CYP4F35P	turquoise	0.365209263	0.132213424	-0.266917317	-0.269290494	-0.130415549	-0.627567049	-0.126590642
SIRPB2	turquoise	0.025335359	-0.696348089	-0.414368767	-0.485165215	-0.690224264	0.672353631	0.016789282
EXOSC1	green	-0.033178143	-0.267386482	-0.874466445	-0.127888618	0.014791971	0.127600161	0.041694735
HCG27	turquoise	-0.520199664	-0.451155205	-0.17895611	0.255799265	-0.248304805	0.726445805	-0.03410785
LINC01550	brown	-0.196097868	0.872809002	-0.060533729	-0.011935046	0.571694121	-0.664070914	-0.388264132
RRP12	turquoise	-0.349650466	-0.489760803	-0.236466776	0.117511432	-0.346901889	0.779642048	-0.162577597
KRAS	green	0.10850354	-0.162783237	0.360645489	0.015267307	-0.364259692	0.042599144	-0.225109489
LINC02273	turquoise	-0.031442982	0.237398532	-0.464692539	-0.082182223	0.276149105	-0.473941223	-0.048147178
ATXN1	brown	0.237939723	-0.593367313	-0.128127602	-0.37661739	-0.239700415	0.107765909	0.358519501
LINC01730	yellow	0.209531041	0.354239803	-0.109987073	-0.334884863	0.185167802	-0.310087853	-0.619789665
ZC3H12D	red	-0.302415092	0.115054017	-0.164105563	0.014403077	0.678099412	-0.356923613	0.292666837
SNX29P2	turquoise	-0.204033533	-0.619855557	-0.361519062	-0.124743841	-0.324339375	0.668175926	-0.02470126
ZCCHC10	turquoise	0.518045608	0.089121519	0.033650991	0.211084192	0.248290264	-0.317108431	-0.308095613
LRRC25	turquoise	-0.330611378	-0.478443121	-0.113328334	0.235073672	-0.515182876	0.884103309	0.094047141
LINC01410	yellow	-0.531143138	-0.380710625	-0.446282913	0.232945618	-0.06888376	0.493667685	0.543790233
SAMHD1	turquoise	-0.441994256	-0.127265198	-0.623573264	-0.405382265	-0.105185573	0.498099197	-0.117822394
LOC401261	brown	0.177730284	-0.638880719	-0.415531662	0.265098681	-0.238757728	0.182795206	0.18480598
BTG1	green	-0.09077316	0.554385358	0.789437975	0.049664892	0.403625448	-0.36924485	-0.287239175
SYF2	green	-0.019626351	-0.324299182	-0.742999347	0.013029994	-0.439485284	0.036802036	-0.117506202
SFXN3	green	0.068083387	-0.273255129	-0.213528157	0.082624162	-0.481977033	0.028569204	-0.171608111
LOC399900	brown	-0.026694341	-0.653504186	-0.166376123	0.286772915	-0.233225004	0.549137085	0.272411845
WDFY2	turquoise	-0.161876548	-0.517905792	-0.649358874	-0.143602243	-0.507947317	0.721132553	-0.173474115
MKLN1	green	-0.026477252	-0.372934582	-0.863777212	0.002739077	-0.251778123	0.211523549	-0.008329325
STXBP3	green	-0.08014752	-0.766114516	-0.714411779	-0.102946576	-0.423239409	0.63979961	0.221485748
LINC00944	blue	0.56081138	-0.146761985	-0.129442197	-0.072524357	-0.050376913	-0.339192788	-0.14285624
LINC01127	turquoise	0.10428848	-0.645697443	-0.043953222	-0.000765733	-0.500524595	0.608953999	0.305243342
CMTM7	green	-0.516949038	-0.170739198	-0.758121947	-0.267454953	-0.05745902	0.297671668	0.100021958
LINC00996	green	-0.214281353	0.026044959	-0.4715403	-0.571736502	0.267285537	0.083153894	0.065005774
SF3B6	green	0.407667325	-0.377184385	-0.610982262	-0.146271897	-0.453581115	-0.194066617	-0.053605411
SMARCC2	green	0.402136263	-0.481115468	-0.551745313	-0.144275582	-0.170813322	-0.131650655	0.094258008
RIN3	turquoise	-0.033080867	-0.558492997	-0.446540922	0.140142636	-0.682814387	0.747278138	-0.322582798
CCND3	green	-0.486852108	0.221704353	-0.547403331	-0.203646878	0.210970848	0.09681819	-0.284695308
ZNF578	yellow	0.351320589	-0.296369841	-0.236247233	0.022381961	-0.175299318	-0.219898616	0.535276535
OR7D2	turquoise	0.095676237	-0.270742871	0.236826334	-0.461167399	0.010578354	0.271090827	0.250556055
SLC8A3	yellow	-0.212046016	-0.473043103	-0.297023742	-0.176390452	0.118463739	-0.010022646	0.814036096
LINC02481	blue	0.568800144	-0.415923438	-0.067767422	-0.116762259	-0.030591713	-0.315259177	0.26195655
DDX6	turquoise	0.324057788	0.45179769	0.401192113	-0.145287118	0.465743722	-0.552770304	-0.060729722
AATBC	turquoise	-0.491958959	-0.366976208	-0.094615951	0.010772589	-0.430580119	0.922716819	0.045754679
SLC38A10	turquoise	0.035041969	-0.621666445	-0.534739269	-0.322749947	-0.401906434	0.494835315	-0.00427758
SNX20	red	-0.24006615	0.057873	-0.346294482	-0.0965981	0.142671636	0.139218198	-0.016947226
FCRL2	red	-0.354626557	0.481780369	0.151444356	0.201545066	0.91938599	-0.517491437	0.16140127
GPR141	red	0.304052682	-0.228901513	-0.448304264	0.097280113	-0.636901439	0.421524807	-0.386120338
RNF130	turquoise	-0.203949169	-0.496961508	-0.026235173	-0.002191325	-0.579852757	0.87420387	-0.186419401
CAST	yellow	0.47316086	-0.286253791	-0.241464693	-0.152554926	-0.191019296	-0.323127838	0.387179081
A2M-AS1	red	0.530705869	-0.332585655	-0.209774984	-0.388767897	-0.452990276	-0.13314453	-0.326094585
LINC01619	turquoise	-0.021643239	0.545722999	-0.362476773	-0.025231071	0.54339655	-0.576430455	-0.211542576
DTHD1	blue	0.494314599	-0.082206181	-0.139791243	0.721021335	-0.329807494	-0.181512994	-0.306029806
MPP7	turquoise	-0.51890505	-0.298969689	0.026470305	-0.344820623	-0.46996985	0.779575425	0.119348659
KRT72	yellow	-0.195946204	0.483368895	-0.039089717	-0.186244125	-0.164997697	-0.1444908	-0.732745075
MGST1	turquoise	-0.360106689	-0.623009348	-0.236768833	-0.052700934	-0.477062701	0.827216088	0.117103903
AGAP4	brown	-0.16801541	-0.557507248	-0.840461262	-0.298948546	-0.424168982	0.462390221	0.197622372
FUS	brown	-0.192650902	0.765027484	0.676496988	-0.019873391	0.506425123	-0.504329258	-0.30466212
SOD2	turquoise	-0.129277392	-0.718323484	-0.39131402	0.109104751	-0.359017002	0.829590588	0.343826132
NUDT16L2P	turquoise	0.083923002	-0.384833764	-0.432628298	0.235360711	-0.087099632	0.368701185	0.123076938
ITPRIPL2	turquoise	-0.167750791	-0.672592354	-0.361640294	-0.092619805	-0.681970822	0.872463948	-0.057979917
PPP4R3B	green	0.117714203	-0.286221027	-0.086304095	0.29298952	0.173103456	-0.093947723	0.064608937
RNF103	green	0.082422702	0.376321481	0.896606117	0.051877075	0.320013408	-0.311587956	-0.058089155
ZNF506	turquoise	-0.062678788	0.037570124	0.026762242	-0.057128808	-0.333420617	0.162503244	-0.279579836
RP2	green	-0.014334729	0.48615271	0.714759853	0.13213473	0.55044257	-0.091055719	-0.240045925
IRAK3	turquoise	-0.502052335	-0.348379069	-0.28204959	0.104887673	-0.21248638	0.654894737	0.137587255
SLC24A4	turquoise	-0.276424682	-0.375656394	-0.38502283	-0.220253855	-0.458848977	0.655327284	0.041183424
CX3CR1	brown	0.367776757	-0.63015917	-0.680119677	-0.132277324	-0.338557821	0.331100159	0.213049678
HNRNPC	green	0.384047873	0.031887896	0.813137775	0.231937537	0.097471283	-0.046906286	-0.242094211
INPP5D	green	0.097304711	-0.315182177	-0.645794776	-0.051450029	-0.193037182	0.155265672	-0.180482935
C16orf72	turquoise	0.315720781	-0.128994882	0.060074366	0.194070349	0.040051569	0.313324769	-0.251225443
GABPB1-AS1	yellow	-0.024294111	0.140495846	-0.05956603	0.019725703	-0.273637587	-0.022484193	-0.372501929
LOC728613	green	0.122504525	-0.446569042	-0.630820166	0.016633812	-0.694659754	0.139840027	0.10932053
MGAT4A	brown	0.168262915	0.710773731	0.690857163	-0.130402889	0.440633637	-0.708902108	-0.363633826
TRIM13	green	-0.191650657	-0.628901596	-0.719883773	0.007736884	-0.460081233	0.548274433	0.128443741
TTC9C	green	0.213453964	-0.418822015	-0.861640602	-0.137720172	-0.30487066	0.238898778	-0.190047881
FMNL1	turquoise	0.054707811	-0.516594925	-0.515292011	0.047698258	-0.434773836	0.608083483	-0.073986862
FNIP2	turquoise	-0.143406932	-0.399214194	-0.046931996	0.119875897	-0.565060352	0.727980311	-0.118288429
ZFYVE28	blue	0.856986406	-0.263034071	-0.300269448	0.049305039	-0.470416141	-0.055458826	-0.255201867
TET2	red	0.086659451	-0.494547269	-0.36984645	0.172835603	-0.737141105	0.645176506	-0.218755558
ZNF782	green	0.419412213	0.172182349	0.478549189	0.107987001	-0.237487523	-0.104067095	-0.248202184
LOC105379426	turquoise	0.332892032	0.119262496	-0.332566746	-0.141569528	-0.062345325	-0.57229592	0.080811336
MLLT3	brown	-0.01071435	0.897039236	0.373679908	-0.124653158	0.446173176	-0.617153725	-0.539071417
ATP8A1	turquoise	0.463162386	0.060707124	0.408956625	0.153286825	-0.060671829	-0.418780616	0.058966765
SLC6A16	green	0.239850637	-0.326414805	-0.600103624	0.559874223	-0.153323985	0.203443219	-0.15104561
APP	turquoise	-0.380209862	-0.448416241	-0.123636953	-0.139457058	-0.137580018	0.679791309	0.5300227
DSP	red	-0.337151689	0.317019498	-0.072347503	0.178943687	0.759676454	-0.186884739	0.344794189
CSRP1	yellow	0.165644734	0.039780543	-0.12106498	-0.047005464	0.105413371	0.074404721	-0.518529871
WARS1	turquoise	-0.279273196	-0.212263368	0.061344392	0.319359563	-0.414849529	0.788910054	-0.161436288
GLUL	turquoise	-0.112310926	-0.66785492	0.021796735	0.171410815	-0.341466028	0.873535868	0.271265509
S100A11	turquoise	-0.301525883	-0.702017716	-0.21531702	0.063462558	-0.573235075	0.95147483	0.228266367
CTSA	yellow	-0.677066672	-0.318231742	0.075592821	0.024911018	0.081311903	0.551797544	0.720385543
DNAJB1	green	0.169798402	0.640385768	0.847635304	0.107012775	0.537429322	-0.623060014	-0.137602575
SPARC	yellow	-0.265529735	-0.363370809	0.058660936	-0.091446499	0.104158768	0.163678451	0.946081808
XBP1	blue	0.70149517	-0.267488062	0.048481246	0.227544636	-0.126946598	-0.22601451	0.341681316
CD81	blue	0.744890252	0.337053958	0.466488856	0.024547697	0.176291874	-0.614488693	-0.399800324
GRN	turquoise	-0.550628093	-0.526890293	-0.082294957	-0.049948147	-0.413197917	0.94210964	0.181721763
KDELR2	turquoise	0.412122319	-0.451798094	0.368140053	0.072232502	-0.337753434	0.468933451	0.063268557
NPC2	turquoise	-0.378873122	-0.431955448	-0.18292685	0.026626302	-0.52390528	0.940641576	-0.065011549
PTP4A1	green	0.113672993	-0.283861794	0.548225733	0.321261091	-0.19727163	0.370400783	-0.108602726
GPX1	yellow	-0.545168673	-0.564906765	-0.321288733	-0.285772789	-0.15404329	0.592139943	0.759357495
TPP1	turquoise	-0.389943152	-0.596345871	-0.067134955	-0.034437834	-0.549843056	0.901777056	0.233848066
FTH1	turquoise	-0.186462083	-0.74387459	-0.05943741	0.095883704	-0.279792229	0.78390214	0.488278711
DPYSL2	turquoise	-0.229992404	-0.68746472	-0.153144032	-0.151665363	-0.661935792	0.955400039	0.098309724
ANXA5	turquoise	-0.372547974	-0.615860969	-0.294755101	-0.249264976	-0.565049697	0.871515004	0.019384978
PEA15	turquoise	-0.273564813	-0.546667763	-0.148428194	-0.088204789	-0.358208427	0.87264589	0.056935163
ODC1	yellow	-0.147826581	-0.066690663	0.165295497	-0.006628085	0.409586943	-0.230165339	0.891198456
LAMP2	turquoise	-0.019304017	-0.713135698	0.041916772	0.151086643	-0.400451285	0.840407742	0.027992458
PLOD1	brown	0.607765854	-0.561839839	-0.15319371	0.16107005	-0.569042351	0.376377052	-0.335273043
CTSB	turquoise	-0.35534554	-0.665285984	-0.261015549	-0.13660447	-0.503463512	0.97419011	0.200036155
PSAP	turquoise	-0.567088678	-0.390411609	-0.110561645	0.076082525	-0.382178756	0.91380359	0.136737889
S100A10	brown	-0.060464524	-0.8652029	-0.397419007	-0.387672468	-0.534914477	0.687891751	0.39116622
CCT8	green	0.048079462	0.374588927	0.525272407	-0.305008707	0.407078237	-0.059906278	-0.250579286
STAT1	turquoise	-0.195988402	-0.24545902	0.391598323	0.348007422	-0.125126091	0.670011118	-0.061997206
TAGLN2	yellow	0.046522671	-0.521478753	-0.154986317	-0.168036639	-0.056006544	0.185588779	0.833655881
LGALS3BP	turquoise	-0.292760525	0.180841938	0.464061057	-0.119598866	-0.001183233	0.286016108	0.034124113
CCND2	yellow	0.250497862	0.55286856	0.435569347	-0.073143206	0.017943307	-0.485888585	-0.490265277
SDCBP	turquoise	-0.267008405	-0.638275235	-0.225868782	-0.009988959	-0.404949787	0.957247537	0.150643869
RPL31	blue	-0.404159747	0.291243855	-0.297523655	-0.06373377	0.075367017	0.2245385	-0.215983681
ABLIM1	brown	-0.206210584	0.982130064	0.3910769	-0.041767123	0.647479991	-0.61484305	-0.301778743
ACTA2	brown	-0.118799956	-0.407713899	0.111900701	-0.174875751	-0.297937133	0.116307004	0.090625935
SERPING1	turquoise	-0.129304075	-0.54353122	0.261947111	0.060338666	-0.453584927	0.776224452	0.061097853
CKAP4	turquoise	-0.500940817	-0.553088156	-0.091320776	-0.041573576	-0.349069696	0.931305518	0.198820886
SSR4	green	0.157707458	0.671374704	0.690884136	-0.032418916	0.68113964	-0.638784939	-0.097345694
CD9	yellow	-0.063951984	-0.359008246	0.064040782	0.000361911	0.09605735	0.047907218	0.808262377
TXNIP	yellow	-0.135064874	0.388429243	0.156427233	-0.307968538	-0.104447737	0.11487548	-0.661123886
ANXA1	brown	0.08917857	-0.807955081	0.009171923	-0.187466005	-0.471087849	0.597959477	0.299258121
JUP	turquoise	-0.490706115	-0.218920766	0.27864088	-0.03181023	0.058687972	0.620194167	0.176400507
EIF1AX	green	-0.184186922	0.127871438	0.463699828	-0.165900382	0.286471823	0.025768359	-0.072265266
DSTN	blue	0.659127722	-0.327205768	0.315259855	0.200884257	-0.053926745	-0.257691725	0.133781827
CD99	blue	0.693021156	-0.448266814	-0.112078351	-0.039073115	-0.397282878	-0.230684971	0.201139747
LDHB	brown	-0.061433708	0.966657973	0.32943233	-0.039137727	0.646027779	-0.758490848	-0.339022255
PFKP	red	-0.177301484	0.315670225	-0.152863744	-0.004803237	0.520680495	-0.329441231	0.009260032
DUSP1	green	-0.090908891	-0.3844607	0.423393683	0.260822183	-0.25979413	0.610961025	-0.044406123
MYL9	yellow	-0.128048637	-0.279253677	-0.194160921	-0.186893984	0.187447492	-0.080891213	0.869390096
RCN1	turquoise	0.036490933	-0.324940649	0.321764454	0.235432943	-0.279316601	0.418727572	-0.106024358
BCLAF1	yellow	0.123258421	0.400512495	0.574903826	0.320719318	-0.201018509	-0.040639024	-0.460741919
SON	turquoise	0.221805671	0.064354459	0.211713104	0.407615851	0.093607888	-0.263659835	0.22810329
ATP6V1B2	turquoise	-0.069451846	-0.596774234	-0.359450371	0.123952661	-0.442346982	0.871401931	-0.020855743
LGALS1	brown	0.048363284	-0.762438395	0.007346573	-0.119950663	-0.756884501	0.711671558	0.173713942
TUFM	turquoise	0.448855469	0.487540011	0.144862901	-0.204428159	0.358589688	-0.477084822	-0.258066933
PGRMC1	yellow	-0.47064659	-0.202098134	0.022905962	-0.013409282	0.203102436	0.202982384	0.913681619
HLA-DPB1	turquoise	-0.408360298	-0.381533643	-0.405077888	0.269248553	-0.383315238	0.669707295	0.048997658
IGFBP7	red	0.544044003	-0.399791998	-0.240103716	0.281403434	-0.725111716	0.359081058	-0.224348503
CREG1	turquoise	-0.495762216	-0.533144531	-0.046551818	-0.188224307	-0.459224128	0.944088961	0.186252875
CTBP2	red	0.37553573	-0.636213716	-0.319559568	0.233986291	-0.809716623	0.597907968	-0.256325156
RAD23B	turquoise	0.110542588	-0.201603126	0.026280259	-0.041968027	0.047756866	0.360189369	0.243245621
BTG2	green	0.137753748	-0.034020143	0.621642416	0.297612742	0.149764556	-0.041385156	-0.108861273
ATP1B1	brown	0.348032588	-0.643575164	0.186466294	-0.118194006	-0.582122232	0.479158183	0.119518165
WSB1	yellow	0.022917392	-0.103742945	0.25557132	-0.125589596	-0.312691657	0.455924475	-0.176436972
IFITM2	brown	0.094880914	-0.793691519	-0.317584064	0.109837241	-0.744243421	0.726657125	0.072443494
CCT6A	turquoise	0.428770706	0.341268147	-0.054836201	-0.131763051	0.01299486	-0.366658027	-0.177105274
ETS2	turquoise	-0.252276766	-0.40610814	-0.710705478	-0.244963322	-0.438016742	0.616588628	0.001057025
SLC9A3R1	blue	0.803899352	-0.025175113	0.005527323	-0.181420177	0.035226266	-0.595111948	-0.204889928
CST3	turquoise	-0.105076725	-0.674485375	-0.317723415	-0.140889216	-0.743578986	0.809437648	0.232942426
OAZ2	turquoise	0.008033559	-0.631903652	-0.345929598	0.024250565	-0.643904955	0.838233745	-0.27780669
IGF2R	blue	0.822130175	-0.381585545	-0.145642328	0.227309192	-0.558937032	0.051535745	-0.285931652
MGST3	turquoise	-0.422185732	-0.049095612	0.087062288	0.134156841	-0.257037522	0.553772246	-0.413585722
PPP1CB	brown	0.309745684	-0.689847816	0.173542737	0.354506318	-0.226319358	0.439608181	0.29885546
ALDH2	turquoise	-0.351033234	-0.437906403	-0.210611329	-0.007036683	-0.486509849	0.920342706	0.00731747
CAT	turquoise	0.097629817	-0.386149512	-0.276826823	-0.22606763	-0.618913203	0.620603434	-0.250257053
COL6A3	turquoise	0.055434679	0.557359479	0.231234455	-0.272253565	0.549154013	-0.738959956	0.241275301
TALDO1	turquoise	-0.434777373	-0.64301414	-0.247896229	0.077059681	-0.461412305	0.938401889	0.287524087
JUN	green	-0.181038853	0.066046296	0.601022499	0.035168384	-0.014679201	0.111499931	-0.075703792
JUNB	green	-0.200934756	0.205548048	0.886435093	0.221824015	0.251683986	0.07801215	-0.050780643
NFKBIA	green	-0.125901555	0.084703449	0.732258635	0.109628306	0.11079664	0.175926029	-0.042869837
TGFBI	turquoise	-0.321493165	-0.556211281	-0.076346585	0.078144866	-0.512134478	0.957628484	0.070860069
ZFP36	green	0.062750364	-0.103713907	0.606368825	0.26522756	-0.074807398	0.303358376	-0.272466639
DUSP3	turquoise	-0.324087032	-0.475281604	0.061914542	0.104227516	-0.526231561	0.868667151	-0.0404302
SAMM50	yellow	0.365752059	0.536306191	0.078414402	0.164511731	0.141094885	-0.415290472	-0.662394694
TMX4	blue	0.658576267	-0.537925547	0.154784868	-0.005773416	-0.425093753	0.123065158	0.253078693
SEC23B	turquoise	0.010342014	-0.36474668	-0.30540509	-0.104235242	-0.568067512	0.744477006	-0.278661609
PRDX3	turquoise	-0.195652309	-0.450389605	-0.305597815	-0.110103195	-0.403383783	0.800974083	0.029812207
IER3	green	-0.044156565	0.485349921	0.749632151	0.048668155	0.500776082	-0.151313213	0.044130943
BST2	turquoise	-0.206252292	-0.514494793	-0.131102292	0.001643286	-0.197024697	0.756966616	0.111344752
IFNGR2	turquoise	-0.474685785	-0.298056667	-0.04701174	0.057916536	-0.384332926	0.892611411	-0.090146596
SCARB2	turquoise	-0.352659186	-0.457833376	0.082185133	-0.064421303	-0.384734782	0.920431856	-0.041397356
UBE2L6	turquoise	-0.216133432	-0.36335057	0.370114937	0.137078276	-0.117133897	0.664618114	0.082503456
ITGA6	brown	-0.019319897	0.905257161	0.354670019	-0.004618924	0.55746626	-0.698545246	-0.228650059
TIMP1	yellow	-0.470078412	-0.561161955	-0.153110425	-0.340448603	-0.256869753	0.571495964	0.692210695
MARCKS	turquoise	-0.306012714	-0.540865657	0.048803993	-0.085470298	-0.381570439	0.880161546	0.211652687
DLG5	yellow	0.406782142	0.254572066	-0.131484575	0.270990984	-0.380635124	-0.183443264	-0.841781044
EGR1	green	-0.161273553	0.18779574	0.826786927	0.21013578	0.347619514	0.152262579	-0.195115523
SGK1	turquoise	-0.15679102	-0.319334114	0.350023805	0.199445725	-0.064757639	0.674894647	-0.005858118
CD14	turquoise	-0.448757007	-0.598269586	-0.217612873	-0.229489879	-0.357806388	0.922451171	0.366888878
MTHFD2	turquoise	-0.407502303	-0.338671486	0.049335743	0.330735914	-0.161094417	0.835230407	-0.011399336
AZIN1	turquoise	-0.058264729	-0.236286791	0.236287922	0.12839052	0.062467092	0.529125873	0.177638938
NCAPD2	brown	0.082053809	-0.348113358	-0.149937928	-0.2536169	-0.217718657	0.081117476	0.260718477
MYOF	turquoise	-0.373841563	-0.267420159	-0.097585818	0.288538905	-0.379164319	0.790090348	-0.158525256
NET1	brown	0.091568725	0.529738612	0.12230565	-0.267220769	-0.184517358	-0.198151284	-0.608578583
LIPA	turquoise	0.114129278	-0.232553589	0.166290947	0.002017852	-0.625825073	0.506424289	-0.209410579
CAPG	turquoise	-0.786421245	-0.179837705	-0.243414102	-0.195126904	0.046601903	0.689147832	0.05245198
CDC25B	turquoise	0.132621424	0.645480743	0.053164424	-0.165385656	0.635270328	-0.901882628	-0.206627726
IL13RA1	turquoise	-0.115511044	-0.773587384	-0.442213628	-0.228500849	-0.531456788	0.839708314	0.218086693
IMPDH2	brown	0.008523501	0.895961467	0.331301337	-0.057054007	0.554639167	-0.62763102	-0.324948783
PSRC1	turquoise	-0.122567487	-0.509771029	0.108851425	-0.391178057	-0.319571215	0.708103541	0.240460492
CTDSPL	yellow	-0.219358693	-0.185351882	0.217606431	-0.104518847	0.281591549	0.09820717	0.901888316
RPS4Y1	blue	0.358887187	-0.014900163	-0.341406541	0.293998688	-0.247499925	-0.135772664	-0.155964281
SLC20A1	brown	0.579766867	-0.624873614	-0.489697377	0.183580695	-0.396713809	0.325659969	0.026667216
NSA2	brown	-0.135807314	0.731093851	0.529893062	0.057308891	0.241128035	-0.395761589	-0.554586892
MCM6	yellow	0.025832918	0.284023314	0.245159162	0.024259793	0.047266575	0.205284724	-0.354776159
CDK2AP1	turquoise	-0.247895757	-0.715920953	-0.493472093	-0.188670436	-0.480568056	0.626651542	0.566144349
PLK2	green	-0.086416753	0.619048596	0.780833273	0.01329746	0.678277332	-0.301129966	-0.145695329
CPD	turquoise	0.494446873	-0.538691085	0.185124297	0.229833598	-0.304989209	0.451231806	0.148228662
HEXB	turquoise	-0.321023414	-0.676156954	-0.391416846	-0.07314295	-0.521798602	0.922921706	0.204652915
ACSL1	turquoise	-0.082313131	-0.63106421	-0.044793045	0.124368697	-0.497725588	0.894810415	-0.036474213
ATP6V1A	turquoise	-0.042258951	-0.45693367	-0.003733146	0.327126911	-0.05589813	0.673484596	0.107070338
DYNLT1	turquoise	-0.228355784	-0.740349368	-0.46428096	-0.025600464	-0.579320225	0.934551177	0.187785294
PTPN12	brown	0.488158455	-0.576204788	0.280612775	0.419507172	-0.364589792	0.368524591	0.166836491
PPP1R15A	green	-0.009936238	0.284892481	0.905974822	0.06544491	0.078435157	0.010903272	-0.213704422
MEST	brown	-0.493913078	0.566768637	0.432347839	-0.380307395	0.254497875	-0.14363237	0.194444344
LTF	brown	-0.451736933	0.288520068	0.495596096	0.017798799	0.361654049	-0.009574661	0.438981982
EIF1	green	0.007279028	0.504297988	0.894278981	0.230444987	0.407206313	-0.327031573	-0.264436563
OPTN	yellow	0.222034398	-0.274182994	0.156072529	0.306035717	0.087366433	-0.159310848	0.441857033
IER2	green	-0.124676446	0.114125596	0.801480169	0.318190299	0.378783999	0.186621356	-0.08409699
SEC14L1	turquoise	0.094988041	-0.721356674	-0.243681009	0.10674188	-0.626855978	0.743343774	0.327174775
MX1	turquoise	-0.301597718	-0.484845908	0.197014761	-0.183273043	-0.172955447	0.731552809	0.223208894
CTSL	turquoise	-0.151072934	0.224007332	0.146064035	0.420902909	-0.267138953	0.331215049	-0.277783443
PRMT2	yellow	0.27175324	0.276026463	0.030820373	0.063709386	0.162464692	-0.461087662	-0.266069501
RALB	turquoise	-0.395678885	-0.585472526	-0.165001394	-0.077198563	-0.463731756	0.975475306	0.232762457
TRAK2	brown	-0.132040797	0.667916825	0.801100511	0.1880533	0.732385637	-0.443055173	-0.11408299
LY6E	turquoise	-0.119474253	-0.545136434	0.252395102	-0.056646944	-0.272758718	0.567335141	0.268330078
IFRD1	yellow	0.069759392	-0.335488613	0.258712571	0.155098462	0.152195119	0.156591284	0.4849477
NUP214	turquoise	-0.234855687	-0.68101601	-0.306616896	-0.125211676	-0.587881449	0.936387059	0.271115244
PPP1R2	brown	-0.12573605	0.749437647	0.484448247	0.020705569	0.567481375	-0.56889783	-0.387733933
AASDHPPT	green	0.392770807	0.153595584	-0.336447823	-0.006583781	0.159578449	-0.175949928	-0.039283062
GAS7	turquoise	0.100868414	-0.819986966	-0.185103303	0.067064951	-0.549533484	0.803378192	0.040411793
BLVRB	turquoise	-0.411555101	-0.624739067	-0.134738714	-0.125294431	-0.592579868	0.910792981	0.184605235
AMFR	turquoise	0.034566948	0.018753683	0.0689852	-0.357764853	0.179419737	-0.173792912	-0.161780511
ARL4C	turquoise	0.731163745	0.181623399	0.168073343	0.120512051	-0.073205766	-0.650788562	-0.062569649
KHDC4	green	-0.078908227	-0.37965437	-0.943581257	-0.087408248	-0.270851264	0.280519653	-0.018010713
EP300	turquoise	-0.276465197	-0.352325461	0.170099389	-0.153275875	0.011614979	0.505249424	0.38904056
TRIB1	turquoise	-0.023382393	-0.650209925	0.26253352	0.135312795	-0.304827178	0.734140515	0.215800489
LSS	yellow	0.317929098	-0.149346862	-0.189727041	0.441455998	-0.155342958	-0.171520788	-0.375496546
RAB13	yellow	-0.328911717	-0.502609289	-0.196884571	-0.445296284	-0.316402258	0.458817873	0.470787499
GBP1	turquoise	0.121374894	-0.166620954	0.492975457	0.438284428	-0.219713274	0.507812313	-0.254712934
SERPINF1	grey	-0.217528372	0.174583013	-0.181034701	-0.651163896	0.256475402	-0.045374185	0.18145374
CDKN1A	green	-0.433250732	-0.39804867	0.305855249	0.095661237	-0.123952704	0.532549628	0.447269994
CTSH	turquoise	-0.621428566	-0.301362556	-0.144263779	0.050903131	-0.308155211	0.845008714	0.038600028
BCR	blue	0.563510727	-0.069842157	0.037828234	0.017537701	-0.16278314	-0.067898721	0.122271205
PAM	blue	0.648233842	-0.04700204	0.317278376	-0.065279331	-0.03942256	-0.226881463	-0.221612019
ITGAV	brown	0.432810617	-0.765830823	-0.337804589	-0.290388869	-0.544621619	0.24026869	0.027943089
TCEAL4	turquoise	-0.451284687	-0.163364391	-0.039753491	-0.212652558	-0.390602664	0.79118364	-0.064172245
RGS2	turquoise	-0.346589706	-0.490365071	-0.091613203	-0.066659843	-0.210118351	0.875478928	0.175838096
BASP1	turquoise	-0.028321067	-0.718826909	-0.154046295	0.078390193	-0.36271781	0.826677748	0.212307149
KLF10	green	-0.183968614	-0.441351938	0.374721541	0.143486948	-0.303561194	0.478997266	0.140309461
IFI27	green	0.013500008	-0.327769442	0.23835181	-0.066638353	-0.51371147	0.414608217	-0.119469519
RXRA	red	0.201609242	-0.327735229	-0.163616156	-0.059300215	-0.769841185	0.587953671	-0.312775575
PLSCR1	turquoise	-0.231872585	-0.660127649	0.165184351	0.03386919	-0.383673396	0.834547506	0.291291234
MYC	brown	-0.387943439	0.821902535	0.121829359	-0.238116196	0.626169033	-0.369662446	-0.217976704
TRIB2	turquoise	0.175394307	0.656205677	0.132499809	-0.163675785	0.558568685	-0.889394993	-0.114485951
DHRS3	brown	0.418821888	0.450566748	0.150874386	0.237219339	0.072212443	-0.364869091	-0.2402264
ITPRID2	turquoise	-0.014724618	-0.776812548	0.052136593	0.073728372	-0.556066166	0.845679071	0.20446472
TNFAIP2	red	0.131372369	-0.423157295	-0.487747749	0.004201274	-0.79673854	0.60367286	-0.091400436
IRF1	turquoise	0.108342436	-0.485631831	-0.079647837	0.432670299	-0.405504381	0.662042203	-0.057870569
PRKCD	turquoise	-0.586247619	-0.317218067	-0.0034668	0.1056264	-0.25443633	0.85831922	0.023152015
GSTM3	brown	-0.139274478	0.332936986	0.355903361	0.286932187	0.047392494	-0.163553323	0.023115406
HSPA13	blue	0.510473122	-0.289657835	-0.467425572	-0.247142736	-0.014190064	-0.109307933	0.162570208
AK1	turquoise	0.605879846	0.435102693	0.455269905	-0.016812172	0.173522432	-0.771506171	-0.12833792
LEPROTL1	brown	-0.353842294	0.398386668	-0.187629303	-0.122007269	0.432194909	0.049373796	-0.106741739
EPS8	turquoise	-0.361200236	0.256548056	-0.173781171	0.161161728	-0.279834605	0.177478253	-0.32047492
GNAQ	turquoise	-0.366924191	-0.643855971	-0.080684196	-0.014894399	-0.406862586	0.906524114	0.324482213
LYN	turquoise	-0.202489263	-0.481711481	-0.164143544	0.232402303	-0.526831671	0.861602218	-0.060277628
TNFAIP3	green	0.083829875	0.209607762	0.685607697	0.064320643	0.174094579	-0.144796341	-0.110985537
NPC1	blue	0.562064669	-0.150191872	-0.421010562	0.180011348	-0.16529732	0.050962301	-0.198017452
TNFSF10	turquoise	-0.364657524	-0.536561989	-0.082922329	0.094283526	-0.398298075	0.920988273	0.061643373
STK17A	turquoise	0.291999667	0.750266697	0.308490657	0.071603046	0.42388142	-0.800487283	-0.447087293
TOB1	brown	0.079807892	-0.114855196	0.055984846	-0.204364536	0.118332605	-0.128908941	-0.286277325
H2BC21	yellow	-0.751106483	0.143294359	0.255549448	0.073041457	0.378553773	0.268382925	0.549593561
CDC16	blue	0.239384734	-0.028210197	-0.224868004	0.608018089	0.224354154	-0.012109767	-0.241606179
FOXO1	brown	-0.200734448	0.937188045	0.480145369	0.029040222	0.597555136	-0.651652768	-0.222109332
IFNGR1	turquoise	-0.300466923	-0.517821784	-0.421883665	-0.159509316	-0.394156208	0.866551989	0.01077363
LTBP1	yellow	-0.343413497	-0.258039723	0.102857807	0.00704478	0.346840795	0.081840134	0.926448305
PKIG	red	-0.241714122	0.643275019	0.474853035	0.125214296	0.943202013	-0.608601488	0.234191919
ITM2A	turquoise	0.302921233	0.5719144	0.325300544	0.189104494	0.515861946	-0.883133927	-0.074239944
GET1	yellow	-0.310172691	-0.077322642	-0.304575397	-0.213437229	0.263251246	-0.065900434	0.772880436
ACP2	turquoise	0.011177241	-0.280351991	-0.162516038	-0.01868085	-0.565809903	0.596144472	-0.35121541
FOSB	turquoise	-0.31536045	-0.061169378	0.450124827	0.212010312	0.098250361	0.46444801	-0.233893961
STK39	blue	0.744305275	-0.239299149	-0.203470607	0.199317843	-0.29678211	0.019852526	-0.39463729
MAPKAPK3	red	-0.166148987	0.081265878	-0.237753726	-0.165071916	-0.584354767	0.308744432	-0.254781212
GAA	turquoise	-0.121975241	-0.353519528	-0.08951788	0.003243077	-0.577286639	0.737791704	-0.170171498
HEXIM1	green	0.134157567	0.496981108	0.751798861	0.074356442	0.59103188	-0.364253863	-0.032935963
AHR	turquoise	-0.326354586	-0.447075304	-0.016989214	-0.245961633	-0.144057504	0.710894769	0.129744171
SERPINA1	turquoise	-0.418829347	-0.347230737	-0.199944882	0.023802491	-0.491625132	0.898921009	-0.090272614
FUCA1	red	-0.296560749	-0.28646799	-0.083055194	-0.038805802	-0.686759498	0.659651924	-0.057362989
CXCL8	turquoise	0.103617269	-0.298652038	0.587343702	0.174998963	-0.079905235	0.470944122	-0.05846137
FAH	yellow	-0.061934062	-0.565641352	-0.202810144	-0.35545526	-0.084860937	0.374231538	0.774460835
OAS1	turquoise	-0.091275305	-0.138031514	0.185067177	0.133771245	-0.171658979	0.424689952	-0.021676472
PBX2	brown	0.353162394	0.059733904	0.23500909	-0.221714828	0.202375191	0.017514936	-0.214620367
CD93	turquoise	-0.428640543	-0.584663259	-0.24902909	0.040310861	-0.476879432	0.95830933	0.114399427
DDIT4	turquoise	0.171257455	0.181289878	0.049524134	-0.283311638	-0.302226671	-0.170630955	-0.377056771
ANPEP	turquoise	-0.571893705	-0.209909157	-0.335808078	-0.261446577	0.143640641	0.565673268	0.196456578
CTSS	turquoise	-0.323124515	-0.602497168	-0.12182249	0.125127697	-0.431460719	0.955537186	0.078612791
ADM	turquoise	-0.255240809	0.026211761	0.649400159	0.039926426	0.143403825	0.41056517	0.031090594
BIN1	brown	0.181816072	0.614892494	0.475539177	-0.004805699	0.535141841	-0.615652078	-0.201982188
HK2	turquoise	-0.529188265	-0.132954389	-0.015871894	-0.056970116	-0.337581158	0.802137894	-0.214839782
BTBD3	turquoise	-0.41532277	-0.312908389	0.191246765	-0.15204308	-0.34293316	0.740079199	0.280331105
GYPC	brown	0.146310163	0.797904909	0.55424041	0.163349177	0.409371707	-0.686584276	-0.596138008
IL1R1	brown	0.143899934	-0.771066993	-0.217129236	-0.388835544	-0.468207366	0.575350909	0.32327657
FHL2	turquoise	-0.413375373	-0.038522781	-0.036631957	-0.674075929	0.093851603	0.374429737	0.071433978
CRYZ	turquoise	-0.004038073	0.467770916	-0.030143138	0.048400053	0.483571432	-0.37255158	0.054587833
C1QB	red	0.146114322	-0.09410531	0.115617274	0.233928291	-0.610582721	0.248613454	-0.13519398
MMUT	yellow	0.318096363	0.357410443	0.076784351	-0.447800218	-0.055416556	-0.287565818	-0.540589834
MPP1	turquoise	-0.539075446	-0.530954341	-0.036536245	0.003249464	-0.215936333	0.811644043	0.633355724
RHOBTB3	blue	0.716591279	-0.085960228	-0.17560146	0.221831972	-0.581190115	0.004071614	-0.448204411
RGS1	green	0.04538506	-0.108698032	0.520336652	-0.10238904	-0.087417469	0.062360737	-0.073255144
PYGL	turquoise	-0.379903739	-0.531283227	-0.135374767	0.046655715	-0.436068221	0.915623242	0.110289675
SLPI	turquoise	-0.670337927	-0.336990585	-0.092351705	-0.13176964	-0.249440112	0.616010632	0.372772197
PTPRN2	grey	-0.110987459	-0.098252987	-0.020464487	-0.362487564	-0.203251978	0.081236264	-0.081745214
PTPRK	red	-0.226908645	0.625330716	0.402815327	0.386142189	0.819184122	-0.338271531	0.099267901
CHSY1	brown	0.458024031	-0.598278211	0.36765539	-0.005710378	-0.396722594	0.383787015	0.21159848
NINJ1	blue	-0.58927557	-0.17601215	0.137315009	0.141092955	-0.023102172	0.451412955	0.115079149
PRDM2	yellow	0.115290612	0.306684239	0.389567354	0.0238042	-0.07704545	-0.108685424	-0.437032873
PAPSS2	turquoise	-0.243074679	-0.329880582	-0.067834837	0.185391038	-0.406872057	0.710253889	0.303731721
CHST15	turquoise	-0.310782243	-0.358647098	-0.077536497	0.061617528	-0.397086661	0.878356205	-0.076757573
BAZ2B	turquoise	-0.121397798	-0.692323102	-0.432698685	-0.203955421	-0.335381246	0.796420847	0.233296766
FBLN5	brown	-0.301787528	0.434366879	-0.321091544	-0.369141571	0.507313633	-0.18926265	-0.053025156
CSF1R	turquoise	-0.21633339	-0.37045972	-0.228463457	0.082897046	-0.577329007	0.861939797	-0.132075802
IMPA2	turquoise	-0.180196743	-0.558010004	0.058386124	-0.134466008	-0.591686788	0.892622472	0.019109369
SPTLC2	turquoise	-0.241638373	-0.4393613	0.222607294	-0.000457424	-0.468202133	0.871061094	-0.126688912
RB1	turquoise	-0.159357864	-0.34977004	0.461753659	0.180178546	-0.072557311	0.57235322	0.085172061
DAPK1	turquoise	-0.290226441	-0.529677828	-0.380576588	-0.019254261	-0.45784726	0.928023307	0.00655867
BCL6	turquoise	0.111139414	-0.601553187	0.116969162	0.34249798	-0.509630513	0.810242145	-0.055435986
KIAA0040	green	-0.127822538	0.192003948	0.622405998	0.146417765	0.57057382	-0.013499504	-0.083068629
GABBR1	turquoise	-0.658367843	-0.172472493	-0.41918034	-0.104953754	-0.043580949	0.598603149	0.093307518
IFIT1	turquoise	-0.220104528	-0.727808442	0.047051503	-0.012661712	-0.269031368	0.818048726	0.448789433
TIMP2	turquoise	-0.243028022	-0.556141455	-0.206288631	-0.077736561	-0.51513342	0.9633273	0.027034268
RASSF2	turquoise	-0.285707987	-0.693206443	-0.466563018	0.035888751	-0.458581046	0.908134505	0.205208707
MTRR	turquoise	0.062928738	-0.201634732	0.285870444	0.52450458	0.106896366	0.238587406	-0.181962426
KRR1	green	0.172236629	0.039889992	0.340079911	0.127040138	-0.135526966	-0.147609075	0.020737493
MTMR2	blue	0.399444794	-0.279205186	-0.0629079	-0.277584348	-0.072968901	-0.190151345	-0.137131001
MYO6	yellow	0.706244109	0.110305465	0.038487711	0.252497662	-0.294861033	-0.309989769	-0.676185161
IL4R	red	-0.326773534	0.64960329	0.2979929	0.376534925	0.731856558	-0.444000137	0.077621165
LGALS9	turquoise	-0.441155112	-0.422417765	-0.043688674	0.311433818	-0.297213444	0.859600259	0.173636466
FCGBP	red	0.037724139	0.408608677	0.23858016	-0.136279601	0.681776768	-0.270811476	-0.190932812
BRD3OS	turquoise	0.455470827	0.582943938	0.215323808	0.184035117	0.592294604	-0.770964787	-0.17496054
HDDC2	brown	0.113886186	0.607936695	0.440060686	0.076478928	0.081455414	-0.263588995	-0.649590641
LMNB1	yellow	-0.03000501	-0.224825859	0.107449456	0.004477439	-0.338178944	0.6091781	-0.240630842
HLA-DQA1	blue	-0.620033427	0.630031509	0.358798442	-0.150114734	0.183225816	0.092554241	-0.341260597
AP1S2	turquoise	-0.42388705	-0.644418384	-0.275603067	-0.173763546	-0.464502401	0.911377114	0.201459689
F13A1	yellow	-0.284504692	-0.520488442	-0.129507194	-0.183388574	0.040142237	0.345051739	0.91483567
NCK2	red	-0.340804568	0.481048591	0.356945255	-0.236650694	0.606966347	-0.319453533	0.316635888
ITGB1BP1	green	0.013608975	0.304082325	0.350080865	-0.320643684	-0.216714601	0.07865681	-0.593477812
RBBP8	turquoise	-0.276051645	-0.388198717	-0.085464165	0.186830431	-0.515041871	0.777307945	-0.014874164
DGKA	brown	-0.485410372	0.884547197	0.111880165	-0.062309318	0.678078665	-0.474011679	-0.200562417
TBC1D4	brown	-0.078420888	0.896277643	0.342564745	-0.014062111	0.48794822	-0.699589252	-0.44900186
ARMCX2	brown	0.031190095	0.853828446	0.104060986	0.146610301	0.562357276	-0.608037367	-0.419432546
MFAP1	turquoise	0.071340208	-0.208488914	-0.315122314	-0.102669164	0.024620083	0.328196034	0.025610306
SATB1	brown	-0.103479731	0.958505877	0.323519169	-0.089715416	0.51381339	-0.570310032	-0.477957655
DDB2	blue	0.551598774	0.064085097	0.120260524	0.040970644	-0.329418895	-0.207222369	-0.517169401
NELL2	brown	-0.321758746	0.912013897	0.279396084	0.072203955	0.623782982	-0.488459053	-0.338790074
MMD	yellow	-0.202452521	-0.401839723	0.075301824	-0.129231475	0.011859322	0.23813123	0.920982992
ASF1A	green	0.409394589	0.189855533	-0.095690628	0.214495003	0.344584355	-0.355956298	0.095705766
SAT1	turquoise	-0.280968141	-0.68150731	-0.05362246	0.261424655	-0.39958846	0.893580926	0.223159621
MRPL19	yellow	0.382991167	-0.096483827	0.019788595	-0.304007223	-0.098059058	0.072733883	-0.271441786
TPBG	turquoise	0.295682214	0.026556831	0.096511827	-0.03459775	-0.132154813	-0.538316625	0.061960607
RTN1	turquoise	-0.181209793	-0.578492958	-0.32480248	-0.069595925	-0.750076961	0.786557449	0.216159848
CPQ	turquoise	0.05011355	-0.43949168	-0.004421032	0.166108415	-0.515834934	0.595192923	0.267882936
BPGM	yellow	0.675388006	0.33393036	0.325825974	0.366091254	0.082495348	-0.296158513	-0.530931826
TNFRSF1B	turquoise	-0.210717087	-0.440185344	-0.412730492	0.074302391	-0.62658893	0.772022926	-0.133794106
S100A9	turquoise	-0.466257771	-0.446731716	-0.131732919	-0.052037663	-0.456650225	0.869653276	-0.04977557
FEZ1	blue	0.588407894	-0.013183528	0.120672003	0.365138268	-0.316794264	-0.144388845	-0.383934313
OFD1	turquoise	-0.038955573	0.382301997	0.242106906	-0.263596345	0.386193193	-0.375496105	-0.238780021
NFIL3	green	0.224872026	-0.261837965	0.552109872	0.296745181	-0.259139844	0.182070852	-0.000344603
ZNF185	yellow	-0.431289463	-0.513822702	-0.038401653	-0.012283924	-0.096310588	0.464029555	0.880589122
TFDP2	blue	0.861123176	0.106295893	0.169123169	0.163857281	-0.222690836	-0.288140711	-0.346320886
IFIT5	brown	0.217342956	-0.371145253	0.495982578	0.209011467	0.065794032	0.28077658	0.465782397
ZEB2	brown	0.389533424	-0.816483497	0.066082247	0.060846977	-0.559793279	0.602768822	0.091715726
ZNF516	turquoise	-0.441695567	-0.423817221	-0.208248836	0.010571011	-0.256643703	0.926276548	0.048716309
INPP5F	green	0.000950558	-0.180029176	-0.32994955	0.191533369	0.280643669	0.166649689	0.101158448
ALDH5A1	yellow	0.013223881	0.640487164	-0.166196728	-0.267025314	0.25716416	-0.382727321	-0.607458282
SULT1A1	blue	-0.646604319	-0.381500961	-0.434734973	-0.091441383	0.030813847	0.490660454	0.51601396
COG5	green	-0.087373254	0.464376673	0.581991595	-0.199962507	0.114040432	0.069901744	-0.283205849
CPT1A	blue	0.667442242	-0.439162212	0.169816782	-0.1482385	-0.646871924	0.178605789	-0.095054085
CD163	turquoise	-0.341902815	-0.589874568	-0.214890242	-0.48488223	-0.43025684	0.842621877	0.188885707
PROCR	blue	0.785945908	-0.308573789	-0.012174656	0.266782609	-0.242476041	-0.048594426	-0.418270994
SLC25A20	blue	0.769443127	-0.485313064	0.197664439	0.04584901	-0.577878029	0.140700554	-0.085957467
HMOX1	turquoise	-0.354655123	-0.45044241	-0.169408388	0.037745685	-0.473694014	0.883827924	0.001956369
MAN2C1	yellow	-0.057543092	-0.529907185	0.053520961	0.017805071	-0.017408631	0.234212097	0.60416207
NUCB2	brown	0.005983792	0.848051858	0.318980397	-0.060370637	0.217320612	-0.414868516	-0.745449659
PRKAR2B	yellow	-0.365940347	-0.195101069	-0.051526679	-0.183989761	0.224443097	0.071065855	0.94628953
VEGFB	turquoise	0.37535107	0.343428267	0.296905083	-0.210139679	0.520361567	-0.497994644	-0.048991407
PI3	turquoise	-0.289344475	-0.664249419	-0.058052303	-5.07E-05	-0.461444056	0.898477181	0.087580387
PDE4B	red	0.002926791	0.47515531	0.571194801	-0.250637087	0.64272775	-0.387527153	0.177399555
DPP4	red	-0.187159915	0.671008362	0.524027873	-0.02371546	0.727466435	-0.51005232	0.309821517
ZNF217	turquoise	0.148334711	-0.455111476	-0.458030945	0.113037186	-0.334800556	0.540592346	0.125935649
JUND	green	0.127818943	0.438451438	0.81007082	0.125558782	0.248005238	-0.359542211	-0.137463841
TCF4	red	-0.483610332	0.343406401	0.073732402	-0.447052604	0.702773099	-0.265792474	0.361159461
CEACAM6	blue	-0.477743304	0.333123058	-0.001672441	-0.060930652	-0.078789026	0.119964278	0.102192256
SLA	green	-0.181008362	-0.192532585	-0.753067928	-0.022118442	-0.315836713	0.244310141	-0.191235597
GCA	turquoise	-0.194635991	-0.677634248	-0.191995672	0.022740438	-0.512052449	0.97643355	0.10252326
STS	turquoise	-0.350601012	-0.39568733	0.132935489	-0.26082615	-0.073605412	0.759145106	0.107842736
BLVRA	turquoise	-0.258859746	-0.414911611	0.216683645	-0.126813102	-0.502836025	0.767258631	-0.178584816
BCL7A	red	-0.478922187	0.572769817	0.207452295	-0.026411164	0.937703153	-0.352669895	0.223413935
LUC7L3	green	-0.024568135	-0.445165845	-0.797334039	0.022419076	-0.52546144	0.32676629	-0.096216302
NQO2	turquoise	-0.44437109	-0.178256958	-0.243079079	0.015635999	-0.480413165	0.470243104	-0.166472876
GSTT1	brown	0.046207595	0.520186542	0.470005037	0.370818258	-0.003117482	-0.04740204	-0.505279271
GUCY1B1	yellow	-0.298301227	-0.429600026	-0.018307645	-0.095887652	-0.058782734	0.430943407	0.873095742
HBEGF	green	-0.445496899	-0.125673425	0.325535178	-0.061906131	-0.242655087	0.373458161	0.106861466
IL32	turquoise	0.473007073	0.379044363	0.183800321	0.207635874	0.537301739	-0.889611507	-0.10582124
TRIM32	turquoise	0.474813664	0.513950896	0.220904599	0.029734396	0.421762388	-0.720758946	-0.213789924
GAB2	turquoise	-0.171347983	-0.7066668	-0.250118956	0.122136188	-0.466937856	0.918556173	0.280252156
ADARB1	turquoise	-0.112643748	0.687682529	0.245710673	-0.039316866	0.688940617	-0.706502946	-0.253618372
USP46	yellow	0.402862756	-0.320103082	-0.012597617	-0.212171373	0.086376689	-0.081623908	0.386445952
THBD	turquoise	-0.358953532	-0.45339321	-0.513582811	0.079962959	-0.469707422	0.825300727	-0.080890823
CD82	blue	-0.604390495	-0.016003053	0.017405954	0.126000183	0.566660769	0.031843223	0.482006584
HPGD	green	0.363136394	0.032371434	0.224153928	0.350061224	0.413410549	-0.243348092	0.334471128
CHST2	blue	0.480573788	-0.018716258	0.079830376	0.338641787	-0.500876564	0.161463869	-0.188466134
CYBB	turquoise	-0.465489632	-0.362483661	-0.118702084	0.04237142	-0.527901911	0.882262967	-0.135540866
HLA-DMB	turquoise	-0.437449008	-0.413001041	-0.002711634	0.207885079	-0.21136178	0.719441192	0.163389294
MMP9	green	0.086997772	-0.202064475	0.273689415	0.165421154	-0.065305414	-0.040698723	0.266069329
NEBL	yellow	0.132566683	0.014631942	0.217485582	0.12086157	-0.374296832	0.149591223	-0.445929684
NMI	turquoise	0.016082521	-0.333465421	0.129369702	0.154264199	-0.316452075	0.729058076	-0.146043269
SLC31A1	turquoise	-0.310152008	-0.652281254	-0.126303078	-0.223461958	-0.475190173	0.958370601	0.164015699
CEBPD	turquoise	-0.40990505	-0.618297756	-0.396836676	-0.137745498	-0.558331903	0.956450314	0.143049296
PUDP	turquoise	-0.518781871	-0.190950713	0.192817078	-0.341405756	0.091607475	0.51882367	0.119531408
KDM6A	green	0.09361252	0.41470103	0.649812898	0.029865343	0.702558793	-0.490646734	0.078977538
FCGR3B	turquoise	0.390724825	-0.487201962	0.109950831	0.53854069	-0.398797685	0.456004898	-0.158106156
ZWINT	turquoise	-0.294573569	0.344449121	-0.037805755	0.263480539	0.121689978	0.212756598	-0.316384302
LPAR1	turquoise	-0.503093968	-0.24099359	0.222149063	0.054836002	-0.359191503	0.776759831	-0.091048855
CEBPA	turquoise	-0.370541109	-0.459764409	0.028846924	0.118380751	-0.447935197	0.874211226	-0.117988587
WASF3	yellow	-0.146773663	-0.236589882	-0.155137386	-0.121264267	0.248363303	-0.142512989	0.902475075
PRKX	turquoise	-0.43075416	-0.056054182	0.136246114	-0.304075352	0.18291885	0.352503045	-0.00584244
AGAP1	blue	0.81368843	-0.194638112	-0.027173787	0.008771312	-0.160961429	-0.403623131	-0.139832189
TPST2	blue	0.802936507	-0.233788724	-0.086169947	0.01295406	-0.114065019	-0.378929212	0.131675338
NRGN	yellow	-0.287268058	-0.270829381	-0.013794695	-0.080931385	0.188379112	0.067009679	0.97404138
TPM2	brown	0.151359989	0.439384765	-0.106018456	-0.563533154	0.001961645	-0.297534064	-0.233782804
CLN5	turquoise	-0.377141255	-0.150174777	-0.119320446	-0.071509189	-0.24813342	0.799183119	-0.241195946
CCL4	blue	0.788003308	-0.336514924	-0.071916334	-0.042451281	-0.594572399	-0.024834035	-0.274534889
NRCAM	brown	-0.069075277	0.628346448	0.147371684	0.275861278	0.354997171	-0.253534223	-0.076763853
GNG11	yellow	-0.276373753	-0.333038514	0.008510881	0.026797374	0.192525727	0.078941428	0.98085695
ADK	blue	-0.640572842	0.257015974	0.305436942	-0.218049134	0.334031157	0.164144609	0.103425888
TYROBP	turquoise	-0.295523896	-0.552091448	-0.276845538	-0.067715874	-0.685968329	0.899798526	-0.017069111
TUBB2A	grey	-0.200495318	0.049793524	0.349363723	0.266771316	0.301504581	-0.184227647	0.236069454
ENOSF1	yellow	0.376075595	0.463455727	0.089565931	0.392236513	-0.026286139	-0.271823459	-0.686576676
GSTM4	yellow	0.636463382	0.324401246	0.037450136	0.233724679	-0.010336045	-0.249525944	-0.680853295
ENPP4	blue	0.86045854	-0.049992162	0.144338994	0.191203287	0.046500098	-0.51275386	-0.048969305
MGST2	turquoise	-0.336128439	-0.441082541	-0.292995537	-0.28794607	-0.688311859	0.771975619	0.001060069
GMPR	yellow	-0.472855699	-0.501185141	0.028526083	0.009143603	0.079761867	0.516664001	0.858712612
CD37	brown	-0.499249768	0.843454264	0.30885543	0.089242271	0.733775634	-0.488474669	-0.118209337
CHKB	turquoise	0.37724225	0.235309622	-0.050638305	-0.148443537	0.330834825	-0.627447717	-0.00082142
BACH1	turquoise	-0.282893223	-0.670679331	-0.11453607	0.118570035	-0.313238525	0.938351787	0.250827179
RUNX3	blue	0.9405802	0.054488203	0.134856327	0.154341119	-0.262763433	-0.47439441	-0.389046642
SLC31A2	turquoise	-0.264354102	-0.493789064	-0.109119124	0.150876414	-0.515420442	0.933702288	-0.082636054
APOBEC3G	blue	0.893389631	-0.245471615	-0.056977345	0.043196787	-0.285869899	-0.417301502	-0.218133691
PCYT1A	blue	0.370123313	-0.147694002	-0.214578428	-0.017926913	-0.04803795	0.06870951	-0.268511647
EIF2AK2	turquoise	-0.278041055	-0.421633118	0.419075575	-0.212600759	-0.084882274	0.534379874	0.256793357
RAB32	turquoise	-0.491168009	-0.671905396	-0.343641731	-0.158802393	-0.456673043	0.894538708	0.420597847
GLIPR1	turquoise	-0.319867781	-0.122045922	-0.22113261	-0.13362427	0.009596252	0.580888955	-0.076923979
GCH1	turquoise	0.059702183	-0.168731376	0.251351374	0.537171743	-0.258381096	0.530449499	-0.293756556
LMO2	turquoise	-0.274980842	-0.566034712	-0.079064437	0.129073826	-0.58006426	0.921356041	-0.089961667
ELOVL6	blue	0.79007377	-0.276097347	-0.084830858	0.248764367	-0.535056896	-0.070918527	-0.248148594
PIM2	green	-0.001453819	0.738026347	0.656295903	0.187580303	0.698236113	-0.483400558	-0.06581527
PMAIP1	green	-0.027972021	-0.161793814	0.294110748	0.181954655	-0.195078814	0.130203607	-0.168334302
AMT	brown	-0.139824876	0.572873312	-0.12671171	-0.222059405	0.049101475	0.022242722	-0.651970154
CD151	yellow	0.152107242	-0.412589148	0.255434015	0.237146034	-0.004594436	0.219817745	0.402564228
CREB1	green	-0.046194321	0.32722509	0.774026849	0.260307588	0.400621823	-0.037651887	0.069895962
MT1X	yellow	0.127292313	0.298039682	0.049665895	0.051107837	0.067736194	-0.280763439	-0.395837032
RASSF1	blue	0.88577638	-0.122983739	0.002811489	0.248902886	-0.081556194	-0.543480024	-0.187089418
MED7	green	0.449111707	-0.1577021	-0.424595669	0.032424454	-0.041816378	0.10055327	-0.299135451
S100P	turquoise	-0.027474287	0.099085604	-0.174364522	0.023861303	-0.336179667	0.284161321	-0.331193052
SKAP2	turquoise	-0.547700017	-0.596259446	-0.183446451	0.107573549	-0.365820181	0.887383962	0.260033719
KYNU	turquoise	-0.217902452	-0.236683567	0.202336439	0.199034784	-0.327064529	0.737161824	0.197465323
ACP3	turquoise	-0.397271701	-0.38907974	-0.049690687	0.441771809	-0.292853367	0.695792969	-0.083173577
KCNN4	red	-0.572602532	0.260589693	-0.166956355	0.208945367	0.727454984	-0.120344777	0.292181582
EIF1AY	blue	0.352438996	-0.010755423	-0.321822238	0.276828079	-0.249407676	-0.137336763	-0.157164151
IFI6	turquoise	-0.279767647	-0.615440613	0.203949555	-0.068488713	-0.36953767	0.790545943	0.283019754
GALC	turquoise	0.146421877	-0.168388127	-0.003806951	-0.116673293	-0.173649167	0.371549454	-0.117558151
GSTM2	turquoise	0.151139861	0.765316107	0.022127899	-0.236256819	0.362114544	-0.759452169	-0.234057245
IFI44L	turquoise	-0.22783717	-0.601568691	0.190918669	-0.056793752	-0.339298744	0.702654543	0.329153116
CD83	green	-0.018312982	-0.024072138	0.711000234	0.334786122	0.114053305	0.097496808	-0.020250631
FZD1	turquoise	0.02888732	-0.615582165	0.05029104	0.046457894	-0.58392423	0.819944146	-0.102894971
ZNF84	brown	0.115364739	0.812489348	0.338958912	0.163098203	0.602312958	-0.617507848	-0.264222335
SNCA	brown	0.356349882	-0.694894416	-0.037752111	0.126557423	-0.231295491	0.087080133	0.708226477
CXCL1	turquoise	-0.207872877	-0.490099681	-0.00293688	0.107703941	0.041614723	0.694000747	0.137086917
CLDN5	yellow	0.048161709	-0.282665961	0.238877468	-0.121667484	0.05053937	0.251894355	0.6720265
PIK3C2B	red	-0.12809704	0.352222489	0.201488864	0.133540364	0.886839895	-0.530384191	0.228183756
BID	turquoise	-0.272668693	-0.444600839	-0.332592544	0.166260629	-0.549985635	0.884099706	-0.008912535
C15orf39	turquoise	-0.070653712	-0.568399271	-0.05849177	0.399256388	-0.615549598	0.727350834	-0.151672691
ADCY9	blue	0.790912046	-0.424514062	-0.260253835	0.033927112	-0.264313971	-0.179645404	-0.084144095
DMTN	yellow	0.013865133	-0.325720576	-0.059993066	0.068764372	0.194469499	-0.141998028	0.891989495
PPP3R1	yellow	0.165650175	-0.194252118	0.024938329	-0.02759626	0.046542767	0.134658466	0.385413443
TBC1D8	turquoise	-0.279408052	-0.364422573	-0.461093327	0.168603103	-0.40621015	0.759630817	0.022447926
TOX	blue	0.725125961	-0.075559451	0.0716325	-0.070191108	-0.047758059	-0.491042236	-0.036578052
CXCL10	turquoise	-0.27053623	-0.437304835	0.205920304	0.24559825	-0.328015473	0.80227911	0.138598791
GSTM1	turquoise	0.302282327	0.77298637	0.190104207	-0.133131329	0.377359581	-0.78888899	-0.334148896
PPP1R3D	turquoise	0.460447343	-0.559985211	-0.268343505	0.261761671	-0.200975423	0.414567269	0.076935167
FKBP5	yellow	-0.297640672	0.575800462	0.348680136	-0.171571582	0.132078002	0.173125659	-0.549544659
IRF4	yellow	-0.159140399	-0.190351696	-0.240901805	-0.1464629	0.218665764	-0.140235343	0.453782601
CLUAP1	brown	-0.240625231	0.812478742	0.19815354	-0.010252686	0.532584403	-0.32122418	-0.150255927
CD22	red	-0.334862352	0.64333981	0.296594987	0.337436119	0.931961979	-0.441990922	-0.030448371
SLC7A7	turquoise	-0.626769065	-0.28641026	-0.218474038	-0.126023461	-0.425145642	0.84645508	0.090745438
NUAK1	yellow	0.307990148	-0.033620517	0.029326752	0.225201893	0.103860056	-0.274949746	0.474499337
CDK14	yellow	-0.421859806	0.081281546	-0.054694558	-0.144050331	0.639777816	-0.080343948	0.67851307
PKIA	brown	-0.219101914	0.61131372	0.193311012	0.018741129	0.61263753	-0.553451774	0.151007794
SERPINB2	turquoise	-0.302318121	-0.606114465	0.075556599	-0.1428322	-0.330444355	0.74803353	0.489471851
VCAN	turquoise	-0.292835078	-0.66860851	-0.156717052	-0.242491764	-0.510995396	0.86589728	0.17276534
NR4A2	green	-0.128650849	-0.316428654	0.375666582	0.190478528	-0.124664007	0.399710736	-0.125216259
PARVB	yellow	-0.323989276	-0.537340708	-0.178555349	0.102488249	0.045456705	0.400253969	0.8972268
ACP5	turquoise	0.437571458	0.39384705	0.526194812	0.292629218	0.371672303	-0.424340131	-0.02523568
NEK2	green	0.161995327	0.102699213	-0.313768292	-0.469823876	-0.073788787	-0.10143516	-0.325566461
S1PR1	green	0.266208294	-0.034520725	-0.382860239	-0.23715843	0.302584207	-0.200112013	0.065301248
CD52	turquoise	0.393964285	0.549541325	0.529269303	0.069867781	0.345362246	-0.699358366	-0.486836892
ME3	red	0.383060055	-0.1909657	-0.154279456	-0.60088153	-0.526188068	-0.148689444	-0.269688746
HHEX	turquoise	-0.38379073	-0.592209317	-0.2064791	0.19856419	-0.212810102	0.917837111	0.219622693
F5	turquoise	-0.429171015	-0.359278192	-0.189681451	-0.08204278	-0.189161197	0.683754117	-0.080464682
PANX1	blue	0.645183306	-0.245218587	0.227044002	0.132356118	-0.048079089	-0.205652003	0.023349435
TGFBR3	blue	0.951008474	-0.288516144	0.059571165	0.109241751	-0.335546284	-0.347661826	-0.122105385
IFIT3	turquoise	-0.211053249	-0.74317491	0.021016033	-0.003068685	-0.392910591	0.869823729	0.31353024
NAP1L3	brown	0.071799408	0.873378174	0.27070757	0.167710187	0.584019253	-0.640986138	-0.303085173
TAP2	blue	0.792949277	-0.146488967	0.110892816	0.256152025	0.036892155	-0.235904243	-0.285571486
MAL	brown	-0.283941079	0.928463331	0.287425501	0.050333387	0.535553415	-0.606740908	-0.225544926
FAS	brown	-0.182896538	-0.802958791	-0.127262503	-0.121765352	-0.328460397	0.66991648	0.349373474
VSIG4	brown	0.219230739	-0.729401348	-0.084329137	-0.375742129	-0.53794923	0.547384186	0.247682818
SMAD7	blue	0.93457759	-0.299029988	0.02949257	0.089452207	-0.378925713	-0.239208973	-0.198580828
GPRASP1	brown	-0.193125173	0.798334527	0.021763115	-0.180402176	0.611825742	-0.681519304	-0.274011844
DUSP2	green	0.110593221	0.466240442	0.709101908	0.089222475	0.343914425	-0.37508897	-0.16103924
MYB	brown	-0.422659676	0.820173437	0.503385993	0.090687598	0.58775221	-0.285924309	-0.135946132
CACNA2D2	blue	0.916879215	-0.061483488	-0.074843512	0.181515149	-0.226489017	-0.476256607	-0.282361658
FGL2	turquoise	-0.354279414	-0.565216427	-0.306200198	-0.005728661	-0.515744215	0.95804197	0.022798829
GLDC	turquoise	0.514194659	-0.149975276	0.411857427	-0.183086875	-0.075322698	-0.40365289	0.238716125
MLH3	yellow	-0.286245329	-0.470603674	-0.42263715	-0.056419592	-0.040019479	0.156205107	0.642089279
TCFL5	turquoise	0.146809901	0.028252916	-0.012718591	-0.072020361	-0.05010266	0.133474983	-0.034242751
MAD1L1	turquoise	0.366518779	0.198353654	0.153004846	0.526393496	0.447173697	-0.506955096	0.021793837
TYMP	turquoise	-0.288030306	-0.401780029	0.252796541	0.22269877	-0.248747804	0.782741829	0.118258644
APAF1	turquoise	-0.165542703	-0.644836814	-0.299495549	-0.141819866	-0.659707326	0.925941968	-0.118370655
NAIP	turquoise	-0.110013633	-0.196701824	-0.299287399	-0.025058931	-0.425624024	0.633359357	-0.369972987
IL6ST	brown	-0.147548126	0.791060428	0.301545052	-0.391200568	0.232260635	-0.250564957	-0.508337673
UGCG	brown	-0.321573202	0.490845484	-0.160054399	-0.571307426	0.157497833	-0.101128398	-0.309663461
LCK	turquoise	0.289456701	0.751596154	0.161900597	-0.050612225	0.413884498	-0.893034254	-0.475859891
TLR2	turquoise	-0.242354853	-0.551706486	-0.134431978	0.113483653	-0.410351382	0.916572059	-0.150329031
RHOH	red	-0.010119072	0.745171025	0.253286316	0.155149565	0.853848368	-0.789661806	-0.158685139
MNDA	turquoise	-0.308860928	-0.666167057	-0.326198017	0.045835644	-0.500909215	0.956756222	0.118755105
PTPRCAP	turquoise	0.486038665	0.577831716	0.295914467	-0.021795581	0.388177951	-0.943518226	-0.316990721
CSTA	turquoise	-0.547466874	-0.474162103	-0.169837419	-0.065914947	-0.45319589	0.944190255	0.041563586
OAS2	turquoise	-0.257743719	-0.582283078	0.245144121	-0.02842736	-0.217257064	0.766573049	0.262396255
SLC22A18	blue	0.414010603	-0.224081457	-0.12468353	0.390909143	-0.198865967	-0.022169601	0.435171298
PFN2	turquoise	0.155724695	0.332341641	-0.132966534	0.051475518	0.49593876	-0.652026742	0.38920046
GNAZ	yellow	-0.152820624	-0.290311734	-0.146295108	0.040694554	0.256421966	-0.021768883	0.942643739
MX2	turquoise	-0.238318294	-0.673183846	-0.014202996	-0.085251967	-0.403457681	0.827147874	0.259844403
ARL4A	green	-0.181726688	-0.166701965	0.372665239	0.382731757	-0.012698209	0.306641932	-0.163237224
MAP3K8	turquoise	0.453249637	-0.385216803	-0.023199592	0.125011921	-0.222134581	0.326831821	0.023982829
ASNS	brown	0.049509652	0.877547174	0.266500587	-0.061746477	0.649136265	-0.813567464	-0.386958905
NEB	green	0.108716475	0.067388956	0.57629773	-0.166819803	-0.318015432	0.323569395	-0.291835039
IL1B	turquoise	0.060193133	-0.174745357	0.357514884	0.234872495	-0.248476824	0.499381589	-0.178921991
ARHGAP26	turquoise	0.206691818	-0.737753976	-0.154291178	-0.090998209	-0.598728768	0.701827665	-0.162946602
CRIP1	red	0.392905507	-0.573684224	-0.173721424	-0.438095683	-0.306548063	0.03707049	0.44678882
RECQL	blue	0.605927159	-0.182749875	0.274809023	0.326901977	-0.180575898	-0.127952661	-0.405847057
CCR1	turquoise	-0.261956677	-0.583667612	-0.015441069	-0.012634846	-0.341309184	0.911232715	0.14881175
CIITA	turquoise	-0.555829654	-0.155318688	-0.150498178	0.175741921	0.326478682	0.547342365	0.276175903
PTGS1	yellow	-0.130191692	-0.514406852	-0.069269415	-0.154989472	-0.083817786	0.181834582	0.915760322
NPM3	green	-0.210091908	0.472605485	0.324241946	-0.062927455	0.231955959	-0.179042808	0.083125646
ANG	turquoise	-0.101910673	-0.465839871	-0.030968205	-0.496629878	-0.276194099	0.50688802	0.323398957
NCF4	turquoise	-0.506737856	-0.510365695	-0.222228882	-0.028737275	-0.235814805	0.931953097	0.279469631
CD40	red	-0.508299827	0.75792503	0.436767402	0.242597204	0.776394738	-0.298682985	-0.109504503
RNASE4	turquoise	-0.18543293	-0.494695189	-0.043562272	-0.553710211	-0.262868919	0.589785053	0.24451877
CSF2RB	turquoise	-0.11609215	-0.662141887	-0.217352816	0.136831252	-0.644700192	0.942407479	0.043339437
PTPN4	blue	0.871385452	0.190683823	0.199507987	0.251633746	-0.040988581	-0.588792113	-0.244066372
CD58	brown	0.108296144	-0.807247194	-0.035455515	-0.007937115	-0.677007018	0.686986753	0.126439272
QPCT	turquoise	-0.295742756	-0.619775193	-0.1247995	-0.003656385	-0.333589866	0.842298925	0.138267557
ITGB3BP	blue	-0.596260255	0.3859695	0.471594163	0.104340843	0.509208474	-0.060317598	0.32136104
ATP7A	blue	0.192120685	0.050165008	-0.091303989	-0.383014585	-0.241560594	-0.144618015	-0.24850814
IL6	green	-0.369487045	-0.108549672	0.358198212	0.515423808	0.06521179	0.237593791	0.086700183
STK17B	green	0.058823196	0.179729085	0.70183954	0.08111673	-0.08851285	-0.036709982	-0.386993217
HCAR3	turquoise	-0.006251875	-0.544973079	0.030262417	0.240263813	-0.563242985	0.867472224	-0.163211274
HGD	yellow	-0.692507049	-0.271951327	-0.147518042	-0.004846557	0.159811368	0.358824368	0.687590194
RPH3A	yellow	0.006380595	0.249002904	0.081284252	0.436228511	0.268891448	0.036828992	-0.475610815
FCN1	turquoise	-0.735439616	-0.218359906	-0.004634722	-0.019624387	-0.185445874	0.739964766	0.121453039
SCO2	turquoise	-0.151586569	-0.573537169	0.110579859	-0.061131618	-0.502790929	0.763630562	-0.000844222
TCF7	brown	-0.277971306	0.978416398	0.34267465	-0.039208056	0.57029312	-0.604168662	-0.373567447
NR3C2	brown	-0.00357999	0.850302879	0.328568784	0.161022827	0.594478612	-0.762013508	-0.249118731
POU2AF1	red	-0.134722844	0.534003248	0.228565068	0.209761599	0.941849772	-0.663791	0.199188923
IL2RB	blue	0.877031499	-0.085840867	0.000136516	0.226206498	-0.522364577	-0.262356354	-0.315991561
KMO	turquoise	-0.538516292	0.056759273	0.372173404	0.15642407	0.293634359	0.576661252	0.158611539
SPI1	turquoise	-0.30450288	-0.340372698	-0.180930908	0.136706253	-0.472919481	0.881807292	-0.265313232
SLC15A2	turquoise	-0.560117733	0.045798201	-0.25906978	0.254605095	0.386664456	0.357360073	0.115222399
EIF2S3	brown	-0.49619821	0.593159414	0.702693571	-0.013486238	0.568467359	-0.15568451	0.183297616
ACVR2A	blue	0.432936748	0.044804595	0.158845509	0.350287765	-0.117681779	0.09855551	-0.222847236
PVALB	yellow	0.091971924	-0.188190336	-0.065881209	-0.103294075	0.262200251	-0.372815159	0.820277973
GNA15	turquoise	-0.209981183	-0.671501319	-0.2870552	-0.183722862	-0.536696647	0.89812938	0.324826285
CBR3	brown	-0.335329786	0.630330234	0.10881375	-0.239061225	0.526595623	-0.310941447	-0.329888387
CFD	turquoise	-0.35897003	-0.462464222	-0.050731786	-0.202572193	-0.657886889	0.842678446	0.174450724
IL1R2	turquoise	0.212793642	-0.706097438	-0.308299442	-0.057234077	-0.548781719	0.60050094	0.023319438
FES	turquoise	-0.221692169	-0.515806534	-0.494948078	0.084387874	-0.572624564	0.864453691	-0.116179191
GPR183	brown	0.107854779	-0.400129664	-0.432558617	-0.178717997	0.235290591	0.095887036	0.245197773
H2AX	green	0.293595928	0.587341728	0.738087282	0.019820289	0.399948654	-0.338778067	-0.366790201
SNAPC1	yellow	0.180107629	0.086894864	-0.115498691	-0.314348494	0.111698789	0.07497623	-0.424997338
MC1R	brown	-0.107864594	0.60566621	0.0299645	-0.242755733	0.59283275	-0.550593085	-0.263368069
PDGFA	yellow	-0.419147653	-0.453068371	0.169053489	-0.010780218	0.090825689	0.395662713	0.810570645
IRF5	turquoise	-0.065184357	-0.186580452	-0.381946014	0.08307258	-0.045756118	0.316495272	0.224835907
ISG15	turquoise	-0.14795813	-0.655923412	0.22412669	-0.071181877	-0.290670261	0.683173451	0.383160748
SIT1	turquoise	0.289881882	0.036692909	0.361703625	0.256573221	0.451275005	-0.441348125	0.263093849
GZMA	blue	0.898793105	-0.01099317	0.036785926	0.116518105	-0.211921093	-0.509356459	-0.419915671
GNLY	blue	0.849794973	-0.035266877	-0.151099319	0.152454901	-0.385742254	-0.339090685	-0.393797014
BTK	turquoise	-0.609252475	-0.316411783	0.139418029	0.045971303	-0.120506798	0.866578131	0.199612768
SCN1B	yellow	-0.270021457	-0.304111565	-0.096793807	0.123271186	0.244012031	0.197154502	0.926741281
TCN1	brown	-0.150068983	0.396895861	0.295973018	0.309605182	-0.154725701	0.016105258	-0.197830303
GSPT2	turquoise	0.323066019	0.415893291	0.062423334	0.227741091	0.613899826	-0.452868618	-0.138061098
CR2	red	-0.123548453	0.728318526	0.352077913	0.232339704	0.903519474	-0.519009624	-0.239028223
PCSK5	yellow	0.014408326	0.181179177	0.443879576	0.132854393	-0.359906992	0.319523983	-0.630142139
AQP9	turquoise	-0.047943567	-0.58160322	-0.099567822	0.195511165	-0.297292247	0.814318183	0.160696758
LAMP3	turquoise	-0.122585625	-0.236701917	0.21039706	-0.256292617	-0.113902693	0.510493048	-0.068144241
SNX7	turquoise	-0.227474609	-0.5664461	-0.295128697	-0.524182791	-0.108561178	0.491723125	0.376125242
RASGRP1	turquoise	0.33155288	0.588288726	0.086184934	0.077686116	0.540380973	-0.926537482	-0.157676674
ZNF652	yellow	-0.073296146	-0.225513616	-0.404682841	0.090561301	0.377184319	-0.15267984	0.565605743
CPA3	brown	-0.068173291	0.347039711	0.379471859	0.307712804	-0.295601129	-0.012907362	-0.293720778
CDA	turquoise	-0.452009107	-0.274300442	0.0531625	-0.224571695	-0.305306452	0.74622778	0.102639648
AOAH	turquoise	-0.114737274	-0.200640926	-0.003391567	-0.154998818	-0.723109232	0.653688241	-0.353087679
CTSG	brown	-0.429015833	0.55185903	0.108185403	-0.142199517	0.16959009	-0.115703013	0.027558182
OASL	brown	0.203457999	-0.787677155	-0.097157404	-0.276019387	-0.503126595	0.583707191	0.101631569
LY75	turquoise	0.567173622	0.501552489	-0.007478151	-0.230136386	-0.003751415	-0.565677413	-0.366838129
DLEU1	turquoise	0.282411518	0.570406966	0.237571782	-0.328563592	0.488445672	-0.757585963	-0.229499288
BCL2A1	turquoise	-0.116909852	-0.160407617	0.31126963	0.50766101	-0.157248809	0.557925137	-0.235240817
CD86	turquoise	-0.326133036	-0.665168357	-0.155544117	0.059271661	-0.498871377	0.964292952	0.211456516
CD38	green	0.183582696	0.159640679	0.441292958	0.533522036	0.089293573	-0.014000544	-0.069730571
BST1	turquoise	-0.702205576	-0.212041265	0.043399363	0.20672006	-0.14186565	0.772516536	0.009498266
ITGB7	turquoise	0.604617261	0.427643099	0.238195343	0.003117185	0.35155318	-0.710405895	-0.437410805
ABLIM3	yellow	-0.101279733	-0.471129239	0.006319032	0.043141777	0.109534098	0.113703501	0.916340853
NCOA2	green	0.21865582	-0.13495352	-0.38732049	-0.537157151	-0.302919493	0.005831865	-0.297376774
F8	green	0.169936883	-0.137715486	0.473717111	0.103932169	-0.122389013	0.117179147	-0.363556831
CD8A	blue	0.596259427	-0.119674988	0.304934443	-0.064650044	0.016279387	-0.257270467	-0.173916301
BIK	green	-0.318051869	-0.043219402	-0.605970663	-0.068316304	0.084834003	0.030600285	0.265044415
CD1D	turquoise	-0.275257025	-0.602851744	-0.180141078	-0.229275057	-0.361823251	0.859154197	0.343522968
TCP11L1	yellow	0.091443552	-0.36846284	0.008865459	0.430695223	0.038285439	0.074515148	0.74034289
IL7R	brown	-0.454440131	0.677012206	-0.218649299	-0.305291508	0.524904146	-0.326872352	-0.107918034
RASGRP3	red	-0.113433973	0.367254229	0.529063699	0.201514944	0.750443278	-0.271332971	0.27106862
MARCO	brown	-0.254448578	-0.664846957	-0.096164285	0.066265621	0.115405288	0.41329625	0.528963533
MYOM2	turquoise	-0.106136319	0.066369476	0.196252617	0.25597977	-0.188256689	-0.176900248	0.080488018
CD2	turquoise	0.281115088	0.255862628	0.237588463	-0.383472538	0.461941937	-0.642185666	-0.087745289
TSPOAP1	blue	0.764572315	-0.066991737	0.049621901	-0.206251759	-0.516319853	-0.227489958	-0.37885327
SLC14A1	green	0.397585578	-0.567597461	-0.283451578	-0.429536545	-0.274299318	0.252688408	0.07034377
LY86	turquoise	-0.652853853	-0.367334563	-0.160980671	0.012874749	-0.105480607	0.869221583	0.310448245
SPIB	red	-0.246727306	0.441734497	0.17678888	-0.161205017	0.925566477	-0.542260814	0.245507516
S100A12	blue	-0.63617158	-0.031509923	-0.044683393	-0.08005391	-0.148343936	0.458181249	-0.005708908
ZBTB16	turquoise	0.31855241	0.158850753	-0.156830544	-0.097278833	-0.204921362	-0.132075303	0.080982641
JAKMIP2	blue	0.711399319	-0.397107321	0.003509959	0.499148041	-0.077462341	-0.200911127	0.060326666
SLC22A4	turquoise	-0.057591037	-0.61093501	-0.083126943	0.140067038	-0.521930139	0.865765803	-0.079181863
PNOC	red	-0.268128354	0.511837599	0.329691386	0.246576582	0.8672761	-0.334359259	0.121533333
MICA	green	-0.029314238	0.03303103	-0.645616323	0.147846193	-0.083443519	-0.306282171	-0.125937957
VNN2	turquoise	0.01176103	-0.395296477	-0.032381265	-0.159198415	-0.267826413	0.621847715	0.210638056
GPA33	brown	-0.058016323	0.907128701	0.524012417	-0.162212566	0.581768638	-0.617007289	-0.256065429
HK3	turquoise	-0.342495342	-0.431737211	-0.284920344	0.07840534	-0.611016061	0.899504655	-0.075357712
IL6R	turquoise	-0.598907978	-0.300362425	-0.27600609	-0.141795934	-0.226350798	0.771397152	0.136580959
BATF	blue	0.495376843	-0.191832499	0.191556086	0.191958764	0.114959551	-0.252774062	-0.168749439
ING2	green	-0.090507915	0.353221466	0.755758049	0.041060228	-0.101950695	0.112454952	-0.335183975
AATK	brown	-0.228052422	-0.450508045	-0.495006551	-0.199181717	-0.002610897	0.319397919	0.420716902
IL15	turquoise	-0.287637466	-0.583349489	0.091639975	0.122753419	-0.490743249	0.925793187	0.182481184
ADAM28	red	-0.013486614	0.381489621	0.33147352	0.283716551	0.759114797	-0.533324997	0.303805568
CASP1	turquoise	-0.348808043	-0.493654609	-0.189268072	0.156204015	-0.447842278	0.95899302	-0.040870173
TNFAIP6	turquoise	-0.115589872	-0.757858778	-0.249825825	-0.157920943	-0.290317533	0.775200767	0.37100687
RAB33A	turquoise	0.381195634	0.258083752	-0.136869692	-0.188428953	0.343540281	-0.611263548	-0.100124397
SELP	yellow	-0.321567384	-0.337222943	0.071035641	-0.120001526	0.198601636	0.206933021	0.962679325
SNRPA1	yellow	0.416050392	0.162462474	0.3775737	0.226916299	-0.083422246	-0.267036809	-0.493697812
PTPN22	blue	0.824787724	-0.302354093	0.177357428	0.008684541	-0.104817591	-0.316414732	0.073379599
RAD51C	brown	-0.105457484	0.717425322	0.580202598	0.115489549	0.685572606	-0.487045579	-0.240483457
COLQ	blue	0.576072157	-0.412170038	-0.349038521	0.170265838	-0.34417086	-0.026047001	-0.015879613
HCP5	brown	0.103107449	0.540352186	-0.059685733	0.615418535	0.408636208	-0.409590228	-0.490521376
PRKCH	blue	0.748664981	0.22678219	0.551351963	0.467689618	0.059296986	-0.456240733	-0.227303316
CPM	turquoise	0.105840131	-0.480423912	-0.528200499	0.124791816	-0.157317694	0.527106705	0.028758865
SRSF6	green	-0.264251205	0.406822482	0.69438148	-0.174695594	0.357117586	0.025393335	-0.021223537
RNASE2	turquoise	-0.236576947	-0.334372561	0.221548184	0.433120627	0.010182217	0.65071797	0.101200611
EPHA4	turquoise	0.298784836	0.00479639	-0.362426328	-0.286738555	-0.063009508	-0.449486734	0.099238395
STAT4	blue	0.782237871	0.237180821	0.354427958	0.399788193	0.198044544	-0.479353586	-0.27398311
CD33	turquoise	-0.482839725	-0.567129648	-0.286070782	-0.164782008	-0.511417176	0.9555431	0.131643636
CXCR5	red	0.078828824	0.456550858	0.384895865	0.256516733	0.886018509	-0.481831291	0.06696857
ASGR2	turquoise	0.02126366	-0.625997942	-0.121294383	-0.139110937	-0.799796729	0.822911667	0.093152438
XAF1	turquoise	-0.349263315	-0.624387293	0.060445313	-0.018878558	-0.390960847	0.854131938	0.191846785
IL3RA	blue	-0.427729834	0.283451964	0.162609458	-0.368210123	0.080106216	0.082273597	0.082433483
CD27	brown	-0.200043164	0.964144304	0.296305449	0.049398226	0.668717968	-0.657174881	-0.374921788
PTX3	turquoise	-0.365442301	-0.485413678	0.24983792	0.035562342	-0.127301527	0.5709773	0.279957917
ARHGAP6	yellow	-0.200730422	-0.478530072	-0.133369308	-0.256085717	0.011553344	0.196628587	0.96062872
ADRB2	blue	0.843017103	-0.34401654	-0.01137625	0.136200668	-0.30938812	-0.049369536	-0.203563974
HOXC4	blue	0.628311395	0.309601978	0.358031074	-0.000381676	0.217066879	-0.416476806	-0.584205708
CLC	brown	-0.290884169	0.532936109	0.280953909	0.076852719	-0.044615182	-0.299165494	-0.211204478
PLA2G7	turquoise	-0.353151608	-0.37280559	-0.05570921	0.445738881	-0.312719349	0.766572025	-0.025446375
TNFRSF10C	turquoise	0.069833477	-0.65335635	-0.093840164	0.187057061	-0.202800956	0.594792046	0.282282566
NRG1	blue	-0.566924223	-0.27687998	-0.165168969	0.23194991	0.224574898	0.397501023	0.329019103
MICB	brown	0.221017137	-0.886164764	-0.39269463	-0.13928962	-0.7497671	0.574662245	0.224053859
EGF	yellow	-0.395236073	-0.191112027	-0.27928604	-0.377663255	-0.015261054	0.05208128	0.801883012
BLK	red	0.038891209	0.330270207	0.292155952	0.049887893	0.838094659	-0.570209734	0.169902952
MATK	blue	0.87374662	-0.085266684	0.081602026	0.101216322	-0.189039459	-0.545329813	-0.117784582
PTAFR	turquoise	-0.348841996	-0.633953665	-0.272674399	-0.148065051	-0.506398549	0.929991005	0.229384014
PRKY	blue	0.402309166	-0.030698342	-0.269897462	0.236946762	-0.308560256	-0.148667568	-0.239393786
IL18	turquoise	-0.285577772	-0.587367556	0.003231469	-0.119796409	-0.507776422	0.897019113	0.303938542
SPINK2	green	-0.322848998	0.553587762	0.342491093	0.158611068	0.33187215	-0.148381629	-0.212020976
OPHN1	yellow	-0.130020363	-0.060050899	-0.502147671	0.073533387	0.021876848	-0.255928193	0.258261241
CCR7	brown	-0.274231349	0.885098174	0.057409789	-0.044265388	0.399328904	-0.347809811	-0.504278532
FOLR3	blue	-0.629920329	-0.145941925	0.062193431	0.152937731	0.217742717	0.449333045	0.142440241
CFP	turquoise	-0.525011132	-0.545118908	-0.353587649	-0.225419821	-0.467801296	0.916666354	0.236468674
G3BP2	turquoise	0.217082597	0.208259569	0.644096662	0.057006989	0.282471726	-0.513689926	0.232697337
ANK3	green	0.053328792	0.361356057	-0.066274484	-0.171667372	0.430535948	-0.244118212	0.190732004
PF4	yellow	-0.350415756	-0.203639131	-0.00161855	-0.015981158	0.260660519	-0.003732131	0.892723826
TNNI2	turquoise	-0.11460545	-0.22467502	-0.370793658	-0.073515652	-0.20695343	0.382124139	0.413758761
CD19	red	-0.208770136	0.633089269	0.374997328	0.135303677	0.971681503	-0.608995272	0.041589479
ASAP2	yellow	-0.342557652	-0.476428373	-0.025384716	-0.039246888	0.205013925	0.375759232	0.862478166
IGSF6	turquoise	-0.344085702	-0.61235914	-0.245599501	0.180559971	-0.492123259	0.944792715	0.005430169
PLXNC1	turquoise	-0.168507179	-0.535327817	-0.121655899	0.167488799	-0.342477013	0.829138898	0.321240121
FAM30A	red	-0.159638781	0.493108456	-0.036392209	-0.039367564	0.865153958	-0.489008307	-0.040001211
SUN1	yellow	-0.388423323	0.365692749	0.118073143	0.005979195	0.404582517	-0.264555321	0.495110638
CD36	turquoise	-0.688264563	-0.412650975	-0.136242008	0.009233719	-0.31762953	0.794585692	0.239697851
FHIT	green	0.041354882	0.505997646	0.68456904	0.178083516	0.426160082	-0.220893268	-0.088847606
ITGA2B	yellow	-0.19239057	-0.268812547	0.023169631	-0.190162425	0.212279253	0.010782932	0.957366292
AIM2	blue	-0.439056482	-0.269312088	0.051327755	0.057427131	0.023571156	0.385938592	-0.067423335
CYP4F3	turquoise	0.097677084	-0.698489314	-0.053677516	0.120876311	-0.285838616	0.584558635	0.320528684
RGS9	blue	0.804592064	-0.181347896	0.00538986	-0.062555464	-0.290161597	-0.483481869	-0.062217544
MGAM	brown	0.159489516	-0.683284211	-0.273407887	0.435990864	-0.45034769	0.596312373	0.096413439
CD28	turquoise	0.056603472	0.522552616	0.023182606	0.053829465	0.602988756	-0.638726728	0.054819949
GUSBP14	turquoise	-0.112086425	0.084768672	-0.435317759	-0.411881688	0.086020246	-0.17168039	-0.416901596
ADGRG1	blue	0.844164564	0.03160489	0.315299383	0.02947194	-0.281020771	-0.380164577	-0.291642945
LY96	turquoise	-0.29892676	-0.659363893	-0.093540138	0.027265682	-0.522073195	0.923604164	0.103676195
GFI1	blue	0.789951778	-0.00303494	0.395777108	0.241259349	-0.022437585	-0.372101929	-0.319200397
LIPC	blue	0.602550892	-0.018323749	-0.024783404	0.412674659	-0.219369809	-0.166933815	0.073568402
IL18R1	blue	0.264309648	-0.459866478	-0.258764675	0.137861942	-0.185512835	0.258417629	0.40352518
USP9Y	blue	0.365122541	-0.024844167	-0.318386664	0.302123398	-0.249896069	-0.134139167	-0.154459647
APOBEC3B	grey	0.018753539	-0.012447684	0.113793006	0.62677877	0.205888814	0.017937992	0.079157902
RASA2	brown	0.268121467	0.516917171	0.250452655	-0.027993369	0.351704884	-0.300884005	-0.270525892
P2RY14	turquoise	-0.017375918	-0.277154613	-0.533004228	-0.284618974	-0.08194975	0.342095453	0.222515872
TNFRSF17	red	-0.406105406	0.306450479	-0.148366734	0.236961997	0.768378035	-0.174766276	0.222264819
HAL	turquoise	-0.596647223	-0.376818246	-0.206534876	-0.015204213	-0.31669141	0.844895574	0.267712221
APMAP	blue	0.9347348	-0.378012868	0.026980509	0.183308573	-0.54680821	-0.092351296	-0.182452556
GZMK	red	-0.254383308	0.185521766	0.194933323	0.122171536	0.547533078	-0.257775211	0.06979545
FLT3	turquoise	-0.055672392	-0.518309944	-0.384005498	-0.448711242	-0.543708998	0.731237462	-0.074194349
CEACAM8	blue	-0.506240886	0.35090181	0.178531705	-0.051480242	0.171197337	0.043734757	0.286940864
CLEC10A	turquoise	0.086016379	-0.619309052	-0.133536962	-0.275870592	-0.760158014	0.678330819	0.166559506
PDK1	brown	-0.188214132	0.659505206	0.158431284	0.193690271	0.415321383	-0.229676928	-0.459342562
HP	green	-0.158057763	0.100232065	0.349743311	0.194467239	-0.102323472	0.304826094	0.021853893
XK	yellow	0.133309311	-0.375541381	0.012365898	-0.040947152	0.18008766	-0.074127951	0.822866969
KDM5D	blue	0.349826328	-0.035062052	-0.352829151	0.298719466	-0.24887741	-0.119057601	-0.147864105
EPB41L3	turquoise	-0.328619206	-0.437820939	-0.112583938	0.111488243	-0.39249773	0.883369826	0.16431907
TFEC	turquoise	-0.400319932	-0.389405861	0.122180364	-0.023278986	-0.183463714	0.869444684	0.054783975
FCER2	red	-0.517673789	0.695132967	0.235092083	0.131640913	0.878722357	-0.414953568	-0.026531691
KCNJ2	turquoise	-0.043300859	-0.679870235	-0.355310359	0.097403033	-0.420984193	0.866653074	0.113635556
CD3G	turquoise	0.498840406	0.488240055	0.340691648	-0.054352692	0.241821908	-0.759953644	-0.308369376
TXK	brown	0.064272801	0.579127378	-0.072099349	0.167387838	-0.088824973	-0.280965301	-0.36650228
HBD	red	0.259919554	-0.372286534	0.077216872	0.436470592	-0.561639184	0.16805215	0.040522971
RNASE3	grey	0.09119067	0.024938536	0.050097137	0.683962277	0.187444944	0.017235528	-0.003357578
FKBP1B	brown	0.265890214	-0.776317372	-0.369996249	-0.097578168	-0.10135632	0.178536379	0.556432001
ELANE	brown	-0.343717301	0.433545766	-0.068576872	-0.065368009	0.14613617	-0.119702891	0.040176799
MXD1	brown	0.177834303	-0.646615906	0.05280408	0.078313926	-0.674897916	0.568441471	-0.033177984
GP9	yellow	-0.339882672	-0.309878863	0.053340664	-0.169557464	0.156395123	0.133395618	0.884682685
GNG7	red	-0.180335442	0.382363215	0.424479549	0.206831139	0.807723638	-0.163776739	0.158991238
CRTAM	turquoise	0.006408177	0.554274869	0.409102741	0.304537662	0.392523173	-0.524045809	-0.495750307
UPF3A	blue	0.24296529	-0.154287556	-0.221555665	0.292918001	0.238184743	-0.136705248	-0.268836061
NAT8B	yellow	-0.427450028	-0.437297084	0.071702942	-0.272791563	0.024559174	0.34355417	0.557657355
CXCR6	green	-0.04118282	-0.019826549	-0.590744436	-0.511893489	0.130630553	-0.083428241	0.063577696
CCR2	turquoise	-0.210792441	-0.690699541	-0.354715208	-0.304778327	-0.232741692	0.715989301	0.421266593
FLT3LG	brown	-0.249130972	0.95463666	0.456265378	-0.010773705	0.660006234	-0.651719576	-0.308856383
CCR6	red	-0.312924511	0.142587099	0.018398696	-0.071707343	0.755295293	-0.278723822	0.352820161
CCR5	blue	0.136853855	-0.368028982	-0.230220276	-0.240423093	0.1898915	0.016358732	0.187060255
TSC22D3	turquoise	-0.523109931	0.03406412	-0.139273471	-0.334683326	-0.232147711	0.436362358	-0.233990087
PLAGL1	turquoise	-0.151975511	-0.769944754	-0.189939613	0.14026215	-0.521315386	0.877213746	0.001260533
CXCR2	turquoise	0.288979761	-0.746532219	-0.1803989	0.170819886	-0.483512633	0.661753214	0.046104198
KRT10	turquoise	0.360444275	0.173768687	0.265582179	0.348162469	0.396123547	-0.689623653	0.110469057
SLC16A6	turquoise	0.335763674	-0.454985098	-0.229733761	-0.052190336	-0.583048127	0.549637156	-0.173318623
ST13	brown	-0.139858894	0.90097945	0.436643717	-0.167752398	0.513144531	-0.539588154	-0.269875391
HDC	brown	-0.409575293	0.615744641	-0.001541805	0.129514226	0.004295144	0.009152406	-0.562344387
IL18RAP	blue	0.566955338	-0.186232845	-0.172922194	0.200401033	-0.364853489	0.032241924	0.09611511
NLRP3	turquoise	-0.069758238	-0.566579	0.143478833	0.07951674	-0.443948965	0.847877854	-0.043117427
CSF2RA	turquoise	-0.47788099	-0.35940544	-0.431948909	-0.108015715	-0.546560703	0.81696041	-0.113177148
CXCR1	turquoise	0.406395533	-0.709112154	-0.227246212	0.036027435	-0.450710733	0.581283073	-0.04873101
MFN1	red	-0.198459532	0.397951133	0.356489639	-0.082903822	0.554811636	-0.04477895	0.05259525
LILRB1	turquoise	-0.399333786	-0.493619294	-0.336285657	0.016477045	-0.437890289	0.91824467	-0.055027744
ADGRE1	turquoise	-0.441950274	0.12232236	-0.090201374	0.291838106	0.093540777	0.547683448	-0.313816464
TNF	green	0.32259867	0.552449165	0.820473942	0.125000889	0.430622205	-0.465114478	-0.160439468
SULT1A2	blue	-0.631967548	-0.482347178	-0.317904041	-0.064503588	-0.078752059	0.656677974	0.579364965
ICAM4	grey	0.368154076	-0.182966071	-0.040217614	0.748702667	-0.101232577	0.186571562	-0.248832734
ALOX12	yellow	-0.012235227	-0.321397443	-0.062988745	-0.114468062	0.162268056	-0.109466694	0.925574228
TNFSF8	blue	-0.601946645	0.201324891	0.150701455	-0.561472367	0.261518193	0.220043236	0.262343707
SIGLEC7	turquoise	0.007136616	-0.402978728	0.029968301	0.009311647	-0.664073368	0.6897964	0.099368075
KLRA1P	yellow	0.184760584	0.369458469	0.175478902	-0.085156703	-0.10194416	-0.454209013	-0.538311247
KCNA3	green	0.150948451	0.345958156	0.602044507	0.10388671	0.388110038	-0.430757601	0.056894936
DEFA4	blue	-0.435825959	0.403576447	0.192987214	0.084620986	0.117216842	0.073144816	0.156986466
ZNF45	green	0.330955523	0.373692306	0.264279188	0.020116036	0.410615976	-0.241274373	-0.256059042
CD226	blue	0.575844021	-0.346465746	-0.063534207	0.375900087	0.114178539	-0.183658441	0.456339843
ZNF200	green	0.169305559	0.121503861	-0.050758821	-0.27619326	0.277317315	-0.006477137	-0.101193536
SH2D2A	blue	0.742044832	-0.196912168	0.047779018	0.203826516	-0.215500431	-0.09756299	0.150993383
PGLYRP1	turquoise	-0.361982388	0.100465412	0.334994757	-0.134024251	-0.114632116	0.318143599	0.214970685
GK	turquoise	-0.214159368	-0.513988644	-0.137663526	0.011410385	-0.340212045	0.863355485	0.158538296
GP1BA	yellow	-0.372589194	-0.179214571	0.157369229	0.050241672	0.322201982	0.127801842	0.862325674
ZNF137P	yellow	0.01439507	0.21348498	-0.383710641	-0.152556074	-0.110268847	-0.293445924	-0.421701743
TNFSF4	yellow	-0.310997256	-0.376543756	0.026063812	-0.255679107	0.213338276	0.125944082	0.902720705
DEGS1	green	-0.111981603	-0.077836937	0.303757686	-0.24384446	0.09438947	0.037592197	0.100106843
GZMM	blue	0.927092279	0.031068676	0.169281045	0.20749728	-0.162185745	-0.418859137	-0.228235522
NGLY1	green	-0.184130463	-0.55995735	-0.803132521	-0.122662439	-0.458305101	0.385077809	0.067441335
CASP5	turquoise	-0.142091464	-0.207772129	-0.16058375	0.057490426	-0.455382478	0.554467271	-0.318095092
LAIR2	turquoise	0.505966233	-0.118720265	-0.086420202	0.015021493	-0.032892961	-0.541254004	0.061545069
TNFRSF9	blue	-0.450258092	0.171164371	0.198003162	0.2479552	0.481359778	-0.007136174	0.041493061
SYK	turquoise	-0.331039708	-0.437517452	0.183470679	0.314588129	-0.275458346	0.856557176	0.181957463
MPL	yellow	-0.281467678	-0.153583908	0.018161227	-0.09053121	0.293088106	-0.131112302	0.921858814
THEMIS2	brown	0.363947774	-0.569738577	-0.443198732	0.025675667	-0.522488581	0.469815493	0.184308598
GADD45B	green	0.201393289	0.198890486	0.799571971	0.246388504	-0.182454292	0.059360885	-0.216472677
SULT1B1	blue	-0.467497971	0.236926984	0.509518547	-0.047566704	-0.00306553	0.43116623	-0.151212606
ARHGAP12	blue	0.594237602	0.280828316	0.387218053	-0.056527723	-0.026492843	-0.40003858	-0.527965216
ADGRE2	turquoise	-0.14779339	-0.506336457	-0.339368882	0.262883913	-0.618831542	0.843837857	-0.133463683
TNFRSF1A	turquoise	-0.105253456	-0.621044706	-0.213222426	-0.056672227	-0.454536339	0.899542329	0.093974155
GPR171	turquoise	0.01571685	0.624921732	0.200400541	-0.385490584	0.622517345	-0.600800763	0.112374139
CMKLR1	blue	0.474657389	-0.183502636	0.092833689	-0.082061114	-0.471496896	0.047952322	-0.289995391
BLNK	red	-0.329184791	0.469494608	0.13004284	0.019072217	0.954932549	-0.435878938	0.232719276
FCAR	turquoise	-0.422320794	-0.338815334	0.127032767	-0.026720088	-0.374490379	0.798977949	0.105205844
LILRB2	turquoise	-0.374457535	-0.51078669	-0.449152176	0.078019351	-0.49450393	0.896008694	0.088578229
NINL	turquoise	0.097020998	0.408918237	-0.014019273	0.638044307	0.455633706	-0.413875791	-0.08270693
KLRC3	yellow	0.06403825	0.507800071	0.376380743	0.048176973	0.243997191	-0.399524012	-0.608842265
SP140	red	0.078177836	0.061536908	0.136898608	-0.055406753	0.646249359	-0.440560447	0.158749953
CYP2R1	turquoise	0.620983105	0.364082488	-0.080625109	-0.005283027	0.186572433	-0.578240212	-0.153741693
KLRD1	blue	0.932065899	-0.153100888	0.025244851	0.118011226	-0.373948646	-0.283290351	-0.292719377
PROS1	yellow	-0.228176561	-0.113783364	-0.159184736	-0.253322191	0.274850619	-0.166877573	0.885937472
PF4V1	blue	-0.560140626	-0.029310308	-0.017829953	-0.102170385	0.101098951	0.237684003	0.247990396
ID3	green	-0.125469935	0.248659105	-0.572093282	-0.177276064	0.258147439	-0.159117969	-0.124526761
CD160	green	0.354531196	-0.111762308	0.2170612	0.319748983	-0.365077616	0.028217735	-0.343477815
LILRA2	turquoise	-0.240085482	-0.630247486	-0.361888032	-0.117882555	-0.523767159	0.902233809	-0.031480636
LILRA1	turquoise	-0.541076984	-0.481705965	-0.323439723	-0.069780089	-0.512657251	0.806023371	0.295250069
TNFSF14	brown	0.256409027	-0.753916251	-0.671014243	0.16685364	-0.412425293	0.471767424	0.088436313
CITED2	yellow	-0.281194439	0.554219743	0.544790435	-0.231492538	0.285113099	0.000363672	-0.386992592
HCK	turquoise	-0.433968252	-0.378366135	-0.266047555	0.071985075	-0.528752494	0.894253074	-0.121169214
CDC14B	yellow	-0.09783596	-0.265194373	-0.046870015	-0.309633545	0.189376964	-0.121407658	0.92075733
HERC4	turquoise	-0.278459796	-0.192011024	-0.59220722	-0.189147058	0.027051586	0.462353994	-0.117437059
CBFA2T3	turquoise	-0.339296157	-0.184175256	-0.214697194	0.290408067	-0.188215819	0.662269295	-0.043585369
UTY	grey	0.332595953	0.068132773	-0.13479164	0.333854722	-0.064848085	-0.273410068	-0.219565297
CYRIA	turquoise	-0.198388914	-0.441602831	-0.019816913	0.106780267	-0.44389116	0.923519774	-0.080094942
KIR2DS3	blue	0.39826429	0.304799274	0.187856733	-0.32775007	-0.110095793	-0.43380966	-0.045065767
TBXAS1	turquoise	-0.248136605	-0.616330233	-0.172268022	-0.177522066	-0.589946371	0.89243613	0.206557716
CPVL	turquoise	-0.260148411	-0.692435655	-0.460249012	-0.059722672	-0.583685178	0.885575954	0.132298462
DDX11	yellow	-0.672176181	-0.192518096	-0.516148288	-0.407179776	0.178690869	0.317634038	0.602177235
DDX17	blue	0.458918372	0.293958184	0.226878023	0.292036991	0.233845145	-0.101883915	-0.432199581
ABCC3	yellow	-0.310443826	-0.378168443	0.102497148	0.241089655	0.153974748	0.340582955	0.822661481
KIR2DL3	blue	0.600494682	0.051431266	0.345786935	-0.099671854	-0.394778723	-0.13765371	-0.301513813
H4C8	blue	-0.562561706	-0.072551805	0.087910763	0.200894482	0.380209848	0.125417724	0.171582948
KIR2DS1	blue	0.286810231	0.235865204	0.340746778	-0.282630089	-0.174874152	-0.238057685	-0.038869444
KIR2DS5	blue	0.516488871	0.189027006	0.147537725	-0.150490894	-0.251607597	-0.363483097	-0.152587128
APLP2	turquoise	-0.45170824	-0.596381897	-0.186148	-0.033047262	-0.541094879	0.946884079	0.214145161
RNPEP	turquoise	-0.215794742	-0.456900107	0.057420887	0.360352392	-0.490201731	0.832049849	-0.048055712
CCR3	turquoise	-0.316009524	-0.404984173	0.116072059	-0.109279607	-0.37733451	0.717097555	0.209542381
MEF2A	yellow	-0.154709789	-0.318932749	0.124746002	-0.252619938	-0.268933081	0.546708005	-0.227246492
GRAP2	yellow	-0.049927839	-0.006572588	0.234497685	0.043581936	0.565951691	-0.309914605	0.762129298
KIR2DL4	red	0.199023841	-0.138176692	0.240343291	0.326618692	-0.427005504	0.273006827	-0.13686842
IRF7	turquoise	-0.37937465	-0.46377763	-0.06797896	-0.241232119	-0.196914891	0.774246907	0.022031046
FGR	turquoise	-0.19594921	-0.347872645	-0.075076766	0.146084674	-0.540406687	0.847587944	-0.350805819
PRPS1	green	0.391516849	0.314440316	0.491956275	0.134697953	0.353697708	-0.498805093	0.206517297
LGALS2	yellow	-0.495129778	0.660567516	0.064741229	0.168151334	0.184422128	-0.077112727	-0.401026316
RRAS2	turquoise	0.552628885	0.432705583	0.438882859	0.494531283	0.345569439	-0.597111734	-0.143093592
H2BC9	yellow	-0.593314917	0.091871347	-0.042981785	0.053282473	0.449449383	0.061413896	0.541737087
H2BS1	yellow	-0.501808164	-0.141967443	0.108958884	0.117423687	0.449683891	0.170254944	0.862537294
PDE3B	brown	0.109207599	0.877945191	0.545259019	-0.150300873	0.497423443	-0.603586057	-0.536092159
LILRA6	turquoise	-0.425986525	-0.337917539	-0.24148427	-0.098831201	-0.523910554	0.902600014	-0.126172939
TUBB1	yellow	-0.334910709	-0.298809516	-0.127955173	-0.131531561	0.249742115	0.119946601	0.962512145
PDIA3	blue	0.604695821	-0.369497418	0.222163954	0.492285565	-0.348051791	-0.08178777	0.018959873
EZR	turquoise	0.195383571	0.254038558	0.381271966	-0.033888387	0.118032765	-0.548562877	-0.178744792
CD24	red	-0.14614819	0.549055363	0.380780255	-0.038796662	0.855763292	-0.473742234	0.098741108
PDLIM1	yellow	-0.418195673	-0.006061534	0.194305185	0.021016561	0.608871092	-0.175081848	0.795233243
TKT	turquoise	-0.364669295	-0.442848207	-0.208404127	-0.103067591	-0.583364612	0.845837498	0.109244284
CDC42	blue	-0.099725765	-0.023819981	0.02983059	-0.30919819	0.232010898	-0.146145582	-0.109061015
LTA4H	blue	-0.538031416	0.429356289	0.092814052	-0.10698609	0.240097826	0.171389748	0.020040127
FSTL1	yellow	-0.4958091	0.064570324	-0.128481464	-0.29202036	0.303409446	-0.121620642	0.665071204
GOLGA8A	turquoise	0.241791034	0.597630382	-0.024408886	0.206269905	0.210247166	-0.711069145	-0.357797287
PLXNB2	turquoise	-0.552232543	-0.385568776	-0.23213899	-0.106540622	-0.492909843	0.913382237	-0.012053258
DUSP6	turquoise	-0.327531086	-0.537970557	-0.317960836	0.115773915	-0.409564184	0.864524778	-0.055421921
HLA-DRA	turquoise	-0.288142477	-0.440715934	-0.111047024	0.2184127	-0.545196259	0.724672034	0.01308144
SRI	turquoise	-0.097793238	-0.181547831	0.005594072	0.161978267	-0.351496993	0.342872916	-0.055787766
CYFIP1	turquoise	-0.363310617	-0.687099804	-0.32226388	-0.138312008	-0.611105468	0.933089207	0.15625754
RNF11	yellow	0.174410777	-0.469725344	0.065240588	0.081950963	0.050708492	0.025107378	0.869899205
ID1	green	-0.367905457	-0.216814773	0.465943945	0.161010163	-0.153559192	0.439762543	-0.07453014
OSER1	brown	0.348484346	0.424192707	0.817707052	0.050530607	0.160570939	-0.378046256	-0.202430475
RALGDS	blue	0.931507996	-0.238722382	0.005535504	0.052405695	-0.269956467	-0.362241666	-0.009378117
CDC5L	yellow	0.170151176	0.079356003	0.43462945	-0.121791239	-0.189012657	0.238680001	-0.419382627
COL18A1	green	-0.095943694	0.240172893	-0.416682963	-0.51837281	-0.102245909	-0.171889552	-0.232633641
QDPR	green	-0.113506725	0.178815854	0.480179477	-0.549195591	-0.067588073	0.022232265	-0.173410857
IGLC1	red	-0.281225917	0.25685872	-0.09286498	0.238282337	0.76004411	-0.346536249	0.387787856
UBE2G1	blue	0.590324423	-0.048726874	-0.190900842	-0.141336602	-0.106774881	-0.241107633	0.032799655
MSMO1	turquoise	0.647599939	0.318040522	0.051021989	0.096442138	0.357928322	-0.693236358	-0.447036387
COL6A2	yellow	0.409138296	0.228487429	0.046149204	-0.325619683	-0.023215841	-0.274072562	-0.535510869
AKR1C3	blue	0.607990469	-0.059770223	-0.341671028	-0.08453921	-0.545421974	-0.06360634	-0.157031777
MBOAT7	turquoise	-0.033006458	-0.774094202	-0.111105852	0.144951743	-0.56764238	0.913363483	0.110343839
IRS2	turquoise	-0.690490549	-0.114712079	-0.069282672	-0.300975885	-0.150397241	0.647314111	0.174016673
FOS	turquoise	-0.324780921	-0.329614677	0.216069568	0.17093398	-0.147461884	0.771581863	-0.126916098
TUBB6	turquoise	-0.00207506	-0.517937243	-0.347528416	-0.317770337	-0.180327763	0.485797901	0.465767545
SYT11	blue	0.903182995	-0.375304394	-0.081138423	0.114229806	-0.39896762	-0.29928421	-0.175013257
CXCR4	brown	-0.193660735	0.536070414	0.595972012	-0.259176136	0.567524937	-0.37365965	-0.141891133
STX3	turquoise	0.004974537	-0.627428862	-0.212541932	0.157481965	-0.494169196	0.86380939	-0.068662915
CA2	brown	-0.232959264	-0.471084801	-0.366385731	-0.432305606	-0.077899842	0.254978053	0.524397226
SWAP70	red	-0.302580037	0.437366828	0.319899357	0.404701133	0.89075831	-0.374685901	0.152273367
UAP1	blue	0.804705641	0.256984606	0.490849614	0.219413196	0.021033619	-0.482545121	-0.357037361
EPHX2	brown	-0.143943518	0.899782386	0.123947694	-0.28632624	0.44898887	-0.567264038	-0.518195634
ANXA3	turquoise	-0.30362124	-0.121662043	0.452352246	-0.095473005	-0.180494073	0.496132773	-0.102948588
IGHM	red	-0.366880034	0.599496955	0.256969948	0.398860494	0.848666457	-0.448342079	0.017795326
DDIT3	green	0.096948868	-0.080292359	0.646801587	0.09536066	0.005622357	-0.154522239	0.203281237
CHI3L1	turquoise	0.036583666	-0.224631163	0.17104419	0.345451953	-0.066507482	0.452107836	0.079929476
H1-2	blue	-0.332871564	-0.116121697	0.127827384	-0.03411225	-0.104813335	0.204299845	0.180524252
BAG2	turquoise	0.590631382	0.620392012	0.30138972	0.021008881	0.380666732	-0.709922672	-0.397054524
IFI35	turquoise	-0.282755043	-0.525748803	0.230373403	0.033737508	-0.314914377	0.827727952	0.14874245
MSH2	brown	0.126034812	0.659077747	0.543222137	-0.148171765	0.352237359	-0.610081248	-0.153052901
PPAT	brown	0.150859073	0.467549735	0.17337873	0.259017783	0.287088453	-0.335907167	-0.387631737
SYNE1	blue	0.871937974	0.056340566	0.287007107	0.046784323	0.027875368	-0.588982679	-0.259480643
DUSP5	green	0.229990112	-0.007819675	0.750095576	0.470116908	0.043845579	0.059542064	-0.015394402
HLA-DQB1	turquoise	0.026119819	-0.016240874	0.108628598	-0.345398547	0.102152893	-0.194349111	0.288731984
PLEKHB1	brown	-0.022960809	0.950683419	0.525005894	0.082288224	0.437778303	-0.616027765	-0.434032566
HIP1R	brown	-0.070743719	0.779995036	0.255564284	0.132379235	0.758424363	-0.612105282	-0.146043999
RNF113A	turquoise	0.201131202	0.744204345	0.474350701	0.06476498	0.661229481	-0.782936309	-0.166220271
RGL1	turquoise	-0.280351058	-0.41385923	-0.046395255	-0.286552767	-0.606594401	0.665142216	-0.067893612
NSG1	turquoise	0.291762952	0.06384811	-0.050902287	0.040679829	0.287885508	-0.278780604	-0.152467926
PLAAT3	turquoise	0.445599779	-0.103589274	0.234380035	0.093413104	0.101281834	-0.320788755	0.113198099
CD200	red	-0.41497087	0.405688524	0.263697123	0.24996895	0.702138772	-0.214336639	0.318168824
MINPP1	brown	0.473802452	-0.419049613	-0.3265752	-0.202823208	-0.179948737	0.265539327	-0.034371119
TOR1B	turquoise	0.187232797	-0.719536782	-0.119991198	0.191504237	-0.323514879	0.6468945	0.131567731
CES1	yellow	0.431047533	-0.328694381	0.108773831	-0.008075403	-0.147416572	-0.110049929	0.393792468
HSF2	brown	0.175771318	0.857591835	0.364824593	0.16281277	0.614606102	-0.666776816	-0.468077123
TRAC	turquoise	0.310181449	0.475582474	0.208082553	-0.209312726	0.44139135	-0.838580303	-0.105078013
SMAGP	turquoise	0.396815397	0.324554345	0.497216479	0.518810375	0.33769953	-0.502064235	-0.493073578
RIN2	turquoise	-0.16669552	-0.71959065	-0.313552765	-0.109492121	-0.577910443	0.930260119	0.238796423
SLC35D1	turquoise	0.581561811	0.597350145	0.213341034	0.054546409	0.279803959	-0.635568743	-0.430227838
HLA-DRB4	turquoise	0.342806563	-0.660543885	-0.326340315	0.160522522	-0.412123487	0.361467529	-0.091643458
SCAPER	yellow	0.308912179	-0.007951011	-0.191742807	-0.112531723	-0.148898967	-0.082661458	-0.409971865
ADAM19	red	-0.489323298	0.027596364	-0.061119289	0.254527395	0.734992383	-0.067669731	0.45994958
ERAP1	grey	0.301403809	-0.13540687	0.236523366	0.187073163	0.300051361	-0.071819906	0.208818113
CD69	green	-0.00320357	0.223600913	0.511675719	-0.109386594	0.22959795	-0.309595794	-0.148426814
H2BC12	yellow	-0.285036663	-0.24344932	0.228800471	0.226781376	0.314960048	0.157650276	0.880288401
LRRN3	brown	-0.049267402	0.869447791	0.158989617	0.031692319	0.374557455	-0.502091607	-0.365887091
BTN3A2	turquoise	0.436470522	0.175599256	0.113340337	-0.203711975	0.176459075	-0.458884226	-0.023311748
FRAT2	turquoise	0.03766097	-0.665393751	-0.24071008	-0.037536035	-0.511500903	0.812920543	0.0290013
APBA2	turquoise	0.359854597	0.696760299	0.050158663	-0.062075031	0.324695208	-0.794147475	-0.596890703
COLGALT2	blue	0.687394145	-0.361040131	-0.473702015	-0.04817777	-0.72045272	-0.009045453	-0.175185671
SEC31B	brown	-0.394734654	0.610131521	-0.224474961	0.115323621	0.665938867	-0.300567741	-0.073213256
C3AR1	turquoise	-0.168867075	-0.480812336	-0.226584318	-0.1099271	-0.621961141	0.802328849	-0.192189698
H2BC5	yellow	-0.470470373	-0.223860088	0.223298736	0.184490979	0.287452394	0.140551653	0.648319829
NFE2	turquoise	-0.441760647	-0.570343277	-0.130196776	0.067343416	-0.337426857	0.855527149	0.369976667
CD300A	blue	0.656707323	0.07137822	-0.418270106	0.280490704	-0.246621455	-0.217425005	-0.484819518
NCF2	turquoise	-0.415816951	-0.610645235	-0.390339254	-0.037043976	-0.590905604	0.945840319	0.114041162
ZNF268	turquoise	0.24647121	0.487809539	0.24946204	-0.004047214	0.684146531	-0.548174159	0.014226712
ABCB1	turquoise	0.605162858	0.338764913	0.382035932	0.401728727	0.319506419	-0.535363183	-0.350207281
TCL1A	red	-0.354162439	0.52879505	0.239339938	0.230198104	0.893847235	-0.356927519	0.262100501
CD247	blue	0.789992085	0.223664959	-0.111678669	0.165137662	-0.179559605	-0.482059666	-0.339224156
CTSZ	turquoise	-0.310330177	-0.367195232	-0.146888403	0.082776711	-0.385553665	0.863808937	-0.07464864
MARCHF2	yellow	-0.345136078	-0.468514296	-0.100751915	-0.17329664	0.074373261	0.311779852	0.883925186
MYL4	brown	0.046158435	-0.343884924	-0.113457911	-0.348072905	-0.217340804	0.099384685	0.241297976
IGFBP3	blue	0.433999313	-0.003571924	0.187519272	0.223031034	-0.122673407	-0.185292608	-0.08097471
INVS	yellow	0.453552559	0.176649443	-0.226991975	0.108634253	0.091424431	-0.327565496	-0.637058718
SH2D1A	turquoise	0.617245089	0.235094587	-0.07999273	0.065562725	0.141140038	-0.620003614	-0.448402905
KCNJ15	turquoise	0.018980862	-0.744629752	-0.098424318	0.097596443	-0.382451418	0.829320302	0.197644701
CST7	blue	0.970463999	-0.0299765	0.148590438	0.220642301	-0.248593218	-0.476425156	-0.301379244
PLA2G4A	turquoise	0.011352385	-0.721233224	-0.112226728	0.060652592	-0.416757207	0.805800479	0.195113234
GZMB	blue	0.716237028	-0.096366566	-0.214179563	-0.066801074	-0.556913371	-0.090931797	-0.249087604
TLR5	turquoise	-0.315377467	-0.628379337	-0.102408251	-0.169308805	-0.466101622	0.92958524	0.187041728
SEC14L5	yellow	-0.00897589	-0.298314705	0.313145392	-0.219058152	0.199356661	-0.0827124	0.81937015
TLR1	turquoise	-0.148113413	-0.361857869	-0.018724507	0.206550999	-0.1377317	0.78230643	0.053741203
STX11	turquoise	-0.159335101	-0.172424474	0.210842355	0.217169841	-0.270121495	0.706956235	-0.06293567
FZD2	turquoise	-0.132495404	-0.664559452	-0.205755486	-0.197318221	-0.421699838	0.840968143	0.018628602
LILRB3	turquoise	-0.435027059	-0.453495191	-0.123801505	0.021742138	-0.423019939	0.970308705	0.039046434
CAMP	brown	-0.619812889	0.324646544	0.474708565	-0.061523721	0.276707858	0.092837746	0.342945992
GPR18	turquoise	0.28788683	0.440557475	-0.040922586	0.07615162	0.503749433	-0.523809165	-0.39218205
KLRG1	blue	0.610262827	-0.187134478	-0.162147353	-0.293373452	-0.023296572	-0.435129088	-0.149138396
LILRA4	green	-0.16750217	0.074553821	-0.452524792	-0.698809764	-0.075783908	0.051888279	0.041185165
TNFSF13	turquoise	-0.382973336	-0.219683155	-0.037209321	-0.222571185	-0.565928162	0.647311584	-0.050393901
GZMH	blue	0.90445621	-0.08378089	0.105327412	0.086698099	-0.210473428	-0.426727052	-0.361523708
BCL11A	red	-0.42280524	0.268779249	0.138892027	-0.192971302	0.722617114	-0.066225325	0.277586623
CAMK4	brown	0.050879533	0.915786618	0.447976162	0.03193655	0.626357058	-0.703355904	-0.368555887
IFNG	blue	0.727213297	-0.109883814	0.42304778	0.154777276	-0.250100941	-0.260103925	-0.437863961
MS4A1	red	-0.174453051	0.614600808	0.445377548	0.228079564	0.907639451	-0.587043264	0.030818196
RORA	blue	0.831657161	0.053604973	0.335950582	0.244974507	0.153017453	-0.61686115	-0.093827708
SCN3A	turquoise	0.364126755	0.196317935	0.00349439	0.567204453	0.474441947	-0.37302195	0.041504334
ICOS	red	-0.136513093	0.764942607	0.48861271	-0.132812331	0.776608038	-0.525729761	-0.049603206
P2RX5	red	-0.340716024	0.499418035	0.353213954	0.172056491	0.871105176	-0.412185966	0.03367594
VEGFA	turquoise	-0.37013067	-0.671647963	-0.044680566	-0.136219725	-0.442726081	0.837763721	0.158797708
BIRC3	red	-0.235478457	0.038309213	-0.293078192	0.297267885	0.499086767	0.037909374	0.175809767
SIGLEC9	turquoise	-0.446065414	-0.47772399	-0.364965542	0.013201803	-0.353407206	0.850583721	0.349345401
TP53I3	turquoise	-0.612146253	-0.265550834	0.018979867	-0.239580367	-0.045594614	0.650534461	0.245154268
LST1	turquoise	-0.420619804	-0.427147543	-0.385935346	-0.001210025	-0.569668382	0.846350751	-0.000226821
KLRC4	turquoise	0.61273286	-0.000394241	0.00455327	-0.279261099	-0.27196118	-0.530798579	-0.119534744
ADGRE3	turquoise	-0.203986017	-0.306070497	-0.006815625	0.198359287	-0.165315687	0.534241909	0.147053946
NCR3	turquoise	0.467705699	0.400929242	0.393908551	-0.096061255	-0.002471801	-0.572931777	-0.098913153
FPR2	turquoise	-0.13561528	-0.623909065	-0.10137253	-0.038536084	-0.42680093	0.918614395	0.107913695
NCOA4	turquoise	-0.148636388	-0.701034927	-0.332249179	-0.177325355	-0.252316583	0.69363618	0.578240917
PLAUR	turquoise	-0.446947756	-0.433656861	0.073834615	0.168121252	-0.276344554	0.874382573	0.204130918
TNFRSF25	turquoise	-0.162679704	0.614948439	-0.014392763	-0.198071782	0.749377756	-0.67490748	0.250343506
FASLG	blue	0.728211188	-0.379232487	-0.070871582	0.249788568	-0.418230458	0.081416513	-0.05912242
FCGR2B	turquoise	-0.042524774	-0.416645489	0.116360977	-0.240719117	0.181154301	0.386069125	0.443601671
KIR2DL1	blue	0.472463915	0.271027571	0.349167855	-0.023001231	-0.39317022	-0.189636377	-0.397037613
POMZP3	yellow	0.294924343	-0.11818534	0.153526812	0.342936032	-0.230814207	0.289030539	-0.502492569
TRBC1	turquoise	0.125656427	0.655759525	0.310549469	-0.149158861	0.465341521	-0.877407899	-0.149060473
ST3GAL6	turquoise	-0.137453055	-0.826381107	-0.252824964	-0.041570835	-0.558909373	0.859113911	0.141623815
LEF1	brown	-0.19482621	0.930370233	0.271993691	-0.092210351	0.440606786	-0.476154682	-0.392440502
FCGR2C	turquoise	-0.109946447	-0.604879446	0.039259681	0.132288676	-0.390645684	0.919023857	0.107471196
MGLL	yellow	-0.226097774	-0.357970302	-0.156626488	-0.151780995	0.197775357	0.092567531	0.920860816
MLLT11	turquoise	0.572240817	0.212443771	0.143572469	0.322177016	0.338898367	-0.635326173	-0.164830731
ACSL6	red	-0.073498921	0.71601123	0.430295401	-0.001962375	0.748971243	-0.650851087	-0.048543449
KIR3DS1	blue	0.210911044	0.135872681	0.161437038	-0.235697358	-0.346333283	-0.295214652	-0.210341354
KIR2DL2	blue	0.554445001	0.100369244	0.357323447	-0.072153036	-0.389369062	-0.222991795	-0.239224647
KIR2DL5A	blue	0.565214109	0.187960516	0.404062147	-0.085087953	-0.296203975	-0.307366538	-0.298977516
KIR2DS2	blue	0.364355611	0.25229068	0.351857795	-0.255361233	-0.111052677	-0.286353039	-0.03848387
ALAS2	brown	0.327330491	-0.352821113	0.199881909	0.718243124	-0.181216951	0.133883346	0.052420682
FBL	turquoise	0.225835769	0.806228081	0.204186471	-0.08371423	0.370864621	-0.818982734	-0.376538514
IGHG1	red	-0.423069271	0.623569665	0.280283358	-0.046282387	0.8940446	-0.384582688	-0.083251131
PTGDS	blue	0.536593634	-0.311086567	-0.130193946	0.015161444	-0.374739169	0.157066815	0.162121418
KIR3DL1	blue	0.482809256	0.088516664	0.183246215	-0.188413832	-0.274077393	-0.163043774	-0.147502344
UBE2D1	turquoise	-0.192942384	-0.669840998	0.05163811	0.025108871	-0.505877466	0.875949393	0.207603445
IGLJ3	red	-0.407579338	0.630723508	0.182700765	0.049607546	0.868721461	-0.458907396	0.073229343
IGK	red	-0.376553387	0.692855135	0.370517797	0.021496031	0.85727709	-0.505686261	0.119964082
HNRNPA3	green	0.130437192	-0.122448118	-0.837839092	-0.429184827	-0.214493543	-0.116458324	-0.076693232
HSPA5	green	0.532098553	-0.003827075	0.745723488	0.135308341	0.063770159	-0.180402461	-0.010395941
SMARCE1	blue	0.433821427	0.266494358	0.477502936	-0.282286167	0.127968639	-0.263219412	-0.381958521
HLA-DPA1	turquoise	-0.434458811	-0.093527756	0.423471675	-0.064335773	-0.137112163	0.344022054	0.19627433
TPGS2	turquoise	0.031182299	0.457784704	-0.200521536	-0.230597732	-0.045437904	-0.36138258	-0.19329782
ATP9A	yellow	-0.251128478	-0.159927609	0.100610121	-0.082895842	0.36835553	0.208883959	0.761391358
ZMIZ1	brown	-0.112325417	-0.797505363	-0.224367719	-0.091122682	-0.711664214	0.814841992	0.107983438
MT2A	yellow	0.070180987	0.245550891	0.46176735	0.184744366	-0.027587816	-0.042975843	-0.457943315
KCTD12	turquoise	-0.325164953	-0.495495485	0.039105732	-0.286108336	-0.490267891	0.911181765	0.074732965
SERPINE2	turquoise	-0.091685727	0.030236287	0.116090999	0.175505452	-0.315583159	0.23301345	0.156345274
IFITM3	turquoise	-0.14781318	-0.651691548	0.02276661	-0.037206644	-0.520707527	0.836834588	0.110884128
ALDH1A1	turquoise	-0.354056327	-0.585616464	-0.677229666	-0.052516024	-0.47207058	0.735547156	0.163563303
TUBA4A	yellow	-0.218557928	0.189954028	-0.274127396	-0.210433949	0.645046868	-0.408761431	0.528418867
SERPINB1	turquoise	-0.126991016	-0.411229394	-0.108515424	0.135488979	-0.300205393	0.723025988	-0.032708729
SEL1L3	red	-0.12677754	0.577225052	0.373157377	0.036813942	0.928429461	-0.667484499	0.068423314
CHMP7	brown	-0.283868158	0.820619444	0.032791945	-0.170924356	0.58805503	-0.416693592	-0.274051408
RBL2	turquoise	0.614179433	0.250961335	0.536866732	0.117148133	0.009264311	-0.492009683	-0.168062917
FAM102A	brown	-0.266524763	0.922956855	0.070213293	0.023236286	0.516543031	-0.571516099	-0.385520411
ZCCHC24	brown	-0.166625286	-0.708732703	-0.686470373	-0.333674601	-0.573986664	0.702790428	0.343190855
KIAA0930	turquoise	-0.130362401	-0.552790642	-0.401963947	0.153465569	-0.43604259	0.777082613	-0.229963895
SUCLG2	green	0.049374558	0.80157464	0.661945966	0.160925766	0.647617204	-0.533555372	-0.204803263
CEBPB	turquoise	-0.246069143	-0.500576063	-0.239615136	0.148830351	-0.484665158	0.895558068	0.01487016
MXRA7	red	0.217415222	-0.195384776	0.039736233	-0.325314527	-0.412709339	0.073564164	-0.267979294
ARAP1	turquoise	0.099301944	-0.412677745	-0.30227447	0.241262679	-0.25468883	0.525963515	0.288838991
LCN2	brown	-0.517212822	0.219229971	0.466972938	0.116480018	0.277722137	0.093579335	0.480982271
DOCK9	brown	0.025693656	0.856313861	0.169934885	0.047492177	0.67009323	-0.862966779	-0.266187298
DENND5A	turquoise	-0.395962107	-0.185235124	-0.02852759	0.051691027	-0.212153355	0.84761721	-0.105401572
ENDOD1	yellow	0.26035922	-0.083342862	0.247509113	-0.292312392	0.067806962	-0.300366245	0.504586262
JCHAIN	red	-0.474396775	0.214947819	-0.160434859	0.30493868	0.576805761	0.057565511	0.180250486
AUTS2	blue	0.578253801	-0.281451771	-0.043735596	-0.318559863	0.05468347	-0.312805579	0.066763395
RCOR1	turquoise	-0.123654239	-0.617724827	-0.474515847	-0.077478833	-0.383944327	0.807479692	0.040425881
CHN1	green	0.090847208	-0.23974952	-0.060228041	0.526783691	0.137293529	-0.184306613	0.196428745
HIVEP2	brown	0.162936131	0.760273141	0.24134096	0.080569324	0.49057132	-0.451749137	-0.445535627
RHOBTB1	yellow	-0.133191952	-0.454187103	-0.040132067	-0.047160189	0.083199914	0.146652282	0.912266895
IL1RN	turquoise	-0.224486735	-0.737500396	-0.006467615	0.09940763	-0.492488924	0.935486169	0.257406643
LHFPL2	brown	-0.312157169	-0.60165142	-0.014380897	-0.255429736	0.068514484	0.451656041	0.518479512
TIPARP	green	0.351624785	0.034076156	0.763923712	-0.052892474	-0.035578309	-0.119443545	-0.108399958
DDHD2	turquoise	0.595075551	0.406085842	0.302579181	-0.0692718	0.28117575	-0.837562246	-0.214794212
LRBA	turquoise	0.208393325	0.114062219	0.427299325	-0.103857581	0.585276034	-0.600732818	0.408964624
SYNM	yellow	0.146288829	-0.321132768	0.031011622	0.215882503	0.115261042	0.17582817	0.597657935
ANKRD46	green	0.280934952	-0.097773886	-0.413807265	-0.100124571	0.05851283	0.07467569	0.101463115
NME4	brown	-0.036338529	0.70667189	0.360273483	-0.211700282	0.286500718	-0.242477843	-0.273661594
TCF7L2	turquoise	-0.4300568	0.134552303	-0.092407715	0.372611799	-0.278108587	0.461932111	-0.276434993
OLFM4	blue	-0.747736083	0.332155325	0.439657045	0.060632054	0.38938597	0.222287255	0.255750924
FAM171A1	brown	0.078333597	0.724811112	0.173454693	-0.184763742	0.526932429	-0.731212124	-0.21057218
JAM3	yellow	-0.569739936	-0.258718816	-0.178681968	-0.061033256	0.196025756	0.234791149	0.904794085
DMXL2	turquoise	-0.256114005	-0.630076221	-0.170259768	-0.067673179	-0.58876969	0.974240408	-0.00692704
MEGF9	turquoise	-0.388250932	-0.501794079	-0.120236163	-0.064612785	-0.255134774	0.898385461	0.191778674
PPFIBP2	grey	-0.196767715	0.14977086	-0.09571848	0.126740599	0.270509088	0.203904813	0.25865005
SAMD4A	turquoise	-0.37677092	-0.698728189	-0.144935861	0.138211821	-0.474185554	0.896681453	0.331300885
MT1E	yellow	0.365865429	0.053071346	0.047497026	0.258642296	-0.079657514	-0.326255135	-0.350328506
SLC30A1	turquoise	-0.187754669	-0.546399725	-0.271148539	-0.150481446	-0.17676961	0.75372166	0.315805537
UBXN2B	brown	0.084899001	-0.6737212	-0.161832317	0.099065391	-0.441421973	0.58713151	0.175229352
TBC1D9	turquoise	-0.455558047	-0.321388547	-0.206909025	-0.349709849	-0.006080636	0.596584621	0.324547844
GNPTAB	blue	0.780956143	0.016168629	0.041517318	0.176255571	-0.529119771	-0.174990317	-0.620026368
NACC2	turquoise	0.203834766	-0.800615688	-0.452423791	0.082080257	-0.766522103	0.773028593	-0.037662631
KANK1	brown	-0.152812545	0.410054016	0.256032409	0.166419078	0.255341497	-0.136697061	-0.221142131
NEDD4	turquoise	0.095485336	-0.350487898	-0.128462747	0.179973581	-0.316158507	0.628988053	0.081724215
FRMD4B	brown	-0.126677228	-0.816339503	-0.359035978	-0.222712992	-0.306456929	0.653116623	0.639910886
CHI3L2	green	-0.290482654	0.599224666	0.605282954	0.517298704	0.543399372	-0.088964871	-0.24177209
GSAP	blue	0.766195157	-0.308654093	-0.069271011	0.440488947	-0.545851759	0.047610763	-0.33728234
CDKN1C	turquoise	-0.211127587	0.258829783	-0.245594872	0.322551176	-0.124795618	0.127293573	-0.323436821
TNNT1	turquoise	-0.253059526	-0.617440962	0.12193433	-0.126664212	-0.204145632	0.762964683	0.39402919
KNOP1	brown	-0.413165739	0.591600275	-0.004607583	-0.24335542	0.00327627	-0.065531352	-0.592552125
MARCHF3	red	-0.401815303	0.587582576	0.401514893	-0.080580584	0.860354368	-0.302663303	-0.010666365
RAP1GAP2	blue	0.688285399	-0.323033024	-0.413846411	0.275998273	-0.429407244	-0.065182874	-0.369244785
TRIM22	turquoise	-0.158353464	-0.407812886	0.292165848	0.028826643	-0.076976975	0.74024473	0.11618569
TOGARAM1	yellow	-0.086659707	-0.080393089	-0.313115978	0.130913629	0.341495839	-0.156763972	0.517684402
TMEM158	yellow	-0.129454683	-0.256225317	0.098554107	0.521489883	0.352944815	0.06007743	0.734698816
FEM1C	brown	0.330806958	-0.445134558	-0.548686221	0.119322198	-0.217824744	0.302516416	0.200264652
COQ2	turquoise	-0.099615102	-0.327857839	0.157067162	0.061742646	-0.331600898	0.817324251	-0.013618851
MLC1	blue	0.645053738	-0.102680169	-0.176180647	0.330061886	-0.481697311	-0.051756572	-0.390052791
CLIC2	brown	-0.076290215	-0.811291708	-0.358671357	0.032958549	-0.674569121	0.887252978	0.208083094
MFHAS1	turquoise	0.541123999	-0.107647074	-0.184997567	-0.267533069	0.042485085	-0.574429255	-0.001393074
GUSBP11	red	-0.171715631	0.340248353	-0.055897616	0.35792163	0.67390853	-0.347634865	0.248400652
G0S2	green	0.015587366	-0.378600621	0.526215856	0.256172655	-0.144948936	0.399410006	0.015875792
METTL18	turquoise	0.11566069	0.058792387	-0.117728127	0.05593456	0.449166676	-0.30997332	0.386222826
CD3D	turquoise	0.444670203	0.410045662	0.138187232	-0.140455572	0.403631789	-0.748445867	-0.28338825
RNASE6	turquoise	-0.299798584	-0.489580249	-0.138328229	-0.434167182	-0.300401313	0.80547145	0.238755954
ATP6V0E2	turquoise	0.264482931	0.756110648	0.225937138	-0.350126224	0.361440623	-0.80792993	-0.471629983
KIF3A	blue	0.289084642	-0.098843292	0.202914553	0.335892293	-0.302566989	-0.166090568	0.15705363
MT1F	yellow	0.299469586	0.209509221	0.302881516	0.005326115	-0.098699281	-0.188243394	-0.450888101
RSBN1	green	0.23872612	0.208865082	-0.457362176	-0.159118229	0.344562408	-0.350689444	0.018159349
SECTM1	turquoise	-0.272426748	-0.497344969	0.071851925	0.244809765	-0.486453316	0.900908375	0.017959976
MYO1F	brown	0.272214113	-0.910889554	-0.382985203	-0.021902902	-0.708247849	0.671259705	0.250755618
TRIM66	turquoise	-0.277420862	-0.236711319	-0.092153085	0.302936815	-0.32559687	0.699755513	-0.389203944
RSAD2	turquoise	-0.24385552	-0.694868406	0.090581993	-0.132345737	-0.341162096	0.783289892	0.298274057
ABHD5	turquoise	-0.064174632	-0.604638391	-0.364438857	-0.278827758	-0.269886279	0.649182851	0.242418512
CLMN	turquoise	-0.569291287	-0.581899435	-0.11530446	-0.046820948	-0.201807512	0.859279175	0.278866341
MYBL1	blue	0.862103903	-0.495877118	-0.12017374	0.181078389	-0.389433037	-0.04577399	0.078565623
NKG7	blue	0.9622251	-0.06464325	0.032334559	0.231454735	-0.351460685	-0.38209527	-0.40622611
FAM169A	turquoise	0.721842926	0.376488034	0.081522112	0.42349222	0.107461032	-0.635007181	-0.276903086
YPEL1	blue	0.859089103	-0.305832489	-0.014218649	0.077198469	-0.523065976	-0.073907187	-0.359145613
CCL8	turquoise	-0.214624426	-0.705878393	-0.061592866	-0.113325	-0.233447445	0.734088405	0.298613326
LIAS	yellow	-0.210516349	0.199146256	0.135370233	-0.20868501	-0.145203253	-0.069537577	0.297584886
CD7	turquoise	0.359471763	0.7729682	0.50270659	-0.019509122	0.213371736	-0.706072036	-0.447360482
MYCL	turquoise	-0.460328144	-0.451007163	-0.359946362	-0.071731424	-0.413703649	0.924791303	0.083012187
IFI44	turquoise	-0.423374023	-0.617965891	-0.035399162	-0.212627006	-0.11720109	0.676327845	0.560099516
PLXDC1	turquoise	-0.092890168	0.531763918	-0.280863126	0.278427468	0.430103064	-0.488251983	-0.030920619
TXLNGY	blue	0.32506236	-0.001609687	-0.343477199	0.205402414	-0.237053	-0.182922	-0.208722984
PPBP	yellow	-0.337098362	-0.290670808	0.009259471	-0.157018209	0.163888762	0.099841649	0.950205106
TKTL1	green	0.350437237	0.142448231	0.626870829	-0.282409085	0.026884888	-0.119771472	0.024944603
HCG26	turquoise	0.045141513	0.476417817	-0.177955912	0.267531547	0.460284055	-0.50594389	-0.156176885
XIST	blue	-0.35854884	0.028565053	0.328728199	-0.295687597	0.243614064	0.118266648	0.136604363
HLX	turquoise	-0.038764462	-0.688542042	-0.063864223	-0.062381883	-0.650341572	0.894946082	-0.086084442
CTSW	turquoise	0.69668062	0.247749055	0.198938201	-0.116192783	-0.015265678	-0.728238078	-0.028541611
H2AC8	red	-0.315602809	0.224613602	-0.195785511	0.171461958	0.553508606	-0.173698217	-0.03146305
KLRB1	turquoise	0.553499379	0.236133901	0.254476852	0.07026675	0.240207756	-0.680815139	-0.004816219
ZBTB25	brown	0.147978489	0.650028906	0.585540501	0.236273804	0.697319246	-0.722261007	-0.24444105
ARFIP1	yellow	0.173351093	-0.222104802	0.281646146	0.257751327	-0.43540072	0.465618007	-0.303073614
FCGR1B	turquoise	-0.25931656	-0.351788357	0.204236114	0.276970753	-0.433467279	0.804275287	-0.070471752
H1-3	turquoise	0.159990921	0.075577837	-0.366921298	-0.294130353	-0.228376068	-0.148973423	-0.637766478
AZU1	brown	-0.293868527	0.442627167	-0.13607592	-0.17361586	0.025159431	-0.130086112	-0.072857862
ZNF266	turquoise	0.416755489	0.158070738	0.36609773	0.520516199	0.375750778	-0.301101476	0.146802956
GATC	turquoise	-0.117781297	-0.162532555	-0.020041063	-0.501556505	-0.048837379	0.383033646	0.17537602
ZNF394	green	0.217566412	0.176279767	0.781478839	0.16932121	0.279583673	-0.341087776	-0.04449729
ANKRD36	turquoise	0.273245426	0.197993597	-0.028082537	0.139745752	0.003831047	-0.593068814	-0.197093754
IPCEF1	brown	-0.132111501	0.656732903	0.032233401	0.08226143	0.019552789	-0.110855039	-0.764817068
ZNF204P	brown	0.141588742	0.879412636	0.552247846	0.271597316	0.443264953	-0.61371551	-0.372590264
CEACAM21	turquoise	-0.282996919	-0.311709968	0.514771705	0.224857191	-0.219658754	0.43673541	0.146489383
IGHD	yellow	-0.566050885	0.170020231	-0.151773596	0.177784853	0.40101139	0.046781633	0.497035934
TTTY15	blue	0.376297326	-0.016620383	-0.343470478	0.278291102	-0.245448296	-0.06079755	-0.150432526
CCZ1B	green	0.272838161	-0.028154664	-0.534165002	0.370260296	-0.080723177	0.024310804	-0.270745912
TRIM58	yellow	-0.253892065	-0.342159477	0.07416616	0.153169113	0.188373043	0.133361244	0.907696831
H2AC6	yellow	-0.625502021	-0.086322203	0.064523614	0.00462457	0.387894287	0.221789007	0.76337793
RC3H1	red	0.235401732	-0.288613581	0.00850838	-0.265590696	-0.518519657	0.115844818	0.11562693
TSC22D1	yellow	-0.219220012	-0.532561677	-0.279247212	0.045223829	0.164988913	0.307246364	0.803384973
RRN3P1	green	0.164153531	0.055057204	0.555111068	0.604361964	0.081612807	-0.1687123	0.052604366
KIAA0754	blue	0.490667948	-0.187249011	-0.239507317	-0.252956126	0.051185487	-0.239110921	-0.114737649
ZNF529	turquoise	0.229850469	0.051531498	-0.294498347	-0.101344837	0.02753128	-0.619730389	0.172209925
LONRF1	turquoise	-0.325531416	-0.491988904	-0.280873546	0.184454344	-0.137841608	0.438331204	0.242904755
BEX4	brown	0.037922705	0.742003302	0.286650724	-0.384079661	0.303588622	-0.386712961	-0.262434689
SPATA5L1	green	0.166134801	-0.601022674	-0.758538624	-0.089337283	-0.35841645	0.228106928	0.022621694
CYFIP2	turquoise	0.52551987	0.588634981	0.121232258	0.230298524	0.416979981	-0.83805214	-0.400338943
TRAV8-3	turquoise	-0.00485697	0.822966652	0.221607311	-0.297896254	0.288315362	-0.75530113	-0.324442981
PTGDR	blue	0.805553144	-0.071043049	0.283557574	0.049414337	-0.57765814	-0.209749532	-0.442090414
CD72	red	-0.292947814	0.437076085	0.326101821	0.258208503	0.940937264	-0.418994427	0.153726584
IGLL3P	red	-0.359681758	0.238558555	-0.171408471	0.14438509	0.725221455	-0.328126771	0.488895462
KIR2DS4	blue	0.357939336	0.084120968	0.312078423	-0.12558215	-0.143723731	-0.061263207	-0.012447294
ECRP	turquoise	0.022132685	-0.212862515	0.027354832	0.452628795	0.098071783	0.295313025	-0.272765578
KIR3DL3	blue	0.441760408	0.175762223	0.359215943	-0.262033805	-0.237706707	-0.201887699	-0.199508184
SUPT20H	green	-0.109081529	-0.366769062	-0.891518139	-0.219870503	-0.348028409	0.292576173	-0.170373494
PYHIN1	green	0.188478406	-0.569931178	-0.773554524	-0.016882446	-0.472688556	0.356083632	-0.172047958
ZNF224	green	0.044331906	-0.059226926	-0.849851519	-0.150350798	-0.009728092	-0.099959509	-0.111408386
TRAT1	turquoise	-0.205660038	0.577186397	0.208671816	-0.415986001	0.690036556	-0.50357031	0.269452143
ZNF227	green	0.48164636	0.277751935	0.438269415	0.232403784	0.400592861	-0.302033542	-0.097249418
HLA-DMA	turquoise	-0.429737233	-0.520460517	-0.020080187	0.176826716	-0.341717655	0.852119235	0.077391937
IFIT2	turquoise	-0.149345032	-0.742544488	-0.020173437	-0.009826915	-0.3815588	0.842537351	0.256747604
CYRIB	green	0.016075068	-0.461244619	-0.560822943	-0.006797179	-0.563471006	0.444586786	-0.217875668
ZSCAN18	turquoise	0.013180287	0.131525967	-0.022369321	-0.393798663	0.155654031	-0.242910996	0.032729065
SPDYE2	turquoise	-0.079408132	0.281269773	-0.082514677	-0.122146819	0.001727521	-0.166510844	0.324961055
TLE5	turquoise	0.391918331	0.710481283	0.283152766	-0.078763819	0.476014209	-0.910342689	-0.378819566
ADI1	turquoise	-0.395726545	-0.560466411	-0.341021791	0.348708635	-0.152295765	0.593520803	0.612037655
RAB31	turquoise	-0.330635583	-0.625615474	-0.306807353	-0.121804709	-0.369934788	0.917314581	0.25585183
TNS3	turquoise	-0.395950476	-0.556826109	-0.06442163	-0.033778284	-0.329949304	0.958601419	0.17549673
LIMA1	turquoise	0.714830975	0.169048323	0.069027019	0.296357653	0.161206265	-0.714892885	-0.224662681
AKIRIN1	green	0.064296977	0.598834098	0.901847882	0.152187711	0.307208073	-0.294643265	-0.206651828
HERC2	turquoise	0.195772951	0.177861533	-0.316073146	-0.148831307	0.334376566	-0.527614997	-0.055388917
LAP3	turquoise	-0.23709126	-0.593951166	0.107294371	0.141717229	-0.427156658	0.802826641	0.146998893
NOSIP	brown	-0.15759732	0.970924242	0.332425632	-0.128137533	0.521227032	-0.674142255	-0.324433182
BEX3	brown	-0.464227706	0.808998096	0.442591947	-0.106139482	0.608519714	-0.343947341	0.078956971
NIBAN1	turquoise	0.418646503	-0.8011013	-0.314316956	0.169310313	-0.651379965	0.54795727	0.0996185
VPS51	brown	0.169083375	0.804831319	0.323010484	-0.084938121	0.70125035	-0.832276073	-0.174121315
MSRB1	turquoise	-0.275006743	-0.589267721	-0.210665617	0.147393127	-0.544628123	0.922476125	0.012807972
TSPAN13	red	-0.385829621	0.444850805	0.243524636	-0.035898359	0.870960665	-0.290034368	0.140712054
HSD17B11	turquoise	-0.277677182	-0.351897985	-0.168126942	-0.200164603	-0.310468275	0.652069842	0.158113931
EFHD2	blue	0.850525929	-0.295239782	0.180629543	0.184518609	-0.591067495	-0.001801168	-0.300125009
PPDPF	green	0.069122576	0.130798909	0.721454565	0.096420246	0.164350211	-0.13749466	-0.129779043
TSPYL2	brown	-0.338304996	0.832169141	0.487261793	0.120035743	0.75354626	-0.52242508	-0.349118155
SNN	yellow	-0.449470324	-0.391177831	-0.492376159	0.120768406	0.156754812	0.376634371	0.740664633
RBM47	turquoise	-0.31706599	-0.690854264	-0.257777174	-0.053715262	-0.535932977	0.968277074	0.101024419
SLC12A7	blue	-0.53438508	0.369449412	-0.175782875	-0.120176559	0.241509332	0.059824943	0.031675833
C20orf27	turquoise	-0.261987062	-0.193249802	-0.253619131	0.1121956	-0.394932138	0.412158157	0.29532451
CHMP5	turquoise	-0.081804226	-0.840892549	-0.184128374	-0.073391257	-0.452657329	0.847247523	0.246866883
NPDC1	yellow	-0.380807461	-0.110344864	-0.257221221	-0.461982059	0.442973182	0.059297953	0.449236387
AGPAT5	red	-0.29382781	0.476947064	0.168406609	-0.169288076	0.813278157	-0.355392008	0.324131241
IFT57	brown	0.113538623	0.769603782	0.613402562	0.130192826	0.730964169	-0.714550014	-0.170903134
MFSD1	turquoise	-0.250044809	-0.574231026	-0.141230246	-0.182590848	-0.37010698	0.797319553	0.455927463
CEMIP2	turquoise	0.192834009	-0.117992562	0.023982897	0.030933957	-0.095544156	0.419465858	0.061418736
TSEN34	turquoise	0.22707146	-0.58752716	-0.076822768	-0.212454398	-0.44288302	0.55337534	0.203742886
SLC25A37	turquoise	0.253906064	-0.709787999	-0.083131843	0.175924332	-0.690685332	0.764959712	-0.072457568
DERL1	blue	0.678864884	-0.055767848	0.346535329	0.42104398	0.261431005	-0.37673014	0.083989795
TIMM13	turquoise	-0.041464716	-0.105633695	0.067744071	0.077764302	0.346817715	0.124302516	0.117941104
TNKS2	yellow	0.044564119	0.004711736	0.057781456	-0.170942584	-0.083614382	0.210301299	-0.351353606
NAGK	turquoise	-0.338428995	-0.525739652	-0.266892091	0.153880322	-0.342120493	0.847333706	0.130807638
C1QA	red	0.255723088	-0.269166741	-0.050180964	0.234767593	-0.453487427	0.348735985	0.098581276
SLC38A1	brown	0.024542399	0.921446562	0.503539404	-0.019879963	0.710422215	-0.697176659	-0.353125152
RUFY1	blue	-0.82988439	-0.207703584	-0.079280261	-0.26399445	0.085987822	0.501048236	0.619543496
BDH2	turquoise	0.498013837	0.626588182	0.212117331	-0.298370566	0.313068404	-0.837323931	-0.243215508
OSBPL11	turquoise	-0.064369814	-0.682440256	-0.079191972	0.048222024	-0.62255824	0.91684392	0.150447583
PELI1	turquoise	-0.223005904	-0.38134357	-0.085110017	-0.026390592	-0.41490657	0.871957911	-0.011686412
SNAP29	blue	-0.138743349	0.01288006	0.156148864	0.048563264	-0.042362884	0.003410489	-0.038154232
TMEM176A	turquoise	-0.328086512	0.136720045	0.382034341	0.070674389	0.101431893	0.453977673	0.124003816
SESN1	brown	-0.388605015	0.483414224	-0.360288844	-0.297122823	0.268661299	-0.177735679	-0.26520748
LRRFIP2	brown	0.12781805	-0.868866275	-0.044801215	-0.121557798	-0.483790945	0.629733291	0.392485396
PSPC1	turquoise	0.185536266	0.670777204	0.176673478	0.418121991	0.383876159	-0.554032906	-0.459691942
AKTIP	turquoise	0.36350205	0.602469233	0.09197256	-0.223500038	0.334264528	-0.758511977	-0.312373472
ROGDI	turquoise	-0.146557554	-0.075531686	0.035880887	0.355110567	-0.178429903	0.484065793	-0.23056972
OAS3	turquoise	-0.279175411	-0.772303538	-0.029076318	-0.003583879	-0.379475746	0.802749898	0.403648815
SNX10	turquoise	-0.168318531	-0.634356377	0.050452962	0.359476003	-0.363054725	0.843754893	0.08744156
PLBD1	turquoise	-0.513598686	-0.428840712	-0.192985828	0.032832124	-0.352553559	0.894116842	-0.017778143
DNMT3A	brown	0.116874615	0.746747758	0.594508578	0.02888215	0.255574277	-0.542896197	-0.501205317
TMEM14A	blue	0.758868427	0.202344425	0.2619802	0.224094734	0.264505704	-0.77208481	-0.164769234
ARHGEF3	blue	0.707387381	0.101197567	0.530659531	0.253895656	0.183695681	-0.364693076	-0.02725923
TRPS1	brown	0.059381017	-0.77970333	-0.225290093	-0.381346045	-0.46489345	0.676016516	0.287466711
C1orf115	turquoise	0.273719725	-0.108344937	-0.12904039	0.373329052	0.231783707	-0.387528302	0.251815888
MAFB	turquoise	-0.318505578	-0.529039177	-0.031242598	0.194675408	-0.409441615	0.911809563	0.160317594
LYRM4	brown	0.038023596	0.751984811	0.385340581	-0.205529189	0.42427888	-0.585071977	-0.410169018
MAGEH1	turquoise	0.314778617	0.538623514	-0.149853278	-0.090781468	0.50303648	-0.815387148	-0.217164932
NUDT2	brown	-0.172576063	0.584953884	0.366981915	-0.044005837	0.218196931	-0.370723019	0.110562589
CPPED1	turquoise	0.134436519	-0.708899907	-0.35482755	-0.04474058	-0.77719714	0.815517799	-0.105760264
IER5	green	-0.013188865	-0.193369049	0.586203486	0.396721772	0.163339165	0.278831596	0.098431859
DRAM1	turquoise	-0.387940727	-0.451657273	0.077554743	-0.154561841	-0.297661043	0.8734216	0.000222145
PLEKHF2	red	0.088944671	0.138343107	0.582899083	0.270784769	0.722676839	-0.270896953	0.357509987
CRTC3	brown	-0.144108406	0.911814169	0.618173855	-0.093046006	0.474836202	-0.603988387	-0.297535677
DYSF	turquoise	-0.328542228	-0.427682268	0.180372589	0.201956495	-0.285649645	0.845450465	0.047524991
SMUG1	blue	0.447521141	-0.607404711	0.240994008	0.005728242	-0.222050722	0.21221535	0.271230784
FANCF	green	-0.002989244	0.123534194	-0.446950635	-0.154036535	0.414956642	-0.263840228	0.149874952
NXT1	green	0.173429013	0.420212149	0.668706554	0.084674182	0.183034901	-0.443443226	-0.1522677
CAVIN2	yellow	-0.362545899	-0.238977744	-0.043727275	-0.122150304	0.204775148	0.050093254	0.961968435
PDGFC	turquoise	-0.526415423	-0.412945049	-0.417024082	0.001030855	-0.306211678	0.675381278	0.143169999
RGCC	blue	-0.539672625	0.614900065	0.165080147	-0.018435229	0.378211837	-0.0399456	-0.202119922
LXN	turquoise	0.230703489	0.13277209	0.335965307	-0.076478859	0.297230958	-0.416178659	0.155973253
TAF1D	turquoise	0.411812899	0.422953981	0.208551138	-0.003556102	0.521101594	-0.447520453	-0.267633792
SIDT2	red	-0.313349599	0.003047007	-0.090469102	-0.003208566	0.452285715	0.095312207	-0.067483808
MSRB2	turquoise	-0.352840737	-0.327981083	0.204134295	0.041630383	-0.390057219	0.8508763	-0.05238055
SCML1	brown	-0.205804873	0.81868116	0.351246977	-0.104031894	0.125071631	-0.226485412	-0.636850504
TMEM51	turquoise	-0.423256734	-0.373878367	-0.034138991	-0.255860277	-0.361170501	0.571666251	0.306323705
CHD7	brown	0.098937289	0.868256602	0.146805889	0.108488293	0.589229796	-0.761030696	-0.373797791
FCGRT	turquoise	-0.403351012	-0.594102683	-0.264560716	-0.23116376	-0.563403812	0.903825078	0.228011642
ARRB1	turquoise	-0.211032956	-0.625349983	-0.282253412	0.224102796	-0.546719635	0.908683315	0.162665712
IGF2BP2	yellow	-0.255069766	-0.766903719	-0.325150214	0.003863188	-0.335678136	0.565877301	0.702475587
MTARC1	turquoise	-0.272974624	-0.479295632	0.151112648	0.027386659	-0.477493162	0.802001532	0.011064939
TPPP3	turquoise	-0.377296416	-0.441292608	-0.11566201	-0.49440602	-0.463986446	0.734650159	0.375596063
CENPU	turquoise	0.287073154	0.603621317	0.38981958	-0.032425036	-0.079110046	-0.536963989	-0.470163873
YEATS4	blue	0.299574855	0.117297459	0.578418717	-0.249922196	0.093694009	-0.204764586	-0.358921444
CHST12	blue	0.914737241	-0.347374372	-0.070510538	0.016639751	-0.374184593	-0.332161459	-0.025720433
CDKN2AIP	turquoise	0.208411021	0.62194123	0.575134707	0.260327739	0.544511126	-0.57728376	-0.130515385
EHD3	yellow	-0.168651625	-0.305992022	0.056444878	-0.241462151	0.245472085	-0.009849096	0.79987397
CCDC59	green	0.115239923	0.478457416	0.801036654	0.137044178	0.439920075	-0.536414469	-0.048767087
DDX58	turquoise	-0.36294803	-0.281963779	0.272459192	-0.157299048	-0.218516467	0.603432049	-0.004024796
QRSL1	turquoise	0.35097146	0.448811038	0.205497885	-0.188423439	0.252566056	-0.678405057	-0.548319567
ARAP3	turquoise	0.042393589	-0.777006214	-0.36361147	0.178826818	-0.445283894	0.807180538	0.046972323
PLCXD1	turquoise	-0.610786864	-0.089282184	0.305501577	0.215301078	0.08579808	0.660657558	0.012813221
PCYOX1L	yellow	-0.653803618	0.284527297	-0.065429052	-0.070804419	0.166162235	0.248499514	-0.227043374
KRT23	turquoise	0.028384619	-0.641667041	-0.193252407	-0.070068296	-0.480704885	0.823706672	0.152225066
DDX60	turquoise	0.049454164	-0.654870204	0.078811736	-0.081526592	-0.296561723	0.664775636	0.035642823
PLGRKT	turquoise	0.29696615	0.43751978	0.763379549	0.119110919	0.268095581	-0.566912012	-0.223419477
TMEM140	yellow	-0.309542727	-0.47361062	0.000481239	0.091112519	0.063052275	0.526575635	0.728802868
NUP43	green	-0.337647803	-0.444448307	-0.893179342	-0.209209296	-0.269747511	0.469276165	0.12585421
PLAC8	brown	0.297902493	0.527147743	0.37093967	0.155282349	-0.222501569	-0.182770083	-0.604047588
PLEKHA1	turquoise	0.638960891	0.622205439	0.364600838	0.135482085	0.06633812	-0.666299618	-0.542005886
ZCCHC2	turquoise	-0.059615314	-0.570938361	0.267357754	-0.270770921	-0.282093185	0.464286223	0.181802768
CYB5R4	turquoise	-0.175606466	-0.322484783	0.389624561	0.48074293	-0.181906911	0.607607031	0.196790898
SLC24A3	yellow	-0.030582268	-0.477342884	-0.049245825	-0.108547314	0.017954593	0.032177511	0.952263776
PID1	blue	-0.717897517	-0.2808964	-0.531576186	-0.379343267	0.033477056	0.491737461	0.41761414
FKBP11	turquoise	0.291043607	0.324654345	0.357402953	0.07538496	0.239786958	-0.502888749	-0.26515038
ZNF232	turquoise	0.493604613	0.611231397	0.137013149	-0.175751406	0.134188537	-0.488749979	-0.660347827
PELI2	turquoise	0.172788407	-0.626708452	-0.075709112	0.209857054	-0.51471529	0.70365806	0.356128049
MYO15B	green	0.093163427	0.626812122	0.524034269	-0.042478579	0.381763461	-0.178777794	-0.234277688
FASTKD3	brown	0.381502551	-0.406171125	0.03161547	0.066148887	-0.2929994	0.239301584	0.248686603
USP18	turquoise	-0.131165897	-0.618773065	0.067244082	-0.251752338	-0.463766001	0.658129361	0.15620119
ZNF331	turquoise	0.031438856	0.47205102	-0.218734917	0.016334408	0.432747977	-0.588283797	0.248543746
GIMAP4	turquoise	0.188660559	-0.281680366	-0.179125478	-0.103251698	-0.118226369	0.386595863	-0.073989619
SH3TC1	turquoise	-0.316413973	-0.177777128	-0.267906824	-0.138911904	-0.222044508	0.719588108	-0.193194649
SEMA4A	turquoise	-0.660384101	-0.293704693	-0.349188475	0.051004069	-0.162428966	0.811935233	0.144675106
HSPBAP1	turquoise	-0.209107796	-0.397221069	-0.612741161	-0.019196335	-0.338465743	0.72366872	-0.151046407
C3orf14	blue	0.374607247	0.288968053	-0.029915874	0.010791869	-0.312572876	-0.135636153	-0.33915683
ECHDC3	blue	-0.854730116	0.042996286	-0.12532141	-0.339891109	0.048729446	0.554524958	0.137522901
PDGFD	blue	0.917551193	-0.133525141	0.046251722	0.074347097	-0.355470215	-0.300642043	-0.189934381
ZBTB10	brown	0.220705944	0.595155599	0.808223508	0.264725296	0.366590984	-0.42110526	-0.259563798
TMEM204	brown	0.065997898	0.450152238	-0.05137651	-0.389798738	0.134536578	-0.209218958	-0.202227048
CASD1	turquoise	0.540094297	0.64557244	0.483096398	0.043671683	0.289427367	-0.583399572	-0.496861357
ADAP2	turquoise	-0.309041129	-0.502179794	-0.029226313	0.100226098	-0.590004254	0.896877177	-0.145849329
PGGHG	yellow	0.124282695	0.610821816	-0.077458206	0.031774197	0.240501299	-0.550017826	-0.501259187
NAP1L2	turquoise	0.290440039	0.429437894	-0.172270379	-0.148090901	0.058204302	-0.434330928	0.053351482
HPSE	turquoise	-0.243381124	-0.729317954	-0.100908931	0.034067613	-0.485098365	0.950755227	0.153726705
TREM1	turquoise	-0.089350339	-0.394081268	-0.118324916	-0.200081083	-0.202072543	0.662215918	0.103603343
C1GALT1	blue	-0.541221913	0.071180993	0.18498429	-0.063886104	0.177062713	0.358170676	0.01325037
CLUHP3	turquoise	0.062459236	0.357850386	-0.026592304	-0.119811902	0.462932266	-0.694536197	0.376924666
RUBCNL	red	-0.330348124	0.37312016	0.049846016	0.23338713	0.785942987	-0.214123492	0.257247759
SEC61A2	brown	-0.074466268	-0.27724825	0.017463737	-0.134654801	0.281450677	0.11759954	0.208135833
ADA2	turquoise	-0.462270351	-0.512208834	-0.096854312	0.102291164	-0.40824695	0.86501065	0.187995486
SIGLEC1	turquoise	-0.30608446	-0.605386166	0.187880462	-0.097558544	-0.284764757	0.762927971	0.334676857
B3GAT1	blue	0.878061391	0.082670279	-0.04702079	0.137258968	-0.119665984	-0.505122064	-0.511176237
BCL11B	brown	0.15087552	0.906855633	0.4105019	-0.05171504	0.597538294	-0.801632711	-0.466921965
CLIC3	blue	0.892485924	-0.204665236	-0.072298594	0.094069517	-0.460277571	-0.267678078	-0.051712266
ZNF267	turquoise	0.075049694	-0.778156192	-0.199311605	-0.145975578	-0.483091749	0.825835997	0.19319128
RTN3	turquoise	-0.282585444	-0.571784866	-0.116818804	-0.032064466	-0.203904792	0.830363702	0.308769658
PLEKHF1	blue	0.950376187	0.0209015	0.044449601	0.214144413	-0.055582371	-0.538512066	-0.260222425
KIF16B	yellow	-0.194533352	0.09689612	-0.333021183	0.129645039	0.362371598	-0.165304042	-0.082898212
OGFRL1	turquoise	-0.1835817	-0.730577182	-0.168646777	-0.068349336	-0.404238609	0.870776563	0.166227535
SLC15A3	turquoise	-0.585496574	-0.240950124	0.137070042	0.153706325	-0.287142909	0.822009085	0.061267336
TMEM50B	green	0.147460943	0.280129895	0.435331247	0.217362821	0.432429564	-0.07140429	-0.316710809
RAB20	turquoise	-0.434038304	-0.424764568	0.089684434	0.164069477	-0.288249677	0.844529837	0.367524484
FAM118A	turquoise	0.028151985	0.021535908	-0.302033442	-0.102868702	-0.031932376	-0.278448296	-0.300770651
MREG	turquoise	0.545569482	0.190961111	0.204487508	-0.13807994	0.457351794	-0.651497245	0.047692547
MS4A6A	turquoise	-0.443577598	-0.496642449	-0.165058504	-0.308914237	-0.195577166	0.756882613	0.533977409
RAB11FIP1	turquoise	0.0557324	-0.721164141	-0.118128311	-0.069596531	-0.769233706	0.860480044	0.014610525
RTP4	turquoise	0.130156335	-0.203393354	0.031030092	0.023434223	-0.159598466	0.493058709	-0.209405821
SAMD9	turquoise	0.209499444	-0.564004526	0.129498996	0.053347308	-0.012974782	0.50527927	0.10226653
AGPAT4	yellow	0.612917983	-0.408101945	0.019776067	-0.255411569	-0.158491286	-0.007934276	0.319164069
SMPD3	yellow	0.231240781	0.019490219	-0.133922129	-0.471722886	-0.248771896	0.07513463	-0.334633379
CACNA2D3	turquoise	-0.399819511	-0.404604469	-0.392121258	-0.11415832	-0.443472598	0.839073399	-0.102400883
PILRA	turquoise	-0.359663671	-0.599399713	-0.296709373	-0.098750628	-0.565966519	0.952875747	0.093987837
DHRS9	turquoise	-0.253624862	-0.337294805	0.160845951	0.187814399	-0.442704206	0.495135467	-0.096637215
SMCO4	turquoise	-0.495109115	-0.317544965	0.014862387	0.164940356	-0.300342057	0.811046785	-0.120189657
PVRIG	turquoise	0.568794895	0.478525486	0.24052365	0.149577538	0.363976754	-0.8706263	-0.41051517
GAL3ST4	brown	-0.089041987	0.879955114	0.320633366	0.036006118	0.705601812	-0.610653325	-0.31810126
ZNF432	turquoise	0.541351774	0.159877081	-0.303596513	-0.165102314	0.161609999	-0.347075569	-0.148273936
ZNF14	turquoise	0.428533486	0.365603117	0.328853456	0.085352111	0.609439253	-0.498151844	-0.206081515
HERC5	turquoise	-0.177284951	-0.735336686	0.013918936	-0.102733727	-0.352059341	0.787589303	0.325940492
RCAN3	brown	-0.157025743	0.868088885	0.555228241	0.086729656	0.759039498	-0.474654085	-0.179270344
LINC00339	turquoise	0.148119677	0.201857424	0.110002991	-0.035841711	-0.032416326	-0.35237015	-0.04938721
ZMAT4	blue	0.628876598	-0.475486669	-0.112761903	0.474295375	-0.556466388	0.020552282	0.170785184
CTC-338M12.4	green	-0.150101871	-0.356931962	-0.78618609	-0.221156104	-0.203810658	0.077793595	0.110346234
SLFN12	green	0.247852482	-0.14388414	0.563817671	0.409348126	-0.135458486	0.216078083	-0.356739865
FRAT1	turquoise	-0.216467184	-0.570572531	-0.323671076	-0.273431851	-0.472842085	0.805997456	0.167996261
CLEC5A	turquoise	-0.505450485	-0.649052385	-0.174520657	-0.280833611	-0.299833773	0.844295472	0.408469841
TMEM255A	blue	0.374157002	-0.280801596	-0.22570959	0.524758576	-0.15998558	0.043972188	-0.366650864
SLC16A10	brown	-0.24615831	0.934244205	0.230321088	-0.134635785	0.363134779	-0.494238591	-0.49153788
LTBP3	brown	0.129825858	0.748885041	0.413563192	0.350378402	0.431492671	-0.406530579	-0.383141578
PSTPIP2	turquoise	-0.411126565	-0.43313628	-0.26110695	0.209447063	-0.518221466	0.612987992	0.108919588
CLEC4A	turquoise	-0.507888912	-0.565788684	-0.266173665	-0.068244669	-0.466289791	0.963914875	0.128908361
L1TD1	turquoise	-0.07189133	0.147636068	-0.203109696	0.344705125	-0.15115759	0.18538241	0.025436317
ABHD18	green	-0.156167226	0.049450563	-0.701592319	-0.325749221	-0.207662954	0.061381075	-0.482993653
PLAAT1	yellow	-0.013155438	-0.031233374	0.0329618	-0.062121223	0.433997364	-0.443337855	0.787234274
LGALSL	yellow	-0.231910191	-0.110665687	0.047806992	0.138946804	0.442939417	-0.150335678	0.738117314
SIGLEC5	turquoise	-0.421146878	-0.385722957	-0.03474251	0.149544063	-0.227290742	0.591975343	0.413250765
DDX43	turquoise	0.334560516	0.481333582	0.461508678	0.236219027	-0.114783351	-0.427508799	-0.413169789
P2RY13	turquoise	-0.161116395	-0.565831018	-0.210990071	0.13528584	-0.44195397	0.914338385	0.06916381
CBLL1	turquoise	0.531601698	0.026673857	0.177587617	0.209303091	0.482995874	-0.567044886	0.211981978
APOBR	turquoise	0.192724369	-0.707072739	-0.153288546	0.02046294	-0.776092575	0.751791061	-0.009243039
NOD2	turquoise	-0.423484359	-0.587619085	-0.439208284	-0.163707193	-0.550496877	0.929936841	0.093839167
VPREB3	red	-0.143735743	0.342004979	0.591705623	0.349610084	0.813718428	-0.33879893	0.329555187
HELLS	brown	-0.175345571	0.51212088	0.345108656	-0.179686554	0.381944457	-0.184759803	-0.230523846
C5AR1	turquoise	-0.295452018	-0.624637636	0.063231992	0.197087287	-0.414226537	0.912595202	0.137350893
MCUR1	yellow	-0.058715699	-0.050896274	0.163158005	0.013779374	0.469499764	-0.425686941	0.750585327
NXF3	blue	-0.513000678	0.189099466	0.122776714	-0.050111658	-0.171440319	0.296502777	0.10773581
ANKRD55	brown	0.099918738	0.566555696	0.07589492	-0.342220641	-0.175618573	-0.224579926	-0.472770041
CLEC2D	turquoise	0.24171626	0.562820401	0.290182876	0.027520643	0.615763497	-0.672242383	-0.408749604
TLR7	turquoise	-0.145347384	-0.58713114	-0.036076544	-0.044207003	-0.280649775	0.725464489	0.038702494
TMEM156	red	-0.268183674	0.396868505	-0.005705592	-0.002740006	0.836488614	-0.451059416	0.148208474
GPALPP1	blue	0.391118494	0.250126496	0.376904145	0.310030217	0.294765752	-0.17960321	-0.266113381
AIDA	green	0.099861357	0.338410995	0.434873951	0.285871959	0.671630292	-0.241654847	0.15667157
PPP1R17	turquoise	-0.028195108	0.175293156	-0.209534686	0.059139205	-0.260176049	0.063238752	-0.182498542
SCD5	yellow	-0.209586988	-0.134920652	-0.533987371	-0.162694229	0.014001996	-0.142366512	0.201659841
TASL	turquoise	-0.493891443	-0.490293782	-0.204802665	-0.171000219	-0.217417788	0.920680008	0.13871889
KLF4	turquoise	-0.321389669	-0.445244409	-0.004690458	0.147307234	-0.357794582	0.7986917	-0.10583007
BNC2	red	0.529893232	-0.162381677	-0.130917757	0.174682893	-0.769247869	0.096448463	-0.419741704
TENT5C	turquoise	0.2122396	0.128428516	0.679711105	0.221322616	0.310775592	-0.375529475	0.267696585
CD244	blue	0.789209017	-0.178132797	-0.146755678	0.177935668	-0.496539862	-0.115060969	-0.409125301
MYLIP	blue	0.39504561	-0.3593575	-0.476707114	-0.022017241	-0.503393399	0.218460456	-0.164142233
ARHGEF40	turquoise	-0.162166042	-0.719433127	-0.277654921	-0.174260302	-0.4111134	0.824060317	0.26066875
GP6	yellow	-0.402441315	-0.367759743	-0.137396653	-0.25720669	0.189404482	0.174516434	0.941834593
ENGASE	blue	0.878058142	-0.140290946	-0.261984059	-0.017596714	-0.346006422	-0.212378267	-0.368524522
KLHL28	blue	0.469615815	-0.061926179	0.330884798	0.163956096	-0.20526785	-0.109816579	-0.387073681
NME8	turquoise	0.273852262	-0.36703179	-0.251462809	-0.383450081	-0.655663784	0.557187724	-0.259433476
UBASH3A	red	0.066973255	0.38531023	0.427165978	-0.011241127	0.709483695	-0.470577109	0.122735347
BTNL8	turquoise	-0.113203283	-0.72757226	-0.083266603	-0.265476397	-0.494153553	0.761336367	0.27429971
SIRPG	brown	-0.317313431	0.739439239	0.369736531	0.138287532	0.57022123	-0.409601855	-0.432478398
CLEC1B	yellow	-0.492533323	-0.441484046	-0.247578754	-0.345342399	0.00465886	0.280189188	0.866674095
TMEM176B	turquoise	-0.295688507	0.067583068	0.440152165	0.002116223	0.084210145	0.443380762	0.145556074
TSPAN32	green	0.458798479	0.376748482	0.559620345	-0.001703855	0.092215902	-0.451963588	-0.026715744
RETN	yellow	-0.150307753	0.587928892	-0.118150838	-0.56136074	0.37298187	-0.309275181	-0.308052668
ADPRM	brown	-0.145708044	0.815619058	0.194761049	-0.192547267	0.391404703	-0.505947884	-0.43016633
LOC202181	yellow	-0.250649367	0.244761776	-0.35135373	0.437563675	-0.066525633	0.055014493	-0.45712387
SYTL2	green	0.136937727	-0.178079113	-0.791985012	-0.137996862	0.05487624	-0.018834391	-0.040554155
ZNF532	brown	0.160374536	-0.678252351	-0.048282267	0.27071686	-0.102701761	0.464917377	0.442470069
KLRF1	blue	0.628421579	0.145812996	0.001640413	0.108654874	-0.435606119	-0.2580255	-0.340312368
TBX21	blue	0.933337731	-0.177655807	-0.146248646	0.103364246	-0.319734447	-0.277303582	-0.264307763
MZT2B	green	0.10003998	-0.173407572	-0.724808125	-0.017826107	-0.183185937	-0.045174634	-0.128531819
SLC12A6	blue	0.319088539	0.186371831	0.448238615	-0.00880552	0.016261071	0.114295822	-0.589177357
FAXDC2	yellow	-0.338615872	-0.385858374	-0.2550512	-0.160760707	0.121122017	0.24027915	0.948812179
SNHG32	brown	-0.101878934	0.707277572	0.608797197	0.262849216	0.446076807	-0.360147856	-0.080378296
KIF13A	turquoise	-0.196273452	-0.701317152	-0.197874157	-0.127156986	-0.519864163	0.84433155	0.01777699
UTS2	blue	0.558175569	-0.343670294	0.040457128	-0.218295192	-0.072597578	-0.121746316	-0.019297569
TLR8	turquoise	-0.23923488	-0.545120886	-0.21005147	0.055770665	-0.316599769	0.924585657	0.021723547
PDSS1	turquoise	-0.166153477	0.113050426	0.003224461	-0.487825874	-0.272404031	0.357277111	-0.26570283
MANSC1	turquoise	-0.004511395	-0.447438625	-0.302899329	-0.149253683	-0.348560649	0.550467269	0.066938814
TRMT1L	green	0.26761266	-0.146568129	-0.173628948	-0.266368266	-0.055739726	0.109934216	0.162527306
ITM2C	red	-0.56020782	0.345923373	-0.102588664	-0.378516927	0.702751082	-0.160052713	0.373107533
LBH	brown	0.245658871	0.818162182	0.30045644	0.062688458	0.590451472	-0.828408655	-0.353704053
ASAP1	blue	-0.733285165	-0.090209601	0.11262485	-0.197458653	0.073016279	0.641457905	0.436984116
DENND2D	brown	0.324369248	0.744827845	0.025399828	0.220648683	0.39479529	-0.633064181	-0.548999286
IKZF3	yellow	0.162011834	0.372405162	0.092440503	0.022647702	0.41737551	-0.431741127	-0.491224159
CCPG1	turquoise	0.097872602	-0.723095657	0.102377978	0.17202937	-0.477579678	0.78405703	0.112682548
CABP5	yellow	-0.24005476	-0.154838527	-0.039183498	0.244026152	0.281273449	0.00219499	0.833215799
NBEA	brown	-0.298616118	0.729180785	0.186479112	-0.129138373	0.434698431	-0.245491431	-0.364336876
NPL	turquoise	-0.236243207	-0.423080356	0.146426313	0.054861142	-0.37495579	0.834383222	0.080012779
MAP3K7CL	turquoise	-0.314527593	-0.337612107	-0.174116586	-0.285604926	-0.318343841	0.405205365	0.531399223
CISH	yellow	0.075864486	-0.209304874	-0.299875975	-0.078874224	0.305694924	-0.156188159	0.497243546
BACH2	brown	-0.298871192	0.836260832	0.032583377	0.105755592	0.760495144	-0.564264064	-0.182031255
HDHD3	brown	-0.178430239	0.771448193	-0.014975857	0.015703313	0.364012423	-0.531338732	-0.358298747
ABHD17A	blue	0.915035891	0.167761742	0.09549059	0.199973637	-0.24529928	-0.549790587	-0.419238886
SGPP1	green	0.448600695	0.178966772	0.551075138	0.531446399	0.270098131	-0.087978179	-0.270812493
C1orf21	blue	0.88189167	-0.068605146	0.099357889	0.067672541	-0.229363297	-0.427216105	-0.151169352
MZB1	red	-0.404788395	0.237322354	-0.006512167	0.085981857	0.772956697	-0.113396001	0.334288759
GPR22	blue	-0.317961651	0.218972619	0.001972708	-0.329005522	-0.118165281	0.224254148	0.193499139
FFAR2	turquoise	0.033863819	-0.689706444	0.070140509	0.195610048	-0.386028023	0.819156993	0.124644259
S1PR5	blue	0.917736694	0.013559376	0.187633222	0.165309541	-0.209699953	-0.446359579	-0.283700942
RNF146	turquoise	0.182096784	-0.137432404	0.206233083	0.172938424	-0.044593402	0.394895293	0.085173255
RRAGD	turquoise	-0.059456124	-0.44434233	-0.270975508	0.202562975	-0.543030541	0.72996357	-0.211645105
LSG1	turquoise	0.418975141	0.50003758	0.494090942	0.080504155	0.63080423	-0.748577757	-0.087054103
SOAT1	turquoise	0.150953278	-0.56485958	0.181845137	0.282149262	-0.206483404	0.64191571	0.075650007
CALHM2	turquoise	0.469014722	-0.703009033	-0.288769429	0.215452363	-0.710278801	0.577583896	-0.129578664
E2F5	red	-0.171439923	0.609960325	0.299581168	0.238278931	0.953776564	-0.529351122	0.074622794
FCMR	brown	-0.03943035	0.892269848	0.235169016	0.126186358	0.716693655	-0.808720144	-0.293262378
ACOT9	turquoise	-0.339937637	-0.66052659	-0.527650458	-0.149361901	-0.573249131	0.890927402	0.167030886
ZNF83	yellow	-0.382794516	0.44048428	0.341506061	0.34777551	0.086163643	0.122371741	-0.518863442
CORO1C	turquoise	-0.313913296	-0.513152174	-0.21205996	-0.32450021	-0.214490854	0.769568853	0.365049485
PIGP	blue	0.472294978	0.283749942	0.355002426	-0.164808591	0.060541703	-0.369948153	-0.688737204
NLRP2	turquoise	0.274635118	0.441635799	0.508336435	0.030825186	0.276783706	-0.36458313	-0.417224818
TENT5A	turquoise	-0.116571713	-0.588273282	-0.090243194	0.059221	-0.538918553	0.894501457	-0.003055133
LDLRAP1	brown	-0.392706053	0.834075873	0.21392419	-0.021877422	0.565313343	-0.273520224	-0.226211408
SHTN1	red	0.052307303	-0.40581932	-0.340391681	-0.074371523	-0.758416612	0.638893117	-0.162999493
RAB15	grey	0.040854631	-0.126281668	0.040629888	0.826102234	0.183422391	0.025482565	0.169712947
TMEM268	turquoise	-0.384854806	0.078838549	-0.087403878	0.112581892	0.134086387	0.52643922	-0.337016412
MOSPD2	turquoise	-0.402038181	-0.31576606	-0.298502331	-0.179979836	-0.533301116	0.73970186	0.050397495
EOGT	red	0.57232957	-0.630446997	-0.063422838	-0.18182011	-0.543844103	0.138062511	0.108330872
GUCY1A1	yellow	-0.343337867	-0.427247663	-0.152332905	-0.183930205	-0.246760322	0.480978689	0.676675324
WLS	turquoise	0.026054151	-0.534249897	0.275095037	0.064971498	-0.341772532	0.761273376	0.132700591
NPIPB15	green	-0.126398863	-0.350180361	-0.662184168	-0.299439181	-0.002093179	0.073462619	0.282836396
AMIGO2	turquoise	0.234340911	0.684736866	0.483221383	-0.247484227	0.57698958	-0.746192779	-0.214173464
NSUN6	turquoise	0.318251989	0.339205434	-0.159644541	-0.228964058	0.072433304	-0.492996812	0.149260059
ERV3-2	yellow	0.243311335	-0.085263293	0.29367959	0.361915549	-0.331042226	0.243310771	-0.609531768
ADAMTS1	blue	0.722406575	-0.341631452	-0.207328054	0.399613331	-0.09663323	-0.225775377	0.276792657
SLC27A3	turquoise	0.176166464	-0.652813876	-0.349265652	-0.188595068	-0.562892981	0.627729467	-0.132791396
SH3BP4	turquoise	-0.123478241	-0.240154417	-0.662896357	-0.455496599	-0.328959857	0.471387784	-0.094601212
ZNF480	red	-0.39622277	0.6118685	0.133486336	-0.080374863	0.801687786	-0.282556205	-0.015734977
PDCD4-AS1	brown	-0.271234354	0.875784568	0.340048365	0.151432758	0.510153709	-0.370981312	-0.525044976
LOC100996756	turquoise	0.297181323	0.336755199	0.382904117	0.071201479	0.631257711	-0.575496654	-0.146281497
TMEM167B	blue	-0.196712659	-0.145945625	0.256103388	-0.278169357	-0.035454666	0.159402589	-0.237450897
ZNF703	turquoise	-0.19793133	-0.097252365	-0.035250462	0.50366629	-0.421248016	0.434017903	-0.203337098
CMTR2	brown	0.334767265	-0.486780609	-0.103240638	-0.21223983	-0.011835594	0.157337237	0.103939284
RLIM	green	0.274355736	0.278753475	0.765685327	0.192812645	0.323189862	-0.14026981	-0.243201695
CENPK	green	-0.203440686	-0.161924785	-0.727786351	-0.037216389	-0.048753907	-0.101282521	0.426249729
KCNE3	turquoise	-0.133092223	-0.49029613	-0.256753234	-0.098697319	-0.56335003	0.884320623	-0.028660666
YWHAG	turquoise	-0.218477145	-0.501338912	-0.435860267	-0.052140739	-0.251016114	0.819371025	0.002657176
PRELID1	turquoise	-0.008376351	-0.426779562	-0.017049623	0.341772609	-0.55902487	0.604410949	-0.065662241
SLC40A1	turquoise	-0.23311256	-0.611641564	-0.128275268	-0.319562823	-0.334121777	0.727849871	0.590243043
FAM107B	red	0.169157763	0.651869527	0.496085602	0.195689007	0.838712225	-0.768567161	-0.030837285
C1orf198	yellow	-0.056654028	-0.47415465	-0.050823062	-0.071567336	0.035294203	0.119410917	0.936628322
MFSD14B	brown	0.232515397	-0.411364286	-0.259144567	-0.355381153	0.061481234	0.187932612	0.248732212
FUCA2	turquoise	-0.367826325	-0.451564967	-0.213856017	-0.18346578	-0.577309817	0.926582175	-0.077498946
DENND11	green	0.081068135	0.400802351	0.525311503	0.123261774	0.621347288	-0.503929307	0.311114077
RHOU	brown	0.257651645	-0.74574862	-0.237304626	-0.187618338	-0.286962817	0.415601248	0.462996853
SELENOS	turquoise	0.507081844	-0.340959321	0.147844428	0.047191703	-0.41962828	0.300674589	-0.137703993
CHURC1	blue	-0.656983765	-0.078397803	-0.393074027	-0.399441416	-0.081331055	0.344196133	0.340838495
HACL1	blue	-0.301448068	0.405351775	0.347941128	-0.331480168	0.31928013	-0.166141561	-0.396279777
NFKBIZ	green	-0.065787262	0.283376075	0.722392579	0.348707797	0.062446296	0.077691365	-0.242666505
PARP9	turquoise	-0.123340041	-0.674165074	0.137451472	0.140813098	-0.352982538	0.857246027	0.185881497
GSKIP	turquoise	0.348269461	-0.245547145	-0.300223164	0.23576445	-0.012823128	0.263495263	-0.194393368
STRBP	red	-0.215655739	0.675627415	0.274920341	0.049955556	0.962654905	-0.604719806	0.046515422
ORMDL3	turquoise	0.363948979	0.340850581	0.433153561	-0.161788933	-0.088140943	-0.641911664	-0.17528406
NTPCR	red	0.058648659	0.081684863	-0.190185743	0.021519078	0.311397109	-0.146032188	0.156845169
SMIM3	yellow	-0.151521284	-0.421421158	0.013433745	-0.174167349	0.265944729	0.235860161	0.84013826
SLC25A33	yellow	0.125888756	0.563889409	-0.018215074	-0.161191358	0.030977196	-0.39305192	-0.699983531
NT5C3A	blue	-0.636832087	0.059130396	0.309906382	-0.018130132	0.403655029	0.129952306	0.420938438
EBPL	brown	-0.125717901	0.895815436	0.530809172	0.14081578	0.577586133	-0.630713895	-0.209331278
DDX20	turquoise	0.618338007	0.226078215	0.414838996	0.029239494	0.219772966	-0.501493624	0.003431563
ATL1	turquoise	0.221683506	-0.450943413	-0.157244582	0.367918192	0.032294826	0.249448478	0.039053247
MS4A7	turquoise	-0.293177435	-0.405491345	-0.496410906	0.030078445	-0.64423336	0.785511104	-0.058023106
BOK	green	0.34385828	0.17856767	0.527617501	0.166833001	-0.059007415	-0.025691979	-0.460074343
BRI3	turquoise	-0.510610032	-0.34403839	-0.010649671	0.025842464	-0.373105108	0.92705393	-0.024174612
TSHZ3	brown	0.449385934	-0.712596802	-0.138015214	-0.148287889	-0.522890345	0.328640519	0.08369904
KBTBD7	turquoise	-0.035595523	-0.380492264	-0.37634659	0.127250607	0.010769849	0.569512776	0.212655049
GPR160	red	-0.508081391	0.460516315	0.191467753	0.135513564	0.599947673	0.065008055	-0.127869812
GBP3	turquoise	0.048152599	-0.353092528	0.047636142	0.650243034	-0.382061876	0.406712168	0.182828402
CXCL16	turquoise	-0.252415723	-0.542668931	-0.155616699	0.084357667	-0.482434203	0.906837771	0.15216994
OSBPL5	blue	0.75613217	-0.36377967	-0.016062931	0.258139494	-0.703902428	0.074950285	-0.28945638
PIGM	turquoise	-0.137777804	-0.467775275	-0.499185888	0.156265456	-0.364968562	0.722008397	-0.047294493
TNFSF13B	turquoise	-0.294556964	-0.652897613	-0.152764186	0.061984826	-0.519282381	0.988339048	0.131678139
PDZD4	blue	0.442534814	-0.115802805	0.00531088	-0.005181767	-0.206146272	0.225286653	0.022629779
PLPP5	red	-0.255808892	0.706405009	0.57876766	0.304332068	0.867900568	-0.461365534	0.053179845
SPSB2	grey	0.12519682	-0.160439735	-0.293034585	-0.613248193	-0.244831715	0.098598263	0.051738034
TNFAIP8L2	turquoise	-0.338290811	-0.25775919	-0.46701035	0.070721859	-0.089134721	0.629638947	0.087298908
RNF135	turquoise	-0.402218033	-0.488196752	0.074729128	0.144135406	-0.323016999	0.932751838	0.11913965
GPR34	turquoise	-0.613803739	-0.196094592	-0.240808908	-0.508685916	0.064726886	0.552041003	0.224657198
IFI27L2	yellow	0.454396448	0.036164664	0.415954892	0.135330707	-0.264888127	0.107230196	-0.483391735
C19orf33	yellow	-0.146290568	-0.157257771	-0.270391079	-0.151211804	0.228832933	-0.29685615	0.659684324
AS3MT	green	-0.08516154	0.18258997	-0.379013811	0.075086725	0.213280408	-0.187631785	0.218590576
HEMGN	blue	-0.68788607	0.184375914	-0.268112633	0.000238804	0.652033916	0.034400199	0.32822337
LRMDA	turquoise	-0.059427212	-0.631626558	-0.014396368	-0.434269607	-0.437582654	0.741438919	0.222398204
ACRBP	yellow	-0.487655894	-0.409179317	-0.210268491	-0.144895651	0.134734656	0.251220364	0.941003535
AGPAT4-IT1	brown	0.578970954	-0.628864439	-0.460677732	-0.271732719	-0.266164061	0.057382631	0.276182945
TTYH2	turquoise	-0.052382428	-0.503418861	-0.002634881	0.271578062	-0.493427187	0.724684291	0.162277365
C2orf88	yellow	-0.520393115	-0.300527345	-0.120391506	0.049025981	0.266346006	0.129630442	0.768810071
DDX11L2	yellow	-0.469006244	-0.396032974	-0.371674535	-0.012327298	0.113769807	0.494618118	0.778134922
LOC114224	green	-0.258723217	-0.074505663	0.439309724	0.068607689	-0.218544083	0.324287544	-0.012215923
RGS18	yellow	-0.537188174	-0.483369622	-0.408030754	0.113941848	0.014845641	0.445100067	0.713089923
SLC46A2	turquoise	-0.39901922	-0.511430577	-0.211151665	-0.043779307	-0.358787223	0.86327348	0.181731138
FGFBP2	blue	0.952600583	-0.112072184	0.108470494	0.038507407	-0.336672006	-0.329935389	-0.294560626
FLYWCH1	turquoise	-0.069042153	0.283822474	-0.166425848	-0.055504488	0.029818699	-0.34078646	-0.447618538
ANGPTL6	turquoise	-0.379015287	0.135456402	0.149963633	0.141184153	-0.285675733	0.381670332	0.041419387
C19orf12	blue	0.722447943	0.038810782	-0.195399726	0.147795252	-0.067795967	-0.371592099	-0.311645293
HSD17B7P2	brown	-0.340849559	0.753336299	0.278320348	-0.134724383	0.453483697	-0.257125689	-0.257149219
P2RY12	yellow	-0.609366315	-0.429376644	-0.307703341	-0.24440438	-0.06477591	0.619434692	0.661199473
ACAD9	yellow	0.08831175	-0.012544235	-0.218240763	0.097368997	-0.271556743	0.12085918	-0.469005272
BDP1	yellow	0.099649634	0.45948655	0.315936696	-0.265026178	0.199467821	-0.362059771	-0.543241936
DGAT2	turquoise	0.145374014	-0.618144012	-0.214897575	-0.117848235	-0.674769631	0.727872098	-0.20382938
BMS1P20	red	-0.118444245	0.5740433	0.253735388	0.149326618	0.793376026	-0.582978451	0.19600866
BEX2	brown	-0.164411208	0.950072617	0.403519409	0.050802598	0.601665813	-0.706634358	-0.311423511
TMEM121B	turquoise	-0.226601401	-0.614213957	-0.248396228	-0.373564646	-0.610025396	0.726660922	0.189981356
CARD6	turquoise	-0.223218749	-0.547927629	0.139601169	0.029845734	-0.410579348	0.885528603	0.113234078
CDCA7	blue	0.499885897	-0.401522729	0.156158725	-0.057738304	-0.115507353	-0.088457196	0.297235594
NIPSNAP3A	turquoise	-0.26195041	-0.630113922	-0.174267314	0.095865742	-0.610881763	0.739752066	0.067178847
GPAT3	turquoise	-0.490068379	-0.545472054	-0.05272975	0.128131609	-0.279317794	0.902673584	0.360704674
ZNF559	blue	-0.424226726	0.350211087	0.06541605	-0.469740707	0.452934372	-0.198945507	-0.238216741
PARP14	turquoise	-0.019720874	-0.630232957	0.16711689	0.01721023	-0.234318723	0.66415044	0.251014747
CYSTM1	turquoise	0.092307745	-0.476072485	-0.346744068	0.256418456	-0.430074208	0.610204422	0.07880949
C12orf57	turquoise	0.27378846	0.759701062	0.493593093	0.07125281	0.599043689	-0.848926926	-0.24143708
SULF2	turquoise	-0.404333796	-0.487740579	0.13304579	-0.049451115	-0.21752811	0.744064584	0.246355641
PIM3	green	-0.067952546	-0.198470038	0.330497394	0.264838017	-0.270802844	0.310315667	-0.030346304
ARHGAP21	yellow	0.068056079	-0.454527307	0.130979522	0.097555873	0.059105544	0.166354317	0.832142591
ARRDC3	green	0.258118314	-0.099830519	0.194427983	0.174666068	0.114803114	0.140870372	0.353766116
CPEB4	brown	0.092331777	-0.715042865	-0.109220296	-0.113903463	-0.317807949	0.601968738	0.541707847
TP53INP2	green	-0.058407509	-0.105758959	0.493783427	0.352382444	0.081067134	-0.012142846	0.022684773
ANO6	yellow	-0.044141587	-0.619445744	0.106764085	-0.103159813	-0.182555782	0.363002548	0.845350729
SETD7	turquoise	-0.462177122	-0.593988115	-0.24176052	-0.204485391	-0.493544946	0.907179291	0.21386123
NT5C3B	yellow	0.084846326	0.515352627	-0.052820331	-0.300513419	0.456625957	-0.404981646	-0.396969629
CDCA7L	red	-0.057221065	0.819527145	0.407202951	0.240905937	0.804180243	-0.689255656	-0.042743434
COPRS	turquoise	-0.161256429	0.122957448	0.153200168	-0.013438534	-0.091439098	0.353844807	-0.308228455
C12orf75	blue	0.728894388	-0.127056784	0.030048169	-0.022338754	0.011219947	-0.581788034	0.003028199
TMEM181	blue	0.831086271	-0.29180686	-0.359910623	-0.140052631	-0.247203768	-0.339388478	-0.143036631
DPH3	turquoise	0.152876775	-0.538189037	0.148554514	0.160393888	-0.381767141	0.546280319	-0.131804158
RAB24	turquoise	-0.314970568	-0.422423275	-0.331420437	0.254504984	-0.470205099	0.826032967	-0.032133042
SRXN1	brown	0.340883847	-0.524393876	0.303060622	0.167577869	-0.34222632	0.366326776	-0.103151514
ARRDC4	turquoise	-0.110073989	-0.579212037	-0.240804028	-0.22177087	-0.431732956	0.699504405	0.495813955
PNPT1	turquoise	-0.511117062	-0.1939897	0.306983533	0.160554832	0.142796964	0.644530132	0.225756417
SLC25A29	yellow	0.026633593	-0.273357212	0.093931642	0.188438201	-0.08274913	0.145156699	0.309268439
OCIAD2	brown	0.036108522	0.890478754	0.481401566	-0.038525332	0.58476076	-0.843578672	-0.298381749
FBXO32	green	0.210627812	0.550235036	-0.201307725	-0.230069985	0.506641147	-0.603589852	-0.184497435
CCDC50	green	-0.167280772	0.149726437	-0.256568415	-0.381929504	0.097959275	0.19031146	-0.235331331
BORCS7	blue	-0.241286067	0.266880496	0.047011823	-0.254941223	-0.025793877	-0.051441505	0.093474888
MTERF2	turquoise	0.652077062	0.265797462	-0.190544342	-0.100128642	0.055495586	-0.407007802	-0.525082688
SH3BGRL2	yellow	-0.241252035	-0.068812844	0.005345249	-0.214083406	0.231984786	-0.104076674	0.890265187
ESAM	yellow	-0.100505996	-0.272495696	0.273624711	0.031406189	0.202838081	0.019336638	0.78296433
VSIR	turquoise	-0.606580313	-0.36862745	-0.273744978	-0.451095154	-0.314160915	0.706237403	0.116840225
LOC93622	turquoise	0.53810868	0.437551342	0.079396949	-0.081969771	0.27865098	-0.720115723	-0.185955165
RNF149	turquoise	0.153519892	-0.519122739	-0.215449605	0.042593105	-0.303735082	0.713240266	0.033701175
TRAPPC6B	brown	0.18160851	-0.810345871	-0.503501081	0.041853823	-0.391264009	0.590882365	0.435661424
RPL22L1	brown	0.281759998	0.495653081	0.575566241	0.159520215	0.49448483	-0.436214251	-0.138685938
CSRNP1	green	0.098248865	-0.07451703	0.751029133	0.197833207	-0.036685172	0.092101478	-0.064606014
INAFM2	yellow	-0.240845274	-0.57040437	-0.30526463	-0.212410181	-0.093289753	0.427505033	0.862159275
ITPRIP	turquoise	0.498432871	-0.325903979	0.437706063	0.195397498	-0.338946727	0.354180266	-0.213020477
ALG2	green	0.311128121	-0.196353164	-0.335455627	-0.262349844	0.11262515	0.115614933	0.043645742
UBE2E2	turquoise	-0.302457526	-0.438815244	-0.077699143	-0.136617619	-0.373579367	0.839468342	0.090967654
CCDC167	brown	0.295574215	0.704615431	0.341804362	-0.271851038	0.049126222	-0.570563333	-0.421713881
ANKRD50	turquoise	-0.302312118	-0.6202413	-0.373871437	-0.019362782	-0.426045229	0.897493574	0.311168935
RNA45SN5	green	0.147205696	-0.305861418	-0.729753661	0.089527153	0.011233683	0.003518535	7.11E-05
TSPAN33	yellow	-0.13275957	-0.252593598	-0.203796729	-0.173187523	0.23552133	-0.153444542	0.864984649
UBE2F	blue	0.860030962	-0.352708017	0.006034326	0.136485756	-0.2058971	-0.137576456	0.013197824
SMDT1	turquoise	0.262369959	0.073559907	-0.184930771	0.005435881	0.361239095	-0.285220017	-0.161568284
HENMT1	blue	0.926077532	0.069979854	0.158926251	0.136404537	-0.067711096	-0.623285876	-0.273209006
NCEH1	turquoise	0.080122849	-0.700744188	0.015998716	-0.188319759	-0.396604408	0.744897158	0.364829782
SNHG17	brown	0.117090925	0.54657509	0.566377379	0.471117165	0.483138037	-0.301618048	-0.243828184
LRATD2	brown	-0.189355845	0.845001342	0.455229792	-0.349116106	0.450525018	-0.534279717	-0.32842379
ATG16L2	turquoise	-0.194612729	-0.60679871	-0.461399699	-0.021081115	-0.527199869	0.854483235	0.009469765
DDX5	brown	-0.096057205	0.791351793	0.609331393	-0.229601117	0.452505818	-0.516745985	-0.382493682
CCDC137	yellow	-0.067021595	0.521774593	0.234719832	-0.04397311	0.24408637	0.043102169	-0.657003493
EIF4E3	turquoise	0.347786085	-0.21641272	-0.009232074	-0.285628047	0.172594368	-0.278335219	0.222121013
MIDN	brown	0.574911663	-0.471306179	0.248270883	0.2624892	-0.527608558	0.319491531	-0.21432812
METRNL	blue	0.535737624	-0.25390024	-0.177417325	-0.116207295	-0.673672629	0.278034294	-0.193998981
KIF21A	blue	0.904560538	-0.165973854	-0.167696737	0.162389661	-0.226160123	-0.344154315	-0.358086015
MTURN	yellow	-0.065702233	-0.435838766	-0.135051659	-0.151806279	0.073228929	0.083169768	0.956633663
NAPEPLD	green	0.504605924	-0.325764191	-0.69239902	-0.060455879	-0.152841792	-0.070745042	0.025996956
PRICKLE1	red	-0.103152612	-0.106652385	0.104956765	0.066922476	0.505469719	-0.060792819	0.115672551
TIFA	red	-0.039142241	-0.109272356	-0.157907199	0.094271746	0.590406044	-0.135813416	0.386684848
PLEKHG1	red	0.013124815	0.383781098	0.28351079	-0.162872512	0.730661474	-0.655118545	0.137938309
SLC9A3-AS1	blue	-0.562149454	-0.185035787	-0.162606556	-0.381832644	0.015773908	0.207723766	0.45108838
OTUD1	green	-0.167743831	0.214456429	0.839673645	0.23435112	0.184123241	0.109362286	-0.257404364
TTC7B	yellow	-0.069962777	-0.457963843	-0.051643559	-0.161617887	-0.007321561	0.137178952	0.94562764
SBF2	turquoise	-0.302767	-0.644429669	-0.08416907	-0.100086293	-0.492030498	0.939800498	0.038309041
FMNL2	red	0.348624918	-0.477934907	-0.379270634	0.225532267	-0.672221372	0.516230776	-0.039459789
ZSWIM6	turquoise	-0.366213507	-0.688836595	-0.428480262	-0.20160626	-0.506690708	0.890099261	0.212072038
JDP2	turquoise	-0.231676232	-0.493269535	0.052058098	0.00708663	-0.582233168	0.810758518	-0.007665838
SVIP	red	-0.214614026	0.69755073	0.689763944	0.287664552	0.784296924	-0.486821268	0.054639427
FUT11	blue	0.91438923	-0.349240426	-0.219092452	0.156041838	-0.27542423	-0.224060764	-0.165415483
TCEA3	brown	-0.309362513	0.751580915	0.090033071	-0.094115693	0.237849541	-0.358368977	-0.280495846
STARD4	turquoise	0.55741592	0.049409167	0.236880718	0.309673695	0.138739378	-0.59194538	-0.144542376
ERI1	blue	0.383989282	0.331873758	0.447749984	0.02880486	-0.032721629	-0.009223997	-0.472966496
PAQR8	green	-0.008635171	0.380386943	-0.252986221	-0.402969943	0.343229086	-0.271181995	-0.218601155
DIPK2A	turquoise	0.024428241	-0.608683638	0.037769673	-0.03114404	-0.146914881	0.686683421	0.416755551
TSTD1	turquoise	0.160392666	0.705504037	0.361707209	0.294400179	0.532122957	-0.788613913	-0.329276531
TMCC3	turquoise	0.410829318	-0.197808923	-0.108633054	0.349025317	-0.171875629	0.228250781	0.048671697
FBXO30	turquoise	0.24045774	-0.269825172	-0.236780765	-0.045291769	0.155048953	0.208125681	0.173268429
SBK1	blue	0.916370718	-0.080212458	0.240773492	0.190944907	-0.228571105	-0.35832347	-0.200378382
FAM102B	brown	0.256448899	-0.767823024	0.08382797	-0.200235385	-0.671145205	0.574106579	0.079389433
SAMD9L	turquoise	-0.022135589	-0.527031026	0.237947915	0.122006542	0.030603738	0.53600346	0.321657755
MUC20	green	-0.489786569	0.654872947	0.216745986	0.269067189	0.676484042	-0.268329826	-0.015122575
SLC43A2	turquoise	-0.125277727	-0.471793284	0.022936207	0.077698044	-0.457709872	0.87560402	-0.026838005
ZFAND2A	green	0.209063186	-0.028713763	0.698408717	-0.029745949	-0.109795546	-0.064066289	-0.071515681
CMPK2	turquoise	-0.237274703	-0.697765501	0.116743231	-0.001609532	-0.416059472	0.818289868	0.284550493
NAPRT	turquoise	-0.10282775	-0.694699966	-0.148347745	0.392503603	-0.319860329	0.625966998	0.351019092
CYP4V2	blue	0.797035856	-0.070048503	0.327054246	0.268352222	0.112583922	-0.410284509	-0.092615482
MPEG1	turquoise	-0.463638067	-0.501592674	-0.320290433	-0.031866168	-0.366825562	0.930938849	0.175966256
TTC32	brown	-0.081620342	0.869101549	0.35205462	0.063726619	0.415287243	-0.528459165	-0.409021003
RFLNB	turquoise	0.019430183	0.593162788	0.031008931	-0.020208301	0.469631582	-0.710416131	-0.345501342
RNF217	turquoise	-0.256616072	-0.480148017	-0.086375307	-0.209943144	-0.628834585	0.866139245	-0.145095907
SCFD2	yellow	0.064859586	-0.137690863	0.295927328	-0.052362031	0.315438045	-0.163674563	0.794093094
PXYLP1	turquoise	0.247557466	0.443807591	-0.017377168	-0.200692132	0.020814884	-0.217257117	-0.3202348
CPEB2	brown	0.368305118	-0.598920754	0.29756234	-0.039336065	-0.282124203	0.322601767	0.344008373
IGIP	green	0.042752428	0.402417425	-0.59729827	-0.247380506	0.147659764	-0.460774108	-0.285713214
LCLAT1	brown	-0.029982984	0.586445115	0.347703935	0.080763723	0.580559941	-0.412748878	-0.518625397
PPP1R14A	red	-0.113643406	0.31880178	0.276204105	0.098227977	0.86329397	-0.41849845	0.304956442
SGMS2	turquoise	-0.262355409	-0.69831098	-0.363500409	-0.321929243	-0.510841857	0.870270024	0.236000474
B3GLCT	yellow	0.160422323	0.142506712	0.040106269	0.397765797	0.331890067	-0.212311035	-0.186823928
TRIM35	blue	0.442385453	0.036228697	0.529249754	-0.329156014	-0.178812417	-0.082030402	-0.398849205
LINC01000	turquoise	-0.399206745	-0.349463069	-0.657568691	-0.082785841	-0.268989431	0.689650555	0.106041869
MIAT	blue	0.774892469	-0.104945913	-0.279547172	-0.054606206	-0.152153336	-0.409990131	-0.381256871
ELOVL7	yellow	-0.271773779	-0.313608683	0.072903464	-0.202381059	0.191103326	0.183655318	0.89236838
SUSD3	turquoise	-0.409261671	0.757581676	0.336289368	-0.068742025	0.579854791	-0.528975665	-0.151280978
CPNE5	red	-0.424860957	0.312085834	0.332693931	0.030208385	0.891046131	-0.233014919	0.456536135
ZNF503	turquoise	-0.217687495	-0.555596028	0.001315928	-0.211850274	-0.619470585	0.821599359	0.006539757
SFMBT2	yellow	0.352248232	0.308544067	-0.1440063	0.341947083	-0.231781157	-0.082234767	-0.816122662
NFXL1	turquoise	0.078765007	0.393871895	-0.091825916	-0.029318186	0.481902947	-0.517032097	0.10712951
IKBIP	turquoise	0.195665794	-0.767268884	-0.278295526	0.138229992	-0.599808925	0.808073521	0.043063051
TSPAN18	yellow	-0.288487953	-0.149728779	-0.168133503	0.073138871	0.252873245	-0.026459389	0.839168874
HES4	red	0.248324818	-0.073373088	-0.130657958	0.608664959	-0.401088654	0.309390076	-0.223510677
TMC8	turquoise	0.140510432	0.617330072	0.007581013	0.011375686	0.295727704	-0.733995025	-0.106838084
MBOAT1	turquoise	-0.193507074	-0.661372245	-0.299453794	0.026880921	-0.446184764	0.847163862	0.135035318
YBEY	turquoise	0.496841971	0.277498791	0.294150557	-0.067113792	0.289509141	-0.521168841	0.040061744
ERP27	brown	0.034612719	0.548001184	0.215574858	-0.148514169	0.468891967	-0.303400593	-0.178927139
PAX8-AS1	red	0.029885136	-0.299792095	-0.253648468	-0.085992378	-0.451708027	0.214426112	-0.209238463
EPSTI1	turquoise	-0.159135082	-0.575023106	0.199056796	0.04140579	-0.350867497	0.707458081	0.360899193
FBXL16	blue	-0.672789772	0.179211571	-0.16683308	-0.176367124	0.438949189	-0.185751272	0.52702599
EBF1	red	-0.064356564	0.458458245	0.245372518	0.228742848	0.917589636	-0.582503032	0.092871045
RIPOR3	yellow	-0.387941135	-0.380787111	0.204356119	-0.207319824	0.242162025	0.217493454	0.81536416
ZNF75A	turquoise	0.498313023	0.670077263	0.327245722	0.021400805	0.357485178	-0.813764161	-0.339433783
OXNAD1	brown	-0.270459146	0.918552592	0.154501585	-0.008269299	0.409833189	-0.457612115	-0.422258439
HYLS1	green	0.394240242	-0.024933098	-0.031712462	-0.097039072	0.272733746	-0.216409997	0.165902179
GTSF1	green	0.015701914	0.261860017	0.667494959	0.151033513	0.396407947	-0.156197537	0.031397546
RNF166	yellow	0.553667247	-0.566755551	-0.036191992	-0.075151172	-0.232133498	0.178289125	0.090563988
ENPP5	blue	0.712395624	-0.199753726	-0.241732674	0.337092763	-0.422866358	0.083557458	-0.533578988
LGR6	blue	0.744869658	-0.166013114	-0.086891207	0.291119548	-0.484118165	-0.043018689	-0.624187807
LOC389831	turquoise	-0.227099032	-0.540994258	-0.547039744	-0.201986928	-0.474528101	0.484085962	0.521549366
TRABD2A	brown	-0.119741377	0.893594182	0.116534015	0.054700604	0.333371624	-0.583172181	-0.383851101
LOC154761	brown	-0.122064178	0.916081535	0.564679721	0.168527674	0.448237592	-0.444384767	-0.4411014
ANXA2R	turquoise	0.311289385	0.699754085	0.250923961	-0.063881788	0.494868711	-0.784723842	-0.23131257
LOC100506990	blue	0.196297775	-0.043949765	-0.051817437	-0.293352659	-0.10413395	-0.060125497	0.289168111
NBPF20	yellow	-0.04114532	-0.128757819	-0.235994785	0.27292063	0.207056401	-0.197294736	0.494170383
FGD4	turquoise	-0.429130643	-0.572605536	-0.485234424	-0.154613664	-0.473161798	0.912971068	0.147165598
LOC100506098	brown	0.075277834	0.497738583	0.72232039	0.102013224	0.587418101	-0.44182517	-0.347058902
CEP85L	brown	0.071909443	0.74881745	0.430347061	-0.106276558	0.51919511	-0.747448753	-0.276164759
RARA-AS1	turquoise	-0.216990082	-0.432778124	-0.109571843	-0.10489303	-0.565768784	0.795603187	0.157389734
NAPSB	turquoise	-0.682290514	-0.291781285	-0.147700795	0.007094179	-0.150819483	0.712117455	0.143270015
ZG16B	blue	-0.623560594	0.056425098	0.312395287	0.438202716	0.195885182	0.401565109	0.336954203
NAP1L5	blue	0.755925922	0.153482421	0.328468487	-0.091685971	-0.025357981	-0.618628843	-0.278160489
JAML	turquoise	-0.634673175	-0.30464031	-0.333424154	-0.193793766	-0.276941094	0.868618843	0.084442193
PPM1L	blue	0.693390321	-0.336490469	-0.436529838	-0.162379883	-0.565795922	0.035629104	-0.127425232
RABGEF1	red	-0.042805149	0.365254326	0.08569871	0.308491242	0.313545178	0.0638612	-0.368431139
RNF144B	turquoise	-0.614593276	-0.063723967	-0.43705864	0.017363901	-0.170653252	0.632166319	-0.133177938
OLIG1	turquoise	-0.639704598	-0.24728629	-0.457278091	0.149238674	-0.150707001	0.593137721	0.045872794
PLEKHG4	brown	-0.142794639	0.798522113	0.129535324	-0.197388357	0.261969581	-0.383905314	-0.150414555
S1PR3	turquoise	-0.153103439	-0.398800543	0.035554726	0.023583068	-0.089574497	0.708542017	-0.126453003
ATG4C	turquoise	-0.563502392	-0.14966498	-0.175723063	-0.217023036	0.344088928	0.493940211	0.388786235
ZNF354C	turquoise	0.214416312	0.624270664	0.458951197	-0.113804428	0.404361937	-0.73854837	-0.035778426
HELZ2	turquoise	-0.090817483	-0.524950037	0.273431918	-0.223016613	-0.314271455	0.601319173	0.216560043
TBC1D10C	turquoise	0.360366558	0.646322178	0.186985841	-0.063591908	0.541016946	-0.738549072	-0.327845324
ACCS	green	-0.151175082	-0.008012282	-0.33598503	-0.117911569	-0.058923681	0.105980394	-0.102848984
DNLZ	turquoise	0.204170469	0.086714819	0.404879623	-0.269505186	0.45538537	-0.308119474	0.353778151
MFSD8	green	0.11799584	-0.472303115	-0.87356562	-0.08589315	-0.55167442	0.283202692	-0.08027071
CMC1	green	0.376398071	-0.073019721	0.213648547	0.464457873	-0.119879916	-0.062250935	-0.318824982
TDRD9	turquoise	-0.282756329	-0.23463248	-0.005346374	-0.096342723	-0.238751566	0.364305877	0.273063049
PCED1B	brown	-0.215264569	0.884108003	-0.015678022	-0.193079991	0.50555919	-0.570955253	-0.461623153
RBM43	yellow	-0.106421214	-0.209612462	0.084208683	-0.321859681	0.193949371	-0.013600735	0.324381626
CLHC1	green	-0.062636828	-0.04609105	-0.628775502	0.11533072	0.134196242	0.082319202	0.269991858
WDR27	blue	-0.51529451	0.260091547	0.074822798	-0.37012161	0.191647555	0.048204744	-0.270002421
NUDT16	turquoise	-0.235417334	-0.43125109	-0.284439422	-0.160199531	-0.438805907	0.869765909	-0.137052424
CPNE8	turquoise	-0.233994079	-0.684453681	-0.173424349	-0.05548815	-0.353254785	0.838780569	0.128497451
GGTA1	turquoise	0.007577588	-0.466300278	-0.189446689	0.010587483	-0.141766981	0.569597445	0.425742475
LINC01355	green	-0.008188768	-0.35465885	-0.938251302	-0.080213171	-0.095210567	0.16611256	0.092522551
GAB3	blue	0.936953041	-0.429731342	-0.106618858	0.069674224	-0.493033386	-0.048932035	-0.20882986
LOC643072	turquoise	-0.148947897	-0.310488995	0.209687976	-0.449981332	-0.143121958	0.545684452	0.259149493
BATF2	turquoise	-0.282563796	-0.45658823	-0.050568938	0.050725135	-0.289186262	0.605461564	0.200704093
MASTL	blue	0.551925138	-0.150362961	0.440907322	0.682702288	0.069668571	-0.037802735	-0.106123759
SLC22A15	turquoise	-0.194541354	-0.624887395	-0.155262214	0.213839666	-0.547293871	0.872925715	0.20934894
C1orf162	turquoise	-0.077689003	-0.494754541	0.051356026	-0.152166616	-0.700386136	0.821972696	-0.149611932
PEAR1	yellow	-0.275012636	-0.170409845	-0.016250671	-0.105181587	0.191631291	0.059891217	0.936473374
SRGAP2C	turquoise	-0.371654932	-0.586722202	-0.16505597	-0.20415303	-0.436251513	0.746554495	0.269918573
NINJ2-AS1	red	0.022901434	0.319724679	0.173194563	0.253480329	0.559039312	-0.428658039	0.322440408
LRG1	turquoise	-0.072077126	-0.609617708	0.054035144	0.105195768	-0.254244535	0.755301141	0.369422488
SPIN4	green	0.466124334	-0.312291783	-0.604151684	-0.08464693	-0.077393315	-0.054332313	-0.028444518
CXorf38	blue	0.35664492	-0.343189229	0.449218449	-0.017163742	-0.11591861	0.117101305	0.025902162
LINC-PINT	green	0.207424234	-0.019862417	0.484972959	0.421710385	0.04045461	-0.003634064	-0.134513043
CAPN12	turquoise	0.147346584	0.1022374	-0.20576731	0.014503269	0.247639906	-0.622641971	0.386923086
ZSWIM7	brown	0.137127681	0.320726034	0.112631284	-0.462127375	-0.017629482	-0.221396138	-0.33715861
NPTN-IT1	turquoise	-0.09006675	-0.527952333	-0.601120567	-0.40544871	-0.41107947	0.54597039	0.053469295
ZDBF2	green	-0.089897514	0.665182332	0.686209958	-0.056092829	0.733526756	-0.469765905	-0.095222055
RBPMS2	yellow	-0.218954603	-0.09975698	-0.151815009	-0.038008393	-0.241974139	-0.018052571	0.374200385
NHS	turquoise	-0.075112725	-0.597417203	-0.238882726	-0.037850097	-0.411052011	0.846447886	-0.023882333
METTL25	blue	-0.454526789	0.224444242	0.151585395	0.115847545	0.408008488	0.07403862	-0.198709617
ITGB2-AS1	red	-0.434040713	0.547307429	0.228497531	0.288612939	0.693413486	-0.048527022	-0.23981305
C17orf97	green	-0.527583861	0.367173302	0.467359174	-0.393836597	0.441680206	0.112493984	0.215979892
TPCN2	turquoise	-0.154626017	-0.452634252	-0.215347095	-0.075451982	-0.257619017	0.714416743	-0.095946241
ANKDD1A	red	0.431655586	-0.473217007	0.039642579	-0.425782957	-0.502113791	-0.008588194	0.251562538
MS4A14	turquoise	-0.289250761	-0.603185408	-0.442937361	0.002018692	-0.335145265	0.874303242	0.178880716
LRRK2	turquoise	-0.30296017	-0.609361697	-0.138553348	0.181519918	-0.383535856	0.959700029	0.157394539
ZNF320	yellow	0.288056958	0.478231265	-0.052303911	-0.288422786	0.276856403	-0.391532251	-0.6912307
GBP5	blue	0.532080251	0.089743497	0.237389812	0.482151264	0.061307253	-0.177803543	-0.126360763
SMIM5	yellow	0.152428207	-0.454269928	0.159498819	-0.235761778	-0.170412149	0.10082172	0.720658078
GLT1D1	turquoise	-0.270124018	-0.455970072	-0.126337834	0.002740643	-0.374031282	0.907540765	0.047974368
LOC100996740	brown	-0.206759292	0.919068684	0.34461004	0.022450934	0.60602733	-0.652030873	-0.48430191
FRMD3	turquoise	-0.279429465	-0.398393755	0.107612522	0.297249313	-0.13978653	0.729331781	0.313462788
BEX5	brown	-0.064877693	0.946725963	0.313169924	0.181435897	0.563286624	-0.701011977	-0.377226035
CMTM2	turquoise	0.078534153	-0.720287624	-0.145106813	0.196443833	-0.34226716	0.651157196	0.265816755
LOC102724851	green	0.035987563	-0.167632699	-0.507969742	-0.433421041	-0.520024258	0.130633393	-0.19361685
LINC00926	red	-0.3323947	0.617045035	-0.027958607	-0.003237691	0.823503363	-0.53947948	0.133726944
LPAR5	yellow	0.45580572	-0.38722075	-0.256319219	-0.015058326	0.057816301	-0.020585143	0.430878281
PHOSPHO2	blue	-0.428351123	-0.087405256	-0.425051446	0.169087623	0.16973925	0.359861489	0.222723804
NUMB	brown	-0.223536208	-0.73460729	-0.740328474	-0.128958736	-0.353123477	0.654566216	0.247516873
RASGEF1A	green	0.148460833	-0.128603378	0.46956466	-0.068400167	0.21676067	-0.201721241	-0.034245102
PKHD1L1	yellow	0.097632008	-0.482543078	-0.314318958	-0.102578411	-0.198919042	0.032942701	0.588404697
PATL2	turquoise	0.311430004	-0.332185466	-0.074612683	0.052354715	-0.067074359	0.21089756	-0.354028597
ZNF683	blue	0.519028865	-0.255279409	0.010320782	-0.069598737	-0.013858929	-0.29491956	-0.079556445
RNF157-AS1	brown	0.026629746	0.830956717	0.4936095	-0.272496182	0.527702412	-0.592777877	-0.483009954
MIR142	green	-0.091534183	-0.577899998	-0.849334889	-0.046614673	-0.57057281	0.479514466	0.082372606
TAFA1	turquoise	0.478349314	0.297686904	0.104518479	0.089321969	0.273716538	-0.467949454	-0.382874666
CMTM5	yellow	-0.277626731	-0.314151435	-0.064546364	-0.215639064	0.129881756	0.107239108	0.957474583
GPR155	green	-0.025146384	-0.00728176	-0.596061783	0.194940676	-0.208031693	0.166269993	-0.28060433
ZFP57	red	0.000243471	0.145147073	0.14975785	0.178543509	0.389828114	-0.22536292	0.13540417
EID3	brown	0.258222595	0.619858444	0.806747077	0.206606547	0.435645162	-0.516781515	-0.346937112
CLEC12B	red	-0.014681784	-0.111305439	-0.300555814	0.184811187	-0.311881019	0.389847503	0.035944388
PRSS30P	red	0.629727064	-0.55301961	-0.236736573	-0.347233392	-0.659518903	0.025349839	0.065522049
FBXO6	turquoise	0.059440334	-0.479469377	0.00620793	0.057664649	-0.509819935	0.648703915	0.01065844
EOMES	blue	0.806247716	-0.150093658	0.023259693	0.299460992	-0.168894817	-0.264964843	-0.46233779
NOG	brown	0.002476428	0.901770368	0.308493308	-0.070285623	0.282246714	-0.465512634	-0.595619479
ERMN	green	0.401998582	-0.243632344	-0.265111152	-0.313226568	-0.416973295	0.104307329	-0.258930155
ANKRD33B	yellow	-0.156483742	-0.308547352	0.095348773	0.036453453	0.448720246	-0.035607742	0.871975138
TTC39B	brown	0.331353002	0.670399946	0.295593971	0.122625728	0.235821914	-0.555661367	-0.585151913
FRG1HP	blue	-0.530938432	0.033522534	-0.553193991	-0.31017223	0.175030228	0.222810435	0.233060576
ARF1	green	0.006236149	-0.394930629	0.169052507	0.159385809	-0.388214573	0.308827333	-0.099313154
SLC22A16	turquoise	-0.235726311	-0.407054902	0.014496176	-0.321357604	-0.094882371	0.3438426	0.168172202
ZNF880	brown	-0.024390427	0.715151516	0.416627167	-0.187167884	0.086690339	-0.381790187	-0.529375411
LINC02591	green	0.357903071	-0.319562476	-0.734801444	-0.289691735	-0.482893932	0.252380388	-0.297836001
GGACT	brown	0.337353392	-0.49047653	-0.328240584	-0.015590659	-0.405650265	0.361935953	-0.414971587
LINC00685	red	-0.078750755	0.440730694	0.362720595	0.104247615	0.655689793	-0.382979712	0.133195991
SSBP3-AS1	green	0.33001431	-0.428242916	-0.505505006	-0.353346922	-0.356745667	-0.077724302	0.000402561
MIR181A2HG	turquoise	0.484495014	-0.413083003	-0.473314904	0.360593573	-0.450008064	0.326309259	-0.173745989
CREB5	turquoise	-0.270436012	-0.626555777	-0.365267063	0.057413461	-0.456737065	0.942078302	0.141826995
HSBP1L1	brown	-0.187275434	0.755523251	0.442088387	-0.28189753	0.176219753	-0.420259172	-0.350451415
PROK2	brown	0.167789097	-0.824869047	-0.02456947	0.143682466	-0.416857118	0.423272216	0.387986457
LINC00954	brown	-0.291312249	0.618812958	-0.300300039	0.05278144	0.512737825	-0.268502894	-0.181851677
SIGLEC17P	blue	0.624958266	-0.182278662	-0.291802539	-0.17476906	-0.091512749	-0.462126172	-0.08414867
LINGO2	blue	0.625922355	0.25498184	0.367867012	0.202368351	-0.234466674	-0.264016243	-0.216345863
LOXL1-AS1	blue	0.292834335	-0.151770878	-0.136681648	-0.061620191	0.109696462	-0.105882601	-0.202278926
RNASEH1-AS1	turquoise	0.261171113	0.513108911	0.380927064	-0.219898991	0.539451639	-0.57199686	-0.142124693
OR52K3P	turquoise	-0.125885945	-0.258693513	-0.530849978	0.065068745	-0.197738248	0.52803082	0.119417588
LOC100507642	turquoise	-0.359299701	-0.523056354	-0.466481983	0.007472552	-0.282782233	0.502292394	0.13450461
LOC100505874	yellow	-0.05991677	0.332800711	-0.150370581	-0.560186807	-0.297686495	0.022426437	-0.432938846
SEMA4B	red	-0.169850851	0.444509138	0.405733676	0.070546272	0.911343535	-0.329526134	0.087802663
BCDIN3D	green	0.445569316	0.065569511	-0.153952747	0.071301695	-0.0071559	-0.160437347	-0.040768863
ZNF792	green	0.081770862	0.730261307	0.549083546	0.020824515	0.755336865	-0.66537942	-0.31771926
RAB12	turquoise	-0.328565643	-0.164002705	-0.276023791	0.252992031	-0.502563249	0.57573478	-0.139306554
LOC100190986	green	-0.282745091	-0.354838906	-0.80863238	-0.035022968	-0.04511828	0.287422329	0.276882745
PRAG1	yellow	0.093247355	0.639950786	-0.173806454	-0.287963868	0.144603053	-0.379609311	-0.738609317
CMTM8	brown	-0.106006673	0.659321969	0.500862807	-0.343665807	0.478671949	-0.471833743	-0.038269733
ZNF542P	yellow	0.156231876	-0.164464868	-0.02629602	-0.322220928	0.071520846	-0.052042105	0.443564654
FLVCR1-DT	blue	-0.233647933	0.175727854	-0.423934526	0.517106934	-0.036014842	0.073381734	-0.055783686
LOC100505501	blue	0.835555976	0.002323862	0.18093897	-0.057177162	-0.179734662	-0.558697986	-0.277500109
GBP4	grey	0.202982257	0.217005362	0.275174275	0.781685445	0.112868516	0.03617279	-0.377765845
FLJ32255	brown	0.028783017	0.78024247	0.26777492	0.042672405	0.439877604	-0.675322959	-0.219248706
ELAPOR2	blue	-0.666185324	0.059990894	-0.146957181	-0.202622542	0.008626779	0.110110303	0.071072757
GIMAP8	turquoise	-0.077700845	-0.348225163	-0.516765976	-0.28837761	-0.2557931	0.588461724	-0.000957828
NRROS	turquoise	0.252479699	-0.601248837	-0.040678171	0.181856832	-0.626785136	0.764117649	-0.178253002
FCRLA	red	-0.162916236	0.470857437	0.24710651	0.197759755	0.950933995	-0.549788897	0.175716204
SNORD89	turquoise	-0.268953425	-0.655691294	-0.586604686	-0.145824114	-0.518846147	0.851413929	0.241169934
MCEMP1	turquoise	-0.183935203	-0.492670791	-0.007943732	-0.191190607	-0.227285222	0.774714912	0.288146805
HNRNPD-DT	turquoise	0.36379651	0.088017481	0.470654467	0.417149786	0.546379543	-0.46554035	0.224007254
ZNF567	turquoise	0.613026824	0.15857171	0.499731583	0.128187811	0.404794274	-0.491089845	-0.099387124
ZNF514	yellow	-0.109853882	-0.001878854	-0.242622307	0.194651733	0.183973699	0.123569085	-0.496265543
SMKR1	blue	0.794872105	0.174073636	0.287745498	-0.054397441	-0.093379533	-0.440729202	-0.352047067
TMEM170B	turquoise	-0.237465167	-0.549484173	-0.259869346	-0.257779904	-0.493363965	0.898387653	0.187777684
RGL4	brown	-0.026623566	0.873648939	0.416823091	-0.200399989	0.31081782	-0.4253392	-0.47455257
VSTM1	turquoise	-0.322766825	-0.517239977	0.271526879	-0.039718736	-0.234843756	0.648734733	0.089700458
FCRL1	red	-0.372807251	0.604239318	0.39257685	0.221017105	0.95473384	-0.512732241	0.146591325
ZNF232-AS1	turquoise	0.525245838	0.59842088	0.373582786	-0.079074147	0.328547868	-0.744134061	-0.536058372
H2BC4	turquoise	-0.260339933	-0.66566395	-0.251608936	-0.023884922	-0.136298554	0.668931929	0.423405354
LINC01215	brown	-0.3009947	0.868610038	0.180816284	0.136540322	0.785117352	-0.677772086	-0.160568676
BTLA	red	-0.101341327	0.641945754	0.490324063	0.1903369	0.935640231	-0.563306744	-0.000999171
NLRC3	turquoise	0.643246167	0.201274608	-0.248999052	-0.170907979	0.119808653	-0.735458288	-0.326734992
TMED6	green	-0.466732659	0.583088409	0.621774094	-0.23637799	0.278782187	-0.121900961	-0.050578455
RNF175	turquoise	-0.401403967	0.012382035	-0.165527812	-0.234915617	-0.312099249	0.436379517	-0.215640327
ZNF439	turquoise	0.357207862	0.423760178	-0.273338613	-0.250818011	-0.096354484	-0.373642202	-0.468590153
LOC101928152	yellow	-0.14428945	0.272979804	-0.052321268	-0.507346423	-0.310356178	-0.03606618	-0.432026802
EIF3C	turquoise	0.050349942	-0.623237051	-0.271196496	0.277292876	-0.5443745	0.591509921	0.32371749
TOGARAM2	blue	0.822536976	-0.296441419	-0.192607361	0.040450763	-0.365931254	-0.238585005	-0.153802834
TTC16	blue	0.707864214	0.116081308	0.031185154	-0.287393265	0.169024545	-0.602836967	-0.207389355
MIR646HG	red	0.197312508	-0.298448605	-0.595024676	0.07636312	-0.731898508	0.404047514	-0.22129163
LINC01588	turquoise	0.271256914	0.384783877	0.341890747	0.557554133	0.384939895	-0.396796049	-0.567431876
ALKAL2	red	0.297415872	-0.099299199	0.082123142	-0.018350186	-0.564742993	0.118106782	-0.334869974
MLKL	turquoise	-0.373639127	-0.604350393	-0.006186991	0.083333298	-0.409345785	0.915994731	0.227759917
TMEM154	turquoise	-0.359125735	-0.517846879	-0.257812072	-0.13714087	-0.058532144	0.621735235	0.376957981
RBP7	turquoise	-0.682905135	-0.321989638	-0.193456186	-0.124342556	-0.092687024	0.824054493	0.046068275
ZNF818P	red	-0.348361597	0.723932265	0.210377754	0.019400393	0.747576528	-0.535417868	0.147969117
ARMH1	brown	-0.259029242	0.721841679	0.404981051	0.117389015	0.503779318	-0.100286573	-0.414373859
TMEM71	blue	0.679118309	-0.518907047	-0.019559749	0.032096412	-0.371998484	0.137075412	0.247446602
ANKRD22	turquoise	-0.237396194	0.003522019	0.422179905	0.358466759	-0.116380352	0.439380231	-0.113885528
CLYBL	green	-0.289903985	0.283121169	0.610615842	-0.027651219	0.676422361	-0.140183964	0.363629572
SMG1P5	green	-0.222373471	-0.309320422	-0.808129574	-0.032429964	-0.169568484	0.276715007	0.012024565
FCRLB	blue	0.788432447	0.063302379	-0.008531047	-0.184357807	-0.333851034	-0.313234809	-0.478162294
MICU3	green	0.119464649	0.558507314	0.606841731	0.29178443	0.160118186	-0.296289011	-0.245230068
SETD9	turquoise	-0.252422231	-0.292875131	-0.365966184	0.190088239	-0.022946197	0.633327604	-0.026054754
HEXIM2	yellow	-0.383887449	0.114481209	-0.265460048	-0.255919997	0.484926525	-0.081252108	0.648386089
JAKMIP1	turquoise	0.436762995	-0.005256304	-0.031857631	0.038637964	0.145078282	-0.441127499	-0.09875253
LOC374443	yellow	0.287333901	0.645024639	0.4638674	0.312859883	0.202760882	-0.352256045	-0.636345839
ATP2B1-AS1	turquoise	-0.18728894	-0.464171474	-0.044036476	0.049598459	-0.314102739	0.721453885	-0.014382723
ZNF780A	brown	0.108081237	0.473013946	0.133259986	-0.229693736	0.405924911	-0.11013132	-0.331303778
ZNF420	red	0.041736808	0.277050784	0.165635901	0.164093763	0.388475283	0.016883651	-0.092612879
DAPK1-IT1	turquoise	-0.346412467	-0.507843885	-0.58992695	-0.092152517	-0.496881703	0.808101532	0.052568775
TRG-AS1	blue	0.537265094	-0.176315207	-0.54720484	-0.033904993	-0.33644925	-0.303224338	-0.289050427
LINC02397	red	-0.05188599	0.557411493	0.548058635	0.244601414	0.808568442	-0.544517345	-0.085290304
EPHX4	blue	0.387562117	-0.319555674	-0.088764807	0.23191774	0.00095024	-0.03676665	-0.174251217
CHST13	blue	-0.503504307	-0.077166542	-0.536635266	-0.240844289	-0.256549893	0.251631953	0.023889346
HLA-DPB2	red	-0.256137962	0.017259646	-0.225886699	-0.196857303	-0.428851472	-0.007587445	0.18729994
TIGIT	blue	-0.093295026	0.474030346	0.068069794	0.118028644	0.471817465	-0.43869973	-0.319877877
FRG1JP	red	-0.032484512	-0.204358298	-0.255796688	-0.37431652	-0.614967025	0.269876502	-0.387658894
LOC101928419	yellow	-0.316559242	-0.567762467	-0.007227331	-0.219591943	-0.17276868	0.39315276	0.857306355
SCARNA17	green	0.270166869	-0.279219567	-0.734153903	0.041767787	0.090942178	-0.11057412	0.052222602
RASGRP4	turquoise	-0.427249416	-0.581950027	-0.417043078	-0.087329241	-0.345009064	0.714799332	0.500846115
TRBV27	yellow	-0.343253722	0.108043765	-0.042308096	-0.435788765	0.231576793	-0.21399103	0.735420758
[truncated: 17 more rows]
